# Supplementary material for: Transcript Profile of the Response of Two Soybean Genotypes to Potassium Deficiency
Source: PLoS One. 2012 Jul 5;7(7):e39856. doi: 10.1371/journal.pone.0039856 (PMC3390323; doi:10.1371/journal.pone.0039856)
Supplement: Table S4 — Unknown genes differentially expressed in the roots and shoots of two varieties of soybeans under low-K stress conditions. (XLS) [file pone.0039856.s005.xls]

## Sheet: Sheet1
Supplemental Table S4. Unknown genes differentially expressed in the roots and shoots of two varieties of soybeans under low-K stress conditions.
Short term:0.5h,2h,6h,12h;Long term:3D,6D,9D,12D
Short term-Root												Short term-Leaf												Long term-Root												Long term-Leaf
You06-71(L1)				VS		Hengchun04-11(L2)						You06-71(L3)				VS		Hengchun04-11(L4)						You06-71(L5)				VS		Hengchun04-11(L6)						You06-71(L7)				VS		Hengchun04-11(L8)
Up-regulated						Down-regulated						Up-regulated						Down-regulated						Up-regulated						Down-regulated						Up-regulated						Down-regulated
450						309						527						366						483						486						768						890
Gene	TPM-hengchungenxi0-5h	TPM-yougenxi0-5h	log2 Ratio(yougenxi0-5h/hengchungenxi0-5h)	blast nr		Gene	TPM-hengchungenxi0-5h	TPM-yougenxi0-5h	log2 Ratio(yougenxi0-5h/hengchungenxi0-5h)	blast nr		Gene	TPM-hengchunye0_5h	TPM-youye0_5h	log2 Ratio(youye0_5h/hengchunye0_5h)	blast nr		Gene	TPM-hengchunye0_5h	TPM-youye0_5h	log2 Ratio(youye0_5h/hengchunye0_5h)	blast nr		Gene	TPM-hengchungenxi3d	TPM-yougenxi3d	log2 Ratio(yougenxi3d/hengchungenxi3d)	blast nr		Gene	TPM-hengchungenxi3d	TPM-yougenxi3d	log2 Ratio(yougenxi3d/hengchungenxi3d)	blast nr		Gene	TPM-hengchunye3d	TPM-youye3d	log2 Ratio(youye3d/hengchunye3d)	blast nr		Gene	TPM-hengchunye3d	TPM-youye3d	log2 Ratio(youye3d/hengchunye3d)	blast nr
Glyma12g30800	0.01	248.43	14.6006	gi|255628041|gb|ACU14365.1|/1.48165e-14/unknown [Glycine max]		Glyma18g46330	56.8	0.01	-12.4717	gi|255629121|gb|ACU14905.1|/8.47886e-38/unknown [Glycine max]		Glyma18g48310	0.01	18.98	10.8903	gi|255629936|gb|ACU15320.1|/2.97532e-85/unknown [Glycine max]		Glyma15g09260	79.59	39.71	-1.00308	gi|217074982|gb|ACJ85851.1|/0/unknown [Medicago truncatula]		Glyma02g36640	0.01	81.4	12.9908	gi|255628505|gb|ACU14597.1|/5.60948e-20/unknown [Glycine max]		Glyma13g01330	4	0.01	-8.64386	gi|255639897|gb|ACU20241.1|/0/unknown [Glycine max]		Glyma18g50500	0.01	182.97	14.1593	gi|255630665|gb|ACU15692.1|/4.50345e-54/unknown [Glycine max]		Glyma18g39690	701.46	350.59	-1.00058	gi|255627801|gb|ACU14245.1|/6.39998e-21/unknown [Glycine max]
Glyma05g04490	0.01	118.95	13.5381	gi|255625839|gb|ACU13264.1|/2.21289e-47/unknown [Glycine max]		Glyma06g14330	48.38	0.01	-12.2402	gi|255645127|gb|ACU23062.1|/1.19204e-104/unknown [Glycine max]		Glyma18g48230	0.01	5.57	9.12153	gi|255644766|gb|ACU22885.1|/0/unknown [Glycine max]		Glyma08g36590	17.81	8.88	-1.00406	gi|255636604|gb|ACU18640.1|/1.6117e-141/unknown [Glycine max]		Glyma14g03800	0.01	33.99	11.7309	gi|255640869|gb|ACU20717.1|/1.01261e-77/unknown [Glycine max]		Glyma14g35720	3.64	0.01	-8.50779	gi|255630897|gb|ACU15811.1|/9.51094e-111/unknown [Glycine max]		Glyma05g04490	0.01	127.92	13.643	gi|255625839|gb|ACU13264.1|/2.21289e-47/unknown [Glycine max]		Glyma09g38340	660.81	330.12	-1.00124	gi|255634458|gb|ACU17594.1|/0/unknown [Glycine max]
Glyma02g36640	0.01	64.49	12.6549	gi|255628505|gb|ACU14597.1|/5.60948e-20/unknown [Glycine max]		Glyma06g45410	38.04	0.01	-11.8933	gi|255628967|gb|ACU14828.1|/3.96782e-44/unknown [Glycine max]		Glyma19g43460	0.01	4.88	8.93074	gi|255629027|gb|ACU14858.1|/1.1729e-119/unknown [Glycine max]		Glyma06g17160	28.35	14.11	-1.00663	gi|255644714|gb|ACU22859.1|/2.82732e-149/unknown [Glycine max]		Glyma05g32520	0.01	13.07	10.352	gi|255639535|gb|ACU20062.1|/8.0255e-116/unknown [Glycine max]		Glyma09g03460	3.28	0.01	-8.35755	gi|217074538|gb|ACJ85629.1|/0/unknown [Medicago truncatula]		Glyma12g30800	0.01	113.45	13.4698	gi|255628041|gb|ACU14365.1|/1.48165e-14/unknown [Glycine max]		Glyma17g34940	30.79	15.35	-1.00422	gi|255633082|gb|ACU16896.1|/6.33006e-95/unknown [Glycine max]
Glyma17g34420	0.01	32.58	11.6698	gi|255629347|gb|ACU15018.1|/1.02014e-82/unknown [Glycine max]		Glyma13g24490	35.23	0.01	-11.7826	gi|255627263|gb|ACU13976.1|/1.28686e-90/unknown [Glycine max]		Glyma09g41440	0.01	4.7	8.87652	gi|255644930|gb|ACU22965.1|/0/unknown [Glycine max]		Glyma11g16120	43.79	21.77	-1.00826	gi|255637660|gb|ACU19154.1|/5.83665e-86/unknown [Glycine max]		Glyma17g17790	0.01	9.06	9.82337	gi|255638871|gb|ACU19738.1|/0/unknown [Glycine max]		Glyma06g45410	2.55	0.01	-7.99435	gi|255628967|gb|ACU14828.1|/3.96782e-44/unknown [Glycine max]		Glyma07g16830	0.01	48.52	12.2444	gi|255630907|gb|ACU15816.1|/2.93677e-125/unknown [Glycine max]		Glyma12g30600	27.97	13.94	-1.00465	gi|255644846|gb|ACU22923.1|/4.19878e-114/unknown [Glycine max]
Glyma03g39930	0.01	22.89	11.1605	gi|255629127|gb|ACU14908.1|/1.78893e-93/unknown [Glycine max]		Glyma05g13530	31.55	0.01	-11.6234	gi|255642337|gb|ACU21433.1|/1.53316e-07/unknown [Glycine max]		Glyma13g23990	0.01	4.7	8.87652	gi|255631690|gb|ACU16212.1|/1.40348e-94/unknown [Glycine max]		Glyma12g02170	17.26	8.53	-1.01681	gi|255639313|gb|ACU19954.1|/3.48203e-104/unknown [Glycine max]		Glyma18g53420	0.01	8.19	9.67772	gi|87162801|gb|ABD28596.1|/1.26229e-99/Protein of unknown function DUF6, transmembrane [Medicago truncatula]		Glyma02g16800	2.37	0.01	-7.88874	gi|255631948|gb|ACU16341.1|/5.83921e-93/unknown [Glycine max]		Glyma02g36640	0.01	46.93	12.1963	gi|255628505|gb|ACU14597.1|/5.60948e-20/unknown [Glycine max]		Glyma17g05530	116.65	58.05	-1.00682	gi|255641747|gb|ACU21144.1|/0/unknown [Glycine max]
Glyma07g16830	0.01	19.21	10.9076	gi|255630907|gb|ACU15816.1|/2.93677e-125/unknown [Glycine max]		Glyma02g41820	27	0.01	-11.3987	gi|255641861|gb|ACU21199.1|/0/unknown [Glycine max]		Glyma17g34650	0.01	4.18	8.70736	gi|255646921|gb|ACU23930.1|/0/unknown [Glycine max]		Glyma13g39270	52.33	25.78	-1.02139	gi|255632980|gb|ACU16844.1|/5.90431e-106/unknown [Glycine max]		Glyma14g21190	0.01	6.62	9.37069	gi|255636576|gb|ACU18626.1|/3.10196e-111/unknown [Glycine max]		Glyma10g38220	2.37	0.01	-7.88874	gi|255638435|gb|ACU19527.1|/1.49226e-68/unknown [Glycine max]		Glyma12g08470	0.01	26.64	11.3794	gi|255630246|gb|ACU15478.1|/1.66311e-90/unknown [Glycine max]		Glyma09g33790	21.29	10.59	-1.00747	gi|255639879|gb|ACU20232.1|/5.66462e-126/unknown [Glycine max]
Glyma06g45240	0.01	13.7	10.42	gi|255626707|gb|ACU13698.1|/9.2707e-44/unknown [Glycine max]		Glyma16g31990	25.07	0.01	-11.2917	gi|255629940|gb|ACU15322.1|/1.04259e-81/unknown [Glycine max]		Glyma08g07960	0.01	4.01	8.64746	gi|255647785|gb|ACU24353.1|/2.11089e-173/unknown [Glycine max]		Glyma08g04190	19.81	9.75	-1.02275	gi|255640513|gb|ACU20542.1|/2.00514e-20/unknown [Glycine max]		Glyma13g23990	0.01	6.45	9.33316	gi|255631690|gb|ACU16212.1|/1.40348e-94/unknown [Glycine max]		Glyma13g30540	2.37	0.01	-7.88874	gi|255634666|gb|ACU17695.1|/1.10248e-133/unknown [Glycine max]		Glyma17g36090	0.01	26.29	11.3603	gi|255636611|gb|ACU18643.1|/0/unknown [Glycine max]		Glyma10g32730	127.38	63.34	-1.00795	gi|255627403|gb|ACU14046.1|/2.60784e-92/unknown [Glycine max]
Glyma17g17790	0.01	12.7	10.3106	gi|255638871|gb|ACU19738.1|/0/unknown [Glycine max]		Glyma03g12150	21.56	0.01	-11.0741	gi|255633504|gb|ACU17110.1|/1.21059e-25/unknown [Glycine max]		Glyma15g40570	0.01	4.01	8.64746	gi|255645373|gb|ACU23183.1|/1.83547e-124/unknown [Glycine max]		Glyma17g37900	116.84	57.47	-1.02365	gi|255640776|gb|ACU20672.1|/1.82282e-134/unknown [Glycine max]		Glyma06g02100	0.01	5.93	9.21189	gi|255641632|gb|ACU21088.1|/1.47853e-137/unknown [Glycine max]		Glyma03g26450	2.37	0.01	-7.88874	gi|255631758|gb|ACU16246.1|/6.71033e-30/unknown [Glycine max]		Glyma18g48310	0.01	18	10.8138	gi|255629936|gb|ACU15320.1|/2.97532e-85/unknown [Glycine max]		Glyma05g37350	20.58	10.23	-1.00844	gi|255646699|gb|ACU23823.1|/2.30955e-127/unknown [Glycine max]
Glyma14g21190	0.01	12.03	10.2324	gi|255636576|gb|ACU18626.1|/3.10196e-111/unknown [Glycine max]		Glyma15g11430	17.71	0.01	-10.7903	gi|255647214|gb|ACU24075.1|/5.04899e-08/unknown [Glycine max]		Glyma17g16190	0.01	4.01	8.64746	gi|255625617|gb|ACU13153.1|/7.26965e-90/unknown [Glycine max]		Glyma18g51980	34.71	17.07	-1.02389	gi|255638841|gb|ACU19724.1|/0/unknown [Glycine max]		Glyma05g37370	0.01	5.4	9.07682	gi|255639549|gb|ACU20069.1|/0/unknown [Glycine max]		Glyma19g43460	57.13	0.52	-6.77959	gi|255629027|gb|ACU14858.1|/1.1729e-119/unknown [Glycine max]		Glyma09g41440	0.01	14.12	10.4635	gi|255644930|gb|ACU22965.1|/0/unknown [Glycine max]		Glyma06g05810	1104.7	549.09	-1.00854	gi|255637994|gb|ACU19313.1|/1.87732e-60/unknown [Glycine max]
Glyma05g32520	0.01	11.86	10.2119	gi|255639535|gb|ACU20062.1|/8.0255e-116/unknown [Glycine max]		Glyma17g35660	16.83	0.01	-10.7168	gi|255638949|gb|ACU19776.1|/1.71608e-70/unknown [Glycine max]		Glyma17g29640	0.01	3.66	8.5157	gi|255646066|gb|ACU23520.1|/2.78425e-50/unknown [Glycine max]		Glyma01g03830	22.35	10.97	-1.02671	gi|255635947|gb|ACU18320.1|/0/unknown [Glycine max]		Glyma20g27370	0.01	5.4	9.07682	gi|255645416|gb|ACU23204.1|/1.8722e-79/unknown [Glycine max]		Glyma11g03150	7.1	0.35	-4.34239	gi|255640362|gb|ACU20469.1|/2.71108e-17/unknown [Glycine max]		Glyma08g19180	0.01	12.35	10.2703	gi|255639780|gb|ACU20183.1|/0/unknown [Glycine max]		Glyma03g35490	99.76	49.58	-1.0087	gi|255625815|gb|ACU13252.1|/7.82847e-38/unknown [Glycine max]
Glyma18g53420	0.01	11.19	10.128	gi|87162801|gb|ABD28596.1|/1.26229e-99/Protein of unknown function DUF6, transmembrane [Medicago truncatula]		Glyma08g04460	10.52	0.01	-10.0389	gi|118489716|gb|ABK96659.1|/2.56839e-171/unknown [Populus trichocarpa x Populus deltoides]		Glyma07g23260	0.01	3.48	8.44294	gi|21700771|gb|AAG38147.1|/8.35781e-109/unknown [Glycine max]		Glyma12g27340	62.87	30.83	-1.02804	gi|255636178|gb|ACU18431.1|/1.35609e-145/unknown [Glycine max]		Glyma08g42500	0.01	4.36	8.76818	gi|255646513|gb|ACU23734.1|/1.75053e-158/unknown [Glycine max]		Glyma12g32690	11.83	0.87	-3.76529	gi|255632061|gb|ACU16383.1|/1.26218e-29/unknown [Glycine max]		Glyma03g39930	0.01	11.47	10.1636	gi|255629127|gb|ACU14908.1|/1.78893e-93/unknown [Glycine max]		Glyma08g11850	39.76	19.76	-1.00873	gi|194466185|gb|ACF74323.1|/9.52143e-61/unknown [Arachis hypogaea]
Glyma12g08470	0.01	10.19	9.99294	gi|255630246|gb|ACU15478.1|/1.66311e-90/unknown [Glycine max]		Glyma09g38320	9.64	0.01	-9.91289	gi|255632542|gb|ACU16621.1|/8.84541e-104/unknown [Glycine max]		Glyma08g27220	0.01	3.48	8.44294	gi|255637099|gb|ACU18881.1|/1.7566e-157/unknown [Glycine max]		Glyma08g46190	15.99	7.84	-1.02824	gi|255648360|gb|ACU24631.1|/0/unknown [Glycine max]		Glyma12g08470	0.01	4.18	8.70736	gi|255630246|gb|ACU15478.1|/1.66311e-90/unknown [Glycine max]		Glyma04g04780	6.55	0.52	-3.65491	gi|289540904|gb|ADD09578.1|/0/unknown [Trifolium repens]		Glyma18g46540	0.01	11.47	10.1636	gi|255636132|gb|ACU18409.1|/1.35619e-142/unknown [Glycine max]		Glyma02g31550	18.12	9	-1.00959	gi|255646280|gb|ACU23624.1|/2.18028e-140/unknown [Glycine max]
Glyma08g12570	0.01	10.02	9.96867	gi|255631185|gb|ACU15958.1|/4.05358e-117/unknown [Glycine max]		Glyma12g32070	8.94	0.01	-9.80413	gi|255627895|gb|ACU14292.1|/2.99208e-91/unknown [Glycine max]		Glyma05g36750	0.01	3.31	8.37069	gi|255626145|gb|ACU13417.1|/1.80992e-71/unknown [Glycine max]		Glyma12g35430	17.08	8.36	-1.03073	gi|255631710|gb|ACU16222.1|/2.99899e-15/unknown [Glycine max]		Glyma12g08490	0.01	4.18	8.70736	gi|217072520|gb|ACJ84620.1|/3.74602e-129/unknown [Medicago truncatula]		Glyma02g07940	27.66	2.27	-3.60704	gi|255639495|gb|ACU20042.1|/0/unknown [Glycine max]		Glyma02g45810	0.01	10.76	10.0715	gi|255638151|gb|ACU19389.1|/1.51202e-105/unknown [Glycine max]		Glyma08g06920	18.83	9.35	-1.00999	gi|255631542|gb|ACU16138.1|/1.85436e-105/unknown [Glycine max]
Glyma12g08490	0.01	8.35	9.70563	gi|217072520|gb|ACJ84620.1|/3.74602e-129/unknown [Medicago truncatula]		Glyma05g29440	8.59	0.01	-9.74651	gi|217073202|gb|ACJ84960.1|/1.08943e-67/unknown [Medicago truncatula]		Glyma11g03470	0.01	3.31	8.37069	gi|255631091|gb|ACU15911.1|/4.99606e-28/unknown [Glycine max]		Glyma17g04060	37.8	18.46	-1.03398	gi|255631860|gb|ACU16297.1|/1.64872e-07/unknown [Glycine max]		Glyma12g12800	0.01	4.18	8.70736	gi|255643584|gb|ACU22682.1|/8.26665e-169/unknown [Glycine max]		Glyma02g01190	27.29	2.27	-3.58761	gi|255640314|gb|ACU20445.1|/6.92637e-163/unknown [Glycine max]		Glyma18g43980	0.01	10.06	9.97441	gi|255635396|gb|ACU18051.1|/0/unknown [Glycine max]		Glyma07g34530	17.07	8.47	-1.01103	gi|255628923|gb|ACU14806.1|/5.49938e-94/unknown [Glycine max]
Glyma13g23990	0.01	7.52	9.55459	gi|255631690|gb|ACU16212.1|/1.40348e-94/unknown [Glycine max]		Glyma18g44810	7.54	0.01	-9.55842	gi|255639189|gb|ACU19893.1|/0/unknown [Glycine max]		Glyma17g12500	0.01	3.31	8.37069	gi|255632974|gb|ACU16841.1|/1.08994e-51/unknown [Glycine max]		Glyma10g30400	46.34	22.47	-1.04426	gi|255638648|gb|ACU19629.1|/0/unknown [Glycine max]		Glyma07g17180	0.01	4.01	8.64746	gi|255640681|gb|ACU20625.1|/0/unknown [Glycine max]		Glyma11g29830	4	0.35	-3.51457	gi|255631938|gb|ACU16336.1|/3.97498e-56/unknown [Glycine max]		Glyma17g12340	0.01	9.35	9.86882	gi|217073762|gb|ACJ85241.1|/3.98603e-124/unknown [Medicago truncatula]		Glyma20g02350	17.07	8.47	-1.01103	gi|255632314|gb|ACU16515.1|/8.47682e-49/unknown [Glycine max]
Glyma09g37290	0.01	6.52	9.34873	gi|255628445|gb|ACU14567.1|/1.21241e-40/unknown [Glycine max]		Glyma11g20720	7.01	0.01	-9.45327	gi|255646140|gb|ACU23556.1|/1.20097e-93/unknown [Glycine max]		Glyma18g46560	0.01	3.31	8.37069	gi|255625791|gb|ACU13240.1|/6.42664e-67/unknown [Glycine max]		Glyma16g01680	17.26	8.36	-1.04586	gi|255647570|gb|ACU24248.1|/4.86473e-137/unknown [Glycine max]		Glyma05g36750	0.01	3.83	8.5812	gi|255626145|gb|ACU13417.1|/1.80992e-71/unknown [Glycine max]		Glyma15g11710	5.64	0.52	-3.43911	gi|255630615|gb|ACU15667.1|/9.60772e-75/unknown [Glycine max]		Glyma20g27370	0.01	8.29	9.69523	gi|255645416|gb|ACU23204.1|/1.8722e-79/unknown [Glycine max]		Glyma16g34560	65.45	32.47	-1.01129	gi|217072576|gb|ACJ84648.1|/4.54828e-128/unknown [Medicago truncatula]
Glyma20g27370	0.01	6.35	9.31061	gi|255645416|gb|ACU23204.1|/1.8722e-79/unknown [Glycine max]		Glyma16g27690	5.96	0.01	-9.21917	gi|255646254|gb|ACU23611.1|/2.41061e-115/unknown [Glycine max]		Glyma06g21170	0.01	2.96	8.20945	gi|255639261|gb|ACU19929.1|/1.31278e-163/unknown [Glycine max]		Glyma11g08590	71.6	34.66	-1.04669	gi|255630855|gb|ACU15790.1|/1.0544e-70/unknown [Glycine max]		Glyma06g11890	0.01	3.83	8.5812	gi|255638809|gb|ACU19708.1|/7.27728e-82/unknown [Glycine max]		Glyma06g09170	16.92	1.74	-3.28157	gi|255647804|gb|ACU24362.1|/1.08102e-91/unknown [Glycine max]		Glyma20g29790	0.01	7.94	9.633	gi|255626355|gb|ACU13522.1|/1.38678e-112/unknown [Glycine max]		Glyma11g01960	14.95	7.41	-1.0126	gi|255636057|gb|ACU18373.1|/0/unknown [Glycine max]
Glyma17g06420	0.01	5.18	9.01681	gi|255639165|gb|ACU19882.1|/6.72114e-31/unknown [Glycine max]		Glyma06g45400	5.43	0.01	-9.08481	gi|255638604|gb|ACU19608.1|/1.23638e-27/unknown [Glycine max]		Glyma13g05240	0.01	2.96	8.20945	gi|255641565|gb|ACU21056.1|/0/unknown [Glycine max]		Glyma13g41930	93.76	45.28	-1.0501	gi|255632462|gb|ACU16581.1|/8.76331e-68/unknown [Glycine max]		Glyma03g30620	0.01	3.49	8.44708	gi|255637128|gb|ACU18895.1|/6.27454e-81/unknown [Glycine max]		Glyma03g40860	9.83	1.05	-3.2268	gi|255637828|gb|ACU19234.1|/1.43109e-133/unknown [Glycine max]		Glyma16g32430	0.01	6.7	9.38802	gi|217074978|gb|ACJ85849.1|/1.06924e-07/unknown [Medicago truncatula]		Glyma13g19950	43.81	21.7	-1.01357	gi|255625679|gb|ACU13184.1|/5.92494e-111/unknown [Glycine max]
Glyma12g12800	0.01	5.18	9.01681	gi|255643584|gb|ACU22682.1|/8.26665e-169/unknown [Glycine max]		Glyma11g37360	175.12	0.33	-9.05166	gi|255638912|gb|ACU19758.1|/8.51144e-174/unknown [Glycine max]		Glyma12g36750	0.01	2.79	8.12412	gi|255647793|gb|ACU24357.1|/2.19926e-129/unknown [Glycine max]		Glyma12g07040	48.7	23.51	-1.05065	gi|255626827|gb|ACU13758.1|/1.81478e-46/unknown [Glycine max]		Glyma18g49210	0.01	3.31	8.37069	gi|255634520|gb|ACU17623.1|/0/unknown [Glycine max]		Glyma06g16810	44.94	4.88	-3.20305	gi|255640774|gb|ACU20671.1|/7.19294e-25/unknown [Glycine max]		Glyma18g45920	0.01	6	9.22882	gi|255629968|gb|ACU15336.1|/2.4628e-23/unknown [Glycine max]		Glyma06g44510	22.87	11.29	-1.01841	gi|255636069|gb|ACU18379.1|/0/unknown [Glycine max]
Glyma09g07560	0.01	5.01	8.96867	gi|255647293|gb|ACU24113.1|/1.44173e-73/unknown [Glycine max]		Glyma14g23910	5.26	0.01	-9.03892	gi|255641168|gb|ACU20861.1|/5.06631e-15/unknown [Glycine max]		Glyma16g26050	0.01	2.79	8.12412	gi|255632608|gb|ACU16654.1|/5.01329e-143/unknown [Glycine max]		Glyma16g22060	126.29	60.96	-1.05081	gi|255628371|gb|ACU14530.1|/3.41163e-33/unknown [Glycine max]		Glyma03g38880	0.01	3.31	8.37069	gi|255647297|gb|ACU24115.1|/2.22028e-54/unknown [Glycine max]		Glyma08g42800	25.47	2.79	-3.19046	gi|255632622|gb|ACU16661.1|/2.69686e-30/unknown [Glycine max]		Glyma05g32520	0.01	5.82	9.18488	gi|255639535|gb|ACU20062.1|/8.0255e-116/unknown [Glycine max]		Glyma06g46180	27.62	13.59	-1.02317	gi|255632256|gb|ACU16486.1|/3.23453e-117/unknown [Glycine max]
Glyma08g07960	0.01	5.01	8.96867	gi|255647785|gb|ACU24353.1|/2.11089e-173/unknown [Glycine max]		Glyma08g30350	4.91	0.01	-8.93958	gi|255317084|gb|ACU01861.1|/6.88731e-157/unknown protein [Glycine max]		Glyma15g09210	0.01	2.61	8.02791	gi|255645392|gb|ACU23192.1|/9.23976e-108/unknown [Glycine max]		Glyma02g36820	523.7	251.66	-1.05726	gi|255625911|gb|ACU13300.1|/1.0308e-55/unknown [Glycine max]		Glyma17g12340	0.01	3.14	8.29462	gi|217073762|gb|ACJ85241.1|/3.98603e-124/unknown [Medicago truncatula]		Glyma08g40330	7.82	0.87	-3.16808	gi|255627003|gb|ACU13846.1|/1.00565e-95/unknown [Glycine max]		Glyma07g16690	0.01	5.29	9.04712	gi|255631730|gb|ACU16232.1|/3.85625e-59/unknown [Glycine max]		Glyma12g07070	18.3	9	-1.02385	gi|255641310|gb|ACU20932.1|/2.47517e-86/unknown [Glycine max]
Glyma08g45490	0.01	4.34	8.76155	gi|255625877|gb|ACU13283.1|/1.42264e-104/unknown [Glycine max]		Glyma16g15590	4.91	0.01	-8.93958	gi|255642337|gb|ACU21433.1|/1.92783e-32/unknown [Glycine max]		Glyma20g00590	0.01	2.61	8.02791	gi|255644680|gb|ACU22842.1|/0/unknown [Glycine max]		Glyma17g07040	25.8	12.37	-1.06053	gi|255642253|gb|ACU21391.1|/0/unknown [Glycine max]		Glyma03g30220	0.01	3.14	8.29462	gi|255640849|gb|ACU20707.1|/4.81769e-109/unknown [Glycine max]		Glyma20g23510	7.82	0.87	-3.16808	gi|255648097|gb|ACU24503.1|/3.77823e-96/unknown [Glycine max]		Glyma16g00520	0.01	5.29	9.04712	gi|255626591|gb|ACU13640.1|/1.62423e-80/unknown [Glycine max]		Glyma06g14140	17.59	8.65	-1.02398	gi|255634767|gb|ACU17745.1|/1.30946e-98/unknown [Glycine max]
Glyma05g04430	0.01	4.34	8.76155	gi|255626023|gb|ACU13356.1|/5.13364e-30/unknown [Glycine max]		Glyma06g05490	4.73	0.01	-8.8857	gi|255638904|gb|ACU19754.1|/1.88311e-77/unknown [Glycine max]		Glyma20g29790	0.01	2.61	8.02791	gi|255626355|gb|ACU13522.1|/1.38678e-112/unknown [Glycine max]		Glyma13g04940	85.77	40.93	-1.06731	gi|255637501|gb|ACU19077.1|/0/unknown [Glycine max]		Glyma18g06480	0.01	3.14	8.29462	gi|217074526|gb|ACJ85623.1|/1.54426e-136/unknown [Medicago truncatula]		Glyma06g16990	6	0.7	-3.09954	gi|255633496|gb|ACU17106.1|/7.04486e-38/unknown [Glycine max]		Glyma17g17790	0.01	5.29	9.04712	gi|255638871|gb|ACU19738.1|/0/unknown [Glycine max]		Glyma03g25820	27.27	13.41	-1.02401	gi|255627809|gb|ACU14249.1|/4.09756e-78/unknown [Glycine max]
Glyma03g30620	0.01	4.01	8.64746	gi|255637128|gb|ACU18895.1|/6.27454e-81/unknown [Glycine max]		Glyma07g35830	4.21	0.01	-8.71768	gi|255647628|gb|ACU24277.1|/6.48e-13/unknown [Glycine max]		Glyma05g04490	1.27	78.37	5.9474	gi|255625839|gb|ACU13264.1|/2.21289e-47/unknown [Glycine max]		Glyma05g08240	276.75	131.84	-1.0698	gi|255627965|gb|ACU14327.1|/1.1472e-55/unknown [Glycine max]		Glyma09g03940	0.01	2.96	8.20945	gi|255626731|gb|ACU13710.1|/1.13383e-29/unknown [Glycine max]		Glyma07g08300	4.18	0.52	-3.00692	gi|255638782|gb|ACU19695.1|/3.03808e-13/unknown [Glycine max]		Glyma05g37370	0.01	4.94	8.94837	gi|255639549|gb|ACU20069.1|/0/unknown [Glycine max]		Glyma04g17650	26.21	12.88	-1.02498	gi|255630988|gb|ACU15858.1|/2.51432e-67/unknown [Glycine max]
Glyma07g05770	0.01	4.01	8.64746	gi|255637197|gb|ACU18929.1|/3.46179e-54/unknown [Glycine max]		Glyma04g04780	4.21	0.01	-8.71768	gi|289540904|gb|ADD09578.1|/0/unknown [Trifolium repens]		Glyma18g50500	1.82	41.28	4.50343	gi|255630665|gb|ACU15692.1|/4.50345e-54/unknown [Glycine max]		Glyma10g30560	111.75	53.12	-1.07295	gi|255642169|gb|ACU21349.1|/9.94449e-22/unknown [Glycine max]		Glyma02g12450	0.01	2.96	8.20945	gi|255627579|gb|ACU14134.1|/6.7002e-77/unknown [Glycine max]		Glyma16g29930	8.19	1.05	-2.96347	gi|217073077|gb|ACJ84898.1|/2.9987e-64/unknown [Medicago truncatula]		Glyma13g23990	0.01	4.94	8.94837	gi|255631690|gb|ACU16212.1|/1.40348e-94/unknown [Glycine max]		Glyma19g39500	33.78	16.59	-1.02586	gi|255641250|gb|ACU20902.1|/1.38426e-145/unknown [Glycine max]
Glyma15g06740	0.01	4.01	8.64746	gi|255637215|gb|ACU18938.1|/6.72077e-110/unknown [Glycine max]		Glyma03g11670	4.21	0.01	-8.71768	gi|255627811|gb|ACU14250.1|/3.01772e-70/unknown [Glycine max]		Glyma01g43070	0.36	6.27	4.1224	gi|255633876|gb|ACU17299.1|/1.41596e-42/unknown [Glycine max]		Glyma19g03530	37.43	17.76	-1.07556	gi|255645677|gb|ACU23332.1|/1.21079e-108/unknown [Glycine max]		Glyma02g47120	0.01	2.96	8.20945	gi|255639043|gb|ACU19822.1|/2.96536e-154/unknown [Glycine max]		Glyma04g39370	13.46	1.74	-2.95152	gi|255626111|gb|ACU13400.1|/3.60402e-53/unknown [Glycine max]		Glyma12g08490	0.01	4.23	8.72451	gi|217072520|gb|ACJ84620.1|/3.74602e-129/unknown [Medicago truncatula]		Glyma10g36170	16.54	8.12	-1.02641	gi|255638169|gb|ACU19398.1|/0/unknown [Glycine max]
Glyma05g37370	0.01	3.84	8.58496	gi|255639549|gb|ACU20069.1|/0/unknown [Glycine max]		Glyma11g20820	4.03	0.01	-8.65464	gi|255646140|gb|ACU23556.1|/1.00973e-78/unknown [Glycine max]		Glyma08g13510	0.73	12.71	4.12192	gi|255627075|gb|ACU13882.1|/8.81128e-66/unknown [Glycine max]		Glyma07g15190	73.41	34.83	-1.07565	gi|217071828|gb|ACJ84274.1|/2.3828e-141/unknown [Medicago truncatula]		Glyma13g01490	0.01	2.61	8.02791	gi|255644778|gb|ACU22891.1|/7.31797e-130/unknown [Glycine max]		Glyma07g27310	3.82	0.52	-2.87699	gi|255573206|ref|XP_002527532.1|/3.51404e-38/protein with unknown function [Ricinus communis]		Glyma01g31730	0.01	4.06	8.66534	gi|255630445|gb|ACU15580.1|/5.80919e-53/unknown [Glycine max]		Glyma08g05610	153.94	75.52	-1.02744	gi|255645048|gb|ACU23023.1|/3.99631e-162/unknown [Glycine max]
Glyma05g36750	0.01	3.51	8.45533	gi|255626145|gb|ACU13417.1|/1.80992e-71/unknown [Glycine max]		Glyma03g03720	3.86	0.01	-8.59246	gi|255636834|gb|ACU18750.1|/0/unknown [Glycine max]		Glyma07g04820	4.91	83.6	4.08971	gi|255639074|gb|ACU19837.1|/5.68259e-62/unknown [Glycine max]		Glyma06g31120	52.15	24.73	-1.07641	gi|255626621|gb|ACU13655.1|/1.47258e-97/unknown [Glycine max]		Glyma04g40650	0.01	2.61	8.02791	gi|255634767|gb|ACU17745.1|/4.39828e-152/unknown [Glycine max]		Glyma02g36140	5.09	0.7	-2.86224	gi|255627991|gb|ACU14340.1|/2.15754e-70/unknown [Glycine max]		Glyma12g00970	0.01	4.06	8.66534	gi|255632717|gb|ACU16710.1|/8.89113e-41/unknown [Glycine max]		Glyma16g03230	828.31	406.17	-1.02809	gi|255625961|gb|ACU13325.1|/2.36534e-70/unknown [Glycine max]
Glyma14g08090	0.01	3.17	8.30834	gi|255642112|gb|ACU21322.1|/2.53497e-20/unknown [Glycine max]		Glyma14g38300	3.33	0.01	-8.37938	gi|116786286|gb|ABK24052.1|/2.97155e-17/unknown [Picea sitchensis]		Glyma09g37290	1.09	15.85	3.86208	gi|255628445|gb|ACU14567.1|/1.21241e-40/unknown [Glycine max]		Glyma19g44680	16.9	8.01	-1.07715	gi|255638656|gb|ACU19633.1|/3.96368e-152/unknown [Glycine max]		Glyma04g07060	0.01	2.44	7.93074	gi|255646435|gb|ACU23696.1|/2.95699e-161/unknown [Glycine max]		Glyma11g13130	10.01	1.39	-2.84829	gi|255637675|gb|ACU19161.1|/1.26524e-32/unknown [Glycine max]		Glyma14g21190	0.01	4.06	8.66534	gi|255636576|gb|ACU18626.1|/3.10196e-111/unknown [Glycine max]		Glyma01g42950	15.48	7.59	-1.02823	gi|255642831|gb|ACU22115.1|/2.83181e-162/unknown [Glycine max]
Glyma0466s00200	0.01	3.01	8.23362	gi|255641695|gb|ACU21119.1|/3.08981e-110/unknown [Glycine max]		Glyma15g35680	3.16	0.01	-8.30378	gi|20197614|gb|AAM15154.1|/2.16653e-21/unknown protein [Arabidopsis thaliana]		Glyma15g12100	0.36	5.05	3.81021	gi|255641490|gb|ACU21020.1|/0/unknown [Glycine max]		Glyma06g08540	57.97	27.34	-1.08429	gi|255642419|gb|ACU21473.1|/1.14986e-162/unknown [Glycine max]		Glyma10g06990	0.01	2.44	7.93074	gi|255646513|gb|ACU23734.1|/2.43487e-111/unknown [Glycine max]		Glyma14g04720	9.64	1.39	-2.79395	gi|255637808|gb|ACU19225.1|/5.62849e-28/unknown [Glycine max]		Glyma08g12570	0.01	3.88	8.59991	gi|255631185|gb|ACU15958.1|/4.05358e-117/unknown [Glycine max]		Glyma08g11710	15.48	7.59	-1.02823	gi|255635594|gb|ACU18147.1|/0/unknown [Glycine max]
Glyma02g45240	0.01	3.01	8.23362	gi|255636574|gb|ACU18625.1|/1.35314e-147/unknown [Glycine max]		Glyma11g03150	2.98	0.01	-8.21917	gi|255640362|gb|ACU20469.1|/2.71108e-17/unknown [Glycine max]		Glyma11g34380	6.91	94.22	3.76928	gi|255632780|gb|ACU16743.1|/5.83571e-146/unknown [Glycine max]		Glyma20g01930	22.17	10.45	-1.08511	gi|255629746|gb|ACU15222.1|/7.21171e-74/unknown [Glycine max]		Glyma02g02350	0.01	2.44	7.93074	gi|255627213|gb|ACU13951.1|/1.78185e-121/unknown [Glycine max]		Glyma03g11670	6	0.87	-2.78588	gi|255627811|gb|ACU14250.1|/3.01772e-70/unknown [Glycine max]		Glyma12g24910	0.01	3.71	8.53528	gi|255633452|gb|ACU17084.1|/8.4522e-65/unknown [Glycine max]		Glyma01g39370	38.18	18.7	-1.02978	gi|255632191|gb|ACU16454.1|/2.04296e-56/unknown [Glycine max]
Glyma18g14410	0.01	2.67	8.0607	gi|255635846|gb|ACU18270.1|/2.0024e-147/unknown [Glycine max]		Glyma03g03830	2.63	0.01	-8.03892	gi|255642321|gb|ACU21425.1|/0/unknown [Glycine max]		Glyma02g46150	0.36	4.88	3.76081	gi|255632420|gb|ACU16560.1|/1.49446e-106/unknown [Glycine max]		Glyma06g07060	19.26	9.06	-1.08802	gi|255631195|gb|ACU15963.1|/2.22697e-24/unknown [Glycine max]		Glyma02g40030	0.01	2.44	7.93074	gi|255627133|gb|ACU13911.1|/3.57599e-68/unknown [Glycine max]		Glyma07g34380	21.47	3.14	-2.77349	gi|255632502|gb|ACU16601.1|/2.14829e-49/unknown [Glycine max]		Glyma15g00830	0.01	3.71	8.53528	gi|255648224|gb|ACU24565.1|/2.5268e-79/unknown [Glycine max]		Glyma03g04950	187.37	91.75	-1.03011	gi|255640474|gb|ACU20523.1|/1.4748e-30/unknown [Glycine max]
Glyma06g38160	0.01	2.67	8.0607	gi|255646733|gb|ACU23840.1|/0/unknown [Glycine max]		Glyma20g32180	2.63	0.01	-8.03892	gi|255631854|gb|ACU16294.1|/3.38057e-99/unknown [Glycine max]		Glyma18g40690	0.36	4.88	3.76081	gi|255634877|gb|ACU17797.1|/2.45044e-156/unknown [Glycine max]		Glyma18g52310	18.17	8.53	-1.09094	gi|255633118|gb|ACU16914.1|/3.6691e-63/unknown [Glycine max]		Glyma12g30800	2	171.7	6.42375	gi|255628041|gb|ACU14365.1|/1.48165e-14/unknown [Glycine max]		Glyma20g21200	20.2	2.96	-2.77069	gi|255639364|gb|ACU19978.1|/3.99925e-169/unknown [Glycine max]		Glyma06g36910	0.01	3.53	8.46352	gi|255640832|gb|ACU20699.1|/2.33685e-58/unknown [Glycine max]		Glyma08g05730	118.93	58.23	-1.03028	gi|255638390|gb|ACU19506.1|/4.86292e-127/unknown [Glycine max]
Glyma13g20960	0.01	2.67	8.0607	gi|255632580|gb|ACU16640.1|/2.32719e-94/unknown [Glycine max]		Glyma16g01820	2.28	0.01	-7.83289	gi|255639875|gb|ACU20230.1|/4.81345e-110/unknown [Glycine max]		Glyma10g39610	1.64	21.42	3.70719	gi|255639291|gb|ACU19943.1|/0/unknown [Glycine max]		Glyma08g13090	17.08	8.01	-1.09243	gi|255626301|gb|ACU13495.1|/2.54428e-95/unknown [Glycine max]		Glyma06g08860	0.36	15.69	5.4457	gi|255645394|gb|ACU23193.1|/0/unknown [Glycine max]		Glyma14g00310	14.01	2.09	-2.74488	gi|255629377|gb|ACU15033.1|/2.60486e-38/unknown [Glycine max]		Glyma17g34650	0.01	3.18	8.31288	gi|255646921|gb|ACU23930.1|/0/unknown [Glycine max]		Glyma04g02650	50.49	24.7	-1.03149	gi|255641262|gb|ACU20908.1|/3.50366e-126/unknown [Glycine max]
Glyma10g38910	0.01	2.51	7.97154	gi|255628341|gb|ACU14515.1|/5.72424e-75/unknown [Glycine max]		Glyma15g15610	2.28	0.01	-7.83289	gi|255626829|gb|ACU13759.1|/5.42628e-67/unknown [Glycine max]		Glyma09g37150	1.09	14.11	3.69432	gi|255637487|gb|ACU19070.1|/4.35358e-113/unknown [Glycine max]		Glyma13g27840	336.72	157.79	-1.09354	gi|255647537|gb|ACU24232.1|/0/unknown [Glycine max]		Glyma05g04490	6.73	169.96	4.65844	gi|255625839|gb|ACU13264.1|/2.21289e-47/unknown [Glycine max]		Glyma10g43300	5.82	0.87	-2.74193	gi|255648097|gb|ACU24503.1|/5.47022e-102/unknown [Glycine max]		Glyma08g22610	0.01	3	8.22882	gi|255626109|gb|ACU13399.1|/5.91863e-46/unknown [Glycine max]		Glyma12g16250	139.69	68.28	-1.03269	gi|255631820|gb|ACU16277.1|/1.92683e-50/unknown [Glycine max]
Glyma09g11740	0.01	2.51	7.97154	gi|255638122|gb|ACU19375.1|/8.23099e-169/unknown [Glycine max]		Glyma10g05100	51.89	0.33	-7.29685	gi|255635165|gb|ACU17939.1|/2.06436e-42/unknown [Glycine max]		Glyma18g46540	0.91	11.67	3.68079	gi|255636132|gb|ACU18409.1|/1.35619e-142/unknown [Glycine max]		Glyma13g27050	69.05	32.22	-1.09968	gi|255645920|gb|ACU23449.1|/6.71826e-33/unknown [Glycine max]		Glyma03g39930	0.55	13.42	4.60881	gi|255629127|gb|ACU14908.1|/1.78893e-93/unknown [Glycine max]		Glyma02g02050	12.19	1.92	-2.66652	gi|255630258|gb|ACU15484.1|/8.2865e-87/unknown [Glycine max]		Glyma17g11690	0.01	3	8.22882	gi|255639064|gb|ACU19832.1|/0/unknown [Glycine max]		Glyma03g42050	216.05	105.51	-1.03399	gi|255638086|gb|ACU19357.1|/9.88394e-134/unknown [Glycine max]
Glyma18g49210	0.01	2.51	7.97154	gi|255634520|gb|ACU17623.1|/0/unknown [Glycine max]		Glyma18g48070	204.57	2.84	-6.17056	gi|255647714|gb|ACU24318.1|/8.01302e-168/unknown [Glycine max]		Glyma18g49540	1.27	16.2	3.67309	gi|255637487|gb|ACU19070.1|/3.77003e-90/unknown [Glycine max]		Glyma15g09700	26.89	12.54	-1.10053	gi|255642503|gb|ACU21515.1|/0/unknown [Glycine max]		Glyma08g12570	0.36	5.58	3.9542	gi|255631185|gb|ACU15958.1|/4.05358e-117/unknown [Glycine max]		Glyma16g27690	4.37	0.7	-2.64221	gi|255646254|gb|ACU23611.1|/2.41061e-115/unknown [Glycine max]		Glyma07g00960	0.01	2.82	8.13955	gi|255626537|gb|ACU13613.1|/1.03162e-35/unknown [Glycine max]		Glyma04g40860	26.04	12.7	-1.0359	gi|255629841|gb|ACU15271.1|/3.35895e-16/unknown [Glycine max]
Glyma14g39940	0.01	2.51	7.97154	gi|255646899|gb|ACU23919.1|/4.29461e-152/unknown [Glycine max]		Glyma20g21200	21.21	0.33	-6.00613	gi|255639364|gb|ACU19978.1|/3.99925e-169/unknown [Glycine max]		Glyma06g01550	0.91	11.49	3.65837	gi|255637445|gb|ACU19050.1|/8.17701e-36/unknown [Glycine max]		Glyma12g30600	30.35	14.11	-1.10498	gi|255644846|gb|ACU22923.1|/4.19878e-114/unknown [Glycine max]		Glyma06g14880	0.55	8.19	3.89636	gi|255630629|gb|ACU15674.1|/1.06235e-64/unknown [Glycine max]		Glyma06g21170	5.28	0.87	-2.60145	gi|255639261|gb|ACU19929.1|/1.31278e-163/unknown [Glycine max]		Glyma14g04440	0.01	2.82	8.13955	gi|255645879|gb|ACU23429.1|/5.63294e-130/unknown [Glycine max]		Glyma10g40810	26.04	12.7	-1.0359	gi|255641354|gb|ACU20954.1|/4.49591e-128/unknown [Glycine max]
Glyma01g40810	0.01	2.34	7.87036	gi|255629191|gb|ACU14940.1|/1.88579e-85/unknown [Glycine max]		Glyma06g01540	14.02	0.33	-5.40888	gi|255632657|gb|ACU16680.1|/1.4573e-130/unknown [Glycine max]		Glyma02g42990	0.36	4.53	3.65344	gi|217075076|gb|ACJ85898.1|/8.35793e-78/unknown [Medicago truncatula]		Glyma20g34120	15.08	6.97	-1.11341	gi|217072324|gb|ACJ84522.1|/1.70953e-95/unknown [Medicago truncatula]		Glyma19g40400	1.09	15.86	3.86299	gi|255640384|gb|ACU20479.1|/3.80689e-60/unknown [Glycine max]		Glyma08g00640	5.28	0.87	-2.60145	gi|255628871|gb|ACU14780.1|/1.60719e-34/unknown [Glycine max]		Glyma02g04250	0.01	2.65	8.04985	gi|255637998|gb|ACU19315.1|/0/unknown [Glycine max]		Glyma07g28020	23.58	11.47	-1.0397	gi|217072976|gb|ACJ84848.1|/4.63579e-108/unknown [Medicago truncatula]
Glyma07g17180	0.01	2.34	7.87036	gi|255640681|gb|ACU20625.1|/0/unknown [Glycine max]		Glyma18g50530	31.03	0.84	-5.20713	gi|255630665|gb|ACU15692.1|/6.2436e-53/unknown [Glycine max]		Glyma12g35400	1.09	12.89	3.56385	gi|255637362|gb|ACU19010.1|/0/unknown [Glycine max]		Glyma10g41300	45.25	20.9	-1.11441	gi|255647854|gb|ACU24386.1|/2.01214e-26/unknown [Glycine max]		Glyma17g34420	0.91	12.55	3.78568	gi|255629347|gb|ACU15018.1|/1.02014e-82/unknown [Glycine max]		Glyma12g32070	6.37	1.05	-2.6009	gi|255627895|gb|ACU14292.1|/2.99208e-91/unknown [Glycine max]		Glyma15g41840	0.01	2.65	8.04985	gi|255646754|gb|ACU23850.1|/0/unknown [Glycine max]		Glyma11g08350	35.19	17.11	-1.04033	gi|255641607|gb|ACU21076.1|/0/unknown [Glycine max]
Glyma14g03800	0.53	46.61	6.4585	gi|255640869|gb|ACU20717.1|/1.01261e-77/unknown [Glycine max]		Glyma20g32000	310.63	8.52	-5.1882	gi|255648055|gb|ACU24483.1|/4.02231e-161/unknown [Glycine max]		Glyma13g43410	0.73	7.31	3.3239	gi|255640650|gb|ACU20610.1|/7.42758e-50/unknown [Glycine max]		Glyma16g01240	14.36	6.62	-1.11715	gi|255645496|gb|ACU23243.1|/8.58896e-168/unknown [Glycine max]		Glyma02g45190	1.09	13.6	3.64121	gi|255646390|gb|ACU23674.1|/7.17243e-133/unknown [Glycine max]		Glyma03g28490	14.74	2.44	-2.59478	gi|255639335|gb|ACU19965.1|/8.10878e-165/unknown [Glycine max]		Glyma19g45170	0.01	2.65	8.04985	gi|255626781|gb|ACU13735.1|/1.40387e-68/unknown [Glycine max]		Glyma08g13320	16.71	8.12	-1.04116	gi|255635977|gb|ACU18334.1|/0/unknown [Glycine max]
Glyma01g01460	0.88	36.59	5.3778	gi|255642108|gb|ACU21320.1|/0/unknown [Glycine max]		Glyma12g07370	11.22	0.33	-5.08746	gi|255646140|gb|ACU23556.1|/6.49406e-101/unknown [Glycine max]		Glyma02g44360	0.73	7.14	3.28996	gi|255633388|gb|ACU17051.1|/1.08641e-124/unknown [Glycine max]		Glyma01g36880	23.8	10.97	-1.1174	gi|255638576|gb|ACU19595.1|/7.64408e-99/unknown [Glycine max]		Glyma19g43450	9.46	108.95	3.52568	gi|255638621|gb|ACU19616.1|/1.23401e-111/unknown [Glycine max]		Glyma02g04080	56.58	9.41	-2.58803	gi|255631340|gb|ACU16037.1|/3.43625e-36/unknown [Glycine max]		Glyma01g01930	0.01	2.47	7.94837	gi|255630212|gb|ACU15461.1|/1.33054e-93/unknown [Glycine max]		Glyma02g36230	27.97	13.59	-1.04133	gi|255629764|gb|ACU15231.1|/2.36773e-103/unknown [Glycine max]
Glyma17g14880	3.33	86.71	4.7026	gi|255629379|gb|ACU15034.1|/4.40875e-31/unknown [Glycine max]		Glyma02g45970	21.04	0.67	-4.97283	gi|255647172|gb|ACU24054.1|/0/unknown [Glycine max]		Glyma13g27820	0.55	5.22	3.24655	gi|217069992|gb|ACJ83356.1|/4.2551e-58/unknown [Medicago truncatula]		Glyma11g37820	17.81	8.19	-1.12075	gi|255634863|gb|ACU17790.1|/0/unknown [Glycine max]		Glyma01g01370	0.91	9.59	3.39759	gi|255646270|gb|ACU23619.1|/0/unknown [Glycine max]		Glyma10g04190	20.92	3.49	-2.58358	gi|255640285|gb|ACU20432.1|/1.03584e-68/unknown [Glycine max]		Glyma05g36750	0.01	2.47	7.94837	gi|255626145|gb|ACU13417.1|/1.80992e-71/unknown [Glycine max]		Glyma16g34570	512.85	248.96	-1.04262	gi|255646947|gb|ACU23943.1|/0/unknown [Glycine max]
Glyma04g37630	1.93	42.27	4.45296	gi|118483184|gb|ABK93496.1|/0/unknown [Populus trichocarpa]		Glyma17g19920	18.58	0.67	-4.79345	gi|255648036|gb|ACU24474.1|/1.69035e-164/unknown [Glycine max]		Glyma12g35070	0.73	6.79	3.21744	gi|255642311|gb|ACU21420.1|/1.48733e-139/unknown [Glycine max]		Glyma07g31530	12.9	5.92	-1.1237	gi|255629573|gb|ACU15134.1|/8.40907e-70/unknown [Glycine max]		Glyma18g14410	0.73	7.67	3.39326	gi|255635846|gb|ACU18270.1|/2.0024e-147/unknown [Glycine max]		Glyma18g03730	86.42	14.99	-2.52736	gi|255647486|gb|ACU24207.1|/6.84278e-46/unknown [Glycine max]		Glyma08g15350	0.01	2.47	7.94837	gi|255639269|gb|ACU19933.1|/1.0164e-101/unknown [Glycine max]		Glyma13g18950	87.62	42.52	-1.04312	gi|255645431|gb|ACU23211.1|/0/unknown [Glycine max]
Glyma06g47760	1.58	24.73	3.96827	gi|289540917|gb|ADD09589.1|/1.53955e-75/unknown [Trifolium repens]		Glyma05g03890	17.88	0.67	-4.73804	gi|255639123|gb|ACU19861.1|/0/unknown [Glycine max]		Glyma19g42720	10.18	94.57	3.21565	gi|255625645|gb|ACU13167.1|/3.94038e-61/unknown [Glycine max]		Glyma19g35630	37.98	17.42	-1.1245	gi|217071888|gb|ACJ84304.1|/8.79751e-151/unknown [Medicago truncatula]		Glyma01g01460	2.73	27.72	3.34395	gi|255642108|gb|ACU21320.1|/0/unknown [Glycine max]		Glyma18g46330	74.96	13.07	-2.51986	gi|255629121|gb|ACU14905.1|/8.47886e-38/unknown [Glycine max]		Glyma11g15450	0.01	2.47	7.94837	gi|255637896|gb|ACU19266.1|/1.92788e-86/unknown [Glycine max]		Glyma12g35970	27.27	13.23	-1.0435	gi|255646959|gb|ACU23949.1|/2.35425e-118/unknown [Glycine max]
Glyma09g01220	0.53	8.19	3.9498	gi|255632254|gb|ACU16485.1|/9.31196e-79/unknown [Glycine max]		Glyma13g43250	12.8	0.5	-4.67807	gi|255637914|gb|ACU19274.1|/1.12871e-115/unknown [Glycine max]		Glyma15g20970	2	18.29	3.19298	gi|255625685|gb|ACU13187.1|/6.4965e-100/unknown [Glycine max]		Glyma06g14350	19.08	8.71	-1.13132	gi|255645127|gb|ACU23062.1|/9.35456e-105/unknown [Glycine max]		Glyma06g14640	0.55	5.58	3.34276	gi|255636352|gb|ACU18515.1|/7.16651e-122/unknown [Glycine max]		Glyma20g04830	6	1.05	-2.51457	gi|255631890|gb|ACU16312.1|/1.50845e-141/unknown [Glycine max]		Glyma20g21130	0.01	2.47	7.94837	gi|255637905|gb|ACU19270.1|/1.33001e-149/unknown [Glycine max]		Glyma18g47600	85.86	41.64	-1.04402	gi|255638918|gb|ACU19761.1|/0/unknown [Glycine max]
Glyma06g02100	0.35	5.35	3.93411	gi|255641632|gb|ACU21088.1|/1.47853e-137/unknown [Glycine max]		Glyma10g00870	6.14	0.33	-4.2177	gi|255646455|gb|ACU23706.1|/5.4342e-109/unknown [Glycine max]		Glyma15g11800	3.09	28.04	3.18181	gi|255640618|gb|ACU20594.1|/8.77351e-95/unknown [Glycine max]		Glyma08g29470	14.9	6.79	-1.13383	gi|255644542|gb|ACU22774.1|/0/unknown [Glycine max]		Glyma03g42050	0.91	8.72	3.26039	gi|255638086|gb|ACU19357.1|/9.88394e-134/unknown [Glycine max]		Glyma20g06680	53.67	9.41	-2.51185	gi|255648121|gb|ACU24515.1|/4.54617e-100/unknown [Glycine max]		Glyma02g02800	0.01	2.29	7.8392	gi|255642333|gb|ACU21431.1|/7.96137e-138/unknown [Glycine max]		Glyma03g41040	26.57	12.88	-1.04467	gi|255640213|gb|ACU20397.1|/9.43989e-167/unknown [Glycine max]
Glyma15g08680	0.35	5.01	3.83938	gi|255637781|gb|ACU19212.1|/0/unknown [Glycine max]		Glyma04g39370	9.12	0.5	-4.18903	gi|255626111|gb|ACU13400.1|/3.60402e-53/unknown [Glycine max]		Glyma03g39330	0.55	4.88	3.14938	gi|217072450|gb|ACJ84585.1|/8.29958e-97/unknown [Medicago truncatula]		Glyma14g03380	53.97	24.56	-1.13585	gi|255631354|gb|ACU16044.1|/5.08014e-97/unknown [Glycine max]		Glyma05g04430	0.55	5.23	3.24931	gi|255626023|gb|ACU13356.1|/5.13364e-30/unknown [Glycine max]		Glyma19g34660	8.92	1.57	-2.50628	gi|255639562|gb|ACU20075.1|/1.33906e-42/unknown [Glycine max]		Glyma07g30570	0.01	2.29	7.8392	gi|255636709|gb|ACU18690.1|/0/unknown [Glycine max]		Glyma06g36590	16.01	7.76	-1.04484	gi|255645421|gb|ACU23206.1|/1.76731e-69/unknown [Glycine max]
Glyma08g20820	0.88	11.36	3.69032	gi|255641141|gb|ACU20848.1|/1.05652e-152/unknown [Glycine max]		Glyma05g29430	13.15	0.84	-3.96853	gi|255646363|gb|ACU23661.1|/1.63991e-83/unknown [Glycine max]		Glyma05g32520	0.73	6.44	3.14109	gi|255639535|gb|ACU20062.1|/8.0255e-116/unknown [Glycine max]		Glyma13g32920	537.15	241.73	-1.15193	gi|255637146|gb|ACU18904.1|/4.05788e-140/unknown [Glycine max]		Glyma06g42340	1.09	9.41	3.10987	gi|255638326|gb|ACU19475.1|/1.18111e-168/unknown [Glycine max]		Glyma12g05760	113.35	20.05	-2.49911	gi|255627033|gb|ACU13861.1|/2.38188e-47/unknown [Glycine max]		Glyma13g05240	0.01	2.29	7.8392	gi|255641565|gb|ACU21056.1|/0/unknown [Glycine max]		Glyma19g32910	16.01	7.76	-1.04484	gi|255636900|gb|ACU18783.1|/7.34894e-174/unknown [Glycine max]
Glyma05g36100	18.58	237.24	3.67452	gi|255644784|gb|ACU22894.1|/0/unknown [Glycine max]		Glyma03g28490	4.56	0.33	-3.7885	gi|255639335|gb|ACU19965.1|/8.10878e-165/unknown [Glycine max]		Glyma02g09780	0.55	4.7	3.09516	gi|255628443|gb|ACU14566.1|/1.64698e-29/unknown [Glycine max]		Glyma11g05160	83.23	37.44	-1.15252	gi|255640610|gb|ACU20590.1|/5.61749e-59/unknown [Glycine max]		Glyma06g47760	1.82	14.29	2.973	gi|289540917|gb|ADD09589.1|/1.53955e-75/unknown [Trifolium repens]		Glyma03g27050	4.91	0.87	-2.49664	gi|255647266|gb|ACU24100.1|/1.45116e-131/unknown [Glycine max]		Glyma16g01710	0.01	2.29	7.8392	gi|255630157|gb|ACU15432.1|/1.26646e-80/unknown [Glycine max]		Glyma03g37190	92.89	44.99	-1.04592	gi|255627059|gb|ACU13874.1|/3.40331e-45/unknown [Glycine max]
Glyma12g09810	2.8	34.75	3.63351	gi|255635922|gb|ACU18308.1|/3.94203e-145/unknown [Glycine max]		Glyma11g05660	6.66	0.5	-3.73552	gi|255635694|gb|ACU18196.1|/8.20446e-154/unknown [Glycine max]		Glyma13g01310	0.55	4.7	3.09516	gi|255628213|gb|ACU14451.1|/1.30262e-51/unknown [Glycine max]		Glyma05g35220	13.99	6.27	-1.15786	gi|255631022|gb|ACU15875.1|/4.25664e-111/unknown [Glycine max]		Glyma11g18640	0.73	5.58	2.9343	gi|255626509|gb|ACU13599.1|/2.26349e-62/unknown [Glycine max]		Glyma10g04210	4.91	0.87	-2.49664	gi|255639139|gb|ACU19869.1|/7.31492e-78/unknown [Glycine max]		Glyma18g40700	0.01	2.29	7.8392	gi|255634877|gb|ACU17797.1|/1.07857e-07/unknown [Glycine max]		Glyma11g37080	51.02	24.7	-1.04655	gi|255638498|gb|ACU19558.1|/4.4326e-122/unknown [Glycine max]
Glyma05g33390	0.7	8.35	3.57635	gi|255627899|gb|ACU14294.1|/1.70488e-68/unknown [Glycine max]		Glyma19g30290	4.21	0.33	-3.67328	gi|255647305|gb|ACU24119.1|/1.81367e-132/unknown [Glycine max]		Glyma11g10700	0.73	6.1	3.06284	gi|255644918|gb|ACU22959.1|/7.00036e-175/unknown [Glycine max]		Glyma17g17970	103.03	46.15	-1.15866	gi|255639301|gb|ACU19948.1|/8.03981e-08/unknown [Glycine max]		Glyma18g00310	0.55	4.18	2.926	gi|255647050|gb|ACU23993.1|/0/unknown [Glycine max]		Glyma17g24120	20.56	3.66	-2.48992	gi|255641533|gb|ACU21040.1|/4.32612e-163/unknown [Glycine max]		Glyma02g15430	0.35	72.69	7.69826	gi|255626091|gb|ACU13390.1|/4.97415e-115/unknown [Glycine max]		Glyma07g01540	136.7	66.17	-1.04676	gi|255627703|gb|ACU14196.1|/6.38717e-78/unknown [Glycine max]
Glyma02g47560	0.35	4.01	3.51818	gi|255635740|gb|ACU18219.1|/4.81914e-149/unknown [Glycine max]		Glyma20g23180	5.96	0.5	-3.57531	gi|255630006|gb|ACU15355.1|/7.49507e-73/unknown [Glycine max]		Glyma13g35480	4.72	39.19	3.05363	gi|255646509|gb|ACU23732.1|/4.42812e-139/unknown [Glycine max]		Glyma19g37500	205.88	92.13	-1.16006	gi|255640689|gb|ACU20629.1|/3.98252e-103/unknown [Glycine max]		Glyma01g02210	1.82	12.9	2.82536	gi|255627087|gb|ACU13888.1|/3.3946e-70/unknown [Glycine max]		Glyma04g33010	6.73	1.22	-2.46373	gi|255637640|gb|ACU19144.1|/1.66273e-155/unknown [Glycine max]		Glyma05g32040	0.35	34.94	6.64138	gi|255639269|gb|ACU19933.1|/3.92352e-85/unknown [Glycine max]		Glyma19g22270	44.86	21.7	-1.04773	gi|255627861|gb|ACU14275.1|/1.79994e-98/unknown [Glycine max]
Glyma11g09060	0.7	7.85	3.48727	gi|217072020|gb|ACJ84370.1|/2.15701e-146/unknown [Medicago truncatula]		Glyma09g02310	3.86	0.33	-3.54806	gi|255638090|gb|ACU19359.1|/1.146e-104/unknown [Glycine max]		Glyma07g38490	0.55	4.35	2.98351	gi|217074424|gb|ACJ85572.1|/0/unknown [Medicago truncatula]		Glyma09g12570	27.44	12.19	-1.17058	gi|255628167|gb|ACU14428.1|/1.40282e-23/unknown [Glycine max]		Glyma02g14460	1.27	8.89	2.80735	gi|255630107|gb|ACU15407.1|/9.41119e-13/unknown [Glycine max]		Glyma01g19820	22.93	4.18	-2.45566	gi|255645168|gb|ACU23082.1|/6.34839e-159/unknown [Glycine max]		Glyma19g27530	1.41	100.75	6.15894	gi|255635972|gb|ACU18332.1|/2.06359e-58/unknown [Glycine max]		Glyma08g05590	20.06	9.7	-1.04826	gi|255642441|gb|ACU21484.1|/8.80125e-111/unknown [Glycine max]
Glyma14g05010	2.28	25.06	3.45828	gi|255639399|gb|ACU19995.1|/1.77866e-172/unknown [Glycine max]		Glyma10g30340	80.99	7.02	-3.5282	gi|255630943|gb|ACU15834.1|/1.04766e-115/unknown [Glycine max]		Glyma18g50290	0.73	5.75	2.97759	gi|255639174|gb|ACU19886.1|/0/unknown [Glycine max]		Glyma07g05550	52.15	23.16	-1.17103	gi|118486324|gb|ABK95003.1|/0/unknown [Populus trichocarpa]		Glyma09g01650	6.73	46.89	2.8006	gi|255626163|gb|ACU13426.1|/1.57072e-72/unknown [Glycine max]		Glyma04g01530	9.46	1.74	-2.44275	gi|255638914|gb|ACU19759.1|/5.55244e-25/unknown [Glycine max]		Glyma04g16880	1.58	106.39	6.07329	gi|255628679|gb|ACU14684.1|/1.82582e-13/unknown [Glycine max]		Glyma06g39800	39.06	18.88	-1.04883	gi|217072604|gb|ACJ84662.1|/5.47945e-68/unknown [Medicago truncatula]
Glyma07g31270	1.58	17.04	3.43093	gi|255646747|gb|ACU23847.1|/1.30283e-158/unknown [Glycine max]		Glyma07g05470	3.51	0.33	-3.41093	gi|255645225|gb|ACU23110.1|/0/unknown [Glycine max]		Glyma20g33800	1.64	12.89	2.97448	gi|255627625|gb|ACU14157.1|/7.21263e-113/unknown [Glycine max]		Glyma16g24120	77.05	34.14	-1.17433	gi|255639237|gb|ACU19917.1|/2.8959e-139/unknown [Glycine max]		Glyma03g14980	0.91	6.28	2.78683	gi|255626395|gb|ACU13542.1|/2.34743e-95/unknown [Glycine max]		Glyma13g24490	58.77	10.81	-2.44271	gi|255627263|gb|ACU13976.1|/1.28686e-90/unknown [Glycine max]		Glyma08g45150	0.53	23.64	5.47909	gi|255628273|gb|ACU14481.1|/9.53657e-96/unknown [Glycine max]		Glyma06g01850	541.88	261.66	-1.05028	gi|255641007|gb|ACU20783.1|/0/unknown [Glycine max]
Glyma10g36670	2.1	19.05	3.18133	gi|255633116|gb|ACU16913.1|/1.83557e-44/unknown [Glycine max]		Glyma19g05050	3.33	0.33	-3.33498	gi|255632836|gb|ACU16771.1|/6.15427e-74/unknown [Glycine max]		Glyma08g19420	1.27	9.93	2.96697	gi|217072994|gb|ACJ84857.1|/0/unknown [Medicago truncatula]		Glyma18g10270	98.49	43.54	-1.17764	gi|255642309|gb|ACU21419.1|/0/unknown [Glycine max]		Glyma18g07310	2	13.6	2.76553	gi|255637952|gb|ACU19292.1|/8.83814e-38/unknown [Glycine max]		Glyma06g07810	5.64	1.05	-2.42531	gi|255636973|gb|ACU18819.1|/1.27822e-116/unknown [Glycine max]		Glyma17g34420	1.41	56.64	5.32805	gi|255629347|gb|ACU15018.1|/1.02014e-82/unknown [Glycine max]		Glyma17g03200	19	9.17	-1.05101	gi|255648267|gb|ACU24586.1|/9.25819e-99/unknown [Glycine max]
Glyma02g47850	2.45	22.22	3.18101	gi|255633784|gb|ACU17252.1|/3.82538e-36/unknown [Glycine max]		Glyma11g16000	6.31	0.67	-3.23541	gi|255646140|gb|ACU23556.1|/1.10968e-85/unknown [Glycine max]		Glyma01g00400	3.27	25.08	2.93917	gi|255627677|gb|ACU14183.1|/2.9456e-110/unknown [Glycine max]		Glyma08g46950	25.62	11.32	-1.1784	gi|255644378|gb|ACU22694.1|/0/unknown [Glycine max]		Glyma05g36520	1.64	10.81	2.7206	gi|255641079|gb|ACU20818.1|/0/unknown [Glycine max]		Glyma07g31880	6.55	1.22	-2.42461	gi|255641302|gb|ACU20928.1|/3.27022e-45/unknown [Glycine max]		Glyma06g12890	0.53	18	5.08586	gi|255633476|gb|ACU17096.1|/7.51247e-98/unknown [Glycine max]		Glyma06g14290	69.85	33.7	-1.05151	gi|255646322|gb|ACU23644.1|/0/unknown [Glycine max]
Glyma09g28200	2.1	18.88	3.1684	gi|255645788|gb|ACU23386.1|/7.36772e-130/unknown [Glycine max]		Glyma06g08540	7.01	0.84	-3.06095	gi|255642419|gb|ACU21473.1|/1.14986e-162/unknown [Glycine max]		Glyma13g06440	0.91	6.97	2.93722	gi|255632741|gb|ACU16722.1|/6.11326e-40/unknown [Glycine max]		Glyma12g33440	63.78	28.04	-1.18562	gi|255633828|gb|ACU17275.1|/4.19447e-09/unknown [Glycine max]		Glyma05g30040	1.46	9.59	2.71556	gi|255645435|gb|ACU23213.1|/7.1185e-148/unknown [Glycine max]		Glyma02g45970	23.29	4.36	-2.41731	gi|255647172|gb|ACU24054.1|/0/unknown [Glycine max]		Glyma09g37290	1.41	35.64	4.65973	gi|255628445|gb|ACU14567.1|/1.21241e-40/unknown [Glycine max]		Glyma04g19020	40.99	19.76	-1.05269	gi|255626625|gb|ACU13657.1|/1.47429e-72/unknown [Glycine max]
Glyma15g19100	0.53	4.68	3.14244	gi|255628121|gb|ACU14405.1|/2.41539e-40/unknown [Glycine max]		Glyma20g26730	15.08	1.84	-3.03486	gi|255632548|gb|ACU16624.1|/4.82156e-40/unknown [Glycine max]		Glyma05g01060	0.73	5.57	2.93171	gi|255640883|gb|ACU20724.1|/2.79861e-40/unknown [Glycine max]		Glyma13g19470	15.45	6.79	-1.18612	gi|255626177|gb|ACU13433.1|/2.7006e-52/unknown [Glycine max]		Glyma17g05760	2.18	14.29	2.71261	gi|255637243|gb|ACU18952.1|/7.89487e-88/unknown [Glycine max]		Glyma18g48070	334.42	63.28	-2.40184	gi|255647714|gb|ACU24318.1|/8.01302e-168/unknown [Glycine max]		Glyma06g02100	0.35	8.65	4.62727	gi|255641632|gb|ACU21088.1|/1.47853e-137/unknown [Glycine max]		Glyma06g03380	26.74	12.88	-1.05387	gi|255646048|gb|ACU23511.1|/8.12575e-152/unknown [Glycine max]
Glyma19g00820	0.53	4.34	3.03363	gi|255625607|gb|ACU13148.1|/5.35708e-108/unknown [Glycine max]		Glyma07g05420	4.03	0.5	-3.01078	gi|255645512|gb|ACU23251.1|/1.66866e-152/unknown [Glycine max]		Glyma05g28720	0.55	4.18	2.926	gi|255628685|gb|ACU14687.1|/2.75737e-86/unknown [Glycine max]		Glyma05g22510	21.81	9.58	-1.18689	gi|255631034|gb|ACU15881.1|/2.85023e-81/unknown [Glycine max]		Glyma07g16830	1.09	6.97	2.67683	gi|255630907|gb|ACU15816.1|/2.93677e-125/unknown [Glycine max]		Glyma19g28900	6.37	1.22	-2.38441	gi|255645492|gb|ACU23241.1|/9.4857e-117/unknown [Glycine max]		Glyma17g10050	1.58	32.11	4.34503	gi|255628227|gb|ACU14458.1|/6.00522e-49/unknown [Glycine max]		Glyma12g13430	21.99	10.59	-1.05415	gi|255638900|gb|ACU19752.1|/0/unknown [Glycine max]
Glyma02g14140	3.33	26.4	2.98694	gi|255640979|gb|ACU20769.1|/1.59922e-171/unknown [Glycine max]		Glyma16g32560	88.35	11.36	-2.95927	gi|217072072|gb|ACJ84396.1|/1.82891e-97/unknown [Medicago truncatula]		Glyma05g31550	1.27	9.58	2.9152	gi|255645341|gb|ACU23167.1|/3.29244e-124/unknown [Glycine max]		Glyma13g22800	19.08	8.36	-1.19049	gi|255641074|gb|ACU20816.1|/1.85685e-131/unknown [Glycine max]		Glyma13g29500	2.18	13.6	2.64121	gi|255636449|gb|ACU18563.1|/9.77853e-150/unknown [Glycine max]		Glyma03g31930	11.83	2.27	-2.38169	gi|255630387|gb|ACU15550.1|/9.88464e-30/unknown [Glycine max]		Glyma09g00950	0.53	10.41	4.29583	gi|255640618|gb|ACU20594.1|/1.16392e-91/unknown [Glycine max]		Glyma11g18870	17.59	8.47	-1.05432	gi|255630077|gb|ACU15392.1|/4.38094e-45/unknown [Glycine max]
Glyma16g25860	3.86	29.24	2.92127	gi|255634951|gb|ACU17834.1|/6.27279e-164/unknown [Glycine max]		Glyma06g16990	3.86	0.5	-2.9486	gi|255633496|gb|ACU17106.1|/7.04486e-38/unknown [Glycine max]		Glyma07g35230	0.73	5.4	2.88699	gi|255639201|gb|ACU19899.1|/1.44247e-48/unknown [Glycine max]		Glyma08g02250	141.01	61.65	-1.19362	gi|255641581|gb|ACU21063.1|/1.67072e-125/unknown [Glycine max]		Glyma13g28700	0.73	4.53	2.63354	gi|255646865|gb|ACU23903.1|/9.75766e-150/unknown [Glycine max]		Glyma15g17110	8.92	1.74	-2.35796	gi|255630347|gb|ACU15530.1|/8.22251e-25/unknown [Glycine max]		Glyma20g04820	0.53	10.23	4.27067	gi|255626171|gb|ACU13430.1|/6.86146e-131/unknown [Glycine max]		Glyma10g44020	56.83	27.35	-1.05511	gi|255627105|gb|ACU13897.1|/1.01627e-48/unknown [Glycine max]
Glyma10g07220	3.86	28.57	2.88783	gi|255641068|gb|ACU20813.1|/9.57429e-165/unknown [Glycine max]		Glyma06g07210	7.19	1	-2.84599	gi|255627493|gb|ACU14091.1|/5.88329e-65/unknown [Glycine max]		Glyma08g01700	1.09	7.84	2.84653	gi|255628131|gb|ACU14410.1|/1.33732e-98/unknown [Glycine max]		Glyma14g08510	93.22	40.75	-1.19384	gi|255631660|gb|ACU16197.1|/2.209e-35/unknown [Glycine max]		Glyma09g04840	0.91	5.58	2.61633	gi|255638943|gb|ACU19773.1|/2.27451e-73/unknown [Glycine max]		Glyma12g36750	32.93	6.45	-2.35203	gi|255647793|gb|ACU24357.1|/2.19926e-129/unknown [Glycine max]		Glyma03g39200	2.81	51.52	4.19649	gi|255640851|gb|ACU20708.1|/2.50314e-70/unknown [Glycine max]		Glyma09g07920	108.55	52.23	-1.05541	gi|217071526|gb|ACJ84123.1|/1.71053e-92/unknown [Medicago truncatula]
Glyma01g00840	13.85	101.08	2.86754	gi|255647726|gb|ACU24324.1|/2.6981e-134/unknown [Glycine max]		Glyma20g33710	10.69	1.5	-2.83323	gi|255632338|gb|ACU16527.1|/6.26297e-125/unknown [Glycine max]		Glyma12g02250	1.09	7.66	2.81302	gi|255639689|gb|ACU20138.1|/5.04123e-173/unknown [Glycine max]		Glyma12g08440	63.05	27.52	-1.19602	gi|255640392|gb|ACU20483.1|/1.77571e-54/unknown [Glycine max]		Glyma18g52690	0.91	5.58	2.61633	gi|255631068|gb|ACU15898.1|/2.34112e-100/unknown [Glycine max]		Glyma18g05690	8.01	1.57	-2.35104	gi|255635321|gb|ACU18014.1|/4.12454e-176/unknown [Glycine max]		Glyma13g01600	0.35	6.35	4.18133	gi|255629223|gb|ACU14956.1|/8.00309e-88/unknown [Glycine max]		Glyma14g38720	73.72	35.46	-1.05586	gi|255630675|gb|ACU15697.1|/1.03947e-32/unknown [Glycine max]
Glyma02g44360	1.4	10.19	2.86366	gi|255633388|gb|ACU17051.1|/1.08641e-124/unknown [Glycine max]		Glyma15g15150	7.71	1.17	-2.72022	gi|255631075|gb|ACU15902.1|/1.22267e-23/unknown [Glycine max]		Glyma12g01090	2.54	17.59	2.79186	gi|217075110|gb|ACJ85915.1|/4.56179e-20/unknown [Medicago truncatula]		Glyma15g01040	48.7	21.25	-1.19646	gi|255645971|gb|ACU23474.1|/7.9189e-116/unknown [Glycine max]		Glyma10g27610	3.82	23.01	2.59062	gi|255629835|gb|ACU15268.1|/1.2186e-66/unknown [Glycine max]		Glyma14g11160	12.37	2.44	-2.34189	gi|255626167|gb|ACU13428.1|/5.84649e-87/unknown [Glycine max]		Glyma13g27590	0.35	6.35	4.18133	gi|255638213|gb|ACU19420.1|/3.97359e-73/unknown [Glycine max]		Glyma09g34890	25.69	12.35	-1.0567	gi|255629756|gb|ACU15227.1|/1.95124e-27/unknown [Glycine max]
Glyma02g29580	0.88	6.18	2.81203	gi|255630079|gb|ACU15393.1|/3.72154e-81/unknown [Glycine max]		Glyma09g19760	5.43	0.84	-2.69249	gi|255634004|gb|ACU17364.1|/9.2369e-75/unknown [Glycine max]		Glyma06g04140	0.73	5.05	2.79032	gi|255641316|gb|ACU20935.1|/0/unknown [Glycine max]		Glyma18g47600	83.04	36.23	-1.19662	gi|255638918|gb|ACU19761.1|/0/unknown [Glycine max]		Glyma10g01610	0.73	4.36	2.57836	gi|217071008|gb|ACJ83864.1|/3.00472e-28/unknown [Medicago truncatula]		Glyma06g16800	19.1	3.83	-2.31816	gi|255647983|gb|ACU24448.1|/2.26725e-48/unknown [Glycine max]		Glyma02g07310	0.35	5.82	4.05559	gi|255648212|gb|ACU24559.1|/3.2777e-81/unknown [Glycine max]		Glyma18g48010	501.42	240.84	-1.05794	gi|255634458|gb|ACU17594.1|/0/unknown [Glycine max]
Glyma17g04420	0.7	4.84	2.78958	gi|255637927|gb|ACU19280.1|/1.95961e-86/unknown [Glycine max]		Glyma06g33130	6.31	1	-2.65764	gi|255627427|gb|ACU14058.1|/1.15718e-82/unknown [Glycine max]		Glyma15g18360	28.35	195.76	2.78767	gi|255645885|gb|ACU23432.1|/1.03856e-175/unknown [Glycine max]		Glyma13g04780	13.99	6.1	-1.19751	gi|255639251|gb|ACU19924.1|/1.61334e-164/unknown [Glycine max]		Glyma14g04250	7.28	42.36	2.54069	gi|255625593|gb|ACU13141.1|/3.54262e-51/unknown [Glycine max]		Glyma02g40310	53.86	10.98	-2.29434	gi|255648391|gb|ACU24646.1|/5.74622e-143/unknown [Glycine max]		Glyma11g34380	1.58	25.94	4.03718	gi|255632780|gb|ACU16743.1|/5.83571e-146/unknown [Glycine max]		Glyma02g37060	122.45	58.76	-1.05929	gi|255637507|gb|ACU19080.1|/2.16532e-158/unknown [Glycine max]
Glyma05g09210	2.45	16.54	2.75511	gi|255648358|gb|ACU24630.1|/2.63659e-161/unknown [Glycine max]		Glyma11g00610	8.06	1.34	-2.58855	gi|255629271|gb|ACU14980.1|/1.21745e-102/unknown [Glycine max]		Glyma14g03580	2.18	14.98	2.78064	gi|255632932|gb|ACU16820.1|/3.24607e-20/unknown [Glycine max]		Glyma18g50000	51.61	22.47	-1.19965	gi|255638733|gb|ACU19671.1|/0/unknown [Glycine max]		Glyma14g05010	3.82	22.14	2.53501	gi|255639399|gb|ACU19995.1|/1.77866e-172/unknown [Glycine max]		Glyma08g24840	5.09	1.05	-2.27728	gi|255638837|gb|ACU19722.1|/3.8191e-123/unknown [Glycine max]		Glyma15g01990	1.76	28.76	4.03042	gi|255640548|gb|ACU20559.1|/5.36325e-97/unknown [Glycine max]		Glyma10g43950	32.72	15.7	-1.05941	gi|255647154|gb|ACU24045.1|/3.05238e-156/unknown [Glycine max]
Glyma05g31550	1.05	7.02	2.74108	gi|255645341|gb|ACU23167.1|/3.29244e-124/unknown [Glycine max]		Glyma01g43080	8.76	1.5	-2.54597	gi|255628979|gb|ACU14834.1|/9.55804e-40/unknown [Glycine max]		Glyma06g11790	1.27	8.71	2.77784	gi|255638183|gb|ACU19405.1|/0/unknown [Glycine max]		Glyma03g37340	37.61	16.37	-1.20006	gi|255626631|gb|ACU13660.1|/4.54685e-80/unknown [Glycine max]		Glyma18g48610	7.64	43.93	2.52356	gi|255637404|gb|ACU19030.1|/2.51323e-109/unknown [Glycine max]		Glyma09g12860	6.73	1.39	-2.27552	gi|255632984|gb|ACU16846.1|/5.91928e-51/unknown [Glycine max]		Glyma15g20970	0.88	13.41	3.92966	gi|255625685|gb|ACU13187.1|/6.4965e-100/unknown [Glycine max]		Glyma15g17250	15.83	7.59	-1.06049	gi|255629097|gb|ACU14893.1|/1.01931e-114/unknown [Glycine max]
Glyma07g04820	22.26	148.52	2.73813	gi|255639074|gb|ACU19837.1|/5.68259e-62/unknown [Glycine max]		Glyma13g43780	5.78	1	-2.53107	gi|255625835|gb|ACU13262.1|/1.71497e-96/unknown [Glycine max]		Glyma07g33050	9.45	64.09	2.76171	gi|255632776|gb|ACU16741.1|/2.32731e-114/unknown [Glycine max]		Glyma09g33770	92.49	40.23	-1.20103	gi|217072374|gb|ACJ84547.1|/1.86167e-106/unknown [Medicago truncatula]		Glyma09g37290	1.46	8.37	2.51926	gi|255628445|gb|ACU14567.1|/1.21241e-40/unknown [Glycine max]		Glyma15g18600	50.4	10.46	-2.26854	gi|255646072|gb|ACU23523.1|/3.50118e-141/unknown [Glycine max]		Glyma11g05900	0.53	7.94	3.90507	gi|255632191|gb|ACU16454.1|/5.37613e-52/unknown [Glycine max]		Glyma12g06690	19.53	9.35	-1.06265	gi|255641929|gb|ACU21233.1|/0/unknown [Glycine max]
Glyma07g18200	6.31	41.93	2.73227	gi|255633254|gb|ACU16983.1|/3.46995e-109/unknown [Glycine max]		Glyma16g18700	14.9	2.67	-2.4804	gi|255629702|gb|ACU15200.1|/1.14322e-56/unknown [Glycine max]		Glyma10g36670	3.45	23.16	2.74697	gi|255633116|gb|ACU16913.1|/1.83557e-44/unknown [Glycine max]		Glyma13g37610	42.88	18.64	-1.2019	gi|255626917|gb|ACU13803.1|/4.42982e-109/unknown [Glycine max]		Glyma09g38610	3.46	19.7	2.50935	gi|255631856|gb|ACU16295.1|/2.93198e-98/unknown [Glycine max]		Glyma07g27950	8.37	1.74	-2.26614	gi|217072462|gb|ACJ84591.1|/1.50723e-63/unknown [Medicago truncatula]		Glyma17g18230	0.35	4.59	3.71307	gi|255640582|gb|ACU20576.1|/9.01712e-63/unknown [Glycine max]		Glyma05g38190	30.61	14.64	-1.06409	gi|255640239|gb|ACU20410.1|/0/unknown [Glycine max]
Glyma17g05690	7.54	48.45	2.68386	gi|255632800|gb|ACU16753.1|/1.63491e-96/unknown [Glycine max]		Glyma13g26630	7.19	1.34	-2.42376	gi|255625641|gb|ACU13165.1|/1.67497e-69/unknown [Glycine max]		Glyma08g20320	2.18	14.63	2.74653	gi|217074730|gb|ACJ85725.1|/0/unknown [Medicago truncatula]		Glyma03g41110	35.8	15.5	-1.20769	gi|255638094|gb|ACU19361.1|/7.84174e-136/unknown [Glycine max]		Glyma20g21520	2.37	13.42	2.50143	gi|255647319|gb|ACU24126.1|/1.3691e-66/unknown [Glycine max]		Glyma01g31730	10.01	2.09	-2.25987	gi|255630445|gb|ACU15580.1|/5.80919e-53/unknown [Glycine max]		Glyma06g07900	1.23	15.53	3.65833	gi|255631842|gb|ACU16288.1|/1.09269e-104/unknown [Glycine max]		Glyma02g46960	18.83	9	-1.06504	gi|255631700|gb|ACU16217.1|/3.40244e-59/unknown [Glycine max]
Glyma20g28890	13.67	87.38	2.67629	gi|255627107|gb|ACU13898.1|/3.51259e-80/unknown [Glycine max]		Glyma10g00850	9.29	1.84	-2.33597	gi|255631576|gb|ACU16155.1|/4.56874e-78/unknown [Glycine max]		Glyma01g28810	4.91	32.92	2.74517	gi|255639053|gb|ACU19827.1|/7.48397e-149/unknown [Glycine max]		Glyma01g43720	24.53	10.62	-1.20776	gi|255640018|gb|ACU20300.1|/0/unknown [Glycine max]		Glyma16g01580	5.09	28.59	2.48977	gi|255632578|gb|ACU16639.1|/4.55501e-108/unknown [Glycine max]		Glyma16g26940	39.12	8.19	-2.25597	gi|255639495|gb|ACU20042.1|/0/unknown [Glycine max]		Glyma02g39660	0.35	4.41	3.65535	gi|255636908|gb|ACU18787.1|/2.83503e-96/unknown [Glycine max]		Glyma13g44230	22.52	10.76	-1.06553	gi|255642199|gb|ACU21364.1|/1.1355e-102/unknown [Glycine max]
Glyma12g05760	2.1	13.03	2.63338	gi|255627033|gb|ACU13861.1|/2.38188e-47/unknown [Glycine max]		Glyma07g05250	7.54	1.5	-2.3296	gi|255641601|gb|ACU21073.1|/4.14296e-111/unknown [Glycine max]		Glyma08g22370	6.91	45.8	2.72859	gi|255640540|gb|ACU20555.1|/4.99693e-65/unknown [Glycine max]		Glyma11g17930	20.53	8.88	-1.2091	gi|255641905|gb|ACU21221.1|/0/unknown [Glycine max]		Glyma13g24940	16.01	88.03	2.45902	gi|255646439|gb|ACU23698.1|/1.48439e-110/unknown [Glycine max]		Glyma10g44310	5.82	1.22	-2.25414	gi|255644860|gb|ACU22930.1|/6.15433e-170/unknown [Glycine max]		Glyma09g04100	1.58	19.59	3.63212	gi|255642467|gb|ACU21497.1|/1.27548e-177/unknown [Glycine max]		Glyma03g36860	39.94	19.06	-1.06729	gi|255641250|gb|ACU20902.1|/8.62673e-128/unknown [Glycine max]
Glyma09g09110	1.93	11.53	2.57872	gi|255628163|gb|ACU14426.1|/7.17613e-73/unknown [Glycine max]		Glyma10g41410	7.19	1.5	-2.26103	gi|255636079|gb|ACU18384.1|/0/unknown [Glycine max]		Glyma18g00980	8.54	55.56	2.70174	gi|255630863|gb|ACU15794.1|/2.5723e-53/unknown [Glycine max]		Glyma20g25010	14.17	6.1	-1.21596	gi|255645697|gb|ACU23342.1|/1.29529e-165/unknown [Glycine max]		Glyma07g39180	12.55	67.98	2.43742	gi|255640304|gb|ACU20441.1|/1.283e-79/unknown [Glycine max]		Glyma19g38390	12.37	2.61	-2.24472	gi|255646026|gb|ACU23500.1|/1.38884e-141/unknown [Glycine max]		Glyma13g07770	0.7	8.65	3.62727	gi|255645590|gb|ACU23289.1|/0/unknown [Glycine max]		Glyma06g48130	78.47	37.41	-1.06872	gi|255627231|gb|ACU13960.1|/5.00756e-86/unknown [Glycine max]
Glyma12g35400	0.88	5.18	2.55738	gi|255637362|gb|ACU19010.1|/0/unknown [Glycine max]		Glyma11g27190	4.73	1	-2.24184	gi|255646118|gb|ACU23545.1|/0/unknown [Glycine max]		Glyma11g01020	2.73	17.59	2.68778	gi|217073460|gb|ACJ85089.1|/5.49897e-176/unknown [Medicago truncatula]		Glyma15g11170	73.23	31.52	-1.21617	gi|255647537|gb|ACU24232.1|/0/unknown [Glycine max]		Glyma05g23710	3.28	17.61	2.42463	gi|255628291|gb|ACU14490.1|/3.30847e-28/unknown [Glycine max]		Glyma08g09660	28.75	6.1	-2.23668	gi|255640247|gb|ACU20414.1|/0/unknown [Glycine max]		Glyma19g02190	0.53	6.18	3.54354	gi|255639427|gb|ACU20008.1|/0/unknown [Glycine max]		Glyma04g01070	45.22	21.53	-1.07061	gi|255648279|gb|ACU24592.1|/2.26361e-140/unknown [Glycine max]
Glyma12g35350	1.23	7.02	2.51281	gi|255642537|gb|ACU21532.1|/2.16526e-178/unknown [Glycine max]		Glyma11g04930	6.31	1.34	-2.23541	gi|255645823|gb|ACU23402.1|/1.78639e-39/unknown [Glycine max]		Glyma09g18450	0.73	4.7	2.68669	gi|255648407|gb|ACU24654.1|/3.36925e-127/unknown [Glycine max]		Glyma19g05980	69.41	29.78	-1.2208	gi|255648252|gb|ACU24579.1|/9.11798e-87/unknown [Glycine max]		Glyma13g21210	1.27	6.8	2.42071	gi|255626751|gb|ACU13720.1|/9.42036e-52/unknown [Glycine max]		Glyma06g10740	6.55	1.39	-2.23641	gi|255644898|gb|ACU22949.1|/7.86212e-32/unknown [Glycine max]		Glyma09g03080	1.23	14.12	3.52101	gi|255647897|gb|ACU24407.1|/8.80261e-142/unknown [Glycine max]		Glyma18g25820	13.72	6.53	-1.07113	gi|255628635|gb|ACU14662.1|/1.6117e-67/unknown [Glycine max]
Glyma10g05130	10.69	60.48	2.5002	gi|255627557|gb|ACU14123.1|/8.82399e-117/unknown [Glycine max]		Glyma14g40400	21.21	4.51	-2.23355	gi|255626695|gb|ACU13692.1|/2.44898e-43/unknown [Glycine max]		Glyma18g08410	20.53	130.62	2.66957	gi|255626569|gb|ACU13629.1|/3.0304e-41/unknown [Glycine max]		Glyma13g37000	52.52	22.47	-1.22487	gi|255633828|gb|ACU17275.1|/2.79328e-09/unknown [Glycine max]		Glyma13g04000	1.27	6.62	2.382	gi|255640375|gb|ACU20475.1|/1.56108e-55/unknown [Glycine max]		Glyma04g22810	4.91	1.05	-2.22533	gi|255639917|gb|ACU20251.1|/9.40478e-144/unknown [Glycine max]		Glyma13g20960	0.35	3.88	3.47063	gi|255632580|gb|ACU16640.1|/2.32719e-94/unknown [Glycine max]		Glyma18g03530	20.76	9.88	-1.07122	gi|255645412|gb|ACU23202.1|/0/unknown [Glycine max]
Glyma12g08150	1.4	7.85	2.48727	gi|255638067|gb|ACU19348.1|/1.09436e-119/unknown [Glycine max]		Glyma04g37410	6.14	1.34	-2.19601	gi|255645900|gb|ACU23439.1|/7.55826e-108/unknown [Glycine max]		Glyma12g04150	3.09	19.33	2.64516	gi|217072476|gb|ACJ84598.1|/0/unknown [Medicago truncatula]		Glyma01g04070	123.38	52.77	-1.22532	gi|255628179|gb|ACU14434.1|/1.78527e-83/unknown [Glycine max]		Glyma16g01870	6.91	35.56	2.3635	gi|255645717|gb|ACU23352.1|/7.30568e-150/unknown [Glycine max]		Glyma02g07150	14.56	3.14	-2.21317	gi|255632206|gb|ACU16461.1|/6.7647e-137/unknown [Glycine max]		Glyma18g17330	0.53	5.65	3.41419	gi|255633320|gb|ACU17017.1|/1.64109e-96/unknown [Glycine max]		Glyma03g32000	17.42	8.29	-1.0713	gi|255637393|gb|ACU19025.1|/9.46978e-72/unknown [Glycine max]
Glyma01g00400	5.43	30.41	2.48552	gi|255627677|gb|ACU14183.1|/2.9456e-110/unknown [Glycine max]		Glyma07g03670	5.26	1.17	-2.16855	gi|255647464|gb|ACU24196.1|/1.10801e-136/unknown [Glycine max]		Glyma06g12890	10.54	65.14	2.62767	gi|255633476|gb|ACU17096.1|/7.51247e-98/unknown [Glycine max]		Glyma14g11160	12.72	5.4	-1.23607	gi|255626167|gb|ACU13428.1|/5.84649e-87/unknown [Glycine max]		Glyma06g05810	11.83	60.31	2.34995	gi|255637994|gb|ACU19313.1|/1.87732e-60/unknown [Glycine max]		Glyma16g33270	40.39	8.72	-2.2116	gi|255647032|gb|ACU23984.1|/8.26223e-149/unknown [Glycine max]		Glyma19g43450	9.5	100.04	3.39651	gi|255638621|gb|ACU19616.1|/1.23401e-111/unknown [Glycine max]		Glyma06g37970	131.25	62.28	-1.07548	gi|255631161|gb|ACU15946.1|/1.84071e-60/unknown [Glycine max]
Glyma19g42720	22.26	123.97	2.47747	gi|255625645|gb|ACU13167.1|/3.94038e-61/unknown [Glycine max]		Glyma19g31630	5.26	1.17	-2.16855	gi|255625827|gb|ACU13258.1|/7.16336e-79/unknown [Glycine max]		Glyma06g40330	11.81	72.45	2.61698	gi|255631412|gb|ACU16073.1|/1.45441e-41/unknown [Glycine max]		Glyma14g40400	12.36	5.22	-1.24356	gi|255626695|gb|ACU13692.1|/2.44898e-43/unknown [Glycine max]		Glyma09g28200	7.46	38	2.34875	gi|255645788|gb|ACU23386.1|/7.36772e-130/unknown [Glycine max]		Glyma11g34780	5.64	1.22	-2.20881	gi|255645412|gb|ACU23202.1|/0/unknown [Glycine max]		Glyma01g01460	2.81	28.94	3.36442	gi|255642108|gb|ACU21320.1|/0/unknown [Glycine max]		Glyma11g34130	16.36	7.76	-1.07604	gi|255641194|gb|ACU20874.1|/1.49375e-112/unknown [Glycine max]
Glyma11g06770	1.4	7.69	2.45756	gi|217072372|gb|ACJ84546.1|/5.56836e-99/unknown [Medicago truncatula]		Glyma14g35510	5.96	1.34	-2.15308	gi|255647190|gb|ACU24063.1|/1.7512e-78/unknown [Glycine max]		Glyma14g30490	3.27	20.03	2.6148	gi|255645249|gb|ACU23122.1|/0/unknown [Glycine max]		Glyma12g00440	52.7	22.12	-1.25245	gi|255628613|gb|ACU14651.1|/1.27432e-110/unknown [Glycine max]		Glyma14g39050	6.37	32.42	2.34752	gi|255635258|gb|ACU17983.1|/0/unknown [Glycine max]		Glyma02g40020	40.76	8.89	-2.1969	gi|255645829|gb|ACU23405.1|/2.87445e-157/unknown [Glycine max]		Glyma14g39790	1.23	12.53	3.34866	gi|255639163|gb|ACU19881.1|/1.92362e-170/unknown [Glycine max]		Glyma06g03050	45.04	21.35	-1.07697	gi|255639509|gb|ACU20049.1|/0/unknown [Glycine max]
Glyma12g32390	0.88	4.68	2.41093	gi|255647438|gb|ACU24183.1|/1.15925e-161/unknown [Glycine max]		Glyma12g29670	9.64	2.17	-2.15134	gi|255637219|gb|ACU18940.1|/1.28888e-75/unknown [Glycine max]		Glyma02g45810	2.73	16.72	2.6146	gi|255638151|gb|ACU19389.1|/1.51202e-105/unknown [Glycine max]		Glyma17g08700	12.9	5.4	-1.25634	gi|255646929|gb|ACU23934.1|/2.26819e-22/unknown [Glycine max]		Glyma15g06770	18.01	90.64	2.33135	gi|255633190|gb|ACU16951.1|/1.18943e-95/unknown [Glycine max]		Glyma12g01780	11.1	2.44	-2.18561	gi|255638987|gb|ACU19794.1|/0/unknown [Glycine max]		Glyma14g03800	1.94	19.06	3.29642	gi|255640869|gb|ACU20717.1|/1.01261e-77/unknown [Glycine max]		Glyma02g37710	19.35	9.17	-1.07734	gi|255644528|gb|ACU22767.1|/0/unknown [Glycine max]
Glyma02g01190	2.63	13.87	2.39883	gi|255640314|gb|ACU20445.1|/6.92637e-163/unknown [Glycine max]		Glyma14g23300	8.06	1.84	-2.13107	gi|255645408|gb|ACU23200.1|/0/unknown [Glycine max]		Glyma20g28720	2.73	16.72	2.6146	gi|255638530|gb|ACU19573.1|/0/unknown [Glycine max]		Glyma16g29660	118.11	49.29	-1.26076	gi|255628011|gb|ACU14350.1|/8.70292e-65/unknown [Glycine max]		Glyma08g23440	2.37	11.85	2.32193	gi|255644481|gb|ACU22744.1|/8.96488e-158/unknown [Glycine max]		Glyma04g16270	16.56	3.66	-2.17779	gi|255637209|gb|ACU18935.1|/5.27484e-178/unknown [Glycine max]		Glyma08g12530	2.29	22.41	3.29072	gi|255628785|gb|ACU14737.1|/1.23773e-100/unknown [Glycine max]		Glyma03g31150	31.67	15	-1.07815	gi|255629283|gb|ACU14986.1|/2.12724e-76/unknown [Glycine max]
Glyma13g33360	5.08	26.23	2.36832	gi|255626515|gb|ACU13602.1|/2.47503e-77/unknown [Glycine max]		Glyma14g34500	5.08	1.17	-2.11832	gi|255635670|gb|ACU18184.1|/3.51544e-124/unknown [Glycine max]		Glyma01g01460	5.09	30.83	2.5986	gi|255642108|gb|ACU21320.1|/0/unknown [Glycine max]		Glyma08g08850	65.24	26.99	-1.27333	gi|255636550|gb|ACU18613.1|/1.46305e-141/unknown [Glycine max]		Glyma12g09810	3.82	18.83	2.30139	gi|255635922|gb|ACU18308.1|/3.94203e-145/unknown [Glycine max]		Glyma14g34500	18.56	4.18	-2.15062	gi|255635670|gb|ACU18184.1|/3.51544e-124/unknown [Glycine max]		Glyma05g29400	2.29	21.7	3.24428	gi|255628785|gb|ACU14737.1|/8.18911e-123/unknown [Glycine max]		Glyma12g16560	40.64	19.23	-1.07954	gi|255646584|gb|ACU23766.1|/1.73278e-74/unknown [Glycine max]
Glyma06g06340	2.63	13.53	2.36303	gi|21592409|gb|AAM64360.1|/3.9789e-118/unknown [Arabidopsis thaliana]		Glyma18g02800	13.5	3.17	-2.0904	gi|255647034|gb|ACU23985.1|/2.45214e-108/unknown [Glycine max]		Glyma19g02190	1.27	7.66	2.59252	gi|255639427|gb|ACU20008.1|/0/unknown [Glycine max]		Glyma05g28410	10.54	4.35	-1.27679	gi|255629962|gb|ACU15333.1|/3.94247e-66/unknown [Glycine max]		Glyma12g32230	3.09	15.17	2.29554	gi|255625947|gb|ACU13318.1|/5.4844e-67/unknown [Glycine max]		Glyma03g31920	39.66	9.06	-2.1301	gi|255639562|gb|ACU20075.1|/1.25034e-116/unknown [Glycine max]		Glyma03g40870	2.81	26.29	3.22587	gi|255637828|gb|ACU19234.1|/4.25874e-161/unknown [Glycine max]		Glyma08g18510	2658.21	1256.8	-1.0807	gi|255626243|gb|ACU13466.1|/1.22644e-61/unknown [Glycine max]
Glyma01g01370	1.05	5.35	2.34915	gi|255646270|gb|ACU23619.1|/0/unknown [Glycine max]		Glyma18g12740	12.8	3.01	-2.08831	gi|217073292|gb|ACJ85005.1|/7.39774e-163/unknown [Medicago truncatula]		Glyma19g26640	1.27	7.66	2.59252	gi|255635064|gb|ACU17890.1|/4.63863e-67/unknown [Glycine max]		Glyma11g05300	10.54	4.35	-1.27679	gi|255646353|gb|ACU23656.1|/3.10992e-178/unknown [Glycine max]		Glyma08g07880	1.82	8.89	2.28824	gi|255646598|gb|ACU23773.1|/2.48078e-149/unknown [Glycine max]		Glyma11g37360	411.92	94.48	-2.12428	gi|255638912|gb|ACU19758.1|/8.51144e-174/unknown [Glycine max]		Glyma07g33050	8.27	76.4	3.20761	gi|255632776|gb|ACU16741.1|/2.32731e-114/unknown [Glycine max]		Glyma08g01300	18.3	8.65	-1.08107	gi|217072936|gb|ACJ84828.1|/5.67214e-102/unknown [Medicago truncatula]
Glyma07g05320	1.58	8.02	2.34368	gi|255645717|gb|ACU23352.1|/1.34148e-149/unknown [Glycine max]		Glyma10g31920	5.61	1.34	-2.06577	gi|255628037|gb|ACU14363.1|/3.04505e-53/unknown [Glycine max]		Glyma20g26610	3.82	22.99	2.58936	gi|255627849|gb|ACU14269.1|/1.31759e-130/unknown [Glycine max]		Glyma03g28760	405.77	167.37	-1.27762	gi|255637692|gb|ACU19169.1|/1.58418e-51/unknown [Glycine max]		Glyma09g11460	1.82	8.89	2.28824	gi|255631458|gb|ACU16096.1|/3.8966e-60/unknown [Glycine max]		Glyma06g10570	9.1	2.09	-2.12236	gi|255628073|gb|ACU14381.1|/1.59842e-45/unknown [Glycine max]		Glyma13g24600	0.53	4.76	3.1669	gi|255636065|gb|ACU18377.1|/4.6932e-59/unknown [Glycine max]		Glyma13g41930	140.75	66.52	-1.08127	gi|255632462|gb|ACU16581.1|/8.76331e-68/unknown [Glycine max]
Glyma01g31730	2.28	11.53	2.33829	gi|255630445|gb|ACU15580.1|/5.80919e-53/unknown [Glycine max]		Glyma08g25510	13.85	3.34	-2.05197	gi|239992735|gb|ACS36783.1|/1.33448e-117/unknown [Glycine max]		Glyma20g16920	6.54	39.19	2.58312	gi|255626435|gb|ACU13562.1|/1.32222e-118/unknown [Glycine max]		Glyma15g32540	345.62	142.11	-1.28218	gi|255627177|gb|ACU13933.1|/2.18397e-133/unknown [Glycine max]		Glyma11g33810	3.09	14.82	2.26187	gi|255635407|gb|ACU18056.1|/0/unknown [Glycine max]		Glyma15g11430	22.02	5.06	-2.12161	gi|255647214|gb|ACU24075.1|/5.04899e-08/unknown [Glycine max]		Glyma02g11600	1.23	10.76	3.12895	gi|255647096|gb|ACU24016.1|/7.4135e-105/unknown [Glycine max]		Glyma10g44200	63.51	30	-1.08202	gi|255626205|gb|ACU13447.1|/4.94011e-113/unknown [Glycine max]
Glyma18g48610	12.1	60.31	2.31739	gi|255637404|gb|ACU19030.1|/2.51323e-109/unknown [Glycine max]		Glyma18g41540	8.94	2.17	-2.04258	gi|255630726|gb|ACU15724.1|/2.16854e-46/unknown [Glycine max]		Glyma02g36640	6.54	39.01	2.57648	gi|255628505|gb|ACU14597.1|/5.60948e-20/unknown [Glycine max]		Glyma07g34690	14.9	6.1	-1.28843	gi|255626687|gb|ACU13688.1|/3.78876e-58/unknown [Glycine max]		Glyma14g40110	1.46	6.8	2.21957	gi|255647499|gb|ACU24213.1|/2.68294e-70/unknown [Glycine max]		Glyma17g36780	5.28	1.22	-2.11366	gi|255647511|gb|ACU24219.1|/8.2475e-137/unknown [Glycine max]		Glyma10g39610	8.97	77.99	3.12011	gi|255639291|gb|ACU19943.1|/0/unknown [Glycine max]		Glyma01g03830	14.95	7.06	-1.08241	gi|255635947|gb|ACU18320.1|/0/unknown [Glycine max]
Glyma02g42050	6.84	33.41	2.28821	gi|255645412|gb|ACU23202.1|/0/unknown [Glycine max]		Glyma18g47700	6.84	1.67	-2.03415	gi|255629091|gb|ACU14890.1|/1.31194e-73/unknown [Glycine max]		Glyma10g40470	0.73	4.35	2.57505	gi|255646793|gb|ACU23868.1|/7.52086e-178/unknown [Glycine max]		Glyma08g23260	34.89	14.28	-1.28882	gi|255629085|gb|ACU14887.1|/3.09755e-43/unknown [Glycine max]		Glyma08g08940	2.37	10.98	2.21192	gi|255645253|gb|ACU23124.1|/5.84799e-154/unknown [Glycine max]		Glyma12g12960	24.74	5.75	-2.10521	gi|255628781|gb|ACU14735.1|/1.07899e-117/unknown [Glycine max]		Glyma01g28810	1.94	16.76	3.11089	gi|255639053|gb|ACU19827.1|/7.48397e-149/unknown [Glycine max]		Glyma09g35650	53.84	25.41	-1.08328	gi|255630232|gb|ACU15471.1|/4.99606e-28/unknown [Glycine max]
Glyma13g37350	18.41	89.88	2.28751	gi|255639433|gb|ACU20011.1|/6.14506e-138/unknown [Glycine max]		Glyma05g27960	5.43	1.34	-2.01872	gi|255630869|gb|ACU15797.1|/8.32773e-121/unknown [Glycine max]		Glyma03g41930	1.09	6.44	2.56273	gi|255638084|gb|ACU19356.1|/3.44264e-92/unknown [Glycine max]		Glyma13g40340	13.63	5.57	-1.29104	gi|255631016|gb|ACU15872.1|/3.44564e-08/unknown [Glycine max]		Glyma01g44220	3.28	15.17	2.20945	gi|255638015|gb|ACU19323.1|/1.01342e-112/unknown [Glycine max]		Glyma01g05580	34.02	8.02	-2.08471	gi|217074996|gb|ACJ85858.1|/0/unknown [Medicago truncatula]		Glyma02g06140	2.11	18	3.09268	gi|255631746|gb|ACU16240.1|/2.55656e-58/unknown [Glycine max]		Glyma01g13170	129.14	60.87	-1.08513	gi|255636690|gb|ACU18681.1|/8.93519e-160/unknown [Glycine max]
Glyma06g13640	1.05	5.01	2.25442	gi|255647148|gb|ACU24042.1|/1.41314e-133/unknown [Glycine max]		Glyma20g25520	8.76	2.17	-2.01324	gi|255630758|gb|ACU15740.1|/4.18194e-23/unknown [Glycine max]		Glyma01g04190	1.82	10.62	2.54477	gi|217071620|gb|ACJ84170.1|/1.54418e-62/unknown [Medicago truncatula]		Glyma17g13670	13.63	5.57	-1.29104	gi|255636688|gb|ACU18680.1|/1.39909e-120/unknown [Glycine max]		Glyma15g11490	1.46	6.62	2.18086	gi|255640074|gb|ACU20328.1|/3.9236e-175/unknown [Glycine max]		Glyma15g42900	7.28	1.74	-2.06485	gi|255636212|gb|ACU18447.1|/0/unknown [Glycine max]		Glyma09g30380	0.53	4.41	3.05671	gi|255633088|gb|ACU16899.1|/1.83829e-31/unknown [Glycine max]		Glyma05g00470	20.23	9.53	-1.08595	gi|255628989|gb|ACU14839.1|/8.01533e-44/unknown [Glycine max]
Glyma13g01600	1.05	5.01	2.25442	gi|255629223|gb|ACU14956.1|/8.00309e-88/unknown [Glycine max]		Glyma15g06790	42.6	10.69	-1.99459	gi|255630145|gb|ACU15426.1|/1.35771e-78/unknown [Glycine max]		Glyma09g09220	9.45	54.86	2.53737	gi|255647687|gb|ACU24305.1|/0/unknown [Glycine max]		Glyma11g34130	12.36	5.05	-1.29132	gi|255641194|gb|ACU20874.1|/1.49375e-112/unknown [Glycine max]		Glyma09g07670	3.64	16.39	2.17081	gi|255640824|gb|ACU20695.1|/1.34202e-113/unknown [Glycine max]		Glyma11g34670	12.37	2.96	-2.06318	gi|255647486|gb|ACU24207.1|/9.11646e-42/unknown [Glycine max]		Glyma18g03950	0.53	4.41	3.05671	gi|255632780|gb|ACU16743.1|/4.61915e-139/unknown [Glycine max]		Glyma12g01270	19.88	9.35	-1.08828	gi|255633450|gb|ACU17083.1|/2.29231e-132/unknown [Glycine max]
Glyma05g23710	5.26	25.06	2.25225	gi|255628291|gb|ACU14490.1|/3.30847e-28/unknown [Glycine max]		Glyma08g36520	5.96	1.5	-1.99035	gi|255640702|gb|ACU20635.1|/4.4069e-123/unknown [Glycine max]		Glyma09g39930	0.91	5.22	2.52011	gi|255628937|gb|ACU14813.1|/1.13126e-45/unknown [Glycine max]		Glyma04g32710	42.34	17.24	-1.29626	gi|255635200|gb|ACU17955.1|/5.89906e-152/unknown [Glycine max]		Glyma12g34660	9.1	40.96	2.17028	gi|255640877|gb|ACU20721.1|/9.27455e-34/unknown [Glycine max]		Glyma02g01630	15.28	3.66	-2.06173	gi|255638352|gb|ACU19488.1|/3.63686e-59/unknown [Glycine max]		Glyma10g39060	1.23	10.06	3.0319	gi|255630222|gb|ACU15466.1|/7.44759e-100/unknown [Glycine max]		Glyma13g28890	14.25	6.7	-1.08873	gi|118486479|gb|ABK95079.1|/3.77993e-171/unknown [Populus trichocarpa]
Glyma02g07180	1.93	9.19	2.25146	gi|255627211|gb|ACU13950.1|/1.51999e-103/unknown [Glycine max]		Glyma09g04330	8.59	2.17	-1.98496	gi|255637276|gb|ACU18968.1|/0/unknown [Glycine max]		Glyma17g36090	0.91	5.22	2.52011	gi|255636611|gb|ACU18643.1|/0/unknown [Glycine max]		Glyma13g04630	27.98	11.32	-1.30552	gi|255630194|gb|ACU15452.1|/3.28119e-104/unknown [Glycine max]		Glyma09g31220	3.46	15.51	2.16435	gi|255633514|gb|ACU17115.1|/4.35852e-124/unknown [Glycine max]		Glyma03g02440	6.55	1.57	-2.06073	gi|255641154|gb|ACU20854.1|/1.05293e-118/unknown [Glycine max]		Glyma10g44160	1.41	11.47	3.0241	gi|255647072|gb|ACU24004.1|/1.48173e-162/unknown [Glycine max]		Glyma07g22950	90.96	42.7	-1.091	gi|255642553|gb|ACU21540.1|/1.30054e-140/unknown [Glycine max]
Glyma13g24940	91.68	436.22	2.25038	gi|255646439|gb|ACU23698.1|/1.48439e-110/unknown [Glycine max]		Glyma15g15360	11.74	3.01	-1.9636	gi|255644611|gb|ACU22808.1|/0/unknown [Glycine max]		Glyma11g04330	10.36	58.69	2.50209	gi|255640576|gb|ACU20573.1|/1.17241e-107/unknown [Glycine max]		Glyma15g09150	13.81	5.57	-1.30996	gi|255635260|gb|ACU17984.1|/2.59409e-55/unknown [Glycine max]		Glyma05g07680	1.64	7.32	2.15815	gi|255639859|gb|ACU20222.1|/0/unknown [Glycine max]		Glyma14g09970	8.01	1.92	-2.0607	gi|255637389|gb|ACU19023.1|/1.44119e-35/unknown [Glycine max]		Glyma07g16760	2.64	21.17	3.00341	gi|255629059|gb|ACU14874.1|/9.66814e-80/unknown [Glycine max]		Glyma18g08900	95.89	44.99	-1.09178	gi|255631238|gb|ACU15986.1|/1.36234e-84/unknown [Glycine max]
Glyma12g06690	6.84	32.41	2.24437	gi|255641929|gb|ACU21233.1|/0/unknown [Glycine max]		Glyma19g33330	378.82	97.4	-1.95952	gi|255628051|gb|ACU14370.1|/1.82344e-101/unknown [Glycine max]		Glyma17g10050	5.45	30.3	2.47499	gi|255628227|gb|ACU14458.1|/6.00522e-49/unknown [Glycine max]		Glyma20g21250	47.97	19.33	-1.31129	gi|255628071|gb|ACU14380.1|/1.45295e-37/unknown [Glycine max]		Glyma16g32230	3.64	16.21	2.15487	gi|255647927|gb|ACU24421.1|/2.29242e-171/unknown [Glycine max]		Glyma19g32830	17.28	4.18	-2.04753	gi|255634852|gb|ACU17785.1|/3.46518e-157/unknown [Glycine max]		Glyma16g05350	23.93	187.56	2.97046	gi|255627111|gb|ACU13900.1|/1.94441e-73/unknown [Glycine max]		Glyma09g27870	62.11	29.11	-1.09331	gi|255625801|gb|ACU13245.1|/5.79395e-106/unknown [Glycine max]
Glyma07g38580	2.45	11.53	2.23454	gi|255639824|gb|ACU20205.1|/1.3208e-170/unknown [Glycine max]		Glyma13g23700	24.02	6.18	-1.95856	gi|255647781|gb|ACU24351.1|/2.60923e-99/unknown [Glycine max]		Glyma11g34350	0.91	5.05	2.47234	gi|255630103|gb|ACU15405.1|/3.03029e-122/unknown [Glycine max]		Glyma06g12540	12.54	5.05	-1.31218	gi|118485999|gb|ABK94843.1|/0/unknown [Populus trichocarpa]		Glyma10g27760	13.83	60.84	2.13722	gi|255630389|gb|ACU15551.1|/3.23595e-21/unknown [Glycine max]		Glyma20g23540	50.22	12.2	-2.04138	gi|217073002|gb|ACJ84861.1|/7.37142e-81/unknown [Medicago truncatula]		Glyma01g43080	0.53	4.06	2.93742	gi|255628979|gb|ACU14834.1|/9.55804e-40/unknown [Glycine max]		Glyma08g06150	13.55	6.35	-1.09346	gi|255645937|gb|ACU23457.1|/0/unknown [Glycine max]
Glyma15g08080	1.75	8.19	2.22651	gi|255626237|gb|ACU13463.1|/4.69906e-76/unknown [Glycine max]		Glyma04g02560	19.28	5.01	-1.94422	gi|255641397|gb|ACU20975.1|/1.87141e-47/unknown [Glycine max]		Glyma05g02740	2.18	12.02	2.46304	gi|255634850|gb|ACU17784.1|/0/unknown [Glycine max]		Glyma08g03910	41.61	16.72	-1.31536	gi|255631858|gb|ACU16296.1|/4.69851e-72/unknown [Glycine max]		Glyma05g05540	4.55	19.87	2.12665	gi|255639129|gb|ACU19864.1|/0/unknown [Glycine max]		Glyma10g32580	489.43	119.23	-2.03736	gi|255627457|gb|ACU14073.1|/1.84402e-63/unknown [Glycine max]		Glyma08g07960	0.53	4.06	2.93742	gi|255647785|gb|ACU24353.1|/2.11089e-173/unknown [Glycine max]		Glyma11g35030	50.49	23.64	-1.09477	gi|255640219|gb|ACU20400.1|/1.52039e-165/unknown [Glycine max]
Glyma12g10760	1.23	5.68	2.20723	gi|255627895|gb|ACU14292.1|/3.21626e-30/unknown [Glycine max]		Glyma06g11790	16.65	4.34	-1.93976	gi|255638183|gb|ACU19405.1|/0/unknown [Glycine max]		Glyma09g07070	29.07	158.49	2.44679	gi|255645885|gb|ACU23432.1|/4.11162e-144/unknown [Glycine max]		Glyma03g33070	105.58	42.32	-1.31893	gi|255631105|gb|ACU15918.1|/6.94268e-88/unknown [Glycine max]		Glyma11g05900	1.64	7.15	2.12425	gi|255632191|gb|ACU16454.1|/5.37613e-52/unknown [Glycine max]		Glyma13g18820	15.65	3.83	-2.03075	gi|255626935|gb|ACU13812.1|/3.87623e-45/unknown [Glycine max]		Glyma05g01850	2.81	21	2.90175	gi|255628227|gb|ACU14458.1|/8.83797e-50/unknown [Glycine max]		Glyma15g03570	13.2	6.18	-1.09486	gi|255636338|gb|ACU18508.1|/0/unknown [Glycine max]
Glyma19g26710	1.23	5.68	2.20723	gi|255628627|gb|ACU14658.1|/3.92302e-86/unknown [Glycine max]		Glyma12g09190	7.54	2	-1.91456	gi|255639849|gb|ACU20217.1|/0/unknown [Glycine max]		Glyma16g32430	1.09	5.92	2.44127	gi|217074978|gb|ACJ85849.1|/1.06924e-07/unknown [Medicago truncatula]		Glyma18g49410	20.9	8.36	-1.32193	gi|255646044|gb|ACU23509.1|/6.00655e-146/unknown [Glycine max]		Glyma06g46740	54.58	232.88	2.09314	gi|255635382|gb|ACU18044.1|/1.30906e-154/unknown [Glycine max]		Glyma03g35530	7.82	1.92	-2.02606	gi|255633192|gb|ACU16952.1|/1.18234e-62/unknown [Glycine max]		Glyma17g14930	9.68	71.81	2.89111	gi|255630522|gb|ACU15619.1|/1.33954e-42/unknown [Glycine max]		Glyma19g42860	44.86	21	-1.09504	gi|255632216|gb|ACU16466.1|/2.51004e-61/unknown [Glycine max]
Glyma17g10650	1.23	5.68	2.20723	gi|255635026|gb|ACU17871.1|/2.05638e-106/unknown [Glycine max]		Glyma19g24300	17.53	4.68	-1.90525	gi|255641492|gb|ACU21021.1|/6.02763e-122/unknown [Glycine max]		Glyma08g45880	2.54	13.76	2.43758	gi|255629726|gb|ACU15212.1|/5.05081e-72/unknown [Glycine max]		Glyma09g34760	90.49	36.05	-1.32776	gi|255625667|gb|ACU13178.1|/8.10632e-137/unknown [Glycine max]		Glyma15g06170	1.27	5.4	2.08813	gi|255641101|gb|ACU20829.1|/1.06266e-139/unknown [Glycine max]		Glyma13g18400	31.48	7.84	-2.00551	gi|255630387|gb|ACU15550.1|/4.2418e-69/unknown [Glycine max]		Glyma06g28650	0.53	3.88	2.87199	gi|255632707|gb|ACU16705.1|/1.88011e-31/unknown [Glycine max]		Glyma14g36670	28.68	13.41	-1.09674	gi|255635455|gb|ACU18080.1|/7.12777e-74/unknown [Glycine max]
Glyma07g32120	11.74	53.8	2.19617	gi|217075142|gb|ACJ85931.1|/2.81429e-106/unknown [Medicago truncatula]		Glyma09g38600	17.53	4.68	-1.90525	gi|255645646|gb|ACU23317.1|/7.5014e-115/unknown [Glycine max]		Glyma15g06800	17.63	94.92	2.42868	gi|255630145|gb|ACU15426.1|/1.37327e-81/unknown [Glycine max]		Glyma08g41040	67.42	26.82	-1.32987	gi|255629281|gb|ACU14985.1|/7.70714e-84/unknown [Glycine max]		Glyma06g04140	2.55	10.81	2.0838	gi|255641316|gb|ACU20935.1|/0/unknown [Glycine max]		Glyma18g22680	9.1	2.27	-2.00317	gi|255630329|gb|ACU15521.1|/1.96073e-42/unknown [Glycine max]		Glyma05g16070	0.7	5.12	2.87072	gi|255637804|gb|ACU19223.1|/4.13305e-76/unknown [Glycine max]		Glyma06g20700	26.04	12.17	-1.0974	gi|255638203|gb|ACU19415.1|/1.43231e-124/unknown [Glycine max]
Glyma06g05810	12.27	55.97	2.18952	gi|255637994|gb|ACU19313.1|/1.87732e-60/unknown [Glycine max]		Glyma16g33790	338.15	90.72	-1.89817	gi|255627649|gb|ACU14169.1|/1.67858e-114/unknown [Glycine max]		Glyma15g01900	0.91	4.88	2.42294	gi|255640650|gb|ACU20610.1|/1.34538e-48/unknown [Glycine max]		Glyma02g03620	64.87	25.78	-1.3313	gi|255639457|gb|ACU20023.1|/2.54752e-139/unknown [Glycine max]		Glyma16g34570	11.46	48.11	2.06973	gi|255646947|gb|ACU23943.1|/0/unknown [Glycine max]		Glyma13g20260	18.74	4.71	-1.99232	gi|255635918|gb|ACU18306.1|/0/unknown [Glycine max]		Glyma08g19170	2.81	20.29	2.85213	gi|255640289|gb|ACU20434.1|/1.6721e-175/unknown [Glycine max]		Glyma09g09110	195.82	91.4	-1.09926	gi|255628163|gb|ACU14426.1|/7.17613e-73/unknown [Glycine max]
Glyma13g29070	2.63	11.86	2.17297	gi|255630099|gb|ACU15403.1|/7.83553e-66/unknown [Glycine max]		Glyma08g48050	9.29	2.51	-1.88799	gi|255632113|gb|ACU16409.1|/3.65632e-86/unknown [Glycine max]		Glyma0448s00200	3.63	19.33	2.4128	gi|255630704|gb|ACU15713.1|/9.94381e-15/unknown [Glycine max]		Glyma02g45430	30.35	12.02	-1.33626	gi|255631354|gb|ACU16044.1|/3.54915e-100/unknown [Glycine max]		Glyma03g38440	3.46	14.47	2.06422	gi|255645771|gb|ACU23378.1|/3.44156e-118/unknown [Glycine max]		Glyma05g04400	96.25	24.23	-1.98999	gi|255632101|gb|ACU16403.1|/1.68529e-40/unknown [Glycine max]		Glyma08g22740	17.24	123.33	2.83869	gi|255639039|gb|ACU19820.1|/1.41419e-154/unknown [Glycine max]		Glyma10g01750	94.13	43.93	-1.09945	gi|255627153|gb|ACU13921.1|/3.16209e-80/unknown [Glycine max]
Glyma03g40720	1.58	7.02	2.15155	gi|255638648|gb|ACU19629.1|/0/unknown [Glycine max]		Glyma07g09090	6.66	1.84	-1.85582	gi|255636754|gb|ACU18711.1|/1.29775e-116/unknown [Glycine max]		Glyma03g39930	1.45	7.66	2.40129	gi|255629127|gb|ACU14908.1|/1.78893e-93/unknown [Glycine max]		Glyma08g23800	62.69	24.73	-1.34197	gi|255639606|gb|ACU20097.1|/6.59271e-172/unknown [Glycine max]		Glyma08g27070	80.6	335.9	2.05918	gi|255637306|gb|ACU18983.1|/0/unknown [Glycine max]		Glyma02g42770	68.78	17.43	-1.98042	gi|255633366|gb|ACU17040.1|/1.64103e-34/unknown [Glycine max]		Glyma16g28340	0.7	4.94	2.81908	gi|255642251|gb|ACU21390.1|/8.39591e-106/unknown [Glycine max]		Glyma11g02140	15.13	7.06	-1.09967	gi|255627593|gb|ACU14141.1|/9.8367e-60/unknown [Glycine max]
Glyma19g40400	3.33	14.7	2.14222	gi|255640384|gb|ACU20479.1|/3.80689e-60/unknown [Glycine max]		Glyma07g34050	15.08	4.18	-1.85106	gi|255638513|gb|ACU19565.1|/2.59443e-53/unknown [Glycine max]		Glyma10g44160	2	10.45	2.38543	gi|255647072|gb|ACU24004.1|/1.48173e-162/unknown [Glycine max]		Glyma19g40320	27.44	10.8	-1.34525	gi|255641244|gb|ACU20899.1|/2.84407e-61/unknown [Glycine max]		Glyma20g28890	34.21	141.72	2.05055	gi|255627107|gb|ACU13898.1|/3.51259e-80/unknown [Glycine max]		Glyma17g14860	254.36	64.67	-1.9757	gi|255628521|gb|ACU14605.1|/3.03777e-40/unknown [Glycine max]		Glyma18g25760	0.7	4.94	2.81908	gi|255644920|gb|ACU22960.1|/1.79949e-152/unknown [Glycine max]		Glyma08g06010	42.75	19.94	-1.10026	gi|255646412|gb|ACU23685.1|/0/unknown [Glycine max]
Glyma08g09200	41.37	181.94	2.13681	gi|255627103|gb|ACU13896.1|/1.30498e-60/unknown [Glycine max]		Glyma17g03360	8.41	2.34	-1.8456	gi|255640867|gb|ACU20716.1|/1.27074e-77/unknown [Glycine max]		Glyma04g00980	3.45	17.94	2.37851	gi|255637988|gb|ACU19310.1|/2.91463e-110/unknown [Glycine max]		Glyma20g36880	72.14	28.21	-1.35459	gi|255642393|gb|ACU21460.1|/5.24432e-22/unknown [Glycine max]		Glyma19g28240	9.83	40.27	2.03444	gi|255641471|gb|ACU21011.1|/0/unknown [Glycine max]		Glyma08g09670	84.24	21.62	-1.96214	gi|255640247|gb|ACU20414.1|/0/unknown [Glycine max]		Glyma19g02450	1.23	8.65	2.81404	gi|255641565|gb|ACU21056.1|/0/unknown [Glycine max]		Glyma05g28060	199.51	92.98	-1.10147	gi|255633110|gb|ACU16910.1|/1.22742e-12/unknown [Glycine max]
Glyma19g28240	3.16	13.87	2.13397	gi|255641471|gb|ACU21011.1|/0/unknown [Glycine max]		Glyma12g33530	29.27	8.19	-1.83749	gi|255633364|gb|ACU17039.1|/1.23763e-91/unknown [Glycine max]		Glyma16g17680	3.63	18.81	2.37346	gi|255640050|gb|ACU20316.1|/1.78535e-101/unknown [Glycine max]		Glyma01g04750	14.72	5.75	-1.35614	gi|255636393|gb|ACU18535.1|/8.27852e-111/unknown [Glycine max]		Glyma20g38100	2.73	11.16	2.03136	gi|255629436|gb|ACU15064.1|/5.07513e-85/unknown [Glycine max]		Glyma01g39810	27.84	7.15	-1.96114	gi|255639301|gb|ACU19948.1|/9.21967e-15/unknown [Glycine max]		Glyma17g06540	0.88	6.18	2.81203	gi|255642191|gb|ACU21360.1|/3.42461e-40/unknown [Glycine max]		Glyma11g08290	12.49	5.82	-1.10168	gi|255641336|gb|ACU20945.1|/0/unknown [Glycine max]
Glyma15g16180	2.45	10.69	2.12541	gi|255640026|gb|ACU20304.1|/5.89237e-13/unknown [Glycine max]		Glyma09g37600	25.07	7.02	-1.83642	gi|255630802|gb|ACU15762.1|/2.07085e-48/unknown [Glycine max]		Glyma02g15430	9.45	48.76	2.36731	gi|255626091|gb|ACU13390.1|/4.97415e-115/unknown [Glycine max]		Glyma11g11280	32.16	12.54	-1.35873	gi|255626659|gb|ACU13674.1|/6.65184e-53/unknown [Glycine max]		Glyma18g43130	2.18	8.89	2.02786	gi|255632228|gb|ACU16472.1|/5.06298e-92/unknown [Glycine max]		Glyma19g35700	9.46	2.44	-1.95496	gi|255645291|gb|ACU23142.1|/7.39187e-70/unknown [Glycine max]		Glyma13g38720	1.76	12.35	2.81086	gi|255637379|gb|ACU19018.1|/7.71164e-172/unknown [Glycine max]		Glyma20g27280	60.17	27.88	-1.10981	gi|255638545|gb|ACU19580.1|/0/unknown [Glycine max]
Glyma06g05980	1.58	6.85	2.11618	gi|255637535|gb|ACU19094.1|/6.00294e-99/unknown [Glycine max]		Glyma06g41530	6.49	1.84	-1.81851	gi|255636705|gb|ACU18688.1|/0/unknown [Glycine max]		Glyma20g30950	2.54	13.06	2.36225	gi|255632340|gb|ACU16528.1|/2.51008e-95/unknown [Glycine max]		Glyma13g38040	42.52	16.55	-1.36131	gi|255647438|gb|ACU24183.1|/2.34991e-162/unknown [Glycine max]		Glyma13g38240	1.46	5.93	2.02206	gi|255630020|gb|ACU15362.1|/4.35196e-67/unknown [Glycine max]		Glyma13g40780	135.55	35.04	-1.95175	gi|255629297|gb|ACU14993.1|/1.11557e-63/unknown [Glycine max]		Glyma07g37720	0.7	4.76	2.76553	gi|255638817|gb|ACU19712.1|/1.46889e-85/unknown [Glycine max]		Glyma06g07000	18.3	8.47	-1.11141	gi|255631380|gb|ACU16057.1|/2.85573e-88/unknown [Glycine max]
Glyma16g09990	1.58	6.85	2.11618	gi|255641160|gb|ACU20857.1|/0/unknown [Glycine max]		Glyma02g44540	8.24	2.34	-1.81614	gi|255644372|gb|ACU22691.1|/6.27472e-161/unknown [Glycine max]		Glyma01g24650	4.54	23.34	2.36204	gi|255636959|gb|ACU18812.1|/0/unknown [Glycine max]		Glyma10g31260	49.24	19.16	-1.36173	gi|255645092|gb|ACU23045.1|/5.34966e-140/unknown [Glycine max]		Glyma05g33640	1.46	5.93	2.02206	gi|255640157|gb|ACU20369.1|/4.0477e-126/unknown [Glycine max]		Glyma02g41520	39.66	10.28	-1.94784	gi|255630470|gb|ACU15593.1|/1.4747e-72/unknown [Glycine max]		Glyma10g37360	0.7	4.76	2.76553	gi|255637812|gb|ACU19227.1|/6.20305e-115/unknown [Glycine max]		Glyma12g14360	54.19	25.05	-1.11322	gi|217073416|gb|ACJ85067.1|/4.4323e-151/unknown [Medicago truncatula]
Glyma01g38750	4.21	18.21	2.11284	gi|255645939|gb|ACU23458.1|/6.71054e-175/unknown [Glycine max]		Glyma05g08220	7.01	2	-1.80941	gi|255641889|gb|ACU21213.1|/3.41801e-154/unknown [Glycine max]		Glyma08g45150	8.72	44.06	2.33707	gi|255628273|gb|ACU14481.1|/9.53657e-96/unknown [Glycine max]		Glyma09g28440	35.07	13.58	-1.36875	gi|255641130|gb|ACU20843.1|/1.34285e-129/unknown [Glycine max]		Glyma19g41040	5.09	20.57	2.0148	gi|255645771|gb|ACU23378.1|/1.04652e-108/unknown [Glycine max]		Glyma12g04080	99.89	25.97	-1.94349	gi|255646011|gb|ACU23493.1|/3.0264e-179/unknown [Glycine max]		Glyma14g02540	0.7	4.76	2.76553	gi|255630839|gb|ACU15782.1|/5.70916e-66/unknown [Glycine max]		Glyma19g28500	69.49	32.11	-1.11378	gi|255645029|gb|ACU23014.1|/1.2469e-120/unknown [Glycine max]
Glyma07g02240	1.4	6.01	2.10194	gi|255627007|gb|ACU13848.1|/5.77902e-55/unknown [Glycine max]		Glyma06g14350	17.53	5.01	-1.80694	gi|255645127|gb|ACU23062.1|/9.35456e-105/unknown [Glycine max]		Glyma05g25850	1.45	7.31	2.33382	gi|255638161|gb|ACU19394.1|/9.56458e-34/unknown [Glycine max]		Glyma12g06300	65.6	25.25	-1.37741	gi|255637970|gb|ACU19301.1|/2.2214e-125/unknown [Glycine max]		Glyma03g27960	1.64	6.62	2.01314	gi|255640112|gb|ACU20347.1|/0/unknown [Glycine max]		Glyma19g30290	8.01	2.09	-1.9383	gi|255647305|gb|ACU24119.1|/1.81367e-132/unknown [Glycine max]		Glyma04g08240	1.23	8.29	2.75271	gi|255632296|gb|ACU16506.1|/3.6313e-73/unknown [Glycine max]		Glyma14g10550	17.59	8.12	-1.1152	gi|255639082|gb|ACU19841.1|/2.02981e-179/unknown [Glycine max]
Glyma11g01010	30.5	129.98	2.09141	gi|255629944|gb|ACU15324.1|/2.87373e-70/unknown [Glycine max]		Glyma15g03250	8.59	2.51	-1.77497	gi|255648329|gb|ACU24616.1|/0/unknown [Glycine max]		Glyma08g19170	2.73	13.76	2.33351	gi|255640289|gb|ACU20434.1|/1.6721e-175/unknown [Glycine max]		Glyma01g00860	14.54	5.57	-1.38428	gi|255627383|gb|ACU14036.1|/2.40768e-37/unknown [Glycine max]		Glyma17g06100	1.64	6.62	2.01314	gi|255636008|gb|ACU18349.1|/0/unknown [Glycine max]		Glyma10g39610	19.29	5.06	-1.93064	gi|255639291|gb|ACU19943.1|/0/unknown [Glycine max]		Glyma05g27640	1.94	13.06	2.75103	gi|255638126|gb|ACU19377.1|/3.00671e-145/unknown [Glycine max]		Glyma19g37000	1317.76	607.67	-1.11673	gi|255632510|gb|ACU16605.1|/2.53619e-121/unknown [Glycine max]
Glyma18g39740	2.28	9.69	2.08746	gi|217074890|gb|ACJ85805.1|/0/unknown [Medicago truncatula]		Glyma02g42270	7.36	2.17	-1.76201	gi|255627221|gb|ACU13955.1|/1.04973e-88/unknown [Glycine max]		Glyma17g37210	3.63	18.29	2.33301	gi|255634753|gb|ACU17738.1|/1.49379e-115/unknown [Glycine max]		Glyma13g20390	9.63	3.66	-1.39569	gi|255636652|gb|ACU18663.1|/0/unknown [Glycine max]		Glyma07g05320	2.55	10.28	2.01127	gi|255645717|gb|ACU23352.1|/1.34148e-149/unknown [Glycine max]		Glyma03g12150	16.56	4.36	-1.9253	gi|255633504|gb|ACU17110.1|/1.21059e-25/unknown [Glycine max]		Glyma15g11800	1.58	10.41	2.71997	gi|255640618|gb|ACU20594.1|/8.77351e-95/unknown [Glycine max]		Glyma02g05560	65.45	30.17	-1.11728	gi|255627135|gb|ACU13912.1|/2.69062e-57/unknown [Glycine max]
Glyma03g41240	6.14	26.06	2.08553	gi|255645935|gb|ACU23456.1|/1.70802e-49/unknown [Glycine max]		Glyma19g03530	10.69	3.17	-1.75371	gi|255645677|gb|ACU23332.1|/1.21079e-108/unknown [Glycine max]		Glyma05g01850	5.09	25.6	2.33041	gi|255628227|gb|ACU14458.1|/8.83797e-50/unknown [Glycine max]		Glyma09g32440	19.81	7.49	-1.40319	gi|255646042|gb|ACU23508.1|/1.04329e-144/unknown [Glycine max]		Glyma11g37440	8.92	35.91	2.00927	gi|255629119|gb|ACU14904.1|/6.01699e-111/unknown [Glycine max]		Glyma08g02220	15.83	4.18	-1.92109	gi|255632994|gb|ACU16851.1|/1.64972e-117/unknown [Glycine max]		Glyma01g00730	4.57	29.82	2.70601	gi|255638590|gb|ACU19602.1|/5.18179e-116/unknown [Glycine max]		Glyma06g12130	13.02	6	-1.1177	gi|255635177|gb|ACU17944.1|/0/unknown [Glycine max]
Glyma12g03460	1.58	6.68	2.07992	gi|255640364|gb|ACU20470.1|/3.97696e-53/unknown [Glycine max]		Glyma01g03070	200.37	59.64	-1.74831	gi|255632832|gb|ACU16769.1|/6.11365e-06/unknown [Glycine max]		Glyma15g42680	1.64	8.19	2.32017	gi|255647793|gb|ACU24357.1|/2.45378e-80/unknown [Glycine max]		Glyma16g04950	86.31	32.57	-1.40598	gi|255647007|gb|ACU23972.1|/1.35868e-151/unknown [Glycine max]		Glyma17g14880	9.28	37.3	2.00698	gi|255629379|gb|ACU15034.1|/4.40875e-31/unknown [Glycine max]		Glyma12g33110	28.93	7.67	-1.91527	gi|255639433|gb|ACU20011.1|/2.43054e-124/unknown [Glycine max]		Glyma08g17700	9.68	62.81	2.69792	gi|255633218|gb|ACU16965.1|/1.37204e-39/unknown [Glycine max]		Glyma08g09200	101.87	46.93	-1.11815	gi|255627103|gb|ACU13896.1|/1.30498e-60/unknown [Glycine max]
Glyma03g42050	1.4	5.85	2.06301	gi|255638086|gb|ACU19357.1|/9.88394e-134/unknown [Glycine max]		Glyma05g05420	437.19	130.48	-1.74443	gi|255648310|gb|ACU24607.1|/3.00581e-78/unknown [Glycine max]		Glyma03g34770	1.09	5.4	2.30863	gi|92870930|gb|ABE80130.1|/1.85299e-151/Protein of unknown function DUF668 [Medicago truncatula]		Glyma08g40510	21.26	8.01	-1.40827	gi|255629185|gb|ACU14937.1|/1.6162e-34/unknown [Glycine max]		Glyma08g09900	2.18	8.72	2	gi|255636461|gb|ACU18569.1|/0/unknown [Glycine max]		Glyma08g17810	109.71	29.11	-1.91411	gi|255641784|gb|ACU21161.1|/1.93453e-128/unknown [Glycine max]		Glyma14g30050	1.23	7.94	2.69048	gi|255638727|gb|ACU19668.1|/3.37546e-144/unknown [Glycine max]		Glyma13g40940	113.83	52.4	-1.11924	gi|255626369|gb|ACU13529.1|/1.83257e-43/unknown [Glycine max]
Glyma02g06460	2.98	12.36	2.05229	gi|217074938|gb|ACJ85829.1|/0/unknown [Medicago truncatula]		Glyma08g02590	21.74	6.52	-1.73741	gi|255638027|gb|ACU19328.1|/9.65691e-103/unknown [Glycine max]		Glyma12g33110	1.09	5.4	2.30863	gi|255639433|gb|ACU20011.1|/2.43054e-124/unknown [Glycine max]		Glyma10g00470	43.97	16.55	-1.40969	gi|255631314|gb|ACU16024.1|/1.35767e-79/unknown [Glycine max]		Glyma08g12480	2.37	9.41	1.98931	gi|255642372|gb|ACU21450.1|/0/unknown [Glycine max]		Glyma13g10440	9.83	2.61	-1.91314	gi|255640669|gb|ACU20619.1|/4.36534e-42/unknown [Glycine max]		Glyma09g33770	33.25	214.38	2.68874	gi|217072374|gb|ACJ84547.1|/1.86167e-106/unknown [Medicago truncatula]		Glyma11g15120	19.18	8.82	-1.12075	gi|255647140|gb|ACU24038.1|/4.01496e-51/unknown [Glycine max]
Glyma09g07070	3.86	15.87	2.03963	gi|255645885|gb|ACU23432.1|/4.11162e-144/unknown [Glycine max]		Glyma19g36560	13.85	4.18	-1.72831	gi|255642407|gb|ACU21467.1|/1.71478e-57/unknown [Glycine max]		Glyma04g15330	1.27	6.27	2.30364	gi|255635343|gb|ACU18025.1|/1.10283e-153/unknown [Glycine max]		Glyma11g09700	10.18	3.83	-1.41032	gi|255636643|gb|ACU18659.1|/0/unknown [Glycine max]		Glyma17g09170	1.64	6.45	1.9756	gi|255639859|gb|ACU20222.1|/0/unknown [Glycine max]		Glyma04g05870	27.29	7.32	-1.89846	gi|255640642|gb|ACU20606.1|/1.85937e-120/unknown [Glycine max]		Glyma18g48610	5.1	32.82	2.68601	gi|255637404|gb|ACU19030.1|/2.51323e-109/unknown [Glycine max]		Glyma08g25020	51.2	23.47	-1.12533	gi|255647200|gb|ACU24068.1|/1.53393e-99/unknown [Glycine max]
Glyma14g39050	3.86	15.87	2.03963	gi|255635258|gb|ACU17983.1|/0/unknown [Glycine max]		Glyma11g15200	97.82	29.74	-1.71772	gi|255634955|gb|ACU17836.1|/1.47042e-139/unknown [Glycine max]		Glyma17g17790	1.27	6.27	2.30364	gi|255638871|gb|ACU19738.1|/0/unknown [Glycine max]		Glyma06g18500	9.27	3.48	-1.41348	gi|255644673|gb|ACU22839.1|/0/unknown [Glycine max]		Glyma15g40450	3.46	13.6	1.97476	gi|255626523|gb|ACU13606.1|/3.31798e-61/unknown [Glycine max]		Glyma15g11140	76.24	20.57	-1.89001	gi|255648351|gb|ACU24627.1|/4.31063e-104/unknown [Glycine max]		Glyma17g03330	2.46	15.53	2.65833	gi|255630496|gb|ACU15606.1|/2.58322e-86/unknown [Glycine max]		Glyma06g48030	117.17	53.64	-1.12722	gi|255626045|gb|ACU13367.1|/1.03195e-84/unknown [Glycine max]
Glyma13g19500	52.06	211.51	2.02248	gi|255632298|gb|ACU16507.1|/6.9899e-99/unknown [Glycine max]		Glyma05g30290	23.67	7.35	-1.68724	gi|255645488|gb|ACU23239.1|/2.49006e-173/unknown [Glycine max]		Glyma17g37760	25.26	124.52	2.30145	gi|255629313|gb|ACU15001.1|/8.62711e-45/unknown [Glycine max]		Glyma11g21020	39.98	14.98	-1.41624	gi|255626867|gb|ACU13778.1|/2.67894e-105/unknown [Glycine max]		Glyma07g02580	1.82	7.15	1.974	gi|255644481|gb|ACU22744.1|/4.16034e-148/unknown [Glycine max]		Glyma20g04490	29.66	8.02	-1.88684	gi|255631464|gb|ACU16099.1|/3.67861e-138/unknown [Glycine max]		Glyma19g00710	3.52	21.7	2.62405	gi|255628443|gb|ACU14566.1|/9.2862e-28/unknown [Glycine max]		Glyma03g37340	36.24	16.59	-1.12727	gi|255626631|gb|ACU13660.1|/4.54685e-80/unknown [Glycine max]
Glyma19g05720	2.28	9.19	2.01103	gi|255646457|gb|ACU23707.1|/7.1013e-160/unknown [Glycine max]		Glyma05g37910	31.2	9.69	-1.68698	gi|255641266|gb|ACU20910.1|/1.00162e-108/unknown [Glycine max]		Glyma11g06830	6.54	32.05	2.29296	gi|255625655|gb|ACU13172.1|/1.97331e-105/unknown [Glycine max]		Glyma05g03890	14.54	5.4	-1.429	gi|255639123|gb|ACU19861.1|/0/unknown [Glycine max]		Glyma02g47910	9.64	37.48	1.95902	gi|255646897|gb|ACU23918.1|/2.95419e-61/unknown [Glycine max]		Glyma09g41320	8.37	2.27	-1.88254	gi|21554071|gb|AAM63152.1|/0/unknown [Arabidopsis thaliana]		Glyma03g25640	0.7	4.23	2.59523	gi|255626323|gb|ACU13506.1|/1.68016e-102/unknown [Glycine max]		Glyma04g07060	16.19	7.41	-1.12756	gi|255646435|gb|ACU23696.1|/2.95699e-161/unknown [Glycine max]
Glyma18g45920	4.73	19.05	2.00988	gi|255629968|gb|ACU15336.1|/2.4628e-23/unknown [Glycine max]		Glyma13g38560	12.27	3.84	-1.67596	gi|255632374|gb|ACU16537.1|/3.86013e-70/unknown [Glycine max]		Glyma07g38780	2.36	11.49	2.28352	gi|255640366|gb|ACU20471.1|/1.34987e-52/unknown [Glycine max]		Glyma20g26770	41.79	15.5	-1.43089	gi|217071736|gb|ACJ84228.1|/6.02344e-178/unknown [Medicago truncatula]		Glyma13g18930	5.64	21.79	1.9499	gi|255628701|gb|ACU14695.1|/1.7662e-89/unknown [Glycine max]		Glyma05g02890	8.37	2.27	-1.88254	gi|255641960|gb|ACU21247.1|/0/unknown [Glycine max]		Glyma12g00860	1.58	9.53	2.59255	gi|255647895|gb|ACU24406.1|/1.22429e-130/unknown [Glycine max]		Glyma08g04070	16.19	7.41	-1.12756	gi|255647718|gb|ACU24320.1|/7.01772e-154/unknown [Glycine max]
Glyma17g06540	5.96	23.89	2.00302	gi|255642191|gb|ACU21360.1|/3.42461e-40/unknown [Glycine max]		Glyma18g01330	269.61	85.21	-1.66178	gi|255647735|gb|ACU24328.1|/3.50722e-172/unknown [Glycine max]		Glyma18g04660	2.36	11.49	2.28352	gi|255645255|gb|ACU23125.1|/0/unknown [Glycine max]		Glyma20g26140	134.47	49.81	-1.43278	gi|255640808|gb|ACU20687.1|/3.79891e-72/unknown [Glycine max]		Glyma11g11750	2.73	10.46	1.93791	gi|255639021|gb|ACU19811.1|/0/unknown [Glycine max]		Glyma15g03110	61.68	16.73	-1.88237	gi|255642339|gb|ACU21434.1|/0/unknown [Glycine max]		Glyma06g12900	2.64	15.88	2.5886	gi|255633476|gb|ACU17096.1|/3.45544e-140/unknown [Glycine max]		Glyma04g16720	11.96	5.47	-1.1286	gi|255641234|gb|ACU20894.1|/1.45154e-34/unknown [Glycine max]
Glyma10g44190	4.38	17.38	1.98843	gi|255639685|gb|ACU20136.1|/5.4209e-176/unknown [Glycine max]		Glyma02g14400	8.41	2.67	-1.65527	gi|255637288|gb|ACU18974.1|/6.65991e-27/unknown [Glycine max]		Glyma04g16880	6.72	32.57	2.27701	gi|255628679|gb|ACU14684.1|/1.82582e-13/unknown [Glycine max]		Glyma19g43530	25.44	9.4	-1.43637	gi|255627225|gb|ACU13957.1|/2.39022e-64/unknown [Glycine max]		Glyma20g33580	7.46	28.41	1.92915	gi|255637648|gb|ACU19148.1|/3.24978e-118/unknown [Glycine max]		Glyma08g20460	6.37	1.74	-1.87221	gi|255641206|gb|ACU20880.1|/5.95944e-138/unknown [Glycine max]		Glyma18g41340	1.76	10.41	2.56432	gi|255630919|gb|ACU15822.1|/9.30028e-115/unknown [Glycine max]		Glyma06g12540	11.96	5.47	-1.1286	gi|118485999|gb|ABK94843.1|/0/unknown [Populus trichocarpa]
Glyma13g31580	68.72	272.66	1.9883	gi|255636427|gb|ACU18552.1|/1.78156e-137/unknown [Glycine max]		Glyma05g36310	19.46	6.18	-1.65483	gi|255647368|gb|ACU24150.1|/1.35068e-178/unknown [Glycine max]		Glyma08g09200	26.53	127.49	2.26469	gi|255627103|gb|ACU13896.1|/1.30498e-60/unknown [Glycine max]		Glyma11g13290	22.17	8.19	-1.43667	gi|255630627|gb|ACU15673.1|/1.54063e-31/unknown [Glycine max]		Glyma15g41850	8.55	32.25	1.9153	gi|255639869|gb|ACU20227.1|/0/unknown [Glycine max]		Glyma06g12340	44.03	12.03	-1.87185	gi|255648179|gb|ACU24543.1|/2.47386e-179/unknown [Glycine max]		Glyma04g06230	1.06	6.18	2.54354	gi|255625735|gb|ACU13212.1|/7.14776e-55/unknown [Glycine max]		Glyma08g15460	51.73	23.64	-1.12977	gi|255640318|gb|ACU20447.1|/2.49374e-107/unknown [Glycine max]
Glyma15g14970	5.61	22.22	1.98579	gi|255632372|gb|ACU16536.1|/1.26866e-38/unknown [Glycine max]		Glyma15g06780	612.84	196.31	-1.64238	gi|255630145|gb|ACU15426.1|/2.39659e-75/unknown [Glycine max]		Glyma13g43170	1.09	5.22	2.25972	gi|255639315|gb|ACU19955.1|/0/unknown [Glycine max]		Glyma15g01160	41.98	15.5	-1.43743	gi|255631774|gb|ACU16254.1|/1.17248e-93/unknown [Glycine max]		Glyma07g37430	5.64	21.09	1.90279	gi|255648267|gb|ACU24586.1|/4.75034e-108/unknown [Glycine max]		Glyma08g22690	8.92	2.44	-1.87016	gi|255640356|gb|ACU20466.1|/8.3452e-123/unknown [Glycine max]		Glyma02g47760	0.88	5.12	2.54057	gi|255628499|gb|ACU14594.1|/3.05153e-77/unknown [Glycine max]		Glyma04g36460	39.41	18	-1.13056	gi|217074920|gb|ACJ85820.1|/0/unknown [Medicago truncatula]
Glyma08g13360	6.66	26.23	1.97762	gi|255627019|gb|ACU13854.1|/7.95904e-77/unknown [Glycine max]		Glyma05g24730	12.45	4.01	-1.63447	gi|255633690|gb|ACU17205.1|/6.50107e-65/unknown [Glycine max]		Glyma01g02210	9.63	45.63	2.24437	gi|255627087|gb|ACU13888.1|/3.3946e-70/unknown [Glycine max]		Glyma19g35770	103.4	38.14	-1.43886	gi|255630744|gb|ACU15733.1|/2.37371e-85/unknown [Glycine max]		Glyma03g31580	12.01	44.8	1.89926	gi|255631268|gb|ACU16001.1|/4.46894e-42/unknown [Glycine max]		Glyma03g34510	10.19	2.79	-1.86882	gi|255641068|gb|ACU20813.1|/0/unknown [Glycine max]		Glyma12g03280	35.71	207.5	2.53871	gi|255628319|gb|ACU14504.1|/1.89657e-88/unknown [Glycine max]		Glyma15g00350	42.93	19.59	-1.13187	gi|255646060|gb|ACU23517.1|/0/unknown [Glycine max]
Glyma20g23430	3.86	15.2	1.9774	gi|255634765|gb|ACU17744.1|/1.04251e-149/unknown [Glycine max]		Glyma07g31770	8.24	2.67	-1.6258	gi|255646492|gb|ACU23724.1|/2.37966e-47/unknown [Glycine max]		Glyma20g27880	3.09	14.63	2.24325	gi|255648365|gb|ACU24633.1|/5.19555e-165/unknown [Glycine max]		Glyma01g01310	9.99	3.66	-1.44864	gi|255636596|gb|ACU18636.1|/9.23217e-117/unknown [Glycine max]		Glyma12g07610	2.55	9.41	1.8837	gi|255631016|gb|ACU15872.1|/6.02596e-47/unknown [Glycine max]		Glyma09g29160	12.74	3.49	-1.86807	gi|255644854|gb|ACU22927.1|/3.49668e-160/unknown [Glycine max]		Glyma06g14680	0.7	4.06	2.53605	gi|255626445|gb|ACU13567.1|/5.29507e-34/unknown [Glycine max]		Glyma20g27850	13.55	6.18	-1.13261	gi|255631780|gb|ACU16257.1|/2.37201e-100/unknown [Glycine max]
Glyma20g06680	6.84	26.9	1.97554	gi|255648121|gb|ACU24515.1|/4.54617e-100/unknown [Glycine max]		Glyma18g50800	22.61	7.35	-1.62114	gi|255631956|gb|ACU16358.1|/2.42797e-42/unknown [Glycine max]		Glyma07g00970	3.27	15.33	2.229	gi|217074730|gb|ACJ85725.1|/0/unknown [Medicago truncatula]		Glyma09g07920	83.41	30.48	-1.45236	gi|217071526|gb|ACJ84123.1|/1.71053e-92/unknown [Medicago truncatula]		Glyma20g38820	3.28	12.03	1.87487	gi|255646338|gb|ACU23652.1|/0/unknown [Glycine max]		Glyma09g28220	34.02	9.41	-1.85412	gi|255632103|gb|ACU16404.1|/9.38353e-28/unknown [Glycine max]		Glyma12g31750	1.06	6	2.5009	gi|255628385|gb|ACU14537.1|/1.63638e-76/unknown [Glycine max]		Glyma04g14710	23.22	10.59	-1.13267	gi|255627755|gb|ACU14222.1|/8.28221e-75/unknown [Glycine max]
Glyma15g41170	6.84	26.9	1.97554	gi|255645309|gb|ACU23151.1|/6.80959e-120/unknown [Glycine max]		Glyma15g09700	95.71	31.41	-1.60745	gi|255642503|gb|ACU21515.1|/0/unknown [Glycine max]		Glyma19g40960	3.27	15.33	2.229	gi|255647887|gb|ACU24402.1|/3.25448e-164/unknown [Glycine max]		Glyma01g41210	67.96	24.73	-1.45842	gi|255627121|gb|ACU13905.1|/8.91075e-48/unknown [Glycine max]		Glyma08g18510	36.75	134.75	1.87447	gi|255626243|gb|ACU13466.1|/1.22644e-61/unknown [Glycine max]		Glyma13g28590	189.95	52.99	-1.84183	gi|255627533|gb|ACU14111.1|/1.61188e-68/unknown [Glycine max]		Glyma18g53080	1.06	6	2.5009	gi|255629003|gb|ACU14846.1|/2.28362e-64/unknown [Glycine max]		Glyma01g39580	19.35	8.82	-1.13348	gi|255626983|gb|ACU13836.1|/2.7829e-92/unknown [Glycine max]
Glyma19g26640	2.98	11.69	1.97189	gi|255635064|gb|ACU17890.1|/4.63863e-67/unknown [Glycine max]		Glyma02g41840	10.69	3.51	-1.60672	gi|255642291|gb|ACU21410.1|/2.5407e-130/unknown [Glycine max]		Glyma07g16690	5.27	24.56	2.22044	gi|255631730|gb|ACU16232.1|/3.85625e-59/unknown [Glycine max]		Glyma13g44230	11.99	4.35	-1.46274	gi|255642199|gb|ACU21364.1|/1.1355e-102/unknown [Glycine max]		Glyma04g02000	3.46	12.55	1.85884	gi|255641632|gb|ACU21088.1|/1.08651e-162/unknown [Glycine max]		Glyma02g46140	23.65	6.62	-1.83694	gi|255639475|gb|ACU20032.1|/3.10165e-180/unknown [Glycine max]		Glyma20g16920	1.94	10.94	2.49548	gi|255626435|gb|ACU13562.1|/1.32222e-118/unknown [Glycine max]		Glyma15g43150	111.54	50.82	-1.13409	gi|255640179|gb|ACU20380.1|/0/unknown [Glycine max]
Glyma11g08100	3.51	13.7	1.96463	gi|255648135|gb|ACU24522.1|/1.69859e-120/unknown [Glycine max]		Glyma14g21160	9.64	3.17	-1.60455	gi|255636576|gb|ACU18626.1|/4.18666e-61/unknown [Glycine max]		Glyma20g33580	6.18	28.74	2.21738	gi|255637648|gb|ACU19148.1|/3.24978e-118/unknown [Glycine max]		Glyma10g35110	16.35	5.92	-1.46562	gi|255627351|gb|ACU14020.1|/2.9956e-32/unknown [Glycine max]		Glyma10g36650	4.37	15.69	1.84414	gi|255645705|gb|ACU23346.1|/7.33067e-63/unknown [Glycine max]		Glyma12g23170	14.92	4.18	-1.83567	gi|255628927|gb|ACU14808.1|/5.83067e-27/unknown [Glycine max]		Glyma14g38730	1.58	8.82	2.48085	gi|217072738|gb|ACJ84729.1|/2.13445e-130/unknown [Medicago truncatula]		Glyma11g25860	53.13	24.17	-1.13631	gi|255635858|gb|ACU18276.1|/1.21418e-56/unknown [Glycine max]
Glyma01g28780	2.1	8.19	1.96347	gi|255642219|gb|ACU21374.1|/6.97644e-72/unknown [Glycine max]		Glyma13g07650	8.06	2.67	-1.59394	gi|255630929|gb|ACU15827.1|/3.77871e-99/unknown [Glycine max]		Glyma11g04520	7.63	35.35	2.21196	gi|255629926|gb|ACU15315.1|/2.25996e-15/unknown [Glycine max]		Glyma12g36400	16.35	5.92	-1.46562	gi|255642497|gb|ACU21512.1|/1.20966e-177/unknown [Glycine max]		Glyma20g37800	2	7.15	1.83794	gi|255642335|gb|ACU21432.1|/3.01241e-137/unknown [Glycine max]		Glyma05g22760	10.55	2.96	-1.83357	gi|255629948|gb|ACU15326.1|/1.45114e-85/unknown [Glycine max]		Glyma18g42870	1.06	5.82	2.45695	gi|255646439|gb|ACU23698.1|/2.85748e-29/unknown [Glycine max]		Glyma05g02800	252.64	114.86	-1.13721	gi|255636284|gb|ACU18482.1|/1.87066e-124/unknown [Glycine max]
Glyma18g02920	6.14	23.89	1.9601	gi|255646665|gb|ACU23806.1|/6.49704e-89/unknown [Glycine max]		Glyma03g28730	89.75	30.07	-1.57759	gi|255638266|gb|ACU19446.1|/1.91219e-48/unknown [Glycine max]		Glyma15g08080	2	9.23	2.20633	gi|255626237|gb|ACU13463.1|/4.69906e-76/unknown [Glycine max]		Glyma20g27280	37.8	13.58	-1.4769	gi|255638545|gb|ACU19580.1|/0/unknown [Glycine max]		Glyma02g07180	2.55	9.06	1.82901	gi|255627211|gb|ACU13950.1|/1.51999e-103/unknown [Glycine max]		Glyma08g15450	11.1	3.14	-1.82172	gi|255645955|gb|ACU23466.1|/6.71055e-101/unknown [Glycine max]		Glyma01g32130	2.99	16.41	2.45636	gi|255630601|gb|ACU15660.1|/6.17928e-64/unknown [Glycine max]		Glyma05g05260	24.46	11.12	-1.13727	gi|255636244|gb|ACU18462.1|/1.62198e-112/unknown [Glycine max]
Glyma08g46630	5.08	19.71	1.95603	gi|255647188|gb|ACU24062.1|/6.12017e-154/unknown [Glycine max]		Glyma07g32690	24.72	8.35	-1.56583	gi|255644894|gb|ACU22947.1|/3.2238e-127/unknown [Glycine max]		Glyma07g03700	11.63	53.64	2.20546	gi|255640540|gb|ACU20555.1|/5.34881e-56/unknown [Glycine max]		Glyma04g17650	20.9	7.49	-1.48047	gi|255630988|gb|ACU15858.1|/2.51432e-67/unknown [Glycine max]		Glyma13g21840	5.82	20.57	1.82145	gi|255628793|gb|ACU14741.1|/2.12662e-42/unknown [Glycine max]		Glyma09g36930	37.48	10.63	-1.81798	gi|255628613|gb|ACU14651.1|/3.45467e-93/unknown [Glycine max]		Glyma10g02180	2.64	14.47	2.45446	gi|255629593|gb|ACU15144.1|/1.51443e-86/unknown [Glycine max]		Glyma10g06450	43.1	19.59	-1.13757	gi|255631886|gb|ACU16310.1|/4.03731e-60/unknown [Glycine max]
Glyma20g27880	7.19	27.57	1.93904	gi|255648365|gb|ACU24633.1|/5.19555e-165/unknown [Glycine max]		Glyma20g37190	144.27	48.78	-1.56441	gi|255642159|gb|ACU21344.1|/4.03036e-50/unknown [Glycine max]		Glyma12g06690	3.82	17.42	2.1891	gi|255641929|gb|ACU21233.1|/0/unknown [Glycine max]		Glyma19g00950	84.68	30.3	-1.4827	gi|255625689|gb|ACU13189.1|/3.58153e-97/unknown [Glycine max]		Glyma02g06830	2.73	9.59	1.81263	gi|255634951|gb|ACU17834.1|/2.90147e-173/unknown [Glycine max]		Glyma15g42150	33.48	9.59	-1.8037	gi|255640969|gb|ACU20764.1|/8.29475e-148/unknown [Glycine max]		Glyma11g13130	1.58	8.65	2.45278	gi|255637675|gb|ACU19161.1|/1.26524e-32/unknown [Glycine max]		Glyma20g05520	16.71	7.59	-1.13854	gi|255640338|gb|ACU20457.1|/4.5177e-115/unknown [Glycine max]
Glyma12g01810	2.1	8.02	1.93321	gi|255632470|gb|ACU16585.1|/1.22269e-60/unknown [Glycine max]		Glyma13g28700	10.34	3.51	-1.55869	gi|255646865|gb|ACU23903.1|/9.75766e-150/unknown [Glycine max]		Glyma01g37560	2.36	10.62	2.16993	gi|255642147|gb|ACU21338.1|/4.22209e-123/unknown [Glycine max]		Glyma10g30340	18.53	6.62	-1.48496	gi|255630943|gb|ACU15834.1|/1.04766e-115/unknown [Glycine max]		Glyma17g04540	4.37	15.34	1.81159	gi|255644530|gb|ACU22768.1|/0/unknown [Glycine max]		Glyma14g38600	29.66	8.54	-1.79621	gi|255637249|gb|ACU18955.1|/1.08591e-144/unknown [Glycine max]		Glyma01g02210	3.34	18.17	2.44364	gi|255627087|gb|ACU13888.1|/3.3946e-70/unknown [Glycine max]		Glyma02g37120	214.82	97.57	-1.13862	gi|255641583|gb|ACU21064.1|/5.01135e-144/unknown [Glycine max]
Glyma01g43070	1.75	6.68	1.93249	gi|255633876|gb|ACU17299.1|/1.41596e-42/unknown [Glycine max]		Glyma05g36960	39.27	13.37	-1.55443	gi|255626215|gb|ACU13452.1|/1.13314e-65/unknown [Glycine max]		Glyma20g18290	1.82	8.19	2.16993	gi|255626265|gb|ACU13477.1|/4.24516e-114/unknown [Glycine max]		Glyma02g04200	12.72	4.53	-1.48952	gi|255638241|gb|ACU19434.1|/9.1727e-131/unknown [Glycine max]		Glyma14g10200	2.55	8.89	1.80169	gi|255646086|gb|ACU23530.1|/4.15877e-64/unknown [Glycine max]		Glyma10g38470	9.64	2.79	-1.78877	gi|255629859|gb|ACU15280.1|/2.46015e-53/unknown [Glycine max]		Glyma05g34490	12.49	67.93	2.44328	gi|255632031|gb|ACU16368.1|/3.54704e-113/unknown [Glycine max]		Glyma13g05090	27.97	12.7	-1.13905	gi|255647138|gb|ACU24037.1|/1.55327e-107/unknown [Glycine max]
Glyma10g39610	1.75	6.68	1.93249	gi|255639291|gb|ACU19943.1|/0/unknown [Glycine max]		Glyma13g17380	9.29	3.17	-1.5512	gi|255633130|gb|ACU16920.1|/1.23685e-87/unknown [Glycine max]		Glyma06g12900	10.36	46.33	2.16092	gi|255633476|gb|ACU17096.1|/3.45544e-140/unknown [Glycine max]		Glyma01g32070	20.53	7.31	-1.48979	gi|255631736|gb|ACU16235.1|/2.51323e-109/unknown [Glycine max]		Glyma05g28310	3.46	12.03	1.79779	gi|255646693|gb|ACU23820.1|/2.33218e-165/unknown [Glycine max]		Glyma17g15680	848.23	245.61	-1.78809	gi|255648310|gb|ACU24607.1|/1.37369e-146/unknown [Glycine max]		Glyma07g37280	4.22	22.94	2.44255	gi|255632051|gb|ACU16378.1|/1.20622e-86/unknown [Glycine max]		Glyma09g37280	24.1	10.94	-1.13942	gi|255646044|gb|ACU23509.1|/1.59675e-142/unknown [Glycine max]
Glyma01g04360	1.58	6.01	1.92744	gi|255647293|gb|ACU24113.1|/0/unknown [Glycine max]		Glyma06g44990	11.22	3.84	-1.54689	gi|255646173|gb|ACU23572.1|/0/unknown [Glycine max]		Glyma17g05690	6	26.82	2.16027	gi|255632800|gb|ACU16753.1|/1.63491e-96/unknown [Glycine max]		Glyma11g33040	445.02	157.79	-1.49586	gi|255627055|gb|ACU13872.1|/2.65699e-95/unknown [Glycine max]		Glyma19g36130	6.37	22.14	1.79729	gi|255639489|gb|ACU20039.1|/2.88342e-135/unknown [Glycine max]		Glyma19g36560	7.82	2.27	-1.78448	gi|255642407|gb|ACU21467.1|/1.71478e-57/unknown [Glycine max]		Glyma07g16750	11.44	61.93	2.43655	gi|255626317|gb|ACU13503.1|/3.37674e-41/unknown [Glycine max]		Glyma06g13910	12.84	5.82	-1.14155	gi|255631024|gb|ACU15876.1|/2.96057e-52/unknown [Glycine max]
Glyma17g34650	1.58	6.01	1.92744	gi|255646921|gb|ACU23930.1|/0/unknown [Glycine max]		Glyma12g36400	12.62	4.34	-1.53994	gi|255642497|gb|ACU21512.1|/1.20966e-177/unknown [Glycine max]		Glyma15g14760	2.73	12.19	2.15873	gi|255631310|gb|ACU16022.1|/2.0896e-55/unknown [Glycine max]		Glyma09g01720	8.36	2.96	-1.49791	gi|255627355|gb|ACU14022.1|/1.98472e-87/unknown [Glycine max]		Glyma18g53300	2.37	8.19	1.78898	gi|255632604|gb|ACU16652.1|/6.68543e-80/unknown [Glycine max]		Glyma01g37250	127	36.95	-1.78118	gi|255633344|gb|ACU17029.1|/1.16217e-138/unknown [Glycine max]		Glyma12g36750	0.88	4.76	2.43539	gi|255647793|gb|ACU24357.1|/2.19926e-129/unknown [Glycine max]		Glyma15g03210	18.3	8.29	-1.1424	gi|255641843|gb|ACU21190.1|/6.92993e-38/unknown [Glycine max]
Glyma11g36900	15.08	56.97	1.91757	gi|255631252|gb|ACU15993.1|/1.77112e-56/unknown [Glycine max]		Glyma13g02960	70.12	24.22	-1.53363	gi|255645408|gb|ACU23200.1|/0/unknown [Glycine max]		Glyma03g32440	1.64	7.31	2.15618	gi|255648075|gb|ACU24492.1|/5.72615e-103/unknown [Glycine max]		Glyma13g23700	16.72	5.92	-1.49791	gi|255647781|gb|ACU24351.1|/2.60923e-99/unknown [Glycine max]		Glyma12g20830	6.37	21.96	1.78551	gi|255631412|gb|ACU16073.1|/3.83168e-50/unknown [Glycine max]		Glyma05g23240	8.92	2.61	-1.77299	gi|255640006|gb|ACU20294.1|/5.43759e-60/unknown [Glycine max]		Glyma10g03070	5.81	31.41	2.43461	gi|255638147|gb|ACU19387.1|/4.4952e-132/unknown [Glycine max]		Glyma20g24580	30.79	13.94	-1.14323	gi|255627011|gb|ACU13850.1|/1.08249e-45/unknown [Glycine max]
Glyma02g03530	3.51	13.2	1.91099	gi|217071620|gb|ACJ84170.1|/9.87113e-56/unknown [Medicago truncatula]		Glyma13g09550	27.52	9.52	-1.53145	gi|255630633|gb|ACU15676.1|/2.2436e-63/unknown [Glycine max]		Glyma09g00950	1.64	7.31	2.15618	gi|255640618|gb|ACU20594.1|/1.16392e-91/unknown [Glycine max]		Glyma10g43730	65.6	23.16	-1.50206	gi|255627415|gb|ACU14052.1|/5.83474e-115/unknown [Glycine max]		Glyma15g15380	5.28	18.13	1.77977	gi|255631550|gb|ACU16142.1|/8.00015e-48/unknown [Glycine max]		Glyma09g38320	16.01	4.71	-1.76517	gi|255632542|gb|ACU16621.1|/8.84541e-104/unknown [Glycine max]		Glyma17g32910	3.69	19.94	2.43397	gi|255639667|gb|ACU20127.1|/0/unknown [Glycine max]		Glyma09g15680	133.54	60.34	-1.14609	gi|255640486|gb|ACU20529.1|/2.48063e-104/unknown [Glycine max]
Glyma11g12670	5.61	21.05	1.90775	gi|255647731|gb|ACU24326.1|/1.83933e-166/unknown [Glycine max]		Glyma14g37170	7.71	2.67	-1.52989	gi|255641891|gb|ACU21214.1|/0/unknown [Glycine max]		Glyma03g35400	2	8.88	2.15056	gi|255640840|gb|ACU20703.1|/1.01941e-73/unknown [Glycine max]		Glyma07g39190	64.69	22.82	-1.50324	gi|255647916|gb|ACU24416.1|/0/unknown [Glycine max]		Glyma09g38590	2.91	9.94	1.77223	gi|217075364|gb|ACJ86042.1|/1.50365e-47/unknown [Medicago truncatula]		Glyma14g15370	8.19	2.44	-1.74698	gi|255646477|gb|ACU23717.1|/2.32501e-26/unknown [Glycine max]		Glyma12g04670	16.71	89.1	2.41471	gi|255646074|gb|ACU23524.1|/0/unknown [Glycine max]		Glyma15g10820	67.21	30.35	-1.14698	gi|255638045|gb|ACU19337.1|/1.17941e-116/unknown [Glycine max]
Glyma20g22790	2.28	8.52	1.90182	gi|217072640|gb|ACJ84680.1|/1.97586e-140/unknown [Medicago truncatula]		Glyma03g13780	32.25	11.19	-1.52709	gi|255644920|gb|ACU22960.1|/5.22593e-165/unknown [Glycine max]		Glyma01g00730	7.09	31.35	2.14461	gi|255638590|gb|ACU19602.1|/5.18179e-116/unknown [Glycine max]		Glyma08g45120	20.35	7.14	-1.51103	gi|255641634|gb|ACU21089.1|/1.97737e-138/unknown [Glycine max]		Glyma05g09270	3.82	12.9	1.75573	gi|255626467|gb|ACU13578.1|/1.37462e-114/unknown [Glycine max]		Glyma08g04460	19.29	5.75	-1.74622	gi|118489716|gb|ABK96659.1|/2.56839e-171/unknown [Populus trichocarpa x Populus deltoides]		Glyma10g29180	1.06	5.65	2.41419	gi|255634799|gb|ACU17760.1|/3.56899e-149/unknown [Glycine max]		Glyma02g14140	33.6	15.17	-1.14724	gi|255640979|gb|ACU20769.1|/1.59922e-171/unknown [Glycine max]
Glyma18g02670	1.58	5.85	1.88851	gi|255637418|gb|ACU19037.1|/1.40824e-133/unknown [Glycine max]		Glyma06g02590	20.69	7.18	-1.52688	gi|255641397|gb|ACU20975.1|/2.53557e-74/unknown [Glycine max]		Glyma07g07270	1.82	8.01	2.13786	gi|255635137|gb|ACU17925.1|/0/unknown [Glycine max]		Glyma13g11090	18.9	6.62	-1.51348	gi|255644756|gb|ACU22880.1|/2.19318e-27/unknown [Glycine max]		Glyma04g08410	26.56	89.6	1.75424	gi|255638370|gb|ACU19496.1|/2.31709e-157/unknown [Glycine max]		Glyma17g19920	30.38	9.06	-1.74554	gi|255648036|gb|ACU24474.1|/1.69035e-164/unknown [Glycine max]		Glyma17g15860	1.06	5.65	2.41419	gi|255639129|gb|ACU19864.1|/7.55854e-142/unknown [Glycine max]		Glyma02g17140	21.11	9.53	-1.14738	gi|255631588|gb|ACU16161.1|/1.18645e-40/unknown [Glycine max]
Glyma05g35940	12.27	45.28	1.88374	gi|255631121|gb|ACU15926.1|/4.0253e-62/unknown [Glycine max]		Glyma18g51640	44.53	15.54	-1.51879	gi|255630968|gb|ACU15848.1|/3.99206e-57/unknown [Glycine max]		Glyma01g44730	8.72	38.32	2.1357	gi|255636312|gb|ACU18495.1|/2.70445e-74/unknown [Glycine max]		Glyma11g09860	10.54	3.66	-1.52596	gi|255639313|gb|ACU19954.1|/5.3226e-107/unknown [Glycine max]		Glyma04g05800	18.01	60.66	1.75195	gi|255625663|gb|ACU13176.1|/1.63619e-60/unknown [Glycine max]		Glyma18g48480	8.73	2.61	-1.74193	gi|255631756|gb|ACU16245.1|/8.25525e-101/unknown [Glycine max]		Glyma06g43630	1.76	9.35	2.40939	gi|255642533|gb|ACU21530.1|/0/unknown [Glycine max]		Glyma19g00270	172.24	77.63	-1.14973	gi|255646451|gb|ACU23704.1|/0/unknown [Glycine max]
Glyma11g10700	2.45	9.02	1.88035	gi|255644918|gb|ACU22959.1|/7.00036e-175/unknown [Glycine max]		Glyma09g41100	10.52	3.68	-1.51536	gi|255635003|gb|ACU17860.1|/6.16734e-153/unknown [Glycine max]		Glyma12g04300	2.54	11.15	2.13414	gi|255628605|gb|ACU14647.1|/1.05401e-68/unknown [Glycine max]		Glyma08g17950	18.72	6.44	-1.53945	gi|255646441|gb|ACU23699.1|/1.79291e-120/unknown [Glycine max]		Glyma11g01010	24.02	80.88	1.75155	gi|255629944|gb|ACU15324.1|/2.87373e-70/unknown [Glycine max]		Glyma09g02790	159.93	47.94	-1.73814	gi|255628253|gb|ACU14471.1|/1.61747e-101/unknown [Glycine max]		Glyma06g47760	0.88	4.59	2.38292	gi|289540917|gb|ADD09589.1|/1.53955e-75/unknown [Trifolium repens]		Glyma02g01580	121.75	54.87	-1.14983	gi|217071008|gb|ACJ83864.1|/3.22671e-26/unknown [Medicago truncatula]
Glyma10g09720	24.19	88.71	1.87469	gi|255640630|gb|ACU20600.1|/5.32076e-40/unknown [Glycine max]		Glyma17g16130	27	9.52	-1.50393	gi|255628509|gb|ACU14599.1|/2.66614e-93/unknown [Glycine max]		Glyma20g22790	1.27	5.57	2.13285	gi|217072640|gb|ACJ84680.1|/1.97586e-140/unknown [Medicago truncatula]		Glyma05g28490	129.74	44.59	-1.54083	gi|255642128|gb|ACU21329.1|/0/unknown [Glycine max]		Glyma07g02240	2.18	7.32	1.74752	gi|255627007|gb|ACU13848.1|/5.77902e-55/unknown [Glycine max]		Glyma15g18360	74.42	22.31	-1.738	gi|255645885|gb|ACU23432.1|/1.03856e-175/unknown [Glycine max]		Glyma11g34350	0.88	4.59	2.38292	gi|255630103|gb|ACU15405.1|/3.03029e-122/unknown [Glycine max]		Glyma15g29630	12.14	5.47	-1.15016	gi|255635135|gb|ACU17924.1|/2.30335e-73/unknown [Glycine max]
Glyma05g26370	4.56	16.71	1.87361	gi|255642329|gb|ACU21429.1|/6.00145e-167/unknown [Glycine max]		Glyma08g12030	157.94	55.8	-1.50104	gi|255633192|gb|ACU16952.1|/1.55393e-54/unknown [Glycine max]		Glyma11g04590	3.63	15.85	2.12644	gi|255637627|gb|ACU19138.1|/1.89685e-73/unknown [Glycine max]		Glyma17g07690	360.88	123.83	-1.54316	gi|255647987|gb|ACU24450.1|/4.21523e-170/unknown [Glycine max]		Glyma03g06410	5.82	19.52	1.74586	gi|255631482|gb|ACU16108.1|/2.91684e-93/unknown [Glycine max]		Glyma12g00860	11.64	3.49	-1.73779	gi|255647895|gb|ACU24406.1|/1.22429e-130/unknown [Glycine max]		Glyma14g02980	1.23	6.35	2.3681	gi|255637255|gb|ACU18958.1|/4.87333e-149/unknown [Glycine max]		Glyma02g14400	13.72	6.18	-1.1506	gi|255637288|gb|ACU18974.1|/6.65991e-27/unknown [Glycine max]
Glyma03g34700	9.12	33.41	1.87317	gi|255628257|gb|ACU14473.1|/6.85811e-53/unknown [Glycine max]		Glyma11g08050	8.94	3.17	-1.49579	gi|255639237|gb|ACU19917.1|/2.88491e-137/unknown [Glycine max]		Glyma11g06030	2.36	10.28	2.12298	gi|255637247|gb|ACU18954.1|/4.24961e-89/unknown [Glycine max]		Glyma08g18080	17.26	5.92	-1.54376	gi|255646523|gb|ACU23739.1|/0/unknown [Glycine max]		Glyma12g04880	40.76	136.31	1.74167	gi|255632458|gb|ACU16579.1|/2.11834e-111/unknown [Glycine max]		Glyma16g06040	9.83	2.96	-1.73159	gi|255638737|gb|ACU19673.1|/2.50066e-131/unknown [Glycine max]		Glyma13g42210	13.37	68.99	2.36739	gi|255645658|gb|ACU23323.1|/1.15222e-166/unknown [Glycine max]		Glyma04g07610	20.76	9.35	-1.15077	gi|255644538|gb|ACU22772.1|/3.64483e-124/unknown [Glycine max]
Glyma17g02570	2.98	10.86	1.86564	gi|255635572|gb|ACU18136.1|/0/unknown [Glycine max]		Glyma02g45940	13.15	4.68	-1.49048	gi|255638849|gb|ACU19728.1|/0/unknown [Glycine max]		Glyma07g04010	7.63	33.09	2.11664	gi|255648399|gb|ACU24650.1|/1.64848e-96/unknown [Glycine max]		Glyma04g17710	19.81	6.79	-1.54475	gi|255630988|gb|ACU15858.1|/9.68121e-75/unknown [Glycine max]		Glyma18g46040	6	20.05	1.74057	gi|225016142|gb|ACN78966.1|/0/unknown [Glycine max]		Glyma01g07470	42.76	12.9	-1.72889	gi|255637700|gb|ACU19173.1|/8.78337e-91/unknown [Glycine max]		Glyma18g43830	3.87	19.94	2.36526	gi|255637843|gb|ACU19241.1|/6.77786e-55/unknown [Glycine max]		Glyma08g23830	183.15	82.4	-1.15231	gi|255625935|gb|ACU13312.1|/1.46322e-30/unknown [Glycine max]
Glyma14g05590	13.32	48.28	1.85783	gi|255641286|gb|ACU20920.1|/0/unknown [Glycine max]		Glyma11g25660	101.32	36.09	-1.48925	gi|255630988|gb|ACU15858.1|/1.56883e-64/unknown [Glycine max]		Glyma05g00910	30.53	132.36	2.11617	gi|255647180|gb|ACU24058.1|/8.67025e-139/unknown [Glycine max]		Glyma02g15000	10.18	3.48	-1.54858	gi|255626397|gb|ACU13543.1|/7.64778e-94/unknown [Glycine max]		Glyma09g03440	2.73	9.06	1.73061	gi|255646970|gb|ACU23954.1|/8.28669e-136/unknown [Glycine max]		Glyma03g29770	19.65	5.93	-1.72843	gi|255640350|gb|ACU20463.1|/5.31313e-46/unknown [Glycine max]		Glyma08g11070	17.77	91.04	2.35706	gi|255640724|gb|ACU20646.1|/1.44449e-66/unknown [Glycine max]		Glyma08g02270	18.83	8.47	-1.1526	gi|255645746|gb|ACU23366.1|/3.41896e-132/unknown [Glycine max]
Glyma0041s00350	4.03	14.53	1.85018	gi|255648240|gb|ACU24573.1|/6.09757e-106/unknown [Glycine max]		Glyma08g41960	101.85	36.92	-1.46397	gi|255625731|gb|ACU13210.1|/2.42729e-120/unknown [Glycine max]		Glyma07g16760	5.63	24.38	2.11449	gi|255629059|gb|ACU14874.1|/9.66814e-80/unknown [Glycine max]		Glyma06g24420	30.71	10.45	-1.55521	gi|255631054|gb|ACU15891.1|/2.18441e-21/unknown [Glycine max]		Glyma11g02140	2.73	9.06	1.73061	gi|255627593|gb|ACU14141.1|/9.8367e-60/unknown [Glycine max]		Glyma11g21650	18.38	5.58	-1.7198	gi|255647513|gb|ACU24220.1|/1.4229e-76/unknown [Glycine max]		Glyma18g49320	3.17	16.23	2.35611	gi|255637698|gb|ACU19172.1|/7.08172e-43/unknown [Glycine max]		Glyma13g01040	20.41	9.17	-1.15428	gi|255635086|gb|ACU17901.1|/9.8185e-151/unknown [Glycine max]
Glyma06g04140	4.03	14.53	1.85018	gi|255641316|gb|ACU20935.1|/0/unknown [Glycine max]		Glyma16g28970	21.56	7.85	-1.45759	gi|255642487|gb|ACU21507.1|/3.114e-154/unknown [Glycine max]		Glyma10g44190	1.45	6.27	2.11241	gi|255639685|gb|ACU20136.1|/5.4209e-176/unknown [Glycine max]		Glyma16g04380	231.14	78.55	-1.55708	gi|255639574|gb|ACU20081.1|/5.23344e-12/unknown [Glycine max]		Glyma16g21560	4.73	15.69	1.72993	gi|255641216|gb|ACU20885.1|/0/unknown [Glycine max]		Glyma12g24910	14.92	4.53	-1.71966	gi|255633452|gb|ACU17084.1|/8.4522e-65/unknown [Glycine max]		Glyma08g15450	0.88	4.41	2.3252	gi|255645955|gb|ACU23466.1|/6.71055e-101/unknown [Glycine max]		Glyma17g15720	60.52	27.17	-1.1554	gi|255635880|gb|ACU18287.1|/1.33766e-148/unknown [Glycine max]
Glyma16g23920	6.31	22.72	1.84825	gi|255637533|gb|ACU19093.1|/0/unknown [Glycine max]		Glyma09g40690	24.19	8.85	-1.45066	gi|217074426|gb|ACJ85573.1|/0/unknown [Medicago truncatula]		Glyma18g11010	10.72	46.33	2.11164	gi|217075238|gb|ACJ85979.1|/1.87417e-51/unknown [Medicago truncatula]		Glyma16g31990	14.36	4.88	-1.5571	gi|255629940|gb|ACU15322.1|/1.04259e-81/unknown [Glycine max]		Glyma02g36350	2.37	7.84	1.72597	gi|217074404|gb|ACJ85562.1|/0/unknown [Medicago truncatula]		Glyma02g47850	34.39	10.46	-1.71711	gi|255633784|gb|ACU17252.1|/3.82538e-36/unknown [Glycine max]		Glyma14g37780	4.93	24.7	2.32485	gi|255636552|gb|ACU18614.1|/0/unknown [Glycine max]		Glyma14g08490	53.48	24	-1.15597	gi|255627157|gb|ACU13923.1|/3.6271e-96/unknown [Glycine max]
Glyma10g43010	6.49	23.22	1.83908	gi|255632436|gb|ACU16568.1|/5.9341e-103/unknown [Glycine max]		Glyma08g17950	13.67	5.01	-1.44813	gi|255646441|gb|ACU23699.1|/1.79291e-120/unknown [Glycine max]		Glyma14g03800	4.36	18.64	2.096	gi|255640869|gb|ACU20717.1|/1.01261e-77/unknown [Glycine max]		Glyma06g20350	20.53	6.97	-1.5585	gi|217074616|gb|ACJ85668.1|/6.81047e-174/unknown [Medicago truncatula]		Glyma05g33300	11.46	37.65	1.71604	gi|255626451|gb|ACU13570.1|/3.80731e-67/unknown [Glycine max]		Glyma12g36330	46.4	14.12	-1.71638	gi|255626527|gb|ACU13608.1|/9.21065e-113/unknown [Glycine max]		Glyma11g12480	3.17	15.88	2.32466	gi|255625591|gb|ACU13140.1|/2.73849e-43/unknown [Glycine max]		Glyma04g33750	21.64	9.7	-1.15764	gi|255638203|gb|ACU19415.1|/1.579e-119/unknown [Glycine max]
Glyma18g00980	3.51	12.53	1.83584	gi|255630863|gb|ACU15794.1|/2.5723e-53/unknown [Glycine max]		Glyma09g32610	11.74	4.34	-1.43567	gi|255641547|gb|ACU21047.1|/1.1417e-62/unknown [Glycine max]		Glyma13g24420	3.63	15.5	2.09423	gi|217075142|gb|ACJ85931.1|/2.14849e-96/unknown [Medicago truncatula]		Glyma13g38560	8.72	2.96	-1.55873	gi|255632374|gb|ACU16537.1|/3.86013e-70/unknown [Glycine max]		Glyma18g10300	2.18	7.15	1.71362	gi|255625999|gb|ACU13344.1|/3.97287e-36/unknown [Glycine max]		Glyma08g19180	164.11	50.03	-1.7138	gi|255639780|gb|ACU20183.1|/0/unknown [Glycine max]		Glyma06g05560	2.99	14.82	2.30933	gi|255629327|gb|ACU15008.1|/8.14155e-118/unknown [Glycine max]		Glyma06g30350	21.64	9.7	-1.15764	gi|255636226|gb|ACU18454.1|/1.6425e-158/unknown [Glycine max]
Glyma17g04850	4.73	16.87	1.83455	gi|255629195|gb|ACU14942.1|/3.39593e-104/unknown [Glycine max]		Glyma19g37500	30.68	11.36	-1.43334	gi|255640689|gb|ACU20629.1|/3.98252e-103/unknown [Glycine max]		Glyma13g18490	2	8.53	2.09255	gi|255644569|gb|ACU22787.1|/6.03932e-107/unknown [Glycine max]		Glyma19g31260	8.72	2.96	-1.55873	gi|255634524|gb|ACU17625.1|/2.93037e-154/unknown [Glycine max]		Glyma08g03490	2.18	7.15	1.71362	gi|255640758|gb|ACU20663.1|/1.18559e-110/unknown [Glycine max]		Glyma20g26730	47.31	14.47	-1.70908	gi|255632548|gb|ACU16624.1|/4.82156e-40/unknown [Glycine max]		Glyma14g17060	2.29	11.29	2.30163	gi|255631616|gb|ACU16175.1|/3.64195e-75/unknown [Glycine max]		Glyma04g01270	162.21	72.69	-1.15803	gi|255626799|gb|ACU13744.1|/1.23176e-32/unknown [Glycine max]
Glyma02g16000	5.96	21.22	1.83204	gi|255626853|gb|ACU13771.1|/5.09026e-42/unknown [Glycine max]		Glyma08g18080	249.97	92.72	-1.4308	gi|255646523|gb|ACU23739.1|/0/unknown [Glycine max]		Glyma10g24340	2.54	10.8	2.08813	gi|255626265|gb|ACU13477.1|/6.96281e-119/unknown [Glycine max]		Glyma02g38710	50.33	17.07	-1.55996	gi|255646322|gb|ACU23644.1|/5.18417e-164/unknown [Glycine max]		Glyma18g43140	44.03	142.76	1.69703	gi|255641741|gb|ACU21141.1|/2.82527e-144/unknown [Glycine max]		Glyma06g45020	202.69	62.23	-1.70359	gi|255627129|gb|ACU13909.1|/2.90725e-30/unknown [Glycine max]		Glyma17g32570	2.29	11.29	2.30163	gi|255638020|gb|ACU19325.1|/1.4699e-55/unknown [Glycine max]		Glyma20g21250	68.97	30.88	-1.1593	gi|255628071|gb|ACU14380.1|/1.45295e-37/unknown [Glycine max]
Glyma13g24420	17.53	61.98	1.82198	gi|217075142|gb|ACJ85931.1|/2.14849e-96/unknown [Medicago truncatula]		Glyma08g22170	16.65	6.18	-1.42984	gi|255639745|gb|ACU20166.1|/0/unknown [Glycine max]		Glyma19g44710	1.27	5.4	2.08813	gi|255646980|gb|ACU23959.1|/3.06688e-48/unknown [Glycine max]		Glyma20g27020	27.44	9.23	-1.57188	gi|255627517|gb|ACU14103.1|/1.531e-29/unknown [Glycine max]		Glyma17g29660	7.1	23.01	1.69637	gi|255626135|gb|ACU13412.1|/1.06301e-96/unknown [Glycine max]		Glyma14g10310	10.73	3.31	-1.69675	gi|255634636|gb|ACU17680.1|/7.42752e-128/unknown [Glycine max]		Glyma19g30490	6.86	33.7	2.29647	gi|255631374|gb|ACU16054.1|/8.66166e-60/unknown [Glycine max]		Glyma02g44060	14.6	6.53	-1.16081	gi|255639399|gb|ACU19995.1|/1.4221e-158/unknown [Glycine max]
Glyma15g10400	11.39	39.76	1.80355	gi|255646865|gb|ACU23903.1|/3.57174e-152/unknown [Glycine max]		Glyma19g39240	86.42	32.08	-1.42969	gi|255628799|gb|ACU14744.1|/9.57474e-93/unknown [Glycine max]		Glyma06g14170	13.08	55.56	2.08668	gi|15238541|ref|NP_197834.1|/1.18735e-64/unknown protein [Arabidopsis thaliana]		Glyma03g15130	31.07	10.45	-1.57202	gi|255629589|gb|ACU15142.1|/3.33922e-100/unknown [Glycine max]		Glyma06g13130	2.37	7.67	1.69434	gi|255645249|gb|ACU23122.1|/0/unknown [Glycine max]		Glyma13g22940	11.83	3.66	-1.69253	gi|255628113|gb|ACU14401.1|/1.32035e-76/unknown [Glycine max]		Glyma07g28990	9.85	48.35	2.29532	gi|255641027|gb|ACU20793.1|/3.86682e-142/unknown [Glycine max]		Glyma17g37210	31.67	14.12	-1.16538	gi|255634753|gb|ACU17738.1|/1.49379e-115/unknown [Glycine max]
Glyma13g07800	4.03	14.03	1.79966	gi|255637351|gb|ACU19005.1|/8.01818e-145/unknown [Glycine max]		Glyma12g31700	31.9	11.86	-1.42745	gi|255637379|gb|ACU19018.1|/3.86637e-167/unknown [Glycine max]		Glyma02g47850	3.82	16.2	2.08435	gi|255633784|gb|ACU17252.1|/3.82538e-36/unknown [Glycine max]		Glyma10g27980	32.71	10.97	-1.57617	gi|255645771|gb|ACU23378.1|/6.28975e-144/unknown [Glycine max]		Glyma06g02300	4.73	15.17	1.68131	gi|255625977|gb|ACU13333.1|/4.3179e-65/unknown [Glycine max]		Glyma08g42070	18.56	5.75	-1.69056	gi|255642197|gb|ACU21363.1|/0/unknown [Glycine max]		Glyma04g09310	1.23	6	2.2863	gi|255642183|gb|ACU21356.1|/0/unknown [Glycine max]		Glyma01g43420	19	8.47	-1.16557	gi|255639279|gb|ACU19938.1|/3.99236e-129/unknown [Glycine max]
Glyma01g29950	18.06	62.82	1.79843	gi|255635147|gb|ACU17930.1|/2.84489e-109/unknown [Glycine max]		Glyma02g05990	12.1	4.51	-1.42381	gi|255626517|gb|ACU13603.1|/4.59951e-92/unknown [Glycine max]		Glyma06g20980	1.45	6.1	2.07276	gi|255635660|gb|ACU18179.1|/6.78911e-158/unknown [Glycine max]		Glyma02g01210	40.52	13.58	-1.57715	gi|255637121|gb|ACU18892.1|/0/unknown [Glycine max]		Glyma02g02740	10.37	33.12	1.67529	gi|255636393|gb|ACU18535.1|/7.45178e-116/unknown [Glycine max]		Glyma01g41400	7.28	2.27	-1.68125	gi|255629017|gb|ACU14853.1|/7.75618e-103/unknown [Glycine max]		Glyma08g17480	2.46	12	2.2863	gi|255646953|gb|ACU23946.1|/3.02461e-103/unknown [Glycine max]		Glyma17g07900	618.77	275.78	-1.16589	gi|255628681|gb|ACU14685.1|/1.14788e-49/unknown [Glycine max]
Glyma09g31220	8.76	30.41	1.79554	gi|255633514|gb|ACU17115.1|/4.35852e-124/unknown [Glycine max]		Glyma05g23150	26.29	9.86	-1.41485	gi|255646058|gb|ACU23516.1|/4.53699e-125/unknown [Glycine max]		Glyma12g29090	57.06	239.3	2.06827	gi|255630151|gb|ACU15429.1|/5.44426e-41/unknown [Glycine max]		Glyma08g05810	31.44	10.45	-1.5891	gi|255630829|gb|ACU15777.1|/3.23557e-76/unknown [Glycine max]		Glyma12g37020	6.19	19.52	1.65694	gi|255635720|gb|ACU18209.1|/0/unknown [Glycine max]		Glyma12g06100	8.37	2.61	-1.68118	gi|255647222|gb|ACU24079.1|/7.14485e-11/unknown [Glycine max]		Glyma01g26220	6.33	30.7	2.27796	gi|255632224|gb|ACU16470.1|/4.1164e-117/unknown [Glycine max]		Glyma06g01780	36.07	16.06	-1.16733	gi|255633566|gb|ACU17142.1|/2.48537e-93/unknown [Glycine max]
Glyma02g07940	26.29	90.89	1.78961	gi|255639495|gb|ACU20042.1|/0/unknown [Glycine max]		Glyma18g09430	22.61	8.52	-1.40804	gi|255632091|gb|ACU16398.1|/2.05977e-88/unknown [Glycine max]		Glyma11g12480	3.82	16.02	2.06823	gi|255625591|gb|ACU13140.1|/2.73849e-43/unknown [Glycine max]		Glyma07g04630	136.29	45.28	-1.58973	gi|255638786|gb|ACU19697.1|/1.27801e-128/unknown [Glycine max]		Glyma03g25280	9.46	29.81	1.65588	gi|255641483|gb|ACU21017.1|/6.64307e-66/unknown [Glycine max]		Glyma03g39200	39.66	12.38	-1.67967	gi|255640851|gb|ACU20708.1|/2.50314e-70/unknown [Glycine max]		Glyma11g21670	3.52	16.94	2.26679	gi|255641242|gb|ACU20898.1|/0/unknown [Glycine max]		Glyma14g03380	31.32	13.94	-1.16785	gi|255631354|gb|ACU16044.1|/5.08014e-97/unknown [Glycine max]
Glyma03g35170	93.78	324.11	1.78913	gi|255642155|gb|ACU21342.1|/1.02518e-151/unknown [Glycine max]		Glyma11g37820	26.47	10.02	-1.40148	gi|255634863|gb|ACU17790.1|/0/unknown [Glycine max]		Glyma03g07750	3.63	15.15	2.06128	gi|255639560|gb|ACU20074.1|/4.53205e-117/unknown [Glycine max]		Glyma08g16210	44.88	14.8	-1.60048	gi|255638690|gb|ACU19650.1|/4.82868e-129/unknown [Glycine max]		Glyma06g45860	4.37	13.77	1.65582	gi|255634919|gb|ACU17818.1|/1.2237e-180/unknown [Glycine max]		Glyma03g31010	8.92	2.79	-1.67678	gi|255648193|gb|ACU24550.1|/8.8117e-139/unknown [Glycine max]		Glyma11g07510	2.64	12.7	2.26622	gi|255638858|gb|ACU19732.1|/3.49812e-170/unknown [Glycine max]		Glyma08g46840	12.32	5.47	-1.17139	gi|255627277|gb|ACU13983.1|/7.75494e-69/unknown [Glycine max]
Glyma16g26550	11.57	39.76	1.78093	gi|255645549|gb|ACU23269.1|/0/unknown [Glycine max]		Glyma17g24120	21.56	8.19	-1.39642	gi|255641533|gb|ACU21040.1|/4.32612e-163/unknown [Glycine max]		Glyma06g42070	267.3	1114.8	2.06025	gi|255627009|gb|ACU13849.1|/2.32298e-46/unknown [Glycine max]		Glyma07g11300	7.45	2.44	-1.61036	gi|255635305|gb|ACU18006.1|/6.12021e-143/unknown [Glycine max]		Glyma12g03280	2.55	8.02	1.6531	gi|255628319|gb|ACU14504.1|/1.89657e-88/unknown [Glycine max]		Glyma11g02000	9.46	2.96	-1.67624	gi|255630706|gb|ACU15714.1|/2.41026e-33/unknown [Glycine max]		Glyma09g20290	2.29	10.94	2.25619	gi|255627447|gb|ACU14068.1|/2.39304e-98/unknown [Glycine max]		Glyma18g52310	18.3	8.12	-1.17229	gi|255633118|gb|ACU16914.1|/3.6691e-63/unknown [Glycine max]
Glyma02g08700	2.63	9.02	1.77806	gi|255647757|gb|ACU24339.1|/1.50895e-165/unknown [Glycine max]		Glyma05g14800	10.52	4.01	-1.39146	gi|255628239|gb|ACU14464.1|/5.15239e-73/unknown [Glycine max]		Glyma15g10440	2.18	8.88	2.02623	gi|217074242|gb|ACJ85481.1|/5.93057e-178/unknown [Medicago truncatula]		Glyma11g02140	17.63	5.75	-1.6164	gi|255627593|gb|ACU14141.1|/9.8367e-60/unknown [Glycine max]		Glyma13g35480	9.46	29.63	1.64715	gi|255646509|gb|ACU23732.1|/4.42812e-139/unknown [Glycine max]		Glyma03g32610	9.46	2.96	-1.67624	gi|255630534|gb|ACU15625.1|/9.15671e-50/unknown [Glycine max]		Glyma05g32530	7.74	36.88	2.25243	gi|255629414|gb|ACU15053.1|/1.59699e-104/unknown [Glycine max]		Glyma13g40900	60.87	27	-1.17277	gi|255626369|gb|ACU13529.1|/1.01832e-43/unknown [Glycine max]
Glyma14g35940	12.8	43.77	1.7738	gi|217071340|gb|ACJ84030.1|/6.22454e-82/unknown [Medicago truncatula]		Glyma11g03900	76.25	29.07	-1.39121	gi|255639847|gb|ACU20216.1|/1.97124e-119/unknown [Glycine max]		Glyma04g01260	1.82	7.31	2.00593	gi|255640306|gb|ACU20442.1|/3.36342e-38/unknown [Glycine max]		Glyma11g00700	9.09	2.96	-1.61868	gi|255627039|gb|ACU13864.1|/9.47774e-76/unknown [Glycine max]		Glyma08g13360	12.92	40.09	1.63364	gi|255627019|gb|ACU13854.1|/7.95904e-77/unknown [Glycine max]		Glyma19g42780	10.01	3.14	-1.67261	gi|255646844|gb|ACU23893.1|/0/unknown [Glycine max]		Glyma04g38130	4.57	21.7	2.24743	gi|255633132|gb|ACU16921.1|/2.84979e-33/unknown [Glycine max]		Glyma06g17490	16.71	7.41	-1.17317	gi|255629105|gb|ACU14897.1|/2.21547e-34/unknown [Glycine max]
Glyma10g29180	2.45	8.35	1.76899	gi|255634799|gb|ACU17760.1|/3.56899e-149/unknown [Glycine max]		Glyma12g00860	9.64	3.68	-1.38933	gi|255647895|gb|ACU24406.1|/1.22429e-130/unknown [Glycine max]		Glyma07g30070	20.35	81.33	1.99876	gi|255640930|gb|ACU20746.1|/1.7943e-97/unknown [Glycine max]		Glyma03g29870	11.27	3.66	-1.62257	gi|255628857|gb|ACU14773.1|/1.54709e-117/unknown [Glycine max]		Glyma13g36610	5.46	16.91	1.6309	gi|255647592|gb|ACU24259.1|/1.08452e-116/unknown [Glycine max]		Glyma07g17820	10.55	3.31	-1.67234	gi|255632870|gb|ACU16788.1|/6.77137e-66/unknown [Glycine max]		Glyma19g30110	8.97	42.52	2.24496	gi|255639861|gb|ACU20223.1|/3.44985e-124/unknown [Glycine max]		Glyma08g15260	27.45	12.17	-1.17348	gi|255626793|gb|ACU13741.1|/3.4439e-53/unknown [Glycine max]
Glyma02g17370	13.15	44.77	1.76747	gi|255640785|gb|ACU20676.1|/2.09919e-43/unknown [Glycine max]		Glyma02g09850	24.02	9.19	-1.3861	gi|255631688|gb|ACU16211.1|/1.47689e-50/unknown [Glycine max]		Glyma12g35350	5.45	21.6	1.9867	gi|255642537|gb|ACU21532.1|/2.16526e-178/unknown [Glycine max]		Glyma13g31230	15.08	4.88	-1.62768	gi|255639800|gb|ACU20193.1|/1.86446e-175/unknown [Glycine max]		Glyma19g25330	4.73	14.64	1.63	gi|255638205|gb|ACU19416.1|/3.19144e-125/unknown [Glycine max]		Glyma04g38170	11.64	3.66	-1.66918	gi|255648331|gb|ACU24617.1|/0/unknown [Glycine max]		Glyma06g00800	1.94	9.17	2.24087	gi|255641117|gb|ACU20837.1|/6.29525e-111/unknown [Glycine max]		Glyma02g44470	11.96	5.29	-1.17688	gi|255638993|gb|ACU19797.1|/9.56934e-113/unknown [Glycine max]
Glyma20g24580	12.27	41.6	1.76145	gi|255627011|gb|ACU13850.1|/1.08249e-45/unknown [Glycine max]		Glyma02g16090	105.35	40.6	-1.37564	gi|255636002|gb|ACU18346.1|/4.32338e-114/unknown [Glycine max]		Glyma05g32170	4.36	17.24	1.98336	gi|255640318|gb|ACU20447.1|/6.30999e-103/unknown [Glycine max]		Glyma08g45030	7.63	2.44	-1.6448	gi|255638811|gb|ACU19709.1|/1.44911e-112/unknown [Glycine max]		Glyma12g05080	6.37	19.7	1.62883	gi|255631376|gb|ACU16055.1|/1.99774e-61/unknown [Glycine max]		Glyma16g31280	12.74	4.01	-1.66769	gi|255644961|gb|ACU22980.1|/1.54934e-92/unknown [Glycine max]		Glyma17g14920	10.73	50.64	2.23863	gi|255629766|gb|ACU15232.1|/1.89607e-18/unknown [Glycine max]		Glyma09g13840	26.74	11.82	-1.17777	gi|255628233|gb|ACU14461.1|/2.48961e-110/unknown [Glycine max]
Glyma16g34330	1.93	6.52	1.75627	gi|255625921|gb|ACU13305.1|/4.36727e-75/unknown [Glycine max]		Glyma19g37000	2905.91	1121.53	-1.37352	gi|255632510|gb|ACU16605.1|/2.53619e-121/unknown [Glycine max]		Glyma06g04980	43.25	170.85	1.98196	gi|255627981|gb|ACU14335.1|/2.97028e-116/unknown [Glycine max]		Glyma15g12780	19.63	6.27	-1.64652	gi|255642257|gb|ACU21393.1|/0/unknown [Glycine max]		Glyma07g38750	5.09	15.69	1.62411	gi|255641847|gb|ACU21192.1|/0/unknown [Glycine max]		Glyma13g43250	39.85	12.55	-1.66689	gi|255637914|gb|ACU19274.1|/1.12871e-115/unknown [Glycine max]		Glyma08g30350	1.76	8.29	2.2358	gi|255317084|gb|ACU01861.1|/6.88731e-157/unknown protein [Glycine max]		Glyma11g13290	29.56	13.06	-1.17849	gi|255630627|gb|ACU15673.1|/1.54063e-31/unknown [Glycine max]
Glyma07g09840	2.28	7.69	1.75395	gi|255646163|gb|ACU23567.1|/6.27449e-155/unknown [Glycine max]		Glyma05g37420	98.69	38.26	-1.36707	gi|255633316|gb|ACU17015.1|/3.3533e-43/unknown [Glycine max]		Glyma18g16710	2.91	11.49	1.98129	gi|255632659|gb|ACU16681.1|/2.12869e-61/unknown [Glycine max]		Glyma16g01220	8.18	2.61	-1.64805	gi|255648117|gb|ACU24513.1|/5.29874e-118/unknown [Glycine max]		Glyma05g25810	78.24	240.9	1.62246	gi|255646685|gb|ACU23816.1|/2.77303e-144/unknown [Glycine max]		Glyma11g35870	15.47	4.88	-1.66452	gi|255630087|gb|ACU15397.1|/3.03819e-52/unknown [Glycine max]		Glyma13g42200	1.76	8.29	2.2358	gi|255631286|gb|ACU16010.1|/3.99942e-78/unknown [Glycine max]		Glyma16g25460	14.78	6.53	-1.17849	gi|255637795|gb|ACU19219.1|/2.31115e-164/unknown [Glycine max]
Glyma02g07510	7.54	25.39	1.75162	gi|255645549|gb|ACU23269.1|/0/unknown [Glycine max]		Glyma02g45430	40.67	15.87	-1.35766	gi|255631354|gb|ACU16044.1|/3.54915e-100/unknown [Glycine max]		Glyma08g26830	1.82	7.14	1.97199	gi|255647691|gb|ACU24307.1|/1.60393e-144/unknown [Glycine max]		Glyma20g25950	47.79	14.98	-1.67367	gi|255647854|gb|ACU24386.1|/4.0419e-22/unknown [Glycine max]		Glyma20g36400	2.55	7.84	1.62036	gi|255638414|gb|ACU19517.1|/1.14698e-160/unknown [Glycine max]		Glyma10g40580	14.92	4.71	-1.66345	gi|255632548|gb|ACU16624.1|/1.65715e-40/unknown [Glycine max]		Glyma11g14820	16.71	78.69	2.23547	gi|255640802|gb|ACU20684.1|/0/unknown [Glycine max]		Glyma15g23580	20.76	9.17	-1.17881	gi|255639701|gb|ACU20144.1|/9.5674e-152/unknown [Glycine max]
Glyma13g25580	2.63	8.85	1.75061	gi|255626717|gb|ACU13703.1|/3.78534e-110/unknown [Glycine max]		Glyma03g32970	50.49	19.71	-1.35707	gi|255635165|gb|ACU17939.1|/7.88414e-119/unknown [Glycine max]		Glyma06g07340	2	7.84	1.97085	gi|255629430|gb|ACU15061.1|/2.83163e-108/unknown [Glycine max]		Glyma08g12030	143.74	44.93	-1.67771	gi|255633192|gb|ACU16952.1|/1.55393e-54/unknown [Glycine max]		Glyma18g18230	3.64	11.16	1.61633	gi|255631398|gb|ACU16066.1|/9.50657e-42/unknown [Glycine max]		Glyma10g42530	16.38	5.23	-1.64705	gi|255627839|gb|ACU14264.1|/9.22635e-53/unknown [Glycine max]		Glyma07g16020	69.14	324.83	2.23209	gi|255640503|gb|ACU20537.1|/1.06457e-171/unknown [Glycine max]		Glyma05g30070	23.58	10.41	-1.17959	gi|255648032|gb|ACU24472.1|/0/unknown [Glycine max]
Glyma06g42890	30.85	103.58	1.7474	gi|255627241|gb|ACU13965.1|/7.20487e-73/unknown [Glycine max]		Glyma04g08410	82.57	32.24	-1.35677	gi|255638370|gb|ACU19496.1|/2.31709e-157/unknown [Glycine max]		Glyma09g07560	11.99	46.68	1.96097	gi|255647293|gb|ACU24113.1|/1.44173e-73/unknown [Glycine max]		Glyma10g40550	45.79	14.28	-1.68104	gi|217071736|gb|ACJ84228.1|/0/unknown [Medicago truncatula]		Glyma12g34310	6	18.3	1.60881	gi|255647979|gb|ACU24446.1|/4.76057e-60/unknown [Glycine max]		Glyma19g31310	8.73	2.79	-1.64572	gi|255647755|gb|ACU24338.1|/1.37788e-40/unknown [Glycine max]		Glyma08g16190	11.44	53.64	2.22922	gi|255647793|gb|ACU24357.1|/1.87527e-72/unknown [Glycine max]		Glyma15g08680	289.77	127.57	-1.18362	gi|255637781|gb|ACU19212.1|/0/unknown [Glycine max]
Glyma12g36750	15.43	51.79	1.74694	gi|255647793|gb|ACU24357.1|/2.19926e-129/unknown [Glycine max]		Glyma09g01680	187.39	73.18	-1.35652	gi|255647364|gb|ACU24148.1|/2.12112e-69/unknown [Glycine max]		Glyma14g02120	6.36	24.73	1.95916	gi|255638594|gb|ACU19604.1|/1.747e-108/unknown [Glycine max]		Glyma09g41100	31.44	9.75	-1.68913	gi|255635003|gb|ACU17860.1|/6.16734e-153/unknown [Glycine max]		Glyma11g20250	3.09	9.41	1.60659	gi|255629061|gb|ACU14875.1|/1.47401e-06/unknown [Glycine max]		Glyma14g15360	30.38	9.76	-1.63817	gi|255631718|gb|ACU16226.1|/5.93625e-45/unknown [Glycine max]		Glyma13g44300	10.03	46.76	2.22095	gi|255635864|gb|ACU18279.1|/3.03162e-136/unknown [Glycine max]		Glyma18g38350	28.85	12.7	-1.18374	gi|255639737|gb|ACU20162.1|/6.87187e-121/unknown [Glycine max]
Glyma09g09220	4.21	14.03	1.73662	gi|255647687|gb|ACU24305.1|/0/unknown [Glycine max]		Glyma06g17160	12.8	5.01	-1.35326	gi|255644714|gb|ACU22859.1|/2.82732e-149/unknown [Glycine max]		Glyma12g15560	9.99	38.84	1.95899	gi|255635510|gb|ACU18106.1|/1.17151e-134/unknown [Glycine max]		Glyma09g26610	17.44	5.4	-1.69137	gi|255639055|gb|ACU19828.1|/1.26487e-149/unknown [Glycine max]		Glyma08g24750	3.09	9.41	1.60659	gi|255630026|gb|ACU15365.1|/2.07827e-88/unknown [Glycine max]		Glyma20g32000	789.28	254.15	-1.63486	gi|255648055|gb|ACU24483.1|/4.02231e-161/unknown [Glycine max]		Glyma07g38810	1.06	4.94	2.22045	gi|217074248|gb|ACJ85484.1|/0/unknown [Medicago truncatula]		Glyma04g03310	60.17	26.47	-1.18469	gi|255646048|gb|ACU23511.1|/9.21723e-125/unknown [Glycine max]
Glyma14g06820	40.84	135.83	1.73375	gi|255626245|gb|ACU13467.1|/2.55963e-60/unknown [Glycine max]		Glyma10g01500	11.92	4.68	-1.3488	gi|255647669|gb|ACU24296.1|/0/unknown [Glycine max]		Glyma08g11070	28.53	110.77	1.95702	gi|255640724|gb|ACU20646.1|/1.44449e-66/unknown [Glycine max]		Glyma13g01570	184.62	57.12	-1.69249	gi|255647987|gb|ACU24450.1|/0/unknown [Glycine max]		Glyma11g22060	4.18	12.72	1.60552	gi|255641164|gb|ACU20859.1|/0/unknown [Glycine max]		Glyma02g07950	81.51	26.32	-1.63082	gi|255640542|gb|ACU20556.1|/1.17726e-30/unknown [Glycine max]		Glyma04g32680	1.94	9	2.21387	gi|255645835|gb|ACU23408.1|/3.37103e-91/unknown [Glycine max]		Glyma02g44600	14.07	6.18	-1.18694	gi|255633182|gb|ACU16947.1|/4.53414e-55/unknown [Glycine max]
Glyma17g10050	26.82	89.05	1.73131	gi|255628227|gb|ACU14458.1|/6.00522e-49/unknown [Glycine max]		Glyma20g27280	46.8	18.38	-1.34837	gi|255638545|gb|ACU19580.1|/0/unknown [Glycine max]		Glyma15g12960	4.18	16.2	1.95442	gi|255626127|gb|ACU13408.1|/7.26316e-79/unknown [Glycine max]		Glyma17g10170	17.08	5.22	-1.71019	gi|255632528|gb|ACU16614.1|/3.27951e-90/unknown [Glycine max]		Glyma11g06510	4.37	13.25	1.60029	gi|255638262|gb|ACU19444.1|/1.1942e-175/unknown [Glycine max]		Glyma02g11890	65.86	21.27	-1.63058	gi|217074996|gb|ACJ85858.1|/0/unknown [Medicago truncatula]		Glyma01g04360	6.86	31.76	2.21093	gi|255647293|gb|ACU24113.1|/0/unknown [Glycine max]		Glyma16g02310	14.07	6.18	-1.18694	gi|255645997|gb|ACU23486.1|/5.05571e-63/unknown [Glycine max]
Glyma01g35840	6.14	20.38	1.73084	gi|217070094|gb|ACJ83407.1|/3.21098e-13/unknown [Medicago truncatula]		Glyma20g34820	1577.16	624.34	-1.33693	gi|255631802|gb|ACU16268.1|/4.34879e-34/unknown [Glycine max]		Glyma06g11850	3.82	14.8	1.95395	gi|255644617|gb|ACU22811.1|/0/unknown [Glycine max]		Glyma07g09600	342.35	103.28	-1.72891	gi|255633846|gb|ACU17284.1|/2.08877e-49/unknown [Glycine max]		Glyma08g13790	10.19	30.85	1.59812	gi|255628451|gb|ACU14570.1|/3.35723e-55/unknown [Glycine max]		Glyma09g04510	72.6	23.53	-1.62547	gi|255630540|gb|ACU15628.1|/1.06737e-84/unknown [Glycine max]		Glyma12g07000	3.17	14.64	2.20736	gi|255645052|gb|ACU23025.1|/0/unknown [Glycine max]		Glyma20g39020	14.07	6.18	-1.18694	gi|255636089|gb|ACU18389.1|/0/unknown [Glycine max]
Glyma04g05460	3.68	12.2	1.7291	gi|255638904|gb|ACU19754.1|/1.30097e-73/unknown [Glycine max]		Glyma01g37010	12.62	5.01	-1.33283	gi|255638114|gb|ACU19371.1|/2.34405e-65/unknown [Glycine max]		Glyma06g13640	20.53	78.89	1.94211	gi|255647148|gb|ACU24042.1|/1.41314e-133/unknown [Glycine max]		Glyma13g43250	67.6	20.38	-1.72987	gi|255637914|gb|ACU19274.1|/1.12871e-115/unknown [Glycine max]		Glyma07g07170	14.19	42.88	1.59543	gi|255627043|gb|ACU13866.1|/8.39975e-32/unknown [Glycine max]		Glyma08g25520	35.48	11.5	-1.62537	gi|255627743|gb|ACU14216.1|/6.41811e-117/unknown [Glycine max]		Glyma15g15140	28.33	130.74	2.2063	gi|255626981|gb|ACU13835.1|/1.14912e-40/unknown [Glycine max]		Glyma13g34920	110.49	48.52	-1.18726	gi|255630732|gb|ACU15727.1|/2.16766e-60/unknown [Glycine max]
Glyma07g36970	2.98	9.86	1.72628	gi|255628477|gb|ACU14583.1|/6.19554e-45/unknown [Glycine max]		Glyma08g23800	10.52	4.18	-1.33156	gi|255639606|gb|ACU20097.1|/6.59271e-172/unknown [Glycine max]		Glyma06g23380	2	7.66	1.93734	gi|255633015|gb|ACU16862.1|/6.14936e-25/unknown [Glycine max]		Glyma13g40940	127.38	37.44	-1.76649	gi|255626369|gb|ACU13529.1|/1.83257e-43/unknown [Glycine max]		Glyma12g32190	16.56	49.85	1.58989	gi|217074268|gb|ACJ85494.1|/2.2117e-102/unknown [Medicago truncatula]		Glyma11g21020	34.93	11.33	-1.62432	gi|255626867|gb|ACU13778.1|/2.67894e-105/unknown [Glycine max]		Glyma15g18600	6.33	29.11	2.20124	gi|255646072|gb|ACU23523.1|/3.50118e-141/unknown [Glycine max]		Glyma10g40370	16.89	7.41	-1.18862	gi|255634620|gb|ACU17672.1|/0/unknown [Glycine max]
Glyma01g22750	32.61	107.76	1.72444	gi|255646159|gb|ACU23565.1|/2.56363e-26/unknown [Glycine max]		Glyma18g01730	26.82	10.69	-1.32705	gi|255628887|gb|ACU14788.1|/2.38042e-99/unknown [Glycine max]		Glyma02g45700	1.64	6.27	1.93477	gi|255639007|gb|ACU19804.1|/2.45987e-140/unknown [Glycine max]		Glyma12g13920	132.29	38.66	-1.77479	gi|255629357|gb|ACU15023.1|/4.37441e-93/unknown [Glycine max]		Glyma13g34430	2.55	7.67	1.58873	gi|255642391|gb|ACU21459.1|/1.92264e-163/unknown [Glycine max]		Glyma05g33380	11.28	3.66	-1.62385	gi|255631276|gb|ACU16005.1|/4.35393e-129/unknown [Glycine max]		Glyma15g14000	3.34	15.35	2.20032	gi|255647897|gb|ACU24407.1|/7.16283e-137/unknown [Glycine max]		Glyma07g38820	88.32	38.64	-1.19265	gi|255639628|gb|ACU20108.1|/0/unknown [Glycine max]
Glyma06g04980	12.97	42.77	1.72142	gi|255627981|gb|ACU14335.1|/2.97028e-116/unknown [Glycine max]		Glyma06g13710	13.32	5.35	-1.31598	gi|255630583|gb|ACU15651.1|/9.28005e-66/unknown [Glycine max]		Glyma07g32120	8	30.48	1.92979	gi|217075142|gb|ACJ85931.1|/2.81429e-106/unknown [Medicago truncatula]		Glyma04g38560	158.64	45.28	-1.80881	gi|255640977|gb|ACU20768.1|/4.72642e-159/unknown [Glycine max]		Glyma19g44720	4	12.03	1.58856	gi|255630986|gb|ACU15857.1|/5.73877e-106/unknown [Glycine max]		Glyma05g04500	32.2	10.46	-1.62218	gi|255625839|gb|ACU13264.1|/1.38807e-39/unknown [Glycine max]		Glyma17g06610	2.29	10.41	2.18455	gi|255634465|gb|ACU17597.1|/6.64614e-74/unknown [Glycine max]		Glyma06g24500	51.37	22.41	-1.19678	gi|255629416|gb|ACU15054.1|/5.58843e-61/unknown [Glycine max]
Glyma16g01870	5.08	16.71	1.71781	gi|255645717|gb|ACU23352.1|/7.30568e-150/unknown [Glycine max]		Glyma01g00720	14.55	5.85	-1.31451	gi|255546211|ref|XP_002514165.1|/6.73845e-76/protein with unknown function [Ricinus communis]		Glyma03g30280	3.82	14.46	1.92042	gi|255625699|gb|ACU13194.1|/2.28776e-104/unknown [Glycine max]		Glyma10g03240	11.63	3.31	-1.81295	gi|255638439|gb|ACU19529.1|/2.33516e-99/unknown [Glycine max]		Glyma17g02240	4	12.03	1.58856	gi|217074424|gb|ACJ85572.1|/0/unknown [Medicago truncatula]		Glyma17g33110	8.01	2.61	-1.61775	gi|217074420|gb|ACJ85570.1|/2.36958e-76/unknown [Medicago truncatula]		Glyma01g41030	3.87	17.47	2.17447	gi|255635054|gb|ACU17885.1|/6.18011e-127/unknown [Glycine max]		Glyma03g41310	16.19	7.06	-1.19736	gi|255646494|gb|ACU23725.1|/1.68944e-170/unknown [Glycine max]
Glyma19g43450	45.93	149.53	1.70293	gi|255638621|gb|ACU19616.1|/1.23401e-111/unknown [Glycine max]		Glyma02g03950	17	6.85	-1.31136	gi|255628775|gb|ACU14732.1|/5.56543e-28/unknown [Glycine max]		Glyma16g23920	3.82	14.46	1.92042	gi|255637533|gb|ACU19093.1|/0/unknown [Glycine max]		Glyma17g13540	12.54	3.48	-1.84938	gi|255645725|gb|ACU23356.1|/0/unknown [Glycine max]		Glyma08g09540	4.18	12.55	1.58611	gi|217075895|gb|ACJ86307.1|/0/unknown [Medicago truncatula]		Glyma18g06050	8.01	2.61	-1.61775	gi|255627205|gb|ACU13947.1|/3.50229e-77/unknown [Glycine max]		Glyma19g34940	4.93	22.23	2.17285	gi|255628255|gb|ACU14472.1|/4.08192e-98/unknown [Glycine max]		Glyma03g40260	20.23	8.82	-1.19765	gi|255635758|gb|ACU18228.1|/3.78176e-152/unknown [Glycine max]
Glyma12g34660	20.69	67.16	1.69867	gi|255640877|gb|ACU20721.1|/9.27455e-34/unknown [Glycine max]		Glyma09g06690	13.67	5.51	-1.31089	gi|255641087|gb|ACU20822.1|/1.68982e-115/unknown [Glycine max]		Glyma11g36900	5.27	19.85	1.91326	gi|255631252|gb|ACU15993.1|/1.77112e-56/unknown [Glycine max]		Glyma04g00450	117.02	32.39	-1.85313	gi|255627561|gb|ACU14125.1|/6.64054e-149/unknown [Glycine max]		Glyma14g39280	15.1	45.15	1.58018	gi|255635712|gb|ACU18205.1|/3.50769e-134/unknown [Glycine max]		Glyma11g12670	43.3	14.12	-1.61663	gi|255647731|gb|ACU24326.1|/1.83933e-166/unknown [Glycine max]		Glyma19g02370	9.32	41.99	2.17164	gi|217074028|gb|ACJ85374.1|/7.0071e-134/unknown [Medicago truncatula]		Glyma06g03150	194.06	84.52	-1.19914	gi|255627353|gb|ACU14021.1|/1.3042e-65/unknown [Glycine max]
Glyma06g19400	3.51	11.36	1.69442	gi|255644872|gb|ACU22936.1|/5.24776e-140/unknown [Glycine max]		Glyma20g36810	69.59	28.07	-1.30985	gi|255630216|gb|ACU15463.1|/1.045e-85/unknown [Glycine max]		Glyma09g04520	26.53	99.79	1.91127	gi|255631494|gb|ACU16114.1|/2.23111e-83/unknown [Glycine max]		Glyma04g06410	10.72	2.96	-1.85664	gi|255625883|gb|ACU13286.1|/9.79879e-79/unknown [Glycine max]		Glyma18g12280	11.64	34.51	1.56792	gi|255646513|gb|ACU23734.1|/4.79825e-143/unknown [Glycine max]		Glyma10g04550	22.38	7.32	-1.61229	gi|255626935|gb|ACU13812.1|/1.01389e-51/unknown [Glycine max]		Glyma01g37090	23.75	106.75	2.16824	gi|255633852|gb|ACU17287.1|/4.679e-76/unknown [Glycine max]		Glyma05g23220	157.64	68.64	-1.19951	gi|255631866|gb|ACU16300.1|/6.70561e-57/unknown [Glycine max]
Glyma01g28760	10.87	35.08	1.6903	gi|255632324|gb|ACU16520.1|/3.93846e-109/unknown [Glycine max]		Glyma05g04400	11.57	4.68	-1.30581	gi|255632101|gb|ACU16403.1|/1.68529e-40/unknown [Glycine max]		Glyma03g28460	10.36	38.84	1.90652	gi|255633342|gb|ACU17028.1|/2.77789e-138/unknown [Glycine max]		Glyma13g40890	217.51	59.04	-1.88132	gi|255647574|gb|ACU24250.1|/1.97387e-43/unknown [Glycine max]		Glyma10g09750	44.03	130.21	1.56428	gi|255640630|gb|ACU20600.1|/2.6798e-44/unknown [Glycine max]		Glyma13g26600	41.48	13.6	-1.60881	gi|255638149|gb|ACU19388.1|/0/unknown [Glycine max]		Glyma07g37410	1.06	4.76	2.1669	gi|255632294|gb|ACU16505.1|/1.19619e-46/unknown [Glycine max]		Glyma19g29990	13.37	5.82	-1.19991	gi|255647841|gb|ACU24380.1|/1.3463e-158/unknown [Glycine max]
Glyma02g36350	2.45	7.85	1.67991	gi|217074404|gb|ACJ85562.1|/0/unknown [Medicago truncatula]		Glyma17g12610	32.61	13.2	-1.30478	gi|255629269|gb|ACU14979.1|/3.78591e-38/unknown [Glycine max]		Glyma17g03340	72.69	271.17	1.89937	gi|255628305|gb|ACU14497.1|/1.32296e-84/unknown [Glycine max]		Glyma07g39500	8.36	2.26	-1.88718	gi|255639818|gb|ACU20202.1|/9.34165e-141/unknown [Glycine max]		Glyma16g06310	24.38	71.99	1.5621	gi|255635009|gb|ACU17863.1|/2.7349e-133/unknown [Glycine max]		Glyma16g25210	16.38	5.4	-1.6009	gi|255646239|gb|ACU23604.1|/0/unknown [Glycine max]		Glyma18g43290	4.05	18.17	2.16556	gi|255627261|gb|ACU13975.1|/7.44933e-31/unknown [Glycine max]		Glyma07g08650	11.79	5.12	-1.20335	gi|217071738|gb|ACJ84229.1|/2.87949e-165/unknown [Medicago truncatula]
Glyma09g41240	14.55	46.61	1.67962	gi|217074000|gb|ACJ85360.1|/1.16533e-134/unknown [Medicago truncatula]		Glyma16g04950	76.25	30.91	-1.30266	gi|255647007|gb|ACU23972.1|/1.35868e-151/unknown [Glycine max]		Glyma06g06820	1.64	6.1	1.89511	gi|255628169|gb|ACU14429.1|/5.10797e-42/unknown [Glycine max]		Glyma15g09530	61.42	16.55	-1.89188	gi|255636449|gb|ACU18563.1|/0/unknown [Glycine max]		Glyma04g35970	4.37	12.9	1.56167	gi|255635613|gb|ACU18156.1|/4.17071e-174/unknown [Glycine max]		Glyma09g03500	126.63	41.84	-1.59766	gi|255641517|gb|ACU21032.1|/2.48593e-163/unknown [Glycine max]		Glyma04g05120	1.94	8.65	2.15664	gi|255634498|gb|ACU17613.1|/1.57351e-108/unknown [Glycine max]		Glyma06g14350	17.07	7.41	-1.20392	gi|255645127|gb|ACU23062.1|/9.35456e-105/unknown [Glycine max]
Glyma14g00590	10.87	34.75	1.67666	gi|255635323|gb|ACU18015.1|/3.5722e-134/unknown [Glycine max]		Glyma01g06270	10.69	4.34	-1.30049	gi|255629147|gb|ACU14918.1|/5.05768e-97/unknown [Glycine max]		Glyma03g03310	3.82	14.11	1.88507	gi|255637117|gb|ACU18890.1|/0/unknown [Glycine max]		Glyma11g20030	101.94	27.34	-1.89864	gi|255640392|gb|ACU20483.1|/1.67974e-65/unknown [Glycine max]		Glyma06g36640	7.46	21.96	1.55763	gi|255632958|gb|ACU16833.1|/3.2677e-65/unknown [Glycine max]		Glyma20g00210	8.92	2.96	-1.59145	gi|255639857|gb|ACU20221.1|/4.71591e-148/unknown [Glycine max]		Glyma09g11460	136.88	609.78	2.15538	gi|255631458|gb|ACU16096.1|/3.8966e-60/unknown [Glycine max]		Glyma01g21500	78.12	33.88	-1.20526	gi|255630508|gb|ACU15612.1|/6.08039e-87/unknown [Glycine max]
Glyma18g52980	5.96	19.05	1.67641	gi|255646496|gb|ACU23726.1|/7.46764e-95/unknown [Glycine max]		Glyma03g41040	22.61	9.19	-1.29882	gi|255640213|gb|ACU20397.1|/9.43989e-167/unknown [Glycine max]		Glyma02g40310	3.45	12.71	1.8813	gi|255648391|gb|ACU24646.1|/5.74622e-143/unknown [Glycine max]		Glyma08g22470	7.81	2.09	-1.90182	gi|255632562|gb|ACU16631.1|/8.8029e-75/unknown [Glycine max]		Glyma12g07110	22.56	66.24	1.55394	gi|255642370|gb|ACU21449.1|/2.88161e-79/unknown [Glycine max]		Glyma03g03310	27.29	9.06	-1.59079	gi|255637117|gb|ACU18890.1|/0/unknown [Glycine max]		Glyma07g06800	3.34	14.82	2.14963	gi|255646891|gb|ACU23915.1|/5.31002e-133/unknown [Glycine max]		Glyma04g41600	19.53	8.47	-1.20526	gi|255635898|gb|ACU18296.1|/0/unknown [Glycine max]
Glyma09g03750	9.99	31.91	1.67545	gi|217074110|gb|ACJ85415.1|/0/unknown [Medicago truncatula]		Glyma10g13700	39.44	16.04	-1.29799	gi|255632175|gb|ACU16447.1|/2.21314e-68/unknown [Glycine max]		Glyma17g35070	8.18	30.13	1.88103	gi|255640519|gb|ACU20545.1|/2.55092e-102/unknown [Glycine max]		Glyma09g40690	19.63	5.22	-1.91094	gi|217074426|gb|ACJ85573.1|/0/unknown [Medicago truncatula]		Glyma01g38750	2.91	8.54	1.55322	gi|255645939|gb|ACU23458.1|/6.71054e-175/unknown [Glycine max]		Glyma11g34000	32.39	10.81	-1.58318	gi|255631258|gb|ACU15996.1|/2.27965e-81/unknown [Glycine max]		Glyma01g45520	3.52	15.53	2.14141	gi|255636278|gb|ACU18479.1|/7.37181e-155/unknown [Glycine max]		Glyma15g00900	68.44	29.64	-1.20729	gi|255644244|gb|ACU22686.1|/1.04064e-146/unknown [Glycine max]
Glyma02g45190	3.51	11.19	1.67267	gi|255646390|gb|ACU23674.1|/7.17243e-133/unknown [Glycine max]		Glyma18g43390	32.78	13.37	-1.29382	gi|255638745|gb|ACU19677.1|/0/unknown [Glycine max]		Glyma04g41040	2.18	8.01	1.87747	gi|255634909|gb|ACU17813.1|/0/unknown [Glycine max]		Glyma12g09010	232.78	61.83	-1.91259	gi|255639167|gb|ACU19883.1|/3.02832e-93/unknown [Glycine max]		Glyma03g08740	21.47	62.75	1.54729	gi|255632324|gb|ACU16520.1|/5.5994e-09/unknown [Glycine max]		Glyma13g38560	36.93	12.38	-1.57678	gi|255632374|gb|ACU16537.1|/3.86013e-70/unknown [Glycine max]		Glyma08g22370	5.28	23.29	2.1411	gi|255640540|gb|ACU20555.1|/4.99693e-65/unknown [Glycine max]		Glyma10g02430	38.71	16.76	-1.20768	gi|255640785|gb|ACU20676.1|/4.54856e-32/unknown [Glycine max]
Glyma14g25830	10.34	32.91	1.67029	gi|255630379|gb|ACU15546.1|/3.1301e-59/unknown [Glycine max]		Glyma10g35000	20.86	8.52	-1.29181	gi|255632960|gb|ACU16834.1|/6.63009e-06/unknown [Glycine max]		Glyma03g41240	5.09	18.64	1.87266	gi|255645935|gb|ACU23456.1|/1.70802e-49/unknown [Glycine max]		Glyma20g38440	286.75	75.59	-1.92353	gi|255627415|gb|ACU14052.1|/6.65011e-119/unknown [Glycine max]		Glyma08g08770	40.21	117.14	1.54261	gi|255647962|gb|ACU24438.1|/2.65828e-144/unknown [Glycine max]		Glyma02g38450	161.93	54.39	-1.57396	gi|255626107|gb|ACU13398.1|/2.80771e-128/unknown [Glycine max]		Glyma14g08230	11.61	51.17	2.13993	gi|255634412|gb|ACU17571.1|/4.77883e-44/unknown [Glycine max]		Glyma05g36020	32.2	13.94	-1.20783	gi|255640082|gb|ACU20332.1|/4.86477e-138/unknown [Glycine max]
Glyma09g38610	9.64	30.57	1.66501	gi|255631856|gb|ACU16295.1|/2.93198e-98/unknown [Glycine max]		Glyma04g38140	45.23	18.54	-1.28664	gi|255637680|gb|ACU19163.1|/4.23772e-66/unknown [Glycine max]		Glyma09g01220	2	7.31	1.86987	gi|255632254|gb|ACU16485.1|/9.31196e-79/unknown [Glycine max]		Glyma13g27090	9.27	2.44	-1.92569	gi|255642497|gb|ACU21512.1|/0/unknown [Glycine max]		Glyma11g12630	52.22	152	1.5414	gi|255626165|gb|ACU13427.1|/1.16951e-95/unknown [Glycine max]		Glyma12g33720	19.1	6.45	-1.5662	gi|75860382|gb|ABA29158.1|/0/unknown [Pisum sativum]		Glyma15g07460	23.22	101.45	2.12733	gi|255646020|gb|ACU23497.1|/3.40581e-28/unknown [Glycine max]		Glyma01g05150	98.88	42.7	-1.21144	gi|255640875|gb|ACU20720.1|/4.20097e-121/unknown [Glycine max]
Glyma03g07750	7.71	24.39	1.66149	gi|255639560|gb|ACU20074.1|/4.53205e-117/unknown [Glycine max]		Glyma17g12960	11.74	4.84	-1.27835	gi|255645088|gb|ACU23043.1|/8.91963e-82/unknown [Glycine max]		Glyma18g48610	6.18	22.47	1.86232	gi|255637404|gb|ACU19030.1|/2.51323e-109/unknown [Glycine max]		Glyma10g08440	6	1.57	-1.9342	gi|255634724|gb|ACU17724.1|/2.12421e-132/unknown [Glycine max]		Glyma17g06560	15.47	44.97	1.53949	gi|255632626|gb|ACU16663.1|/2.03097e-36/unknown [Glycine max]		Glyma08g20320	36.03	12.2	-1.56232	gi|217074730|gb|ACJ85725.1|/0/unknown [Medicago truncatula]		Glyma02g12720	2.46	10.59	2.10597	gi|255635754|gb|ACU18226.1|/1.42411e-135/unknown [Glycine max]		Glyma13g43370	442.3	190.73	-1.21349	gi|255640766|gb|ACU20667.1|/1.08826e-53/unknown [Glycine max]
Glyma11g37450	2.8	8.85	1.66025	gi|255639776|gb|ACU20181.1|/1.44091e-108/unknown [Glycine max]		Glyma12g37080	46.98	19.38	-1.27748	gi|255646256|gb|ACU23612.1|/2.11908e-111/unknown [Glycine max]		Glyma06g42890	31.98	116.17	1.861	gi|255627241|gb|ACU13965.1|/7.20487e-73/unknown [Glycine max]		Glyma01g17820	6.72	1.74	-1.94937	gi|255628581|gb|ACU14635.1|/1.20553e-59/unknown [Glycine max]		Glyma20g29460	11.46	33.29	1.53848	gi|255636874|gb|ACU18770.1|/4.4434e-170/unknown [Glycine max]		Glyma16g23220	11.83	4.01	-1.56078	gi|255627091|gb|ACU13890.1|/8.45068e-96/unknown [Glycine max]		Glyma13g35740	9.32	40.05	2.1034	gi|255635528|gb|ACU18115.1|/0/unknown [Glycine max]		Glyma20g33110	20.06	8.65	-1.21355	gi|255628691|gb|ACU14690.1|/2.86838e-81/unknown [Glycine max]
Glyma16g23010	2.28	7.18	1.65495	gi|255627903|gb|ACU14296.1|/9.66416e-60/unknown [Glycine max]		Glyma16g01780	12.1	5.01	-1.27212	gi|255641601|gb|ACU21073.1|/4.28438e-143/unknown [Glycine max]		Glyma15g00600	10.36	37.62	1.86048	gi|255639531|gb|ACU20060.1|/0/unknown [Glycine max]		Glyma17g17330	30.35	7.84	-1.95277	gi|255627673|gb|ACU14181.1|/1.22212e-21/unknown [Glycine max]		Glyma03g22960	14.92	43.23	1.53479	gi|118489165|gb|ABK96389.1|/0/unknown [Populus trichocarpa x Populus deltoides]		Glyma07g16210	8.73	2.96	-1.56038	gi|255641320|gb|ACU20937.1|/4.11162e-133/unknown [Glycine max]		Glyma15g00730	5.1	21.88	2.10104	gi|255646531|gb|ACU23740.1|/1.43195e-115/unknown [Glycine max]		Glyma20g23310	36.07	15.53	-1.21574	gi|255645547|gb|ACU23268.1|/0/unknown [Glycine max]
Glyma08g47460	2.45	7.69	1.6502	gi|255638378|gb|ACU19500.1|/0/unknown [Glycine max]		Glyma14g04340	33.48	13.87	-1.27133	gi|255638993|gb|ACU19797.1|/3.65745e-132/unknown [Glycine max]		Glyma13g07800	4.18	15.15	1.85774	gi|255637351|gb|ACU19005.1|/8.01818e-145/unknown [Glycine max]		Glyma13g33290	10.9	2.79	-1.96599	gi|255644878|gb|ACU22939.1|/0/unknown [Glycine max]		Glyma05g36260	19.47	56.3	1.53188	gi|255637035|gb|ACU18850.1|/0/unknown [Glycine max]		Glyma13g18610	8.73	2.96	-1.56038	gi|255640957|gb|ACU20758.1|/6.35379e-96/unknown [Glycine max]		Glyma10g38950	16.89	72.34	2.09862	gi|255635149|gb|ACU17931.1|/0/unknown [Glycine max]		Glyma03g31120	18.47	7.94	-1.21797	gi|255628397|gb|ACU14543.1|/1.20507e-72/unknown [Glycine max]
Glyma08g06010	35.06	109.1	1.63775	gi|255646412|gb|ACU23685.1|/0/unknown [Glycine max]		Glyma09g40590	89.4	37.09	-1.26924	gi|255635535|gb|ACU18118.1|/1.58038e-167/unknown [Glycine max]		Glyma15g09560	6.91	24.9	1.84939	gi|217074972|gb|ACJ85846.1|/2.58007e-172/unknown [Medicago truncatula]		Glyma19g07080	28.71	7.31	-1.97361	gi|255645590|gb|ACU23289.1|/0/unknown [Glycine max]		Glyma17g10290	4.18	12.03	1.52506	gi|255648089|gb|ACU24499.1|/6.59485e-128/unknown [Glycine max]		Glyma13g27460	37.48	12.72	-1.55902	gi|255647793|gb|ACU24357.1|/5.88556e-60/unknown [Glycine max]		Glyma02g40820	25.51	109.22	2.0981	gi|255635311|gb|ACU18009.1|/0/unknown [Glycine max]		Glyma08g20730	11.08	4.76	-1.21892	gi|255636681|gb|ACU18677.1|/1.97626e-121/unknown [Glycine max]
Glyma06g04800	3.33	10.36	1.63743	gi|289540911|gb|ADD09585.1|/1.61613e-168/unknown [Trifolium repens]		Glyma08g23260	51.36	21.38	-1.26438	gi|255629085|gb|ACU14887.1|/3.09755e-43/unknown [Glycine max]		Glyma07g10070	12.54	45.11	1.84691	gi|255628529|gb|ACU14609.1|/9.14153e-116/unknown [Glycine max]		Glyma06g13520	6.91	1.74	-1.9896	gi|255637217|gb|ACU18939.1|/8.01696e-114/unknown [Glycine max]		Glyma16g34450	3.64	10.46	1.52287	gi|255638458|gb|ACU19538.1|/0/unknown [Glycine max]		Glyma18g02540	11.28	3.83	-1.55835	gi|255646735|gb|ACU23841.1|/8.12545e-52/unknown [Glycine max]		Glyma12g10810	5.98	25.58	2.0968	gi|255637282|gb|ACU18971.1|/2.07207e-59/unknown [Glycine max]		Glyma18g51640	12.32	5.29	-1.21966	gi|255630968|gb|ACU15848.1|/3.99206e-57/unknown [Glycine max]
Glyma03g28460	17.53	54.46	1.63537	gi|255633342|gb|ACU17028.1|/2.77789e-138/unknown [Glycine max]		Glyma09g40580	43.3	18.04	-1.26317	gi|255639802|gb|ACU20194.1|/7.54684e-166/unknown [Glycine max]		Glyma12g05760	2.73	9.75	1.8365	gi|255627033|gb|ACU13861.1|/2.38188e-47/unknown [Glycine max]		Glyma18g44810	6.91	1.74	-1.9896	gi|255639189|gb|ACU19893.1|/0/unknown [Glycine max]		Glyma11g02800	15.1	42.88	1.50576	gi|217074990|gb|ACJ85855.1|/2.11538e-90/unknown [Medicago truncatula]		Glyma02g41540	48.22	16.39	-1.55682	gi|255630470|gb|ACU15593.1|/1.11291e-50/unknown [Glycine max]		Glyma18g41590	16.36	69.69	2.09078	gi|255631304|gb|ACU16019.1|/1.25301e-40/unknown [Glycine max]		Glyma07g39650	25.51	10.94	-1.22145	gi|255644902|gb|ACU22951.1|/0/unknown [Glycine max]
Glyma05g02740	5.78	17.88	1.62921	gi|255634850|gb|ACU17784.1|/0/unknown [Glycine max]		Glyma08g09890	14.02	5.85	-1.26098	gi|255635048|gb|ACU17882.1|/9.80805e-171/unknown [Glycine max]		Glyma14g11960	2.73	9.75	1.8365	gi|255639826|gb|ACU20206.1|/2.67329e-83/unknown [Glycine max]		Glyma11g25660	11.81	2.96	-1.99634	gi|255630988|gb|ACU15858.1|/1.56883e-64/unknown [Glycine max]		Glyma16g34560	13.65	38.7	1.50343	gi|217072576|gb|ACJ84648.1|/4.54828e-128/unknown [Medicago truncatula]		Glyma08g07730	25.65	8.72	-1.55656	gi|255642028|gb|ACU21281.1|/6.18017e-57/unknown [Glycine max]		Glyma06g06530	6.51	27.7	2.08916	gi|255639826|gb|ACU20206.1|/2.30219e-167/unknown [Glycine max]		Glyma14g05590	11.96	5.12	-1.224	gi|255641286|gb|ACU20920.1|/0/unknown [Glycine max]
Glyma07g15960	9.47	29.24	1.62651	gi|255642211|gb|ACU21370.1|/4.98499e-152/unknown [Glycine max]		Glyma14g24810	19.98	8.35	-1.25871	gi|255630633|gb|ACU15676.1|/7.00671e-72/unknown [Glycine max]		Glyma08g11030	2	7.14	1.83592	gi|255635056|gb|ACU17886.1|/0/unknown [Glycine max]		Glyma13g36150	337.99	84.12	-2.00646	gi|255629161|gb|ACU14925.1|/3.68871e-85/unknown [Glycine max]		Glyma06g35690	4	11.33	1.50208	gi|255640470|gb|ACU20521.1|/2.63636e-61/unknown [Glycine max]		Glyma14g36620	315.31	107.2	-1.55647	gi|255626107|gb|ACU13398.1|/2.41739e-114/unknown [Glycine max]		Glyma03g27520	2.46	10.41	2.08124	gi|118486469|gb|ABK95074.1|/0/unknown [Populus trichocarpa]		Glyma05g26990	15.66	6.7	-1.22485	gi|255645596|gb|ACU23292.1|/1.60991e-116/unknown [Glycine max]
Glyma18g43130	4.73	14.53	1.61912	gi|255632228|gb|ACU16472.1|/5.06298e-92/unknown [Glycine max]		Glyma13g00870	14.37	6.01	-1.25762	gi|255628861|gb|ACU14775.1|/2.25862e-47/unknown [Glycine max]		Glyma14g05090	2	7.14	1.83592	gi|255626979|gb|ACU13834.1|/2.56868e-105/unknown [Glycine max]		Glyma11g10140	13.99	3.48	-2.00724	gi|255633400|gb|ACU17057.1|/1.44673e-100/unknown [Glycine max]		Glyma06g20950	14.19	40.09	1.49837	gi|217074600|gb|ACJ85660.1|/3.07775e-137/unknown [Medicago truncatula]		Glyma12g00330	8.19	2.79	-1.5536	gi|255636787|gb|ACU18727.1|/0/unknown [Glycine max]		Glyma02g10840	1.76	7.41	2.0739	gi|255640404|gb|ACU20489.1|/6.44904e-09/unknown [Glycine max]		Glyma11g35470	35.89	15.35	-1.22534	gi|255645875|gb|ACU23427.1|/1.38015e-119/unknown [Glycine max]
Glyma04g04690	4.03	12.36	1.61683	gi|255626035|gb|ACU13362.1|/2.07967e-10/unknown [Glycine max]		Glyma11g07560	15.95	6.68	-1.25564	gi|255640476|gb|ACU20524.1|/6.20874e-36/unknown [Glycine max]		Glyma10g43010	16.17	57.3	1.82522	gi|255632436|gb|ACU16568.1|/5.9341e-103/unknown [Glycine max]		Glyma15g27660	9.09	2.26	-2.00796	gi|255627743|gb|ACU14216.1|/1.46132e-85/unknown [Glycine max]		Glyma17g34240	6.73	19	1.49732	gi|255550119|ref|XP_002516110.1|/4.22135e-93/protein with unknown function [Ricinus communis]		Glyma06g14330	33.66	11.5	-1.5494	gi|255645127|gb|ACU23062.1|/1.19204e-104/unknown [Glycine max]		Glyma19g37970	33.78	142.21	2.07378	gi|255625615|gb|ACU13152.1|/1.66473e-33/unknown [Glycine max]		Glyma13g16470	25.16	10.76	-1.22545	gi|255635552|gb|ACU18126.1|/1.183e-162/unknown [Glycine max]
Glyma05g26140	4.03	12.36	1.61683	gi|255646565|gb|ACU23757.1|/0/unknown [Glycine max]		Glyma17g29720	13.5	5.68	-1.249	gi|255632035|gb|ACU16370.1|/8.73153e-62/unknown [Glycine max]		Glyma03g36270	10.18	36.05	1.82426	gi|255641723|gb|ACU21132.1|/0/unknown [Glycine max]		Glyma08g11140	12.72	3.13	-2.02286	gi|255644565|gb|ACU22785.1|/1.637e-72/unknown [Glycine max]		Glyma11g09390	3.46	9.76	1.49611	gi|255635062|gb|ACU17889.1|/0/unknown [Glycine max]		Glyma02g44810	22.93	7.84	-1.54831	gi|255647741|gb|ACU24331.1|/2.43794e-133/unknown [Glycine max]		Glyma03g37120	5.45	22.94	2.07354	gi|255626777|gb|ACU13733.1|/8.39996e-34/unknown [Glycine max]		Glyma04g38600	33.08	14.12	-1.22822	gi|255627911|gb|ACU14300.1|/5.26677e-41/unknown [Glycine max]
Glyma15g40940	12.45	38.09	1.61327	gi|255647188|gb|ACU24062.1|/8.90607e-127/unknown [Glycine max]		Glyma16g32650	15.08	6.35	-1.24781	gi|255640255|gb|ACU20418.1|/0/unknown [Glycine max]		Glyma11g08100	4.18	14.8	1.82402	gi|255648135|gb|ACU24522.1|/1.69859e-120/unknown [Glycine max]		Glyma10g37630	7.09	1.74	-2.0267	gi|255645321|gb|ACU23157.1|/5.0624e-142/unknown [Glycine max]		Glyma04g14710	12.01	33.82	1.49364	gi|255627755|gb|ACU14222.1|/8.28221e-75/unknown [Glycine max]		Glyma01g43080	20.38	6.97	-1.54792	gi|255628979|gb|ACU14834.1|/9.55804e-40/unknown [Glycine max]		Glyma14g02380	3.34	13.94	2.06131	gi|255635914|gb|ACU18304.1|/0/unknown [Glycine max]		Glyma13g44380	81.46	34.76	-1.22866	gi|255627569|gb|ACU14129.1|/2.39213e-125/unknown [Glycine max]
Glyma14g08170	7.54	23.06	1.61276	gi|255647743|gb|ACU24332.1|/7.1822e-158/unknown [Glycine max]		Glyma12g36320	583.04	245.76	-1.24634	gi|255626527|gb|ACU13608.1|/4.43961e-81/unknown [Glycine max]		Glyma13g15790	1.82	6.44	1.82312	gi|255634708|gb|ACU17716.1|/0/unknown [Glycine max]		Glyma03g04920	271.12	66.53	-2.02685	gi|255640734|gb|ACU20651.1|/4.89671e-49/unknown [Glycine max]		Glyma02g41340	14.74	41.49	1.49303	gi|255635407|gb|ACU18056.1|/0/unknown [Glycine max]		Glyma14g00770	35.66	12.2	-1.54743	gi|255629950|gb|ACU15327.1|/4.0449e-42/unknown [Glycine max]		Glyma10g12110	1.23	5.12	2.05749	gi|255636322|gb|ACU18500.1|/3.8325e-109/unknown [Glycine max]		Glyma04g20610	87.26	37.23	-1.22885	gi|255628411|gb|ACU14550.1|/3.23556e-68/unknown [Glycine max]
Glyma02g42470	23.14	70.67	1.61071	gi|255636356|gb|ACU18517.1|/4.77301e-169/unknown [Glycine max]		Glyma05g28490	156.37	65.99	-1.24464	gi|255642128|gb|ACU21329.1|/0/unknown [Glycine max]		Glyma13g37350	1.82	6.44	1.82312	gi|255639433|gb|ACU20011.1|/6.14506e-138/unknown [Glycine max]		Glyma03g31530	8.54	2.09	-2.03073	gi|255642227|gb|ACU21378.1|/7.79427e-112/unknown [Glycine max]		Glyma08g11070	40.21	113.13	1.49236	gi|255640724|gb|ACU20646.1|/1.44449e-66/unknown [Glycine max]		Glyma05g03890	9.64	3.31	-1.5422	gi|255639123|gb|ACU19861.1|/0/unknown [Glycine max]		Glyma18g47710	21.99	91.4	2.05535	gi|255630008|gb|ACU15356.1|/1.30268e-95/unknown [Glycine max]		Glyma10g36240	14.07	6	-1.22959	gi|255630635|gb|ACU15677.1|/3.70407e-56/unknown [Glycine max]
Glyma05g34960	81.86	249.27	1.60648	gi|255642012|gb|ACU21273.1|/5.69101e-114/unknown [Glycine max]		Glyma16g08940	22.44	9.52	-1.23704	gi|255631187|gb|ACU15959.1|/7.52274e-57/unknown [Glycine max]		Glyma17g03330	2.91	10.28	1.82075	gi|255630496|gb|ACU15606.1|/2.58322e-86/unknown [Glycine max]		Glyma18g48070	44.88	10.97	-2.03251	gi|255647714|gb|ACU24318.1|/8.01302e-168/unknown [Glycine max]		Glyma10g23440	50.22	141.02	1.48957	gi|255637560|gb|ACU19106.1|/5.71469e-61/unknown [Glycine max]		Glyma01g42440	16.19	5.58	-1.53677	gi|255645229|gb|ACU23112.1|/1.12257e-157/unknown [Glycine max]		Glyma13g31180	7.57	31.41	2.05286	gi|255626481|gb|ACU13585.1|/1.18544e-67/unknown [Glycine max]		Glyma15g15120	93.6	39.88	-1.23084	gi|255626329|gb|ACU13509.1|/7.63757e-19/unknown [Glycine max]
Glyma06g20600	2.8	8.52	1.60543	gi|255645528|gb|ACU23259.1|/8.03938e-160/unknown [Glycine max]		Glyma03g05010	54.34	23.22	-1.22665	gi|255631528|gb|ACU16131.1|/2.78755e-105/unknown [Glycine max]		Glyma03g40110	11.99	42.32	1.81951	gi|255625645|gb|ACU13167.1|/5.92067e-61/unknown [Glycine max]		Glyma04g34160	6.54	1.57	-2.05853	gi|255641192|gb|ACU20873.1|/3.92409e-162/unknown [Glycine max]		Glyma02g10580	6.73	18.83	1.48435	gi|255644613|gb|ACU22809.1|/0/unknown [Glycine max]		Glyma16g08440	22.74	7.84	-1.53631	gi|255626419|gb|ACU13554.1|/1.55402e-67/unknown [Glycine max]		Glyma01g38160	2.64	10.94	2.051	gi|255629351|gb|ACU15020.1|/9.99076e-20/unknown [Glycine max]		Glyma03g38110	11.61	4.94	-1.23279	gi|255626377|gb|ACU13533.1|/7.51902e-63/unknown [Glycine max]
Glyma17g20380	2.8	8.52	1.60543	gi|255629309|gb|ACU14999.1|/2.82381e-29/unknown [Glycine max]		Glyma19g02370	94.84	40.6	-1.22402	gi|217074028|gb|ACJ85374.1|/7.0071e-134/unknown [Medicago truncatula]		Glyma12g03990	8.54	30.13	1.81889	gi|255629875|gb|ACU15288.1|/5.37774e-55/unknown [Glycine max]		Glyma01g24950	32.89	7.84	-2.06872	gi|217072642|gb|ACJ84681.1|/4.0284e-147/unknown [Medicago truncatula]		Glyma03g28460	17.1	47.76	1.48181	gi|255633342|gb|ACU17028.1|/2.77789e-138/unknown [Glycine max]		Glyma09g31870	8.55	2.96	-1.53033	gi|255648367|gb|ACU24634.1|/1.30888e-86/unknown [Glycine max]		Glyma03g32610	1.76	7.23	2.03842	gi|255630534|gb|ACU15625.1|/9.15671e-50/unknown [Glycine max]		Glyma15g06760	11.61	4.94	-1.23279	gi|255641603|gb|ACU21074.1|/3.38072e-130/unknown [Glycine max]
Glyma15g06770	13.67	41.43	1.59966	gi|255633190|gb|ACU16951.1|/1.18943e-95/unknown [Glycine max]		Glyma08g02110	12.45	5.35	-1.21853	gi|255633316|gb|ACU17015.1|/1.50615e-33/unknown [Glycine max]		Glyma15g13230	5.45	19.16	1.81377	gi|217075472|gb|ACJ86096.1|/5.16453e-110/unknown [Medicago truncatula]		Glyma03g12150	11.81	2.79	-2.08167	gi|255633504|gb|ACU17110.1|/1.21059e-25/unknown [Glycine max]		Glyma04g40810	189.59	529.39	1.48145	gi|255625869|gb|ACU13279.1|/5.13521e-11/unknown [Glycine max]		Glyma09g12570	38.21	13.25	-1.52796	gi|255628167|gb|ACU14428.1|/1.40282e-23/unknown [Glycine max]		Glyma04g00980	2.99	12.17	2.02511	gi|255637988|gb|ACU19310.1|/2.91463e-110/unknown [Glycine max]		Glyma20g00780	29.91	12.7	-1.2358	gi|255645802|gb|ACU23392.1|/6.47412e-84/unknown [Glycine max]
Glyma13g18490	3.33	10.02	1.58929	gi|255644569|gb|ACU22787.1|/6.03932e-107/unknown [Glycine max]		Glyma10g00970	68.19	29.57	-1.20543	gi|255630500|gb|ACU15608.1|/6.58395e-29/unknown [Glycine max]		Glyma06g19720	76.5	268.38	1.81075	gi|255625763|gb|ACU13226.1|/6.77253e-47/unknown [Glycine max]		Glyma13g07620	21.44	5.05	-2.08595	gi|255625985|gb|ACU13337.1|/2.01931e-87/unknown [Glycine max]		Glyma10g00970	43.67	121.5	1.47624	gi|255630500|gb|ACU15608.1|/6.58395e-29/unknown [Glycine max]		Glyma09g06470	14.56	5.06	-1.5248	gi|255635774|gb|ACU18236.1|/1.38172e-156/unknown [Glycine max]		Glyma19g26390	2.99	12.17	2.02511	gi|255635507|gb|ACU18105.1|/1.30867e-122/unknown [Glycine max]		Glyma17g10290	18.3	7.76	-1.23772	gi|255648089|gb|ACU24499.1|/6.59485e-128/unknown [Glycine max]
Glyma07g32980	32.25	96.9	1.5872	gi|255632876|gb|ACU16791.1|/7.22199e-87/unknown [Glycine max]		Glyma13g37610	62.23	27.07	-1.20092	gi|255626917|gb|ACU13803.1|/4.42982e-109/unknown [Glycine max]		Glyma18g15970	5.81	20.38	1.81054	gi|255636723|gb|ACU18697.1|/3.02935e-142/unknown [Glycine max]		Glyma02g37060	84.32	19.85	-2.08674	gi|255637507|gb|ACU19080.1|/2.16532e-158/unknown [Glycine max]		Glyma03g39390	8.73	24.23	1.47274	gi|255635882|gb|ACU18288.1|/1.71619e-136/unknown [Glycine max]		Glyma06g14650	8.01	2.79	-1.52154	gi|255646557|gb|ACU23753.1|/0/unknown [Glycine max]		Glyma08g18640	36.42	148.03	2.02309	gi|255637207|gb|ACU18934.1|/4.00631e-127/unknown [Glycine max]		Glyma19g38530	18.3	7.76	-1.23772	gi|255630381|gb|ACU15547.1|/1.2471e-77/unknown [Glycine max]
Glyma19g43460	4.56	13.7	1.58707	gi|255629027|gb|ACU14858.1|/1.1729e-119/unknown [Glycine max]		Glyma11g05160	111.14	48.45	-1.19781	gi|255640610|gb|ACU20590.1|/5.61749e-59/unknown [Glycine max]		Glyma12g31970	6.54	22.82	1.80294	gi|255645849|gb|ACU23415.1|/1.71304e-135/unknown [Glycine max]		Glyma01g41580	9.63	2.26	-2.09121	gi|217072862|gb|ACJ84791.1|/2.22928e-81/unknown [Medicago truncatula]		Glyma13g44700	10.55	29.28	1.47267	gi|255637972|gb|ACU19302.1|/8.31923e-176/unknown [Glycine max]		Glyma14g04920	8.01	2.79	-1.52154	gi|87241272|gb|ABD33130.1|/2.33028e-117/Protein of unknown function DUF652 [Medicago truncatula]		Glyma02g41520	3.87	15.7	2.02036	gi|255630470|gb|ACU15593.1|/1.4747e-72/unknown [Glycine max]		Glyma08g46950	29.21	12.35	-1.24195	gi|255644378|gb|ACU22694.1|/0/unknown [Glycine max]
Glyma11g04520	9.82	29.4	1.58202	gi|255629926|gb|ACU15315.1|/2.25996e-15/unknown [Glycine max]		Glyma10g03840	55.74	24.39	-1.19242	gi|255641934|gb|ACU21235.1|/4.4055e-23/unknown [Glycine max]		Glyma13g23530	2.91	10.1	1.79526	gi|255629137|gb|ACU14913.1|/5.16401e-51/unknown [Glycine max]		Glyma04g40450	226.78	53.12	-2.09397	gi|255646322|gb|ACU23644.1|/0/unknown [Glycine max]		Glyma15g00350	9.83	27.19	1.46781	gi|255646060|gb|ACU23517.1|/0/unknown [Glycine max]		Glyma19g37970	160.66	56.13	-1.51717	gi|255625615|gb|ACU13152.1|/1.66473e-33/unknown [Glycine max]		Glyma15g10160	12.49	50.64	2.0195	gi|255636971|gb|ACU18818.1|/0/unknown [Glycine max]		Glyma12g06300	38	16.06	-1.24253	gi|255637970|gb|ACU19301.1|/2.2214e-125/unknown [Glycine max]
Glyma12g33110	6.31	18.88	1.58115	gi|255639433|gb|ACU20011.1|/2.43054e-124/unknown [Glycine max]		Glyma11g03670	19.81	8.69	-1.1888	gi|255647710|gb|ACU24316.1|/2.95074e-96/unknown [Glycine max]		Glyma14g07540	3.27	11.32	1.79151	gi|255628101|gb|ACU14395.1|/2.00088e-58/unknown [Glycine max]		Glyma09g38990	12.72	2.96	-2.10343	gi|255642519|gb|ACU21523.1|/1.52693e-79/unknown [Glycine max]		Glyma13g40340	9.46	26.15	1.4669	gi|255631016|gb|ACU15872.1|/3.44564e-08/unknown [Glycine max]		Glyma01g43300	9.46	3.31	-1.51501	gi|255630518|gb|ACU15617.1|/2.79774e-61/unknown [Glycine max]		Glyma16g27570	5.45	22.06	2.0171	gi|255633200|gb|ACU16956.1|/2.30133e-86/unknown [Glycine max]		Glyma10g29200	46.8	19.76	-1.24393	gi|255627947|gb|ACU14318.1|/4.59679e-58/unknown [Glycine max]
Glyma15g40570	2.8	8.35	1.57635	gi|255645373|gb|ACU23183.1|/1.83547e-124/unknown [Glycine max]		Glyma17g14840	13.32	5.85	-1.18709	gi|255633300|gb|ACU17007.1|/1.31241e-50/unknown [Glycine max]		Glyma05g31580	12.54	43.37	1.79016	gi|255630605|gb|ACU15662.1|/3.45842e-22/unknown [Glycine max]		Glyma12g30730	12.72	2.96	-2.10343	gi|255628995|gb|ACU14842.1|/7.2686e-54/unknown [Glycine max]		Glyma14g19970	11.28	31.03	1.4599	gi|217074022|gb|ACJ85371.1|/1.08439e-116/unknown [Medicago truncatula]		Glyma05g00730	13.46	4.71	-1.51488	gi|255635388|gb|ACU18047.1|/0/unknown [Glycine max]		Glyma07g05940	4.93	19.94	2.01601	gi|255633478|gb|ACU17097.1|/2.69601e-89/unknown [Glycine max]		Glyma14g39940	967.65	408.46	-1.24429	gi|255646899|gb|ACU23919.1|/4.29461e-152/unknown [Glycine max]
Glyma17g37020	173.37	515.41	1.57187	gi|255631794|gb|ACU16264.1|/7.44616e-65/unknown [Glycine max]		Glyma17g12310	11.39	5.01	-1.18489	gi|255628289|gb|ACU14489.1|/9.84042e-47/unknown [Glycine max]		Glyma14g00590	5.09	17.59	1.78902	gi|255635323|gb|ACU18015.1|/3.5722e-134/unknown [Glycine max]		Glyma15g37480	24.71	5.75	-2.10346	gi|255638149|gb|ACU19388.1|/0/unknown [Glycine max]		Glyma14g16700	39.12	107.38	1.45675	gi|255635979|gb|ACU18335.1|/1.04401e-165/unknown [Glycine max]		Glyma17g29330	58.59	20.57	-1.51011	gi|255629245|gb|ACU14967.1|/6.26123e-07/unknown [Glycine max]		Glyma17g34870	436.85	1756.3	2.00733	gi|255628515|gb|ACU14602.1|/1.26901e-17/unknown [Glycine max]		Glyma13g07280	30.96	13.06	-1.24525	gi|255638063|gb|ACU19346.1|/7.48297e-167/unknown [Glycine max]
Glyma13g33290	7.01	20.72	1.56354	gi|255644878|gb|ACU22939.1|/0/unknown [Glycine max]		Glyma07g37720	26.12	11.53	-1.17976	gi|255638817|gb|ACU19712.1|/1.46889e-85/unknown [Glycine max]		Glyma02g15370	7.27	25.08	1.78651	gi|255637063|gb|ACU18863.1|/0/unknown [Glycine max]		Glyma03g34420	35.07	8.01	-2.13036	gi|255637756|gb|ACU19200.1|/0/unknown [Glycine max]		Glyma06g14290	34.75	95	1.45091	gi|255646322|gb|ACU23644.1|/0/unknown [Glycine max]		Glyma07g02480	8.92	3.14	-1.50628	gi|255637318|gb|ACU18989.1|/9.0861e-67/unknown [Glycine max]		Glyma17g34670	2.81	11.29	2.0064	gi|217071372|gb|ACJ84046.1|/8.59302e-33/unknown [Medicago truncatula]		Glyma10g05130	12.14	5.12	-1.24555	gi|255627557|gb|ACU14123.1|/8.82399e-117/unknown [Glycine max]
Glyma18g03530	3.68	10.86	1.56125	gi|255645412|gb|ACU23202.1|/0/unknown [Glycine max]		Glyma07g09790	28.75	12.7	-1.17873	gi|255629688|gb|ACU15193.1|/4.16924e-85/unknown [Glycine max]		Glyma17g14920	17.44	59.91	1.7804	gi|255629766|gb|ACU15232.1|/1.89607e-18/unknown [Glycine max]		Glyma20g23370	15.45	3.48	-2.15045	gi|255628875|gb|ACU14782.1|/4.07893e-83/unknown [Glycine max]		Glyma19g28500	41.85	114.35	1.45016	gi|255645029|gb|ACU23014.1|/1.2469e-120/unknown [Glycine max]		Glyma11g10700	17.83	6.28	-1.50547	gi|255644918|gb|ACU22959.1|/7.00036e-175/unknown [Glycine max]		Glyma18g48420	2.46	9.88	2.00585	gi|255647249|gb|ACU24092.1|/7.94419e-96/unknown [Glycine max]		Glyma16g08200	34.31	14.47	-1.24556	gi|255636806|gb|ACU18736.1|/2.162e-108/unknown [Glycine max]
Glyma02g05370	23.49	68.83	1.55099	gi|255645121|gb|ACU23059.1|/5.15692e-130/unknown [Glycine max]		Glyma18g52210	21.04	9.36	-1.16855	gi|255647733|gb|ACU24327.1|/2.02377e-40/unknown [Glycine max]		Glyma17g01030	17.08	58.52	1.77662	gi|22597168|gb|AAN03471.1|/3.33544e-35/unknown protein [Glycine max]		Glyma09g29360	8.54	1.92	-2.15313	gi|255631958|gb|ACU16359.1|/5.36518e-107/unknown [Glycine max]		Glyma16g06840	3.64	9.94	1.44931	gi|255641492|gb|ACU21021.1|/4.4381e-127/unknown [Glycine max]		Glyma17g37760	31.66	11.16	-1.50432	gi|255629313|gb|ACU15001.1|/8.62711e-45/unknown [Glycine max]		Glyma19g03010	3.69	14.82	2.00585	gi|255638612|gb|ACU19612.1|/0/unknown [Glycine max]		Glyma15g09530	140.57	59.28	-1.24567	gi|255636449|gb|ACU18563.1|/0/unknown [Glycine max]
Glyma18g14900	2.8	8.19	1.54844	gi|255631097|gb|ACU15914.1|/5.61608e-87/unknown [Glycine max]		Glyma14g11160	16.13	7.18	-1.16769	gi|255626167|gb|ACU13428.1|/5.84649e-87/unknown [Glycine max]		Glyma13g02230	6.72	22.99	1.77447	gi|255629990|gb|ACU15347.1|/2.87193e-40/unknown [Glycine max]		Glyma11g10240	184.08	41.28	-2.15682	gi|217071872|gb|ACJ84296.1|/1.67136e-127/unknown [Medicago truncatula]		Glyma04g09550	5.82	15.86	1.4463	gi|255645947|gb|ACU23462.1|/0/unknown [Glycine max]		Glyma03g26520	13.83	4.88	-1.50285	gi|255631758|gb|ACU16246.1|/2.18287e-127/unknown [Glycine max]		Glyma20g38220	2.46	9.88	2.00585	gi|255647130|gb|ACU24033.1|/0/unknown [Glycine max]		Glyma07g29990	67.03	28.23	-1.24758	gi|255630587|gb|ACU15653.1|/2.50309e-42/unknown [Glycine max]
Glyma14g30490	5.43	15.87	1.54728	gi|255645249|gb|ACU23122.1|/0/unknown [Glycine max]		Glyma03g30890	163.9	73.01	-1.16665	gi|255632739|gb|ACU16721.1|/5.54947e-11/unknown [Glycine max]		Glyma18g05620	3.27	11.15	1.76968	gi|255638297|gb|ACU19461.1|/7.41804e-99/unknown [Glycine max]		Glyma12g31900	12.54	2.79	-2.1682	gi|217072308|gb|ACJ84514.1|/7.23041e-74/unknown [Medicago truncatula]		Glyma08g04070	27.47	74.78	1.4448	gi|255647718|gb|ACU24320.1|/7.01772e-154/unknown [Glycine max]		Glyma07g39530	11.83	4.18	-1.50088	gi|255645561|gb|ACU23275.1|/8.73267e-174/unknown [Glycine max]		Glyma03g35550	1.41	5.65	2.00256	gi|255645082|gb|ACU23040.1|/5.39009e-118/unknown [Glycine max]		Glyma14g04340	19.35	8.12	-1.25278	gi|255638993|gb|ACU19797.1|/3.65745e-132/unknown [Glycine max]
Glyma11g01020	5.78	16.87	1.54532	gi|217073460|gb|ACJ85089.1|/5.49897e-176/unknown [Medicago truncatula]		Glyma07g16950	38.57	17.21	-1.16423	gi|255628321|gb|ACU14505.1|/7.38896e-83/unknown [Glycine max]		Glyma14g25830	8	27.17	1.76394	gi|255630379|gb|ACU15546.1|/3.1301e-59/unknown [Glycine max]		Glyma08g22680	5.63	1.22	-2.20625	gi|255625865|gb|ACU13277.1|/1.51978e-77/unknown [Glycine max]		Glyma06g13680	19.1	51.95	1.44355	gi|255628561|gb|ACU14625.1|/5.14067e-58/unknown [Glycine max]		Glyma02g18260	93.88	33.29	-1.49573	gi|255631898|gb|ACU16316.1|/9.24529e-43/unknown [Glycine max]		Glyma18g47140	1.41	5.65	2.00256	gi|255640002|gb|ACU20292.1|/0/unknown [Glycine max]		Glyma13g20470	39.94	16.76	-1.25281	gi|255638191|gb|ACU19409.1|/0/unknown [Glycine max]
Glyma01g05850	3.33	9.69	1.54097	gi|255628569|gb|ACU14629.1|/8.30843e-129/unknown [Glycine max]		Glyma04g11120	25.42	11.36	-1.162	gi|255644536|gb|ACU22771.1|/0/unknown [Glycine max]		Glyma15g10840	6.36	21.6	1.76393	gi|255637050|gb|ACU18857.1|/0/unknown [Glycine max]		Glyma13g36170	8.9	1.92	-2.2127	gi|255636705|gb|ACU18688.1|/0/unknown [Glycine max]		Glyma07g17000	3.28	8.89	1.43849	gi|255631598|gb|ACU16166.1|/8.51237e-54/unknown [Glycine max]		Glyma15g08450	27.47	9.76	-1.4929	gi|255640139|gb|ACU20360.1|/4.27697e-166/unknown [Glycine max]		Glyma04g05320	37.47	149.45	1.99586	gi|255640257|gb|ACU20419.1|/0/unknown [Glycine max]		Glyma05g37300	179.98	75.52	-1.25291	gi|255645926|gb|ACU23452.1|/7.7326e-116/unknown [Glycine max]
Glyma10g29810	3.16	9.19	1.54014	gi|255647009|gb|ACU23973.1|/1.40667e-155/unknown [Glycine max]		Glyma02g15910	56.45	25.23	-1.16183	gi|255641934|gb|ACU21235.1|/1.05007e-25/unknown [Glycine max]		Glyma07g37280	6.36	21.42	1.75186	gi|255632051|gb|ACU16378.1|/1.20622e-86/unknown [Glycine max]		Glyma13g19560	29.62	6.27	-2.24003	gi|255639717|gb|ACU20152.1|/5.62434e-41/unknown [Glycine max]		Glyma07g15790	10.37	28.06	1.4361	gi|255631362|gb|ACU16048.1|/7.11409e-27/unknown [Glycine max]		Glyma13g33000	45.12	16.04	-1.49209	gi|255626551|gb|ACU13620.1|/7.73465e-83/unknown [Glycine max]		Glyma07g09980	13.02	51.87	1.99417	gi|255541790|ref|XP_002511959.1|/1.95787e-161/protein with unknown function [Ricinus communis]		Glyma07g13780	17.24	7.23	-1.25369	gi|255638743|gb|ACU19676.1|/0/unknown [Glycine max]
Glyma06g45200	3.68	10.69	1.53848	gi|255639885|gb|ACU20235.1|/0/unknown [Glycine max]		Glyma18g52680	34.53	15.54	-1.15186	gi|255632697|gb|ACU16700.1|/5.01921e-56/unknown [Glycine max]		Glyma13g28210	4.36	14.63	1.74653	gi|255637050|gb|ACU18857.1|/0/unknown [Glycine max]		Glyma12g32070	7.45	1.57	-2.24648	gi|255627895|gb|ACU14292.1|/2.99208e-91/unknown [Glycine max]		Glyma12g31750	5.09	13.77	1.43579	gi|255628385|gb|ACU14537.1|/1.63638e-76/unknown [Glycine max]		Glyma01g00400	46.58	16.56	-1.49201	gi|255627677|gb|ACU14183.1|/2.9456e-110/unknown [Glycine max]		Glyma04g34330	108.38	422.4	1.96251	gi|217069960|gb|ACJ83340.1|/1.77428e-36/unknown [Medicago truncatula]		Glyma15g15380	91.31	38.29	-1.25381	gi|255631550|gb|ACU16142.1|/8.00015e-48/unknown [Glycine max]
Glyma12g07610	3.86	11.19	1.53554	gi|255631016|gb|ACU15872.1|/6.02596e-47/unknown [Glycine max]		Glyma12g10590	32.25	14.53	-1.15026	gi|255625753|gb|ACU13221.1|/3.86644e-121/unknown [Glycine max]		Glyma04g41260	7.27	24.38	1.74567	gi|255633426|gb|ACU17071.1|/1.25235e-89/unknown [Glycine max]		Glyma08g48040	21.62	4.53	-2.25478	gi|118481089|gb|ABK92498.1|/4.73316e-91/unknown [Populus trichocarpa]		Glyma17g17810	5.28	14.12	1.41913	gi|255647903|gb|ACU24410.1|/2.03604e-160/unknown [Glycine max]		Glyma03g27570	38.21	13.6	-1.49034	gi|255628877|gb|ACU14783.1|/1.31234e-80/unknown [Glycine max]		Glyma14g05010	2.81	10.94	1.96097	gi|255639399|gb|ACU19995.1|/1.77866e-172/unknown [Glycine max]		Glyma14g39760	11.79	4.94	-1.25498	gi|255644412|gb|ACU22711.1|/6.59761e-174/unknown [Glycine max]
Glyma13g21210	4.21	12.2	1.53499	gi|255626751|gb|ACU13720.1|/9.42036e-52/unknown [Glycine max]		Glyma13g39490	70.82	31.91	-1.15015	gi|255628041|gb|ACU14365.1|/2.42974e-17/unknown [Glycine max]		Glyma18g43980	2.18	7.31	1.74554	gi|255635396|gb|ACU18051.1|/0/unknown [Glycine max]		Glyma14g21160	6.72	1.39	-2.27338	gi|255636576|gb|ACU18626.1|/4.18666e-61/unknown [Glycine max]		Glyma11g19860	24.93	66.59	1.41742	gi|255645984|gb|ACU23480.1|/0/unknown [Glycine max]		Glyma15g21500	9.28	3.31	-1.48729	gi|255647687|gb|ACU24305.1|/0/unknown [Glycine max]		Glyma15g12080	2.81	10.94	1.96097	gi|255638983|gb|ACU19792.1|/1.77877e-61/unknown [Glycine max]		Glyma19g30860	54.19	22.58	-1.26298	gi|255640913|gb|ACU20739.1|/1.88044e-49/unknown [Glycine max]
Glyma12g05320	4.73	13.7	1.53426	gi|255631084|gb|ACU15907.1|/7.38245e-38/unknown [Glycine max]		Glyma15g07810	19.63	8.85	-1.14931	gi|255641109|gb|ACU20833.1|/2.08269e-99/unknown [Glycine max]		Glyma10g42540	4	13.41	1.74524	gi|255626885|gb|ACU13787.1|/2.14986e-82/unknown [Glycine max]		Glyma17g11210	18.9	3.83	-2.30297	gi|255637562|gb|ACU19107.1|/0/unknown [Glycine max]		Glyma08g07230	11.64	31.03	1.41457	gi|255627869|gb|ACU14279.1|/2.19977e-86/unknown [Glycine max]		Glyma12g00970	607.15	216.67	-1.48655	gi|255632717|gb|ACU16710.1|/8.89113e-41/unknown [Glycine max]		Glyma07g30070	34.31	133.04	1.95516	gi|255640930|gb|ACU20746.1|/1.7943e-97/unknown [Glycine max]		Glyma02g05870	44.51	18.53	-1.26427	gi|255633034|gb|ACU16872.1|/9.57758e-49/unknown [Glycine max]
Glyma07g23260	9.99	28.74	1.5245	gi|21700771|gb|AAG38147.1|/8.35781e-109/unknown [Glycine max]		Glyma17g34240	40.32	18.21	-1.14676	gi|255550119|ref|XP_002516110.1|/4.22135e-93/protein with unknown function [Ricinus communis]		Glyma03g40130	17.81	59.39	1.73753	gi|255625645|gb|ACU13167.1|/5.36538e-46/unknown [Glycine max]		Glyma12g07030	63.96	12.89	-2.31092	gi|255626827|gb|ACU13758.1|/2.39557e-46/unknown [Glycine max]		Glyma10g38960	19.83	52.47	1.40381	gi|255630794|gb|ACU15758.1|/9.62408e-108/unknown [Glycine max]		Glyma06g20830	10.73	3.83	-1.48623	gi|255628287|gb|ACU14488.1|/3.80356e-61/unknown [Glycine max]		Glyma17g33100	4.93	19.06	1.95089	gi|255634526|gb|ACU17626.1|/2.7176e-92/unknown [Glycine max]		Glyma13g37140	131.07	54.52	-1.26548	gi|255647681|gb|ACU24302.1|/0/unknown [Glycine max]
Glyma08g19420	16.83	48.28	1.52039	gi|217072994|gb|ACJ84857.1|/0/unknown [Medicago truncatula]		Glyma08g12530	16.65	7.52	-1.14672	gi|255628785|gb|ACU14737.1|/1.23773e-100/unknown [Glycine max]		Glyma15g02200	4.18	13.93	1.73662	gi|255631332|gb|ACU16033.1|/2.30818e-69/unknown [Glycine max]		Glyma17g23740	148.82	29.08	-2.35547	gi|255642301|gb|ACU21415.1|/1.82316e-126/unknown [Glycine max]		Glyma18g39690	54.22	143.11	1.40023	gi|255627801|gb|ACU14245.1|/6.39998e-21/unknown [Glycine max]		Glyma15g01220	95.7	34.17	-1.48579	gi|255626337|gb|ACU13513.1|/7.4838e-99/unknown [Glycine max]		Glyma10g39600	4.57	17.64	1.94858	gi|255629428|gb|ACU15060.1|/5.89237e-156/unknown [Glycine max]		Glyma16g08470	26.74	11.12	-1.26584	gi|255641899|gb|ACU21218.1|/0/unknown [Glycine max]
Glyma15g14690	2.8	8.02	1.51818	gi|217074110|gb|ACJ85415.1|/0/unknown [Medicago truncatula]		Glyma06g46180	37.69	17.04	-1.14526	gi|255632256|gb|ACU16486.1|/3.23453e-117/unknown [Glycine max]		Glyma09g40580	2.36	7.84	1.73207	gi|255639802|gb|ACU20194.1|/7.54684e-166/unknown [Glycine max]		Glyma17g12710	379.24	74.02	-2.35712	gi|255640770|gb|ACU20669.1|/6.62106e-67/unknown [Glycine max]		Glyma13g23890	8.73	23.01	1.39821	gi|255635463|gb|ACU18084.1|/1.05459e-134/unknown [Glycine max]		Glyma05g26660	80.97	28.94	-1.48432	gi|255640247|gb|ACU20414.1|/0/unknown [Glycine max]		Glyma05g03660	3.52	13.41	1.92966	gi|255647867|gb|ACU24392.1|/1.17737e-111/unknown [Glycine max]		Glyma08g24950	19.53	8.12	-1.26614	gi|217073079|gb|ACJ84899.1|/8.09225e-109/unknown [Medicago truncatula]
Glyma18g08070	9.82	28.07	1.51523	gi|255638715|gb|ACU19662.1|/2.36913e-180/unknown [Glycine max]		Glyma13g36150	17.35	7.85	-1.14417	gi|255629161|gb|ACU14925.1|/3.68871e-85/unknown [Glycine max]		Glyma06g08830	9.09	30.13	1.72885	gi|255640764|gb|ACU20666.1|/2.72746e-52/unknown [Glycine max]		Glyma12g02460	18.35	3.48	-2.39862	gi|255633400|gb|ACU17057.1|/2.26744e-77/unknown [Glycine max]		Glyma09g04090	5.82	15.34	1.39821	gi|255644402|gb|ACU22706.1|/3.45801e-137/unknown [Glycine max]		Glyma10g00890	290.57	103.89	-1.48383	gi|255638035|gb|ACU19332.1|/2.20344e-117/unknown [Glycine max]		Glyma13g04910	3.52	13.41	1.92966	gi|255638564|gb|ACU19589.1|/0/unknown [Glycine max]		Glyma02g10860	41.17	17.11	-1.26675	gi|255632171|gb|ACU16445.1|/1.26779e-85/unknown [Glycine max]
Glyma13g00560	38.74	110.6	1.51346	gi|255625807|gb|ACU13248.1|/1.85216e-54/unknown [Glycine max]		Glyma08g23250	17.71	8.02	-1.14289	gi|255641330|gb|ACU20942.1|/2.54868e-165/unknown [Glycine max]		Glyma17g37020	15.08	49.98	1.72871	gi|255631794|gb|ACU16264.1|/7.44616e-65/unknown [Glycine max]		Glyma10g26740	27.44	5.05	-2.44193	gi|255628443|gb|ACU14566.1|/2.45979e-23/unknown [Glycine max]		Glyma09g02600	289.11	760.88	1.39605	gi|255637517|gb|ACU19085.1|/0/unknown [Glycine max]		Glyma10g04820	11.64	4.18	-1.47752	gi|255634630|gb|ACU17677.1|/5.6459e-118/unknown [Glycine max]		Glyma13g03510	1.76	6.7	1.92859	gi|255644789|gb|ACU22896.1|/1.8076e-133/unknown [Glycine max]		Glyma03g40510	120.34	49.93	-1.26914	gi|255629051|gb|ACU14870.1|/1.64849e-113/unknown [Glycine max]
Glyma19g41040	3.16	9.02	1.5132	gi|255645771|gb|ACU23378.1|/1.04652e-108/unknown [Glycine max]		Glyma04g36140	39.44	17.88	-1.14131	gi|255627945|gb|ACU14317.1|/5.55713e-72/unknown [Glycine max]		Glyma12g20830	4	13.24	1.72683	gi|255631412|gb|ACU16073.1|/3.83168e-50/unknown [Glycine max]		Glyma05g35940	63.42	11.67	-2.44213	gi|255631121|gb|ACU15926.1|/4.0253e-62/unknown [Glycine max]		Glyma14g10660	180.31	472.57	1.39005	gi|255628515|gb|ACU14602.1|/2.3424e-20/unknown [Glycine max]		Glyma14g24030	11.64	4.18	-1.47752	gi|255644789|gb|ACU22896.1|/1.60516e-127/unknown [Glycine max]		Glyma18g29500	3.87	14.64	1.91951	gi|255648164|gb|ACU24536.1|/4.30347e-94/unknown [Glycine max]		Glyma11g06970	10.2	4.23	-1.26984	gi|255636485|gb|ACU18581.1|/5.56426e-108/unknown [Glycine max]
Glyma13g33890	4.73	13.37	1.49909	gi|255645137|gb|ACU23067.1|/3.39327e-161/unknown [Glycine max]		Glyma13g40390	21.74	9.86	-1.14069	gi|255645175|gb|ACU23085.1|/1.84065e-107/unknown [Glycine max]		Glyma01g29950	7.27	24.03	1.72481	gi|255635147|gb|ACU17930.1|/2.84489e-109/unknown [Glycine max]		Glyma08g12440	5.81	1.04	-2.48195	gi|255646431|gb|ACU23694.1|/1.15222e-94/unknown [Glycine max]		Glyma14g13770	7.46	19.52	1.38771	gi|116831533|gb|ABK28719.1|/7.5401e-07/unknown [Arabidopsis thaliana]		Glyma13g25580	18.92	6.8	-1.47631	gi|255626717|gb|ACU13703.1|/3.78534e-110/unknown [Glycine max]		Glyma06g45850	23.05	87.16	1.9189	gi|255635730|gb|ACU18214.1|/6.78972e-135/unknown [Glycine max]		Glyma02g06820	13.2	5.47	-1.27093	gi|255627885|gb|ACU14287.1|/4.96655e-85/unknown [Glycine max]
Glyma13g39600	4.91	13.87	1.49817	gi|255646157|gb|ACU23564.1|/0/unknown [Glycine max]		Glyma13g36930	97.12	44.11	-1.13866	gi|255633364|gb|ACU17039.1|/4.39668e-121/unknown [Glycine max]		Glyma11g07510	4.54	14.98	1.72227	gi|255638858|gb|ACU19732.1|/3.49812e-170/unknown [Glycine max]		Glyma09g01440	101.4	18.11	-2.4852	gi|255644902|gb|ACU22951.1|/0/unknown [Glycine max]		Glyma02g15520	41.85	109.47	1.38724	gi|255632876|gb|ACU16791.1|/1.2426e-86/unknown [Glycine max]		Glyma19g30110	160.29	57.7	-1.47404	gi|255639861|gb|ACU20223.1|/3.44985e-124/unknown [Glycine max]		Glyma03g41120	6.86	25.94	1.9189	gi|255634656|gb|ACU17690.1|/9.97334e-160/unknown [Glycine max]		Glyma11g14850	13.2	5.47	-1.27093	gi|255639759|gb|ACU20173.1|/1.12315e-120/unknown [Glycine max]
Glyma13g27460	32.25	90.89	1.49482	gi|255647793|gb|ACU24357.1|/5.88556e-60/unknown [Glycine max]		Glyma08g22130	15.78	7.18	-1.13604	gi|255647620|gb|ACU24273.1|/1.75443e-163/unknown [Glycine max]		Glyma08g47040	4.91	16.2	1.7222	gi|255648379|gb|ACU24640.1|/6.49861e-71/unknown [Glycine max]		Glyma11g15060	17.63	3.13	-2.4938	gi|255626827|gb|ACU13758.1|/2.04078e-46/unknown [Glycine max]		Glyma20g35430	12.37	32.25	1.38245	gi|255633524|gb|ACU17120.1|/1.42351e-94/unknown [Glycine max]		Glyma10g29130	21.29	7.67	-1.47288	gi|255639812|gb|ACU20199.1|/8.89834e-144/unknown [Glycine max]		Glyma07g03410	3.69	13.94	1.91754	gi|255640356|gb|ACU20466.1|/1.30003e-113/unknown [Glycine max]		Glyma01g24900	11.08	4.59	-1.27139	gi|255627811|gb|ACU14250.1|/1.1869e-72/unknown [Glycine max]
Glyma15g12100	3.68	10.36	1.49325	gi|255641490|gb|ACU21020.1|/0/unknown [Glycine max]		Glyma09g41780	27.52	12.53	-1.13509	gi|255647385|gb|ACU24158.1|/1.94068e-69/unknown [Glycine max]		Glyma16g25860	386.32	1272.94	1.7203	gi|255634951|gb|ACU17834.1|/6.27279e-164/unknown [Glycine max]		Glyma01g03010	4.91	0.87	-2.49664	gi|217074834|gb|ACJ85777.1|/1.38037e-28/unknown [Medicago truncatula]		Glyma05g28730	61.5	160.2	1.38122	gi|194466185|gb|ACF74323.1|/2.46533e-60/unknown [Arachis hypogaea]		Glyma15g05170	57.49	20.74	-1.4709	gi|255636134|gb|ACU18410.1|/5.96537e-38/unknown [Glycine max]		Glyma20g02940	11.96	45.17	1.91715	gi|255636077|gb|ACU18383.1|/4.5884e-154/unknown [Glycine max]		Glyma10g06990	11.08	4.59	-1.27139	gi|255646513|gb|ACU23734.1|/2.43487e-111/unknown [Glycine max]
Glyma13g12090	23.49	65.99	1.4902	gi|238014838|gb|ACR38454.1|/4.43768e-25/unknown [Zea mays]		Glyma06g14010	20.16	9.19	-1.13336	gi|255633068|gb|ACU16889.1|/2.86268e-45/unknown [Glycine max]		Glyma07g16750	14.54	47.89	1.7197	gi|255626317|gb|ACU13503.1|/3.37674e-41/unknown [Glycine max]		Glyma07g39490	4.91	0.87	-2.49664	gi|124359329|gb|ABN05810.1|/1.43634e-83/Protein of unknown function DUF506, plant [Medicago truncatula]		Glyma14g06790	4.55	11.85	1.38095	gi|217074214|gb|ACJ85467.1|/3.89748e-81/unknown [Medicago truncatula]		Glyma20g02110	65.68	23.71	-1.46996	gi|255626413|gb|ACU13551.1|/6.87898e-49/unknown [Glycine max]		Glyma15g01360	2.99	11.29	1.91683	gi|255633872|gb|ACU17297.1|/9.84239e-75/unknown [Glycine max]		Glyma20g25010	11.08	4.59	-1.27139	gi|255645697|gb|ACU23342.1|/1.29529e-165/unknown [Glycine max]
Glyma16g05350	3.51	9.86	1.49012	gi|255627111|gb|ACU13900.1|/1.94441e-73/unknown [Glycine max]		Glyma04g10730	12.45	5.68	-1.13218	gi|255630190|gb|ACU15450.1|/1.69331e-48/unknown [Glycine max]		Glyma09g35620	2.54	8.36	1.71867	gi|255629875|gb|ACU15288.1|/1.99454e-51/unknown [Glycine max]		Glyma19g27260	21.81	3.83	-2.50957	gi|255647317|gb|ACU24125.1|/2.26918e-163/unknown [Glycine max]		Glyma11g13190	50.22	130.56	1.37838	gi|255640973|gb|ACU20766.1|/7.14054e-148/unknown [Glycine max]		Glyma01g00720	46.58	16.91	-1.46183	gi|255546211|ref|XP_002514165.1|/6.73845e-76/protein with unknown function [Ricinus communis]		Glyma02g16490	2.11	7.94	1.9119	gi|255634797|gb|ACU17759.1|/2.70866e-61/unknown [Glycine max]		Glyma05g24740	14.07	5.82	-1.27353	gi|255639401|gb|ACU19996.1|/2.77378e-95/unknown [Glycine max]
Glyma02g37710	47.68	133.82	1.48884	gi|255644528|gb|ACU22767.1|/0/unknown [Glycine max]		Glyma11g06430	42.07	19.21	-1.13093	gi|255633044|gb|ACU16877.1|/1.40286e-39/unknown [Glycine max]		Glyma09g04510	4.72	15.5	1.71541	gi|255630540|gb|ACU15628.1|/1.06737e-84/unknown [Glycine max]		Glyma06g08250	116.3	20.03	-2.53762	gi|255634977|gb|ACU17847.1|/1.37255e-131/unknown [Glycine max]		Glyma11g14310	78.78	204.65	1.37726	gi|255626103|gb|ACU13396.1|/2.46924e-87/unknown [Glycine max]		Glyma05g31580	39.85	14.47	-1.46151	gi|255630605|gb|ACU15662.1|/3.45842e-22/unknown [Glycine max]		Glyma02g45780	2.11	7.94	1.9119	gi|255639594|gb|ACU20091.1|/5.31331e-157/unknown [Glycine max]		Glyma08g07260	14.07	5.82	-1.27353	gi|217072332|gb|ACJ84526.1|/2.31957e-64/unknown [Medicago truncatula]
Glyma03g02440	9.29	26.06	1.48809	gi|255641154|gb|ACU20854.1|/1.05293e-118/unknown [Glycine max]		Glyma11g15830	17.88	8.19	-1.12641	gi|255646501|gb|ACU23728.1|/0/unknown [Glycine max]		Glyma19g06090	29.07	95.27	1.71249	gi|255634883|gb|ACU17800.1|/2.71472e-97/unknown [Glycine max]		Glyma08g01300	5.09	0.87	-2.54858	gi|217072936|gb|ACJ84828.1|/5.67214e-102/unknown [Medicago truncatula]		Glyma08g09100	5.64	14.64	1.37615	gi|255644754|gb|ACU22879.1|/0/unknown [Glycine max]		Glyma07g38980	10.92	4.01	-1.4453	gi|255647214|gb|ACU24075.1|/3.77442e-39/unknown [Glycine max]		Glyma03g34540	7.04	26.47	1.91071	gi|255633512|gb|ACU17114.1|/2.99514e-77/unknown [Glycine max]		Glyma01g04070	120.34	49.76	-1.27406	gi|255628179|gb|ACU14434.1|/1.78527e-83/unknown [Glycine max]
Glyma19g38590	5.96	16.71	1.48733	gi|255640818|gb|ACU20692.1|/2.22225e-103/unknown [Glycine max]		Glyma06g08250	22.44	10.36	-1.11505	gi|255634977|gb|ACU17847.1|/1.37255e-131/unknown [Glycine max]		Glyma04g09310	2.18	7.14	1.7116	gi|255642183|gb|ACU21356.1|/0/unknown [Glycine max]		Glyma18g12740	4.18	0.7	-2.57808	gi|217073292|gb|ACJ85005.1|/7.39774e-163/unknown [Medicago truncatula]		Glyma16g33030	74.23	192.27	1.37306	gi|255645788|gb|ACU23386.1|/3.08839e-130/unknown [Glycine max]		Glyma07g03410	21.83	8.02	-1.44464	gi|255640356|gb|ACU20466.1|/1.30003e-113/unknown [Glycine max]		Glyma19g37230	12.49	46.76	1.9045	gi|255633512|gb|ACU17114.1|/2.5486e-71/unknown [Glycine max]		Glyma18g52060	40.99	16.94	-1.27484	gi|255647702|gb|ACU24312.1|/6.40807e-176/unknown [Glycine max]
Glyma01g37560	5.96	16.71	1.48733	gi|255642147|gb|ACU21338.1|/4.22209e-123/unknown [Glycine max]		Glyma14g11240	18.41	8.52	-1.11156	gi|255627061|gb|ACU13875.1|/3.74702e-30/unknown [Glycine max]		Glyma08g27440	3.09	10.1	1.70868	gi|255627529|gb|ACU14109.1|/3.93602e-21/unknown [Glycine max]		Glyma20g32000	468.46	76.46	-2.61515	gi|255648055|gb|ACU24483.1|/4.02231e-161/unknown [Glycine max]		Glyma06g30350	6	15.51	1.37016	gi|255636226|gb|ACU18454.1|/1.6425e-158/unknown [Glycine max]		Glyma10g05100	46.94	17.26	-1.44339	gi|255635165|gb|ACU17939.1|/2.06436e-42/unknown [Glycine max]		Glyma20g03900	3.17	11.82	1.89868	gi|217071860|gb|ACJ84290.1|/1.74523e-123/unknown [Medicago truncatula]		Glyma05g28490	117	48.35	-1.27492	gi|255642128|gb|ACU21329.1|/0/unknown [Glycine max]
Glyma10g03750	5.43	15.2	1.48505	gi|255626603|gb|ACU13646.1|/1.40064e-28/unknown [Glycine max]		Glyma17g37280	174.25	80.69	-1.1107	gi|255627283|gb|ACU13986.1|/3.0628e-69/unknown [Glycine max]		Glyma14g05610	4	13.06	1.70708	gi|255634626|gb|ACU17675.1|/4.80237e-35/unknown [Glycine max]		Glyma07g08310	37.61	6.1	-2.62424	gi|255638782|gb|ACU19695.1|/4.15722e-34/unknown [Glycine max]		Glyma04g40520	10.73	27.72	1.36928	gi|255639084|gb|ACU19842.1|/4.85279e-94/unknown [Glycine max]		Glyma18g51880	18.92	6.97	-1.44068	gi|255639331|gb|ACU19963.1|/0/unknown [Glycine max]		Glyma07g00220	18.83	69.69	1.88792	gi|255640159|gb|ACU20370.1|/0/unknown [Glycine max]		Glyma17g37110	79	32.64	-1.27521	gi|255628019|gb|ACU14354.1|/2.3211e-68/unknown [Glycine max]
Glyma19g34410	11.22	31.24	1.47732	gi|255627917|gb|ACU14303.1|/1.63369e-48/unknown [Glycine max]		Glyma17g08700	20.86	9.69	-1.10617	gi|255646929|gb|ACU23934.1|/2.26819e-22/unknown [Glycine max]		Glyma16g08440	4	13.06	1.70708	gi|255626419|gb|ACU13554.1|/1.55402e-67/unknown [Glycine max]		Glyma15g38210	28.71	4.53	-2.66397	gi|255629780|gb|ACU15239.1|/2.42435e-33/unknown [Glycine max]		Glyma09g34880	26.75	68.51	1.35678	gi|255647501|gb|ACU24214.1|/1.52606e-96/unknown [Glycine max]		Glyma04g40580	80.78	29.98	-1.43	gi|255644467|gb|ACU22737.1|/0/unknown [Glycine max]		Glyma12g08060	10.73	39.7	1.88749	gi|217071104|gb|ACJ83912.1|/2.08527e-33/unknown [Medicago truncatula]		Glyma02g03680	84.27	34.76	-1.27759	gi|255628475|gb|ACU14582.1|/1.07996e-83/unknown [Glycine max]
Glyma04g08610	9.64	26.73	1.47135	gi|255638666|gb|ACU19638.1|/8.70881e-88/unknown [Glycine max]		Glyma13g25040	14.37	6.68	-1.10514	gi|255642255|gb|ACU21392.1|/3.74906e-172/unknown [Glycine max]		Glyma08g21340	4.18	13.58	1.69991	gi|255647644|gb|ACU24285.1|/0/unknown [Glycine max]		Glyma13g43800	22.35	3.48	-2.68312	gi|255630460|gb|ACU15588.1|/2.12232e-97/unknown [Glycine max]		Glyma16g27020	23.11	58.92	1.35024	gi|255647877|gb|ACU24397.1|/1.28236e-87/unknown [Glycine max]		Glyma02g46030	16.92	6.28	-1.42989	gi|255632622|gb|ACU16661.1|/5.39287e-12/unknown [Glycine max]		Glyma04g35890	3.34	12.35	1.88659	gi|255634981|gb|ACU17849.1|/2.073e-52/unknown [Glycine max]		Glyma10g33550	34.66	14.29	-1.27827	gi|217071240|gb|ACJ83980.1|/7.69685e-77/unknown [Medicago truncatula]
Glyma01g43100	13.85	38.26	1.46595	gi|255641049|gb|ACU20804.1|/0/unknown [Glycine max]		Glyma02g39540	16.83	7.85	-1.10027	gi|255646618|gb|ACU23783.1|/1.39046e-157/unknown [Glycine max]		Glyma19g27530	46.88	152.04	1.69741	gi|255635972|gb|ACU18332.1|/2.06359e-58/unknown [Glycine max]		Glyma13g07490	223.15	34.48	-2.69418	gi|255648252|gb|ACU24579.1|/1.12842e-84/unknown [Glycine max]		Glyma12g35550	149.74	381.4	1.34885	gi|255630732|gb|ACU15727.1|/2.78052e-49/unknown [Glycine max]		Glyma17g06000	35.12	13.07	-1.42603	gi|255647003|gb|ACU23970.1|/5.42628e-143/unknown [Glycine max]		Glyma13g05120	17.24	63.7	1.88553	gi|217074028|gb|ACJ85374.1|/1.29247e-133/unknown [Medicago truncatula]		Glyma12g28730	9.85	4.06	-1.27864	gi|255641011|gb|ACU20785.1|/0/unknown [Glycine max]
Glyma16g29710	23.67	65.32	1.46447	gi|255629255|gb|ACU14972.1|/2.14254e-33/unknown [Glycine max]		Glyma04g07280	47.51	22.22	-1.09637	gi|255645289|gb|ACU23141.1|/1.06757e-142/unknown [Glycine max]		Glyma14g33330	3.45	11.15	1.69238	gi|255627345|gb|ACU14017.1|/1.33869e-42/unknown [Glycine max]		Glyma18g46330	40.16	6.1	-2.71888	gi|255629121|gb|ACU14905.1|/8.47886e-38/unknown [Glycine max]		Glyma12g20180	5.82	14.82	1.34845	gi|255641326|gb|ACU20940.1|/2.10887e-121/unknown [Glycine max]		Glyma19g22310	10.73	4.01	-1.41998	gi|255648335|gb|ACU24619.1|/1.082e-83/unknown [Glycine max]		Glyma03g27570	2.46	9	1.87127	gi|255628877|gb|ACU14783.1|/1.31234e-80/unknown [Glycine max]		Glyma07g00290	12.84	5.29	-1.27931	gi|255636521|gb|ACU18599.1|/0/unknown [Glycine max]
Glyma18g08410	69.24	190.96	1.46359	gi|255626569|gb|ACU13629.1|/3.0304e-41/unknown [Glycine max]		Glyma09g34760	118.85	55.63	-1.09521	gi|255625667|gb|ACU13178.1|/8.10632e-137/unknown [Glycine max]		Glyma15g14970	6.36	20.55	1.69204	gi|255632372|gb|ACU16536.1|/1.26866e-38/unknown [Glycine max]		Glyma03g40830	28.53	4.18	-2.7709	gi|255627225|gb|ACU13957.1|/1.30801e-52/unknown [Glycine max]		Glyma11g07740	4.73	12.03	1.34672	gi|255642147|gb|ACU21338.1|/7.55779e-110/unknown [Glycine max]		Glyma15g01020	11.64	4.36	-1.41669	gi|255632396|gb|ACU16548.1|/9.0201e-117/unknown [Glycine max]		Glyma17g13110	4.4	16.06	1.8679	gi|255633015|gb|ACU16862.1|/1.13727e-44/unknown [Glycine max]		Glyma13g37030	12.84	5.29	-1.27931	gi|255647255|gb|ACU24095.1|/2.00788e-101/unknown [Glycine max]
Glyma05g28650	6.49	17.88	1.46206	gi|255633080|gb|ACU16895.1|/2.0673e-90/unknown [Glycine max]		Glyma18g52310	20.33	9.52	-1.09458	gi|255633118|gb|ACU16914.1|/3.6691e-63/unknown [Glycine max]		Glyma09g21020	2.91	9.4	1.69164	gi|118481079|gb|ABK92493.1|/3.67295e-128/unknown [Populus trichocarpa]		Glyma10g05100	54.7	8.01	-2.77167	gi|255635165|gb|ACU17939.1|/2.06436e-42/unknown [Glycine max]		Glyma13g40390	4.73	12.03	1.34672	gi|255645175|gb|ACU23085.1|/1.84065e-107/unknown [Glycine max]		Glyma18g52980	16.74	6.28	-1.41446	gi|255646496|gb|ACU23726.1|/7.46764e-95/unknown [Glycine max]		Glyma08g43080	6.69	24.35	1.86384	gi|255645614|gb|ACU23301.1|/0/unknown [Glycine max]		Glyma02g36820	597.13	245.96	-1.27962	gi|255625911|gb|ACU13300.1|/1.0308e-55/unknown [Glycine max]
Glyma07g38980	7.36	20.22	1.45801	gi|255647214|gb|ACU24075.1|/3.77442e-39/unknown [Glycine max]		Glyma08g13320	32.08	15.04	-1.09287	gi|255635977|gb|ACU18334.1|/0/unknown [Glycine max]		Glyma06g23570	4.91	15.85	1.69069	gi|255641642|gb|ACU21093.1|/7.11164e-96/unknown [Glycine max]		Glyma19g43920	44.52	6.44	-2.78932	gi|255646494|gb|ACU23725.1|/9.312e-172/unknown [Glycine max]		Glyma19g29460	13.83	35.04	1.3412	gi|255627573|gb|ACU14131.1|/2.76027e-120/unknown [Glycine max]		Glyma12g01850	9.28	3.49	-1.4109	gi|255637310|gb|ACU18985.1|/1.10248e-133/unknown [Glycine max]		Glyma05g14300	12.49	45.35	1.86033	gi|255647408|gb|ACU24169.1|/7.86376e-92/unknown [Glycine max]		Glyma12g20180	14.6	6	-1.28293	gi|255641326|gb|ACU20940.1|/2.10887e-121/unknown [Glycine max]
Glyma11g31840	18.23	49.95	1.45417	gi|255641507|gb|ACU21028.1|/3.00548e-60/unknown [Glycine max]		Glyma20g21250	50.84	23.89	-1.08956	gi|255628071|gb|ACU14380.1|/1.45295e-37/unknown [Glycine max]		Glyma05g26370	2.54	8.19	1.68903	gi|255642329|gb|ACU21429.1|/6.00145e-167/unknown [Glycine max]		Glyma17g13820	40.16	5.75	-2.80413	gi|255630988|gb|ACU15858.1|/4.28498e-43/unknown [Glycine max]		Glyma08g11840	10.55	26.67	1.33797	gi|255625793|gb|ACU13241.1|/1.39903e-100/unknown [Glycine max]		Glyma10g44160	9.28	3.49	-1.4109	gi|255647072|gb|ACU24004.1|/1.48173e-162/unknown [Glycine max]		Glyma10g37440	15.83	57.34	1.85688	gi|255639673|gb|ACU20130.1|/0/unknown [Glycine max]		Glyma13g36560	50.67	20.82	-1.28316	gi|255635510|gb|ACU18106.1|/0/unknown [Glycine max]
Glyma08g24950	10.17	27.73	1.44713	gi|217073079|gb|ACJ84899.1|/8.09225e-109/unknown [Medicago truncatula]		Glyma03g38710	25.94	12.2	-1.0883	gi|255628093|gb|ACU14391.1|/2.00888e-09/unknown [Glycine max]		Glyma16g02350	8.54	27.52	1.68817	gi|255626119|gb|ACU13404.1|/1.23108e-84/unknown [Glycine max]		Glyma09g04990	7.27	1.04	-2.80537	gi|255635692|gb|ACU18195.1|/4.99599e-115/unknown [Glycine max]		Glyma12g09170	4	10.11	1.33771	gi|255626819|gb|ACU13754.1|/7.90579e-32/unknown [Glycine max]		Glyma14g38170	854.05	321.44	-1.40977	gi|255645829|gb|ACU23405.1|/0/unknown [Glycine max]		Glyma02g01420	2.29	8.29	1.85602	gi|255640291|gb|ACU20435.1|/3.97322e-149/unknown [Glycine max]		Glyma16g01330	29.21	12	-1.28343	gi|255641479|gb|ACU21015.1|/3.90584e-114/unknown [Glycine max]
Glyma13g27960	3.68	10.02	1.4451	gi|255646580|gb|ACU23764.1|/1.02547e-122/unknown [Glycine max]		Glyma03g37730	15.25	7.18	-1.08675	gi|255641244|gb|ACU20899.1|/8.98432e-72/unknown [Glycine max]		Glyma17g14930	21.62	69.49	1.68444	gi|255630522|gb|ACU15619.1|/1.33954e-42/unknown [Glycine max]		Glyma04g08190	63.42	9.06	-2.80735	gi|255634977|gb|ACU17847.1|/3.81198e-126/unknown [Glycine max]		Glyma04g40620	13.46	33.99	1.33643	gi|255640700|gb|ACU20634.1|/5.09077e-81/unknown [Glycine max]		Glyma16g33890	18.01	6.8	-1.40519	gi|255638670|gb|ACU19640.1|/1.34146e-155/unknown [Glycine max]		Glyma02g39710	6.69	24.17	1.85314	gi|255636552|gb|ACU18614.1|/0/unknown [Glycine max]		Glyma04g02000	46.45	19.06	-1.28513	gi|255641632|gb|ACU21088.1|/1.08651e-162/unknown [Glycine max]
Glyma12g31300	18.06	49.12	1.44351	gi|255638796|gb|ACU19702.1|/5.3957e-173/unknown [Glycine max]		Glyma06g10580	82.74	39.09	-1.08179	gi|255630190|gb|ACU15450.1|/3.31415e-70/unknown [Glycine max]		Glyma12g01810	6.36	20.38	1.68006	gi|255632470|gb|ACU16585.1|/1.22269e-60/unknown [Glycine max]		Glyma02g00290	4.91	0.7	-2.8103	gi|255640552|gb|ACU20561.1|/2.01398e-80/unknown [Glycine max]		Glyma09g02680	294.39	740.66	1.33108	gi|255642477|gb|ACU21502.1|/1.19835e-171/unknown [Glycine max]		Glyma04g36140	101.89	38.52	-1.40333	gi|255627945|gb|ACU14317.1|/5.55713e-72/unknown [Glycine max]		Glyma01g37560	3.52	12.7	1.85118	gi|255642147|gb|ACU21338.1|/4.22209e-123/unknown [Glycine max]		Glyma17g07780	11.61	4.76	-1.28633	gi|255630913|gb|ACU15819.1|/2.39584e-85/unknown [Glycine max]
Glyma10g28800	3.51	9.52	1.43949	gi|255641877|gb|ACU21207.1|/0/unknown [Glycine max]		Glyma20g23310	49.43	23.39	-1.0795	gi|255645547|gb|ACU23268.1|/0/unknown [Glycine max]		Glyma15g41170	9.09	29.08	1.67768	gi|255645309|gb|ACU23151.1|/6.80959e-120/unknown [Glycine max]		Glyma20g26730	4.91	0.7	-2.8103	gi|255632548|gb|ACU16624.1|/4.82156e-40/unknown [Glycine max]		Glyma13g34920	77.33	194.01	1.32703	gi|255630732|gb|ACU15727.1|/2.16766e-60/unknown [Glycine max]		Glyma13g17140	9.64	3.66	-1.39719	gi|255628703|gb|ACU14696.1|/1.03057e-105/unknown [Glycine max]		Glyma16g17680	5.63	20.29	1.84956	gi|255640050|gb|ACU20316.1|/1.78535e-101/unknown [Glycine max]		Glyma12g03250	16.36	6.7	-1.28794	gi|255629089|gb|ACU14889.1|/1.12132e-97/unknown [Glycine max]
Glyma09g30380	4.56	12.36	1.43857	gi|255633088|gb|ACU16899.1|/1.83829e-31/unknown [Glycine max]		Glyma14g10660	249.8	118.45	-1.0765	gi|255628515|gb|ACU14602.1|/2.3424e-20/unknown [Glycine max]		Glyma07g14830	5.45	17.42	1.67642	gi|255635684|gb|ACU18191.1|/0/unknown [Glycine max]		Glyma01g41290	113.57	16.02	-2.82564	gi|255628225|gb|ACU14457.1|/1.25257e-89/unknown [Glycine max]		Glyma02g08950	60.59	152	1.32692	gi|255637551|gb|ACU19102.1|/3.33356e-142/unknown [Glycine max]		Glyma02g08700	22.93	8.72	-1.39484	gi|255647757|gb|ACU24339.1|/1.50895e-165/unknown [Glycine max]		Glyma17g11000	2.99	10.76	1.84746	gi|255629221|gb|ACU14955.1|/1.65298e-103/unknown [Glycine max]		Glyma05g34960	33.6	13.76	-1.28798	gi|255642012|gb|ACU21273.1|/5.69101e-114/unknown [Glycine max]
Glyma01g42490	5.26	14.2	1.43276	gi|255641344|gb|ACU20949.1|/6.60239e-139/unknown [Glycine max]		Glyma06g14100	40.14	19.05	-1.07525	gi|255630129|gb|ACU15418.1|/1.03052e-13/unknown [Glycine max]		Glyma14g06820	25.26	80.64	1.67464	gi|255626245|gb|ACU13467.1|/2.55963e-60/unknown [Glycine max]		Glyma01g32760	8.72	1.22	-2.83745	gi|255626079|gb|ACU13384.1|/5.83441e-68/unknown [Glycine max]		Glyma03g26740	7.1	17.78	1.32436	gi|255626655|gb|ACU13672.1|/3.7923e-114/unknown [Glycine max]		Glyma17g05690	29.29	11.16	-1.39207	gi|255632800|gb|ACU16753.1|/1.63491e-96/unknown [Glycine max]		Glyma20g27390	2.81	10.06	1.83999	gi|255635530|gb|ACU18116.1|/5.93167e-48/unknown [Glycine max]		Glyma20g31170	17.24	7.06	-1.28802	gi|255638293|gb|ACU19459.1|/6.515e-141/unknown [Glycine max]
Glyma06g45910	280.13	755.48	1.4313	gi|255641447|gb|ACU20999.1|/1.99987e-174/unknown [Glycine max]		Glyma06g07800	58.72	27.9	-1.07359	gi|255635979|gb|ACU18335.1|/0/unknown [Glycine max]		Glyma08g00640	15.63	49.81	1.67212	gi|255628871|gb|ACU14780.1|/1.60719e-34/unknown [Glycine max]		Glyma15g38220	69.41	9.58	-2.85705	gi|255628191|gb|ACU14440.1|/9.64101e-33/unknown [Glycine max]		Glyma09g38270	5.64	14.12	1.32397	gi|255646272|gb|ACU23620.1|/0/unknown [Glycine max]		Glyma07g04530	12.74	4.88	-1.38441	gi|255631426|gb|ACU16080.1|/8.45732e-88/unknown [Glycine max]		Glyma02g15130	58.06	207.85	1.83993	gi|217072288|gb|ACJ84504.1|/7.35247e-116/unknown [Medicago truncatula]		Glyma12g04880	13.37	5.47	-1.28939	gi|255632458|gb|ACU16579.1|/2.11834e-111/unknown [Glycine max]
Glyma03g35870	5.08	13.7	1.43128	gi|255626383|gb|ACU13536.1|/1.04602e-78/unknown [Glycine max]		Glyma08g27070	359.71	171.25	-1.07073	gi|255637306|gb|ACU18983.1|/0/unknown [Glycine max]		Glyma13g37720	2.91	9.23	1.66531	gi|255626567|gb|ACU13628.1|/2.57685e-35/unknown [Glycine max]		Glyma13g40900	68.32	9.4	-2.86158	gi|255626369|gb|ACU13529.1|/1.01832e-43/unknown [Glycine max]		Glyma02g11750	6.55	16.39	1.32325	gi|255631280|gb|ACU16007.1|/2.24854e-91/unknown [Glycine max]		Glyma03g05480	29.11	11.16	-1.38318	gi|255637984|gb|ACU19308.1|/1.69597e-44/unknown [Glycine max]		Glyma13g34990	19.35	69.17	1.83781	gi|255636178|gb|ACU18431.1|/9.32804e-117/unknown [Glycine max]		Glyma11g13300	36.24	14.82	-1.29004	gi|255639265|gb|ACU19931.1|/3.11717e-172/unknown [Glycine max]
Glyma03g03310	5.96	16.04	1.42829	gi|255637117|gb|ACU18890.1|/0/unknown [Glycine max]		Glyma15g15140	18.93	9.02	-1.06948	gi|255626981|gb|ACU13835.1|/1.14912e-40/unknown [Glycine max]		Glyma17g09580	2.91	9.23	1.66531	gi|217073316|gb|ACJ85017.1|/3.28079e-88/unknown [Medicago truncatula]		Glyma02g35210	11.45	1.57	-2.86651	gi|255638894|gb|ACU19749.1|/1.75121e-121/unknown [Glycine max]		Glyma18g19760	55.68	138.93	1.31913	gi|255630228|gb|ACU15469.1|/3.08841e-12/unknown [Glycine max]		Glyma10g31810	29.11	11.16	-1.38318	gi|255636939|gb|ACU18802.1|/9.53915e-106/unknown [Glycine max]		Glyma07g00830	3.17	11.29	1.83249	gi|255634718|gb|ACU17721.1|/1.59705e-83/unknown [Glycine max]		Glyma04g35040	24.63	10.06	-1.29179	gi|255639025|gb|ACU19813.1|/2.17706e-107/unknown [Glycine max]
Glyma18g52410	15.78	42.44	1.42733	gi|255630149|gb|ACU15428.1|/3.19622e-78/unknown [Glycine max]		Glyma15g04280	17.88	8.52	-1.06942	gi|255647315|gb|ACU24124.1|/0/unknown [Glycine max]		Glyma03g40870	4.36	13.76	1.65808	gi|255637828|gb|ACU19234.1|/4.25874e-161/unknown [Glycine max]		Glyma08g45490	6.54	0.87	-2.9102	gi|255625877|gb|ACU13283.1|/1.42264e-104/unknown [Glycine max]		Glyma16g27220	38.94	96.74	1.31286	gi|255647696|gb|ACU24309.1|/0/unknown [Glycine max]		Glyma05g38220	9.1	3.49	-1.38264	gi|255636041|gb|ACU18365.1|/8.74176e-98/unknown [Glycine max]		Glyma08g47470	3.87	13.76	1.83007	gi|255629833|gb|ACU15267.1|/2.39202e-112/unknown [Glycine max]		Glyma03g02490	25.51	10.41	-1.29309	gi|255632620|gb|ACU16660.1|/1.96677e-58/unknown [Glycine max]
Glyma18g05580	13.67	36.76	1.42712	gi|255632916|gb|ACU16812.1|/1.27038e-54/unknown [Glycine max]		Glyma02g13930	53.82	25.73	-1.06469	gi|255637939|gb|ACU19286.1|/2.02476e-51/unknown [Glycine max]		Glyma06g14500	3.09	9.75	1.6578	gi|217071708|gb|ACJ84214.1|/0/unknown [Medicago truncatula]		Glyma06g14330	40.89	5.4	-2.92072	gi|255645127|gb|ACU23062.1|/1.19204e-104/unknown [Glycine max]		Glyma16g34840	78.24	194.36	1.31275	gi|255638163|gb|ACU19395.1|/2.22248e-116/unknown [Glycine max]		Glyma18g08410	366.26	140.67	-1.38055	gi|255626569|gb|ACU13629.1|/3.0304e-41/unknown [Glycine max]		Glyma13g34220	13.9	49.4	1.82943	gi|255626275|gb|ACU13482.1|/2.22613e-37/unknown [Glycine max]		Glyma02g13670	11.26	4.59	-1.29464	gi|255635096|gb|ACU17906.1|/0/unknown [Glycine max]
Glyma12g23150	8.59	23.06	1.42466	gi|255642311|gb|ACU21420.1|/1.95669e-128/unknown [Glycine max]		Glyma10g40870	83.44	39.93	-1.06327	gi|255646515|gb|ACU23735.1|/1.00942e-126/unknown [Glycine max]		Glyma08g06010	16.9	53.29	1.65684	gi|255646412|gb|ACU23685.1|/0/unknown [Glycine max]		Glyma06g14290	118.84	15.67	-2.92294	gi|255646322|gb|ACU23644.1|/0/unknown [Glycine max]		Glyma05g01360	49.13	122.02	1.31244	gi|255644900|gb|ACU22950.1|/4.95337e-142/unknown [Glycine max]		Glyma05g36040	27.66	10.63	-1.37966	gi|217075747|gb|ACJ86233.1|/0/unknown [Medicago truncatula]		Glyma09g04150	29.03	103.04	1.82759	gi|255631075|gb|ACU15902.1|/2.02079e-37/unknown [Glycine max]		Glyma20g36740	137.23	55.93	-1.2949	gi|255638648|gb|ACU19629.1|/0/unknown [Glycine max]
Glyma08g01870	3.86	10.36	1.42435	gi|255645841|gb|ACU23411.1|/7.15732e-160/unknown [Glycine max]		Glyma19g27260	56.1	26.9	-1.06039	gi|255647317|gb|ACU24125.1|/2.26918e-163/unknown [Glycine max]		Glyma02g46970	10.36	32.57	1.65252	gi|255630623|gb|ACU15671.1|/6.35867e-63/unknown [Glycine max]		Glyma08g21390	9.27	1.22	-2.92569	gi|255641005|gb|ACU20782.1|/1.17841e-131/unknown [Glycine max]		Glyma12g29510	222.16	551.36	1.3114	gi|255637600|gb|ACU19125.1|/8.77016e-140/unknown [Glycine max]		Glyma19g05720	14.92	5.75	-1.37561	gi|255646457|gb|ACU23707.1|/7.1013e-160/unknown [Glycine max]		Glyma05g01330	1.94	6.88	1.82635	gi|255631868|gb|ACU16301.1|/1.29985e-114/unknown [Glycine max]		Glyma15g10750	10.38	4.23	-1.29508	gi|255625913|gb|ACU13301.1|/2.41286e-80/unknown [Glycine max]
Glyma17g06090	49.08	131.65	1.4235	gi|255647948|gb|ACU24431.1|/7.80913e-161/unknown [Glycine max]		Glyma02g01250	20.51	9.86	-1.05667	gi|255629005|gb|ACU14847.1|/5.74186e-35/unknown [Glycine max]		Glyma13g41610	3.27	10.28	1.65248	gi|255629201|gb|ACU14945.1|/1.2376e-65/unknown [Glycine max]		Glyma07g20070	4	0.52	-2.94342	gi|255642110|gb|ACU21321.1|/0/unknown [Glycine max]		Glyma05g28190	7.1	17.61	1.3105	gi|255628715|gb|ACU14702.1|/3.02338e-49/unknown [Glycine max]		Glyma15g08160	12.19	4.71	-1.3719	gi|255626481|gb|ACU13585.1|/9.96265e-101/unknown [Glycine max]		Glyma07g03480	2.29	8.12	1.82613	gi|255626109|gb|ACU13399.1|/3.42839e-60/unknown [Glycine max]		Glyma19g30550	57.18	23.29	-1.2958	gi|255628877|gb|ACU14783.1|/5.21466e-77/unknown [Glycine max]
Glyma20g35440	8.24	22.05	1.42006	gi|255629986|gb|ACU15345.1|/3.70609e-79/unknown [Glycine max]		Glyma08g02180	18.06	8.69	-1.05537	gi|255639549|gb|ACU20069.1|/0/unknown [Glycine max]		Glyma04g40810	367.97	1144.93	1.6376	gi|255625869|gb|ACU13279.1|/5.13521e-11/unknown [Glycine max]		Glyma10g30570	4	0.52	-2.94342	gi|255636176|gb|ACU18430.1|/2.26541e-162/unknown [Glycine max]		Glyma19g01300	184.31	457.05	1.31022	gi|255635463|gb|ACU18084.1|/6.68882e-154/unknown [Glycine max]		Glyma14g21160	12.19	4.71	-1.3719	gi|255636576|gb|ACU18626.1|/4.18666e-61/unknown [Glycine max]		Glyma15g42680	2.99	10.59	1.82449	gi|255647793|gb|ACU24357.1|/2.45378e-80/unknown [Glycine max]		Glyma05g36700	36.95	15	-1.30061	gi|255637142|gb|ACU18902.1|/1.64203e-103/unknown [Glycine max]
Glyma04g09500	28.05	75.01	1.41908	gi|255627527|gb|ACU14108.1|/5.3881e-102/unknown [Glycine max]		Glyma15g15910	88.35	42.6	-1.05238	gi|255625733|gb|ACU13211.1|/3.90582e-79/unknown [Glycine max]		Glyma18g38010	7.45	23.16	1.63632	gi|255648379|gb|ACU24640.1|/6.02775e-101/unknown [Glycine max]		Glyma13g19220	4	0.52	-2.94342	gi|255646382|gb|ACU23670.1|/0/unknown [Glycine max]		Glyma08g11040	251.45	623.18	1.30938	gi|255633110|gb|ACU16910.1|/1.42188e-14/unknown [Glycine max]		Glyma06g15490	12.19	4.71	-1.3719	gi|255634004|gb|ACU17364.1|/1.1546e-94/unknown [Glycine max]		Glyma19g06470	8.97	31.76	1.82403	gi|255648281|gb|ACU24593.1|/0/unknown [Glycine max]		Glyma03g28760	434.74	176.27	-1.30237	gi|255637692|gb|ACU19169.1|/1.58418e-51/unknown [Glycine max]
Glyma07g16420	44	117.62	1.41856	gi|255627827|gb|ACU14258.1|/5.20886e-33/unknown [Glycine max]		Glyma02g14040	14.2	6.85	-1.05172	gi|255635125|gb|ACU17919.1|/1.52305e-170/unknown [Glycine max]		Glyma06g13590	2.54	7.84	1.62603	gi|255633426|gb|ACU17071.1|/1.31667e-84/unknown [Glycine max]		Glyma07g04860	5.45	0.7	-2.96083	gi|255647557|gb|ACU24242.1|/1.03557e-87/unknown [Glycine max]		Glyma20g31580	8.73	21.62	1.30831	gi|255645600|gb|ACU23294.1|/4.67075e-110/unknown [Glycine max]		Glyma18g50150	9.46	3.66	-1.37	gi|255645506|gb|ACU23248.1|/8.0221e-91/unknown [Glycine max]		Glyma16g01110	10.38	36.7	1.82197	gi|255631426|gb|ACU16080.1|/3.08445e-79/unknown [Glycine max]		Glyma02g11730	18.3	7.41	-1.3043	gi|255640687|gb|ACU20628.1|/7.5534e-120/unknown [Glycine max]
Glyma06g48350	10.34	27.57	1.41486	gi|255632920|gb|ACU16814.1|/4.22018e-48/unknown [Glycine max]		Glyma20g25950	49.43	23.89	-1.04898	gi|255647854|gb|ACU24386.1|/4.0419e-22/unknown [Glycine max]		Glyma11g13190	10.9	33.61	1.62456	gi|255640973|gb|ACU20766.1|/7.14054e-148/unknown [Glycine max]		Glyma10g05190	9.63	1.22	-2.98065	gi|255639717|gb|ACU20152.1|/2.53818e-36/unknown [Glycine max]		Glyma06g15540	19.29	47.76	1.30795	gi|255627347|gb|ACU14018.1|/1.93048e-64/unknown [Glycine max]		Glyma19g28420	22.02	8.54	-1.36651	gi|255647700|gb|ACU24311.1|/3.28184e-78/unknown [Glycine max]		Glyma16g16060	4.57	16.06	1.81321	gi|255642047|gb|ACU21290.1|/3.30502e-108/unknown [Glycine max]		Glyma12g07610	37.47	15.17	-1.30451	gi|255631016|gb|ACU15872.1|/6.02596e-47/unknown [Glycine max]
Glyma09g06000	11.04	29.4	1.41308	gi|255638120|gb|ACU19374.1|/1.04295e-101/unknown [Glycine max]		Glyma12g04850	22.79	11.03	-1.04697	gi|255647798|gb|ACU24359.1|/1.42803e-40/unknown [Glycine max]		Glyma02g13060	6.72	20.55	1.61261	gi|255632139|gb|ACU16422.1|/1.31399e-53/unknown [Glycine max]		Glyma09g02600	49.24	6.1	-3.01295	gi|255637517|gb|ACU19085.1|/0/unknown [Glycine max]		Glyma02g07560	19.65	48.63	1.30732	gi|255638821|gb|ACU19714.1|/0/unknown [Glycine max]		Glyma17g31060	21.11	8.19	-1.36599	gi|255631718|gb|ACU16226.1|/8.09639e-84/unknown [Glycine max]		Glyma11g17980	4.22	14.82	1.81223	gi|255648024|gb|ACU24468.1|/2.46453e-91/unknown [Glycine max]		Glyma13g04720	103.8	41.99	-1.30569	gi|255640574|gb|ACU20572.1|/3.47318e-43/unknown [Glycine max]
Glyma01g24650	8.06	21.38	1.40741	gi|255636959|gb|ACU18812.1|/0/unknown [Glycine max]		Glyma12g25500	21.39	10.36	-1.04591	gi|255626621|gb|ACU13655.1|/9.58385e-97/unknown [Glycine max]		Glyma11g21640	74.87	227.63	1.60423	gi|255646813|gb|ACU23878.1|/6.95413e-07/unknown [Glycine max]		Glyma17g05760	243.68	30.13	-3.01572	gi|255637243|gb|ACU18952.1|/7.89487e-88/unknown [Glycine max]		Glyma07g32960	12.19	30.16	1.30694	gi|255637424|gb|ACU19040.1|/8.58697e-78/unknown [Glycine max]		Glyma01g00930	9.83	3.83	-1.35985	gi|255628247|gb|ACU14468.1|/3.81136e-82/unknown [Glycine max]		Glyma06g38130	1.76	6.18	1.81203	gi|255647088|gb|ACU24012.1|/3.41673e-27/unknown [Glycine max]		Glyma01g36890	85.5	34.58	-1.30599	gi|255641607|gb|ACU21076.1|/0/unknown [Glycine max]
Glyma15g01220	52.41	138.5	1.40197	gi|255626337|gb|ACU13513.1|/7.4838e-99/unknown [Glycine max]		Glyma16g33270	28.57	13.87	-1.04253	gi|255647032|gb|ACU23984.1|/8.26223e-149/unknown [Glycine max]		Glyma08g13470	2.54	7.66	1.59252	gi|255626279|gb|ACU13484.1|/8.91028e-96/unknown [Glycine max]		Glyma06g06450	11.27	1.39	-3.01933	gi|255633594|gb|ACU17156.1|/4.27124e-91/unknown [Glycine max]		Glyma19g01860	4.37	10.81	1.30666	gi|255625859|gb|ACU13274.1|/1.86663e-55/unknown [Glycine max]		Glyma20g18290	54.04	21.09	-1.35747	gi|255626265|gb|ACU13477.1|/4.24516e-114/unknown [Glycine max]		Glyma08g13440	1.76	6.18	1.81203	gi|255645488|gb|ACU23239.1|/8.09737e-162/unknown [Glycine max]		Glyma16g27130	10.91	4.41	-1.3068	gi|255645287|gb|ACU23140.1|/1.87926e-154/unknown [Glycine max]
Glyma17g12480	5.26	13.87	1.39883	gi|255626563|gb|ACU13626.1|/1.23595e-70/unknown [Glycine max]		Glyma04g43300	17.88	8.69	-1.04092	gi|255629001|gb|ACU14845.1|/6.84776e-60/unknown [Glycine max]		Glyma03g41120	7.27	21.77	1.58231	gi|255634656|gb|ACU17690.1|/9.97334e-160/unknown [Glycine max]		Glyma13g07590	17.08	2.09	-3.03073	gi|118481089|gb|ABK92498.1|/2.17218e-92/unknown [Populus trichocarpa]		Glyma16g01490	4.37	10.81	1.30666	gi|255648295|gb|ACU24600.1|/0/unknown [Glycine max]		Glyma13g01140	56.22	21.96	-1.35621	gi|255641964|gb|ACU21249.1|/1.11503e-157/unknown [Glycine max]		Glyma19g41760	7.04	24.7	1.81086	gi|255633060|gb|ACU16885.1|/9.53532e-92/unknown [Glycine max]		Glyma02g04200	12.67	5.12	-1.3072	gi|255638241|gb|ACU19434.1|/9.1727e-131/unknown [Glycine max]
Glyma07g00970	6.66	17.54	1.39705	gi|217074730|gb|ACJ85725.1|/0/unknown [Medicago truncatula]		Glyma17g08630	90.8	44.27	-1.03636	gi|255645259|gb|ACU23127.1|/4.98852e-63/unknown [Glycine max]		Glyma15g03790	2.91	8.71	1.58165	gi|255629201|gb|ACU14945.1|/2.57939e-58/unknown [Glycine max]		Glyma17g34040	5.81	0.7	-3.05311	gi|255626605|gb|ACU13647.1|/1.75753e-88/unknown [Glycine max]		Glyma06g05370	4.37	10.81	1.30666	gi|255641115|gb|ACU20836.1|/8.81679e-122/unknown [Glycine max]		Glyma07g36460	22.74	8.89	-1.35498	gi|255632872|gb|ACU16789.1|/5.00749e-87/unknown [Glycine max]		Glyma11g10340	9.32	32.64	1.80824	gi|255648016|gb|ACU24464.1|/1.36704e-92/unknown [Glycine max]		Glyma14g36610	36.24	14.64	-1.30767	gi|255631622|gb|ACU16178.1|/3.61502e-99/unknown [Glycine max]
Glyma13g15790	4.73	12.36	1.38577	gi|255634708|gb|ACU17716.1|/0/unknown [Glycine max]		Glyma14g08960	44.53	21.72	-1.03575	gi|255632912|gb|ACU16810.1|/2.23698e-122/unknown [Glycine max]		Glyma08g00990	29.07	86.91	1.57999	gi|255627899|gb|ACU14294.1|/2.42712e-77/unknown [Glycine max]		Glyma18g43900	7.27	0.87	-3.06287	gi|255626493|gb|ACU13591.1|/3.74445e-108/unknown [Glycine max]		Glyma19g07220	10.73	26.5	1.30434	gi|255647374|gb|ACU24153.1|/1.0435e-119/unknown [Glycine max]		Glyma12g06960	25.84	10.11	-1.35382	gi|255627525|gb|ACU14107.1|/1.75107e-70/unknown [Glycine max]		Glyma08g22660	4.75	16.59	1.80431	gi|255646978|gb|ACU23958.1|/1.14349e-114/unknown [Glycine max]		Glyma16g08930	11.79	4.76	-1.30853	gi|255644760|gb|ACU22882.1|/0/unknown [Glycine max]
Glyma06g42070	610.39	1591.16	1.38228	gi|255627009|gb|ACU13849.1|/2.32298e-46/unknown [Glycine max]		Glyma12g01240	28.75	14.03	-1.03505	gi|255625725|gb|ACU13207.1|/1.16108e-34/unknown [Glycine max]		Glyma01g26220	4.72	14.11	1.57986	gi|255632224|gb|ACU16470.1|/4.1164e-117/unknown [Glycine max]		Glyma10g35000	8.72	1.04	-3.06774	gi|255632960|gb|ACU16834.1|/6.63009e-06/unknown [Glycine max]		Glyma14g38840	45.12	110.86	1.2969	gi|255631750|gb|ACU16242.1|/2.23886e-110/unknown [Glycine max]		Glyma05g00470	11.1	4.36	-1.34816	gi|255628989|gb|ACU14839.1|/8.01533e-44/unknown [Glycine max]		Glyma08g23510	2.99	10.41	1.79975	gi|255632854|gb|ACU16780.1|/2.46488e-34/unknown [Glycine max]		Glyma12g32680	67.38	27.17	-1.31031	gi|255636566|gb|ACU18621.1|/3.05202e-159/unknown [Glycine max]
Glyma19g02450	5.26	13.7	1.38104	gi|255641565|gb|ACU21056.1|/0/unknown [Glycine max]		Glyma18g12180	21.56	10.53	-1.03385	gi|255646513|gb|ACU23734.1|/5.79921e-119/unknown [Glycine max]		Glyma08g02590	3.63	10.8	1.57299	gi|255638027|gb|ACU19328.1|/9.65691e-103/unknown [Glycine max]		Glyma14g23910	4.36	0.52	-3.06774	gi|255641168|gb|ACU20861.1|/5.06631e-15/unknown [Glycine max]		Glyma20g26140	444.13	1089.82	1.29504	gi|255640808|gb|ACU20687.1|/3.79891e-72/unknown [Glycine max]		Glyma08g21480	10.19	4.01	-1.34548	gi|255641312|gb|ACU20933.1|/3.65183e-156/unknown [Glycine max]		Glyma17g17120	6.69	23.29	1.79963	gi|255645823|gb|ACU23402.1|/2.06058e-22/unknown [Glycine max]		Glyma04g36930	19.7	7.94	-1.31098	gi|255633028|gb|ACU16869.1|/2.49795e-80/unknown [Glycine max]
Glyma10g02430	18.41	47.78	1.37592	gi|255640785|gb|ACU20676.1|/4.54856e-32/unknown [Glycine max]		Glyma13g40960	27.35	13.37	-1.03254	gi|255641885|gb|ACU21211.1|/0/unknown [Glycine max]		Glyma09g04530	44.16	130.97	1.56842	gi|255626829|gb|ACU13759.1|/1.42788e-83/unknown [Glycine max]		Glyma08g39250	8.9	1.04	-3.09722	gi|217072622|gb|ACJ84671.1|/1.21951e-87/unknown [Medicago truncatula]		Glyma20g30380	4.55	11.16	1.2944	gi|255635084|gb|ACU17900.1|/2.86924e-171/unknown [Glycine max]		Glyma06g41610	50.94	20.05	-1.3452	gi|255628353|gb|ACU14521.1|/1.52732e-63/unknown [Glycine max]		Glyma15g41020	2.64	9.17	1.79638	gi|255645217|gb|ACU23106.1|/1.26199e-84/unknown [Glycine max]		Glyma11g10770	79.7	32.11	-1.31156	gi|255645825|gb|ACU23403.1|/0/unknown [Glycine max]
Glyma03g41120	32.96	85.54	1.37588	gi|255634656|gb|ACU17690.1|/9.97334e-160/unknown [Glycine max]		Glyma06g44510	32.78	16.04	-1.03114	gi|255636069|gb|ACU18379.1|/0/unknown [Glycine max]		Glyma02g40820	36.89	109.2	1.56567	gi|255635311|gb|ACU18009.1|/0/unknown [Glycine max]		Glyma05g37350	16.54	1.92	-3.10678	gi|255646699|gb|ACU23823.1|/2.30955e-127/unknown [Glycine max]		Glyma01g41380	50.22	123.07	1.29315	gi|255637791|gb|ACU19217.1|/2.904e-118/unknown [Glycine max]		Glyma09g41650	15.47	6.1	-1.34259	gi|255634670|gb|ACU17697.1|/0/unknown [Glycine max]		Glyma17g02990	2.64	9.17	1.79638	gi|255645815|gb|ACU23398.1|/8.45732e-54/unknown [Glycine max]		Glyma03g34420	24.1	9.7	-1.31298	gi|255637756|gb|ACU19200.1|/0/unknown [Glycine max]
Glyma20g35000	45.05	116.61	1.37209	gi|255627611|gb|ACU14150.1|/1.87931e-61/unknown [Glycine max]		Glyma12g31930	35.76	17.54	-1.0277	gi|255629700|gb|ACU15199.1|/4.27561e-84/unknown [Glycine max]		Glyma12g35820	8.18	24.21	1.56543	gi|255637978|gb|ACU19305.1|/5.71915e-146/unknown [Glycine max]		Glyma09g31640	4.54	0.52	-3.12611	gi|255637770|gb|ACU19207.1|/0/unknown [Glycine max]		Glyma06g44810	40.57	99.36	1.29225	gi|255632402|gb|ACU16551.1|/8.68388e-108/unknown [Glycine max]		Glyma14g02610	12.37	4.88	-1.34189	gi|255632420|gb|ACU16560.1|/4.90365e-118/unknown [Glycine max]		Glyma17g15190	4.22	14.64	1.7946	gi|255636588|gb|ACU18632.1|/2.23802e-177/unknown [Glycine max]		Glyma19g43920	29.38	11.82	-1.3136	gi|255646494|gb|ACU23725.1|/9.312e-172/unknown [Glycine max]
Glyma04g40580	14.73	38.09	1.37065	gi|255644467|gb|ACU22737.1|/0/unknown [Glycine max]		Glyma06g17470	40.84	20.05	-1.02638	gi|255627551|gb|ACU14120.1|/5.94887e-126/unknown [Glycine max]		Glyma13g27590	6.54	19.33	1.56348	gi|255638213|gb|ACU19420.1|/3.97359e-73/unknown [Glycine max]		Glyma11g12650	4.54	0.52	-3.12611	gi|255641923|gb|ACU21230.1|/2.41458e-111/unknown [Glycine max]		Glyma06g06420	14.01	34.17	1.28627	gi|255638592|gb|ACU19603.1|/0/unknown [Glycine max]		Glyma14g05350	51.13	20.22	-1.33839	gi|255639863|gb|ACU20224.1|/2.51941e-159/unknown [Glycine max]		Glyma12g34610	3.87	13.41	1.7929	gi|255645666|gb|ACU23327.1|/1.6602e-45/unknown [Glycine max]		Glyma06g03270	14.07	5.65	-1.3163	gi|255637091|gb|ACU18877.1|/0/unknown [Glycine max]
Glyma03g40110	22.26	57.47	1.36836	gi|255625645|gb|ACU13167.1|/5.92067e-61/unknown [Glycine max]		Glyma06g19250	21.74	10.69	-1.02409	gi|255645580|gb|ACU23284.1|/3.84307e-179/unknown [Glycine max]		Glyma05g08030	4.54	13.41	1.56255	gi|255645088|gb|ACU23043.1|/2.23887e-69/unknown [Glycine max]		Glyma03g31060	49.24	5.57	-3.14408	gi|217074300|gb|ACJ85510.1|/1.18902e-147/unknown [Medicago truncatula]		Glyma10g25480	4.73	11.5	1.28172	gi|255642395|gb|ACU21461.1|/7.3047e-95/unknown [Glycine max]		Glyma01g42660	226.89	89.95	-1.3348	gi|255639092|gb|ACU19846.1|/1.60616e-128/unknown [Glycine max]		Glyma11g37310	1.94	6.7	1.7881	gi|255630873|gb|ACU15799.1|/1.14449e-98/unknown [Glycine max]		Glyma12g35190	23.75	9.53	-1.31738	gi|255631161|gb|ACU15946.1|/5.08561e-100/unknown [Glycine max]
Glyma16g26940	63.46	163.73	1.3674	gi|255639495|gb|ACU20042.1|/0/unknown [Glycine max]		Glyma07g11950	32.25	15.87	-1.023	gi|255629946|gb|ACU15325.1|/1.27659e-58/unknown [Glycine max]		Glyma17g10990	38.89	114.42	1.55687	gi|255647180|gb|ACU24058.1|/8.4472e-144/unknown [Glycine max]		Glyma18g02400	46.88	5.22	-3.16685	gi|255628931|gb|ACU14810.1|/1.30373e-23/unknown [Glycine max]		Glyma09g38080	9.64	23.36	1.27694	gi|255634828|gb|ACU17774.1|/2.72323e-59/unknown [Glycine max]		Glyma16g31990	15.83	6.28	-1.33382	gi|255629940|gb|ACU15322.1|/1.04259e-81/unknown [Glycine max]		Glyma17g29590	1.94	6.7	1.7881	gi|255631616|gb|ACU16175.1|/7.36374e-62/unknown [Glycine max]		Glyma05g05440	42.22	16.94	-1.31749	gi|255635880|gb|ACU18287.1|/1.26678e-151/unknown [Glycine max]
Glyma06g01550	14.55	37.42	1.36279	gi|255637445|gb|ACU19050.1|/8.17701e-36/unknown [Glycine max]		Glyma04g17650	118.33	58.31	-1.021	gi|255630988|gb|ACU15858.1|/2.51432e-67/unknown [Glycine max]		Glyma07g05760	8.54	24.9	1.54384	gi|255631474|gb|ACU16104.1|/1.7724e-74/unknown [Glycine max]		Glyma07g39650	32.89	3.66	-3.16773	gi|255644902|gb|ACU22951.1|/0/unknown [Glycine max]		Glyma13g44380	56.95	137.71	1.27387	gi|255627569|gb|ACU14129.1|/2.39213e-125/unknown [Glycine max]		Glyma16g27900	87.7	34.86	-1.331	gi|255638280|gb|ACU19453.1|/3.27444e-65/unknown [Glycine max]		Glyma02g13060	3.17	10.94	1.78706	gi|255632139|gb|ACU16422.1|/1.31399e-53/unknown [Glycine max]		Glyma01g24950	30.79	12.35	-1.31795	gi|217072642|gb|ACJ84681.1|/4.0284e-147/unknown [Medicago truncatula]
Glyma06g07340	9.64	24.73	1.35916	gi|255629430|gb|ACU15061.1|/2.83163e-108/unknown [Glycine max]		Glyma08g44610	14.9	7.35	-1.0195	gi|255628455|gb|ACU14572.1|/4.01647e-112/unknown [Glycine max]		Glyma12g10810	12.17	35.35	1.53838	gi|255637282|gb|ACU18971.1|/2.07207e-59/unknown [Glycine max]		Glyma01g00930	29.8	3.31	-3.17041	gi|255628247|gb|ACU14468.1|/3.81136e-82/unknown [Glycine max]		Glyma13g21760	78.42	189.48	1.27275	gi|255641650|gb|ACU21097.1|/2.53324e-51/unknown [Glycine max]		Glyma11g36030	16.19	6.45	-1.32773	gi|255628931|gb|ACU14810.1|/6.4873e-30/unknown [Glycine max]		Glyma13g35480	5.63	19.41	1.78559	gi|255646509|gb|ACU23732.1|/4.42812e-139/unknown [Glycine max]		Glyma13g07400	25.51	10.23	-1.31826	gi|255646034|gb|ACU23504.1|/3.55135e-150/unknown [Glycine max]
Glyma04g38670	6.49	16.54	1.34967	gi|255638076|gb|ACU19352.1|/0/unknown [Glycine max]		Glyma15g11140	18.23	9.02	-1.01512	gi|255648351|gb|ACU24627.1|/4.31063e-104/unknown [Glycine max]		Glyma07g37000	7.45	21.6	1.53572	gi|255627651|gb|ACU14170.1|/6.52422e-31/unknown [Glycine max]		Glyma13g13040	11.27	1.22	-3.20753	gi|255645307|gb|ACU23150.1|/6.8199e-119/unknown [Glycine max]		Glyma05g26370	4.91	11.85	1.27109	gi|255642329|gb|ACU21429.1|/6.00145e-167/unknown [Glycine max]		Glyma19g10300	24.93	9.94	-1.32657	gi|255636483|gb|ACU18580.1|/3.3585e-94/unknown [Glycine max]		Glyma12g05080	8.09	27.88	1.78502	gi|255631376|gb|ACU16055.1|/1.99774e-61/unknown [Glycine max]		Glyma02g05080	62.11	24.88	-1.31984	gi|255645668|gb|ACU23328.1|/1.98477e-63/unknown [Glycine max]
Glyma19g06450	13.32	33.91	1.34812	gi|255625985|gb|ACU13337.1|/1.69662e-69/unknown [Glycine max]		Glyma02g41340	18.23	9.02	-1.01512	gi|255635407|gb|ACU18056.1|/0/unknown [Glycine max]		Glyma10g01690	37.07	107.28	1.53306	gi|255628807|gb|ACU14748.1|/1.15005e-88/unknown [Glycine max]		Glyma04g39370	868.23	93.52	-3.21473	gi|255626111|gb|ACU13400.1|/3.60402e-53/unknown [Glycine max]		Glyma17g12500	6	14.47	1.27003	gi|255632974|gb|ACU16841.1|/1.08994e-51/unknown [Glycine max]		Glyma09g41640	35.3	14.12	-1.32193	gi|255632669|gb|ACU16686.1|/2.95805e-46/unknown [Glycine max]		Glyma09g03500	25.86	89.1	1.7847	gi|255641517|gb|ACU21032.1|/2.48593e-163/unknown [Glycine max]		Glyma20g11270	10.56	4.23	-1.31988	gi|255634708|gb|ACU17716.1|/0/unknown [Glycine max]
Glyma09g26940	19.81	50.29	1.34404	gi|255647927|gb|ACU24421.1|/3.06235e-160/unknown [Glycine max]		Glyma07g05830	50.14	24.89	-1.0104	gi|255628943|gb|ACU14816.1|/3.43559e-76/unknown [Glycine max]		Glyma12g30800	50.33	145.42	1.53074	gi|255628041|gb|ACU14365.1|/1.48165e-14/unknown [Glycine max]		Glyma11g04130	64.87	6.97	-3.21832	gi|255628225|gb|ACU14457.1|/1.14447e-98/unknown [Glycine max]		Glyma03g02060	5.28	12.72	1.26849	gi|217071738|gb|ACJ84229.1|/3.13109e-164/unknown [Medicago truncatula]		Glyma02g46150	21.29	8.54	-1.31787	gi|255632420|gb|ACU16560.1|/1.49446e-106/unknown [Glycine max]		Glyma10g24650	4.05	13.94	1.78324	gi|255638132|gb|ACU19380.1|/1.76507e-105/unknown [Glycine max]		Glyma19g25870	37.47	15	-1.32077	gi|255637583|gb|ACU19117.1|/1.44612e-151/unknown [Glycine max]
Glyma19g35290	9.29	23.56	1.34259	gi|255628025|gb|ACU14357.1|/5.31597e-60/unknown [Glycine max]		Glyma05g04300	20.51	10.19	-1.00917	gi|255647773|gb|ACU24347.1|/0/unknown [Glycine max]		Glyma11g21670	11.99	34.48	1.52393	gi|255641242|gb|ACU20898.1|/0/unknown [Glycine max]		Glyma10g41130	6.72	0.7	-3.26303	gi|255640808|gb|ACU20687.1|/1.16587e-80/unknown [Glycine max]		Glyma09g41000	6.37	15.34	1.26793	gi|255639189|gb|ACU19893.1|/0/unknown [Glycine max]		Glyma05g02570	107.71	43.23	-1.31705	gi|255632023|gb|ACU16364.1|/4.35871e-82/unknown [Glycine max]		Glyma20g20950	6.16	21.17	1.78102	gi|255635617|gb|ACU18158.1|/1.80948e-77/unknown [Glycine max]		Glyma10g31240	134.94	53.99	-1.32155	gi|255642465|gb|ACU21496.1|/1.64686e-78/unknown [Glycine max]
Glyma06g03720	4.56	11.53	1.33829	gi|255641384|gb|ACU20969.1|/2.99335e-120/unknown [Glycine max]		Glyma08g25940	16.13	8.02	-1.00807	gi|255639255|gb|ACU19926.1|/4.05117e-146/unknown [Glycine max]		Glyma10g23450	6.18	17.76	1.52295	gi|255637560|gb|ACU19106.1|/7.23613e-61/unknown [Glycine max]		Glyma08g47210	9.99	1.04	-3.2639	gi|255631558|gb|ACU16146.1|/1.00388e-83/unknown [Glycine max]		Glyma13g16770	6.37	15.34	1.26793	gi|255641009|gb|ACU20784.1|/6.90176e-74/unknown [Glycine max]		Glyma02g00360	19.1	7.67	-1.31627	gi|255630837|gb|ACU15781.1|/1.86719e-19/unknown [Glycine max]		Glyma14g26700	3.34	11.47	1.77995	gi|255635996|gb|ACU18343.1|/3.08692e-149/unknown [Glycine max]		Glyma17g10170	19	7.59	-1.32383	gi|255632528|gb|ACU16614.1|/3.27951e-90/unknown [Glycine max]
Glyma13g07620	7.01	17.71	1.33708	gi|255625985|gb|ACU13337.1|/2.01931e-87/unknown [Glycine max]		Glyma06g37940	18.76	9.36	-1.00308	gi|255626391|gb|ACU13540.1|/7.17171e-34/unknown [Glycine max]		Glyma16g27820	4	11.49	1.52231	gi|255647757|gb|ACU24339.1|/1.15361e-158/unknown [Glycine max]		Glyma18g12180	5.09	0.52	-3.29108	gi|255646513|gb|ACU23734.1|/5.79921e-119/unknown [Glycine max]		Glyma10g28600	6.37	15.34	1.26793	gi|255638644|gb|ACU19627.1|/1.21987e-163/unknown [Glycine max]		Glyma19g45000	18.19	7.32	-1.31323	gi|255647474|gb|ACU24201.1|/0/unknown [Glycine max]		Glyma11g34270	14.6	50.11	1.77913	gi|255641998|gb|ACU21266.1|/1.36574e-136/unknown [Glycine max]		Glyma20g29700	15.48	6.18	-1.32473	gi|255627433|gb|ACU14061.1|/5.44552e-115/unknown [Glycine max]
Glyma08g45820	57.15	144.18	1.33505	gi|255625739|gb|ACU13214.1|/1.00957e-45/unknown [Glycine max]		Glyma07g00830	18.76	9.36	-1.00308	gi|255634718|gb|ACU17721.1|/1.59705e-83/unknown [Glycine max]		Glyma05g33640	29.07	83.42	1.52086	gi|255640157|gb|ACU20369.1|/4.0477e-126/unknown [Glycine max]		Glyma17g05540	93.76	9.4	-3.31824	gi|255632512|gb|ACU16606.1|/1.98655e-129/unknown [Glycine max]		Glyma16g26330	29.48	70.77	1.2634	gi|255642305|gb|ACU21417.1|/4.85915e-145/unknown [Glycine max]		Glyma12g06690	39.85	16.04	-1.31291	gi|255641929|gb|ACU21233.1|/0/unknown [Glycine max]		Glyma07g38780	2.11	7.23	1.77675	gi|255640366|gb|ACU20471.1|/1.34987e-52/unknown [Glycine max]		Glyma08g45120	48.21	19.23	-1.32597	gi|255641634|gb|ACU21089.1|/1.97737e-138/unknown [Glycine max]
Glyma05g22660	10.69	26.9	1.33134	gi|255641057|gb|ACU20808.1|/2.68316e-79/unknown [Glycine max]								Glyma02g42170	11.08	31.7	1.51652	gi|255625849|gb|ACU13269.1|/7.306e-90/unknown [Glycine max]		Glyma14g05640	12.36	1.22	-3.34073	gi|255626159|gb|ACU13424.1|/2.20412e-64/unknown [Glycine max]		Glyma10g09720	31.66	76	1.26334	gi|255640630|gb|ACU20600.1|/5.32076e-40/unknown [Glycine max]		Glyma16g08090	122.81	49.51	-1.31064	gi|255628245|gb|ACU14467.1|/6.96421e-112/unknown [Glycine max]		Glyma02g00360	9.85	33.7	1.77455	gi|255630837|gb|ACU15781.1|/1.86719e-19/unknown [Glycine max]		Glyma11g16210	54.89	21.88	-1.32693	gi|255645664|gb|ACU23326.1|/7.46745e-95/unknown [Glycine max]
Glyma19g37210	28.57	71.84	1.33029	gi|255641068|gb|ACU20813.1|/0/unknown [Glycine max]								Glyma02g17370	10.9	30.83	1.50001	gi|255640785|gb|ACU20676.1|/2.09919e-43/unknown [Glycine max]		Glyma18g05700	74.87	7.31	-3.35644	gi|255626107|gb|ACU13398.1|/4.75218e-122/unknown [Glycine max]		Glyma19g35710	6.91	16.56	1.26095	gi|255628737|gb|ACU14713.1|/1.94405e-119/unknown [Glycine max]		Glyma20g38080	78.96	31.9	-1.30757	gi|255627947|gb|ACU14318.1|/3.43285e-55/unknown [Glycine max]		Glyma01g39330	16.71	57.17	1.77455	gi|217074298|gb|ACJ85509.1|/7.17975e-180/unknown [Medicago truncatula]		Glyma06g03720	9.32	3.71	-1.32891	gi|255641384|gb|ACU20969.1|/2.99335e-120/unknown [Glycine max]
Glyma11g37440	13.32	33.41	1.32669	gi|255629119|gb|ACU14904.1|/6.01699e-111/unknown [Glycine max]								Glyma18g49950	10.18	28.74	1.49732	gi|255627285|gb|ACU13987.1|/2.20803e-60/unknown [Glycine max]		Glyma02g41820	43.61	4.18	-3.38308	gi|255641861|gb|ACU21199.1|/0/unknown [Glycine max]		Glyma12g01970	9.46	22.66	1.26024	gi|255626741|gb|ACU13715.1|/1.03662e-74/unknown [Glycine max]		Glyma09g15630	49.13	19.87	-1.30601	gi|255644684|gb|ACU22844.1|/0/unknown [Glycine max]		Glyma09g20030	24.46	83.46	1.77066	gi|255627515|gb|ACU14102.1|/2.14805e-98/unknown [Glycine max]		Glyma12g35400	11.08	4.41	-1.32911	gi|255637362|gb|ACU19010.1|/0/unknown [Glycine max]
Glyma08g21050	4.73	11.86	1.32619	gi|255639443|gb|ACU20016.1|/0/unknown [Glycine max]								Glyma02g39660	3.09	8.71	1.49507	gi|255636908|gb|ACU18787.1|/2.83503e-96/unknown [Glycine max]		Glyma01g07470	18.17	1.74	-3.3844	gi|255637700|gb|ACU19173.1|/8.78337e-91/unknown [Glycine max]		Glyma06g48330	7.28	17.43	1.25956	gi|255636262|gb|ACU18471.1|/1.77901e-115/unknown [Glycine max]		Glyma18g03530	28.75	11.68	-1.29952	gi|255645412|gb|ACU23202.1|/0/unknown [Glycine max]		Glyma08g12090	4.4	15	1.76939	gi|255639935|gb|ACU20260.1|/0/unknown [Glycine max]		Glyma11g35240	29.73	11.82	-1.33069	gi|255627291|gb|ACU13990.1|/8.84388e-148/unknown [Glycine max]
Glyma02g44710	12.27	30.74	1.32498	gi|217071004|gb|ACJ83862.1|/2.794e-64/unknown [Medicago truncatula]								Glyma09g02330	17.63	49.29	1.48326	gi|217075472|gb|ACJ86096.1|/6.54112e-113/unknown [Medicago truncatula]		Glyma03g30440	63.24	5.75	-3.4592	gi|255640861|gb|ACU20713.1|/4.05511e-56/unknown [Glycine max]		Glyma15g06100	33.48	79.84	1.25381	gi|255640000|gb|ACU20291.1|/0/unknown [Glycine max]		Glyma06g19250	46.21	18.83	-1.29517	gi|255645580|gb|ACU23284.1|/3.84307e-179/unknown [Glycine max]		Glyma09g00320	2.64	9	1.76939	gi|255644551|gb|ACU22778.1|/5.05128e-169/unknown [Glycine max]		Glyma09g41050	211.12	83.81	-1.33287	gi|255646846|gb|ACU23894.1|/3.46982e-153/unknown [Glycine max]
Glyma05g09300	9.47	23.72	1.32467	gi|255630617|gb|ACU15668.1|/1.1466e-39/unknown [Glycine max]								Glyma17g36210	23.8	66.36	1.47935	gi|255632117|gb|ACU16411.1|/2.61366e-112/unknown [Glycine max]		Glyma11g08050	7.81	0.7	-3.4799	gi|255639237|gb|ACU19917.1|/2.88491e-137/unknown [Glycine max]		Glyma07g39650	18.01	42.88	1.25151	gi|255644902|gb|ACU22951.1|/0/unknown [Glycine max]		Glyma06g11850	32.93	13.42	-1.29502	gi|255644617|gb|ACU22811.1|/0/unknown [Glycine max]		Glyma09g38600	4.05	13.76	1.76449	gi|255645646|gb|ACU23317.1|/7.5014e-115/unknown [Glycine max]		Glyma17g05570	22.7	9	-1.3347	gi|255648216|gb|ACU24561.1|/1.36241e-155/unknown [Glycine max]
Glyma16g01710	15.95	39.93	1.32392	gi|255630157|gb|ACU15432.1|/1.26646e-80/unknown [Glycine max]								Glyma06g05380	3.82	10.62	1.47514	gi|255632772|gb|ACU16739.1|/2.71056e-141/unknown [Glycine max]		Glyma13g17180	97.4	8.71	-3.48318	gi|255638914|gb|ACU19759.1|/8.19306e-135/unknown [Glycine max]		Glyma11g29350	17.47	41.49	1.24788	gi|255638384|gb|ACU19503.1|/3.32726e-134/unknown [Glycine max]		Glyma12g35370	11.1	4.53	-1.29298	gi|255634094|gb|ACU17410.1|/6.39734e-79/unknown [Glycine max]		Glyma05g34410	8.27	28.05	1.76204	gi|255629692|gb|ACU15195.1|/2.2227e-53/unknown [Glycine max]		Glyma14g36750	12.49	4.94	-1.33819	gi|255632454|gb|ACU16577.1|/2.71973e-80/unknown [Glycine max]
Glyma08g40970	9.82	24.56	1.32252	gi|255641463|gb|ACU21007.1|/2.9226e-143/unknown [Glycine max]								Glyma13g03510	3.82	10.62	1.47514	gi|255644789|gb|ACU22896.1|/1.8076e-133/unknown [Glycine max]		Glyma10g03640	31.44	2.79	-3.49426	gi|255628201|gb|ACU14445.1|/1.18512e-54/unknown [Glycine max]		Glyma11g05710	5.09	12.03	1.2409	gi|255632210|gb|ACU16463.1|/2.4544e-114/unknown [Glycine max]		Glyma10g24340	32.39	13.25	-1.28956	gi|255626265|gb|ACU13477.1|/6.96281e-119/unknown [Glycine max]		Glyma15g18170	9.68	32.82	1.7615	gi|255628485|gb|ACU14587.1|/4.29816e-123/unknown [Glycine max]		Glyma07g05720	22.34	8.82	-1.34078	gi|255645997|gb|ACU23486.1|/1.8099e-58/unknown [Glycine max]
Glyma09g01600	5.61	14.03	1.32244	gi|532703|gb|AAA65012.1|/9.65625e-48/unknown [Glycine max]								Glyma17g11640	5.09	14.11	1.47098	gi|255641717|gb|ACU21129.1|/4.55263e-136/unknown [Glycine max]		Glyma01g39720	4	0.35	-3.51457	gi|255637453|gb|ACU19054.1|/0/unknown [Glycine max]		Glyma20g22630	20.92	49.33	1.23758	gi|255626473|gb|ACU13581.1|/1.52288e-66/unknown [Glycine max]		Glyma08g15470	17.47	7.15	-1.28886	gi|255630800|gb|ACU15761.1|/1.51747e-40/unknown [Glycine max]		Glyma20g25020	9.32	31.58	1.76061	gi|255645168|gb|ACU23082.1|/0/unknown [Glycine max]		Glyma10g36780	22.34	8.82	-1.34078	gi|255642195|gb|ACU21362.1|/0/unknown [Glycine max]
Glyma01g41290	38.92	96.9	1.31598	gi|255628225|gb|ACU14457.1|/1.25257e-89/unknown [Glycine max]								Glyma13g01040	11.63	32.22	1.47011	gi|255635086|gb|ACU17901.1|/9.8185e-151/unknown [Glycine max]		Glyma06g16800	13.99	1.22	-3.51944	gi|255647983|gb|ACU24448.1|/2.26725e-48/unknown [Glycine max]		Glyma02g40960	13.83	32.6	1.23707	gi|255635712|gb|ACU18205.1|/1.38228e-129/unknown [Glycine max]		Glyma03g25550	10.19	4.18	-1.28558	gi|217074906|gb|ACJ85813.1|/0/unknown [Medicago truncatula]		Glyma19g19260	1.94	6.53	1.75103	gi|255627515|gb|ACU14102.1|/3.1043e-71/unknown [Glycine max]		Glyma16g28300	27.27	10.76	-1.34164	gi|255626487|gb|ACU13588.1|/1.86261e-47/unknown [Glycine max]
Glyma16g32230	13.85	34.42	1.31336	gi|255647927|gb|ACU24421.1|/2.29242e-171/unknown [Glycine max]								Glyma01g01220	6.36	17.59	1.46766	gi|255630573|gb|ACU15646.1|/7.91231e-67/unknown [Glycine max]		Glyma18g12670	73.05	6.27	-3.54235	gi|255646937|gb|ACU23938.1|/7.38154e-55/unknown [Glycine max]		Glyma19g42480	15.47	36.43	1.23565	gi|255626609|gb|ACU13649.1|/3.02937e-94/unknown [Glycine max]		Glyma11g07510	87.52	35.91	-1.28523	gi|255638858|gb|ACU19732.1|/3.49812e-170/unknown [Glycine max]		Glyma18g01830	80.75	271.19	1.74777	gi|217073376|gb|ACJ85047.1|/4.07069e-95/unknown [Medicago truncatula]		Glyma20g26140	173.12	68.28	-1.34224	gi|255640808|gb|ACU20687.1|/3.79891e-72/unknown [Glycine max]
Glyma16g05640	27.87	69.17	1.31143	gi|255638521|gb|ACU19569.1|/0/unknown [Glycine max]								Glyma13g05870	5.81	16.02	1.46326	gi|255644418|gb|ACU22714.1|/1.62734e-150/unknown [Glycine max]		Glyma13g06190	4.18	0.35	-3.57808	gi|255625585|gb|ACU13137.1|/8.53121e-62/unknown [Glycine max]		Glyma14g01130	67.68	159.32	1.23513	gi|255638947|gb|ACU19775.1|/6.24998e-155/unknown [Glycine max]		Glyma07g11890	27.47	11.33	-1.27771	gi|255646113|gb|ACU23543.1|/0/unknown [Glycine max]		Glyma10g26830	5.1	17.11	1.74627	gi|255641845|gb|ACU21191.1|/4.2968e-63/unknown [Glycine max]		Glyma09g38070	9.85	3.88	-1.34407	gi|255648371|gb|ACU24636.1|/5.80023e-102/unknown [Glycine max]
Glyma19g45000	4.38	10.86	1.31002	gi|255647474|gb|ACU24201.1|/0/unknown [Glycine max]								Glyma11g35470	16.72	45.98	1.45943	gi|255645875|gb|ACU23427.1|/1.38015e-119/unknown [Glycine max]		Glyma09g08250	6.36	0.52	-3.61244	gi|255644412|gb|ACU22711.1|/9.22758e-168/unknown [Glycine max]		Glyma18g49950	10.37	24.4	1.23447	gi|255627285|gb|ACU13987.1|/2.20803e-60/unknown [Glycine max]		Glyma12g31600	21.11	8.72	-1.27553	gi|30688302|ref|NP_680193.2|/1.19193e-121/unknown protein [Arabidopsis thaliana]		Glyma17g12800	435.27	1453	1.73905	gi|255630230|gb|ACU15470.1|/7.5507e-18/unknown [Glycine max]		Glyma09g17040	8.97	3.53	-1.34544	gi|255635153|gb|ACU17933.1|/0/unknown [Glycine max]
Glyma13g23740	31.2	77.19	1.30687	gi|255626563|gb|ACU13626.1|/6.94593e-84/unknown [Glycine max]								Glyma02g38450	19.26	52.94	1.45875	gi|255626107|gb|ACU13398.1|/2.80771e-128/unknown [Glycine max]		Glyma14g13770	8.72	0.7	-3.6389	gi|116831533|gb|ABK28719.1|/7.5401e-07/unknown [Arabidopsis thaliana]		Glyma07g38120	7.64	17.95	1.23234	gi|255638526|gb|ACU19571.1|/5.55434e-137/unknown [Glycine max]		Glyma05g04650	55.68	23.01	-1.2749	gi|255632244|gb|ACU16480.1|/2.82371e-106/unknown [Glycine max]		Glyma06g04640	17.77	59.28	1.7381	gi|255632705|gb|ACU16704.1|/2.5737e-74/unknown [Glycine max]		Glyma03g15130	30.96	12.17	-1.34708	gi|255629589|gb|ACU15142.1|/3.33922e-100/unknown [Glycine max]
Glyma18g05590	7.01	17.21	1.29576	gi|255626549|gb|ACU13619.1|/1.8605e-65/unknown [Glycine max]								Glyma11g02960	9.27	25.43	1.45589	gi|255637935|gb|ACU19284.1|/1.65512e-156/unknown [Glycine max]		Glyma16g28090	4.36	0.35	-3.6389	gi|255632786|gb|ACU16746.1|/5.98637e-97/unknown [Glycine max]		Glyma05g22270	10.55	24.75	1.23019	gi|255641811|gb|ACU21174.1|/6.27472e-161/unknown [Glycine max]		Glyma03g41200	20.2	8.37	-1.27106	gi|255637503|gb|ACU19078.1|/0/unknown [Glycine max]		Glyma02g40440	5.1	16.94	1.73186	gi|217072738|gb|ACJ84729.1|/2.64325e-131/unknown [Medicago truncatula]		Glyma10g26890	37.3	14.64	-1.34926	gi|255637525|gb|ACU19089.1|/2.70412e-126/unknown [Glycine max]
Glyma06g27440	7.36	18.04	1.29342	gi|255634528|gb|ACU17627.1|/0/unknown [Glycine max]								Glyma01g35360	9.09	24.9	1.45379	gi|255644607|gb|ACU22806.1|/2.00223e-97/unknown [Glycine max]		Glyma06g09340	11.08	0.87	-3.6708	gi|255634475|gb|ACU17602.1|/5.59403e-163/unknown [Glycine max]		Glyma11g33450	321.13	751.99	1.22756	gi|255635631|gb|ACU18165.1|/0/unknown [Glycine max]		Glyma09g31690	26.93	11.16	-1.27088	gi|255628529|gb|ACU14609.1|/2.24355e-86/unknown [Glycine max]		Glyma19g28420	4.57	15.17	1.73096	gi|255647700|gb|ACU24311.1|/3.28184e-78/unknown [Glycine max]		Glyma12g06540	30.61	12	-1.35097	gi|255635068|gb|ACU17892.1|/3.62745e-125/unknown [Glycine max]
Glyma11g09810	4.91	12.03	1.29284	gi|255639986|gb|ACU20285.1|/6.62581e-105/unknown [Glycine max]								Glyma15g15130	52.52	143.51	1.45021	gi|255626281|gb|ACU13485.1|/4.38624e-29/unknown [Glycine max]		Glyma19g05670	4.72	0.35	-3.75336	gi|255632530|gb|ACU16615.1|/1.40778e-25/unknown [Glycine max]		Glyma17g10920	12.74	29.81	1.22643	gi|255635892|gb|ACU18293.1|/0/unknown [Glycine max]		Glyma10g04650	17.65	7.32	-1.26975	gi|255634660|gb|ACU17692.1|/0/unknown [Glycine max]		Glyma15g40790	11.61	38.46	1.72799	gi|255627253|gb|ACU13971.1|/8.76269e-20/unknown [Glycine max]		Glyma19g36750	26.57	10.41	-1.35183	gi|255625821|gb|ACU13255.1|/1.61631e-46/unknown [Glycine max]
Glyma13g01040	18.76	45.94	1.29209	gi|255635086|gb|ACU17901.1|/9.8185e-151/unknown [Glycine max]								Glyma08g24950	8	21.77	1.44427	gi|217073079|gb|ACJ84899.1|/8.09225e-109/unknown [Medicago truncatula]		Glyma13g20600	9.63	0.7	-3.78211	gi|255630065|gb|ACU15386.1|/1.69236e-24/unknown [Glycine max]		Glyma13g06450	13.28	31.03	1.22441	gi|255625925|gb|ACU13307.1|/8.93764e-46/unknown [Glycine max]		Glyma02g12480	10.92	4.53	-1.26939	gi|217074508|gb|ACJ85614.1|/8.90561e-115/unknown [Medicago truncatula]		Glyma13g08700	4.75	15.7	1.72477	gi|118485788|gb|ABK94742.1|/1.83842e-87/unknown [Populus trichocarpa]		Glyma16g05900	11.26	4.41	-1.35236	gi|255635507|gb|ACU18105.1|/3.51073e-107/unknown [Glycine max]
Glyma05g03660	10.17	24.89	1.29125	gi|255647867|gb|ACU24392.1|/1.17737e-111/unknown [Glycine max]								Glyma20g02490	8	21.77	1.44427	gi|255641496|gb|ACU21023.1|/0/unknown [Glycine max]		Glyma06g02690	4.91	0.35	-3.8103	gi|255637777|gb|ACU19210.1|/2.30491e-32/unknown [Glycine max]		Glyma18g39930	31.11	72.69	1.22438	gi|255642211|gb|ACU21370.1|/3.27635e-142/unknown [Glycine max]		Glyma09g32470	16.38	6.8	-1.26833	gi|255642263|gb|ACU21396.1|/4.38917e-147/unknown [Glycine max]		Glyma06g10500	4.22	13.94	1.72392	gi|255628773|gb|ACU14731.1|/2.45126e-66/unknown [Glycine max]		Glyma08g46190	16.71	6.53	-1.35556	gi|255648360|gb|ACU24631.1|/0/unknown [Glycine max]
Glyma04g05800	15.43	37.76	1.29112	gi|255625663|gb|ACU13176.1|/1.63619e-60/unknown [Glycine max]								Glyma13g00560	17.81	48.42	1.44292	gi|255625807|gb|ACU13248.1|/1.85216e-54/unknown [Glycine max]		Glyma11g36030	12.54	0.87	-3.84938	gi|255628931|gb|ACU14810.1|/6.4873e-30/unknown [Glycine max]		Glyma03g00370	7.46	17.43	1.22433	gi|255637373|gb|ACU19015.1|/3.37398e-145/unknown [Glycine max]		Glyma07g06120	52.04	21.62	-1.26725	gi|255564699|ref|XP_002523344.1|/0/protein with unknown function [Ricinus communis]		Glyma15g40740	2.46	8.12	1.72282	gi|255627563|gb|ACU14126.1|/7.24463e-134/unknown [Glycine max]		Glyma06g20830	64.74	25.23	-1.35952	gi|255628287|gb|ACU14488.1|/3.80356e-61/unknown [Glycine max]
Glyma08g45580	27.52	67.33	1.29077	gi|255629211|gb|ACU14950.1|/3.65616e-121/unknown [Glycine max]								Glyma09g36720	4.18	11.32	1.4373	gi|118481295|gb|ABK92591.1|/1.93802e-147/unknown [Populus trichocarpa]		Glyma12g32390	15.81	1.04	-3.92618	gi|255647438|gb|ACU24183.1|/1.15925e-161/unknown [Glycine max]		Glyma02g47310	9.46	21.96	1.21497	gi|255629111|gb|ACU14900.1|/3.40438e-17/unknown [Glycine max]		Glyma13g27820	34.39	14.29	-1.26698	gi|217069992|gb|ACJ83356.1|/4.2551e-58/unknown [Medicago truncatula]		Glyma17g14910	2.46	8.12	1.72282	gi|255629766|gb|ACU15232.1|/2.03031e-50/unknown [Glycine max]		Glyma13g39280	49.44	19.23	-1.36232	gi|255630395|gb|ACU15554.1|/7.68045e-79/unknown [Glycine max]
Glyma07g10170	18.41	44.94	1.28751	gi|255630770|gb|ACU15746.1|/2.22222e-59/unknown [Glycine max]								Glyma11g13570	10.36	28.04	1.43646	gi|255634500|gb|ACU17614.1|/8.96501e-138/unknown [Glycine max]		Glyma05g36380	5.63	0.35	-4.00771	gi|255635728|gb|ACU18213.1|/2.00653e-69/unknown [Glycine max]		Glyma19g38730	9.1	21.09	1.21262	gi|255645924|gb|ACU23451.1|/9.10307e-166/unknown [Glycine max]		Glyma10g24350	13.83	5.75	-1.26617	gi|255647036|gb|ACU23986.1|/3.42187e-142/unknown [Glycine max]		Glyma05g05200	5.1	16.76	1.71645	gi|255631179|gb|ACU15955.1|/9.05982e-113/unknown [Glycine max]		Glyma20g26450	14.07	5.47	-1.36301	gi|255628425|gb|ACU14557.1|/5.35511e-129/unknown [Glycine max]
Glyma14g33210	67.49	163.73	1.27857	gi|255630343|gb|ACU15528.1|/8.38962e-41/unknown [Glycine max]								Glyma18g01730	4.72	12.71	1.42911	gi|255628887|gb|ACU14788.1|/2.38042e-99/unknown [Glycine max]		Glyma16g05640	17.08	1.04	-4.03765	gi|255638521|gb|ACU19569.1|/0/unknown [Glycine max]		Glyma16g28150	50.03	115.92	1.21226	gi|255626407|gb|ACU13548.1|/2.24293e-27/unknown [Glycine max]		Glyma04g14640	305.67	127.25	-1.26431	gi|255625667|gb|ACU13178.1|/6.00822e-108/unknown [Glycine max]		Glyma15g01080	3.17	10.41	1.71542	gi|255629494|gb|ACU15093.1|/1.08939e-89/unknown [Glycine max]		Glyma17g04060	31.32	12.17	-1.36376	gi|255631860|gb|ACU16297.1|/1.64872e-07/unknown [Glycine max]
Glyma20g02170	11.92	28.9	1.27769	gi|255631414|gb|ACU16074.1|/1.05923e-71/unknown [Glycine max]								Glyma20g24080	12.72	34.14	1.42436	gi|217071890|gb|ACJ84305.1|/7.99113e-86/unknown [Medicago truncatula]		Glyma06g05530	5.81	0.35	-4.05311	gi|255635522|gb|ACU18112.1|/0/unknown [Glycine max]		Glyma01g26970	12.19	28.24	1.21204	gi|255639070|gb|ACU19835.1|/6.10301e-110/unknown [Glycine max]		Glyma08g26830	18.01	7.5	-1.26384	gi|255647691|gb|ACU24307.1|/1.60393e-144/unknown [Glycine max]		Glyma01g33680	3.87	12.7	1.71442	gi|255647950|gb|ACU24432.1|/1.35004e-130/unknown [Glycine max]		Glyma11g25660	15.48	6	-1.36737	gi|255630988|gb|ACU15858.1|/1.56883e-64/unknown [Glycine max]
Glyma01g45520	4.56	11.03	1.27433	gi|255636278|gb|ACU18479.1|/7.37181e-155/unknown [Glycine max]								Glyma07g13450	37.98	101.88	1.42356	gi|255628261|gb|ACU14475.1|/7.26132e-50/unknown [Glycine max]		Glyma09g38320	15.45	0.87	-4.15045	gi|255632542|gb|ACU16621.1|/8.84541e-104/unknown [Glycine max]		Glyma07g06230	48.4	112.08	1.21145	gi|255641376|gb|ACU20965.1|/0/unknown [Glycine max]		Glyma02g41840	17.1	7.15	-1.25798	gi|255642291|gb|ACU21410.1|/2.5407e-130/unknown [Glycine max]		Glyma09g02330	14.6	47.82	1.71165	gi|217075472|gb|ACJ86096.1|/6.54112e-113/unknown [Medicago truncatula]		Glyma13g41110	17.77	6.88	-1.36896	gi|255625695|gb|ACU13192.1|/6.74892e-64/unknown [Glycine max]
Glyma20g33580	7.89	19.05	1.27169	gi|255637648|gb|ACU19148.1|/3.24978e-118/unknown [Glycine max]								Glyma15g10400	10.72	28.74	1.42276	gi|255646865|gb|ACU23903.1|/3.57174e-152/unknown [Glycine max]		Glyma17g15690	15.45	0.7	-4.46411	gi|255648310|gb|ACU24607.1|/1.4288e-100/unknown [Glycine max]		Glyma20g26720	9.64	22.31	1.21059	gi|217075086|gb|ACJ85903.1|/6.82379e-103/unknown [Medicago truncatula]		Glyma18g51120	20.01	8.37	-1.25742	gi|255646895|gb|ACU23917.1|/8.18e-84/unknown [Glycine max]		Glyma09g28490	5.28	17.29	1.71133	gi|255647032|gb|ACU23984.1|/2.02533e-176/unknown [Glycine max]		Glyma01g26970	42.4	16.41	-1.36949	gi|255639070|gb|ACU19835.1|/6.10301e-110/unknown [Glycine max]
Glyma19g39920	18.41	44.44	1.27137	gi|255628513|gb|ACU14601.1|/2.44622e-49/unknown [Glycine max]								Glyma06g04740	75.41	202.03	1.42174	gi|255627577|gb|ACU14133.1|/8.12278e-41/unknown [Glycine max]		Glyma02g16150	20.9	0.87	-4.58634	gi|255628201|gb|ACU14445.1|/1.45211e-54/unknown [Glycine max]		Glyma12g26980	10.55	24.4	1.20964	gi|255626701|gb|ACU13695.1|/2.71313e-71/unknown [Glycine max]		Glyma20g29040	21.65	9.06	-1.25678	gi|255625691|gb|ACU13190.1|/7.56043e-90/unknown [Glycine max]		Glyma10g03340	4.75	15.53	1.70906	gi|255634797|gb|ACU17759.1|/7.55665e-64/unknown [Glycine max]		Glyma09g37850	62.99	24.35	-1.3712	gi|255641702|gb|ACU21122.1|/7.37731e-127/unknown [Glycine max]
Glyma10g30880	125.69	302.73	1.26816	gi|255634656|gb|ACU17690.1|/1.92808e-179/unknown [Glycine max]								Glyma05g27980	17.44	46.68	1.4204	gi|255626779|gb|ACU13734.1|/9.25644e-118/unknown [Glycine max]		Glyma13g24490	70.14	2.44	-4.84528	gi|255627263|gb|ACU13976.1|/1.28686e-90/unknown [Glycine max]		Glyma09g39020	6.73	15.51	1.20452	gi|255645213|gb|ACU23104.1|/0/unknown [Glycine max]		Glyma20g23370	17.47	7.32	-1.25496	gi|255628875|gb|ACU14782.1|/4.07893e-83/unknown [Glycine max]		Glyma01g38800	7.74	25.23	1.70473	gi|255635983|gb|ACU18337.1|/0/unknown [Glycine max]		Glyma20g01130	12.32	4.76	-1.37197	gi|255637330|gb|ACU18995.1|/0/unknown [Glycine max]
Glyma09g22310	15.78	37.92	1.26486	gi|255640517|gb|ACU20544.1|/1.08593e-114/unknown [Glycine max]								Glyma17g17730	14.72	39.36	1.41895	gi|255637875|gb|ACU19256.1|/9.69224e-86/unknown [Glycine max]		Glyma03g32830	196.61	5.57	-5.14152	gi|255645809|gb|ACU23395.1|/5.28544e-28/unknown [Glycine max]		Glyma04g09830	7.28	16.73	1.20043	gi|255646799|gb|ACU23871.1|/1.2191e-81/unknown [Glycine max]		Glyma12g21080	11.64	4.88	-1.25414	gi|217074878|gb|ACJ85799.1|/2.33202e-32/unknown [Medicago truncatula]		Glyma05g38340	46.45	151.39	1.70452	gi|255638124|gb|ACU19376.1|/2.27938e-140/unknown [Glycine max]		Glyma11g36990	21.46	8.29	-1.37221	gi|255647665|gb|ACU24294.1|/1.09359e-152/unknown [Glycine max]
Glyma15g13860	9.82	23.56	1.26254	gi|255639588|gb|ACU20088.1|/1.01257e-44/unknown [Glycine max]								Glyma17g33100	6.91	18.46	1.41764	gi|255634526|gb|ACU17626.1|/2.7176e-92/unknown [Glycine max]		Glyma08g42260	18.72	0.52	-5.16993	gi|255646937|gb|ACU23938.1|/1.39437e-55/unknown [Glycine max]		Glyma16g01330	18.74	43.06	1.20023	gi|255641479|gb|ACU21015.1|/3.90584e-114/unknown [Glycine max]		Glyma20g04230	13.65	5.75	-1.24727	gi|255632135|gb|ACU16420.1|/7.01228e-46/unknown [Glycine max]		Glyma05g24960	19.18	62.46	1.70333	gi|255645181|gb|ACU23088.1|/2.94664e-57/unknown [Glycine max]		Glyma01g26980	10.56	4.06	-1.37906	gi|255630238|gb|ACU15474.1|/2.00115e-29/unknown [Glycine max]
Glyma07g01660	61.18	146.69	1.26164	gi|255635830|gb|ACU18263.1|/2.11115e-155/unknown [Glycine max]								Glyma05g34960	18.72	49.98	1.41677	gi|255642012|gb|ACU21273.1|/5.69101e-114/unknown [Glycine max]		Glyma16g01550	13.81	0.35	-5.30221	gi|255647062|gb|ACU23999.1|/6.58197e-85/unknown [Glycine max]		Glyma16g03230	7.82	17.95	1.19874	gi|255625961|gb|ACU13325.1|/2.36534e-70/unknown [Glycine max]		Glyma07g37800	25.65	10.81	-1.24659	gi|255637169|gb|ACU18915.1|/4.72916e-177/unknown [Glycine max]		Glyma11g15950	5.1	16.59	1.70174	gi|255645367|gb|ACU23180.1|/1.1053e-90/unknown [Glycine max]		Glyma04g37970	10.56	4.06	-1.37906	gi|255632444|gb|ACU16572.1|/2.29324e-93/unknown [Glycine max]
Glyma05g34220	7.19	17.21	1.25918	gi|255638229|gb|ACU19428.1|/3.18899e-119/unknown [Glycine max]								Glyma09g25940	22.9	61.13	1.41653	gi|217072942|gb|ACJ84831.1|/7.53014e-65/unknown [Medicago truncatula]		Glyma05g05420	15.81	0.35	-5.49734	gi|255648310|gb|ACU24607.1|/3.00581e-78/unknown [Glycine max]		Glyma05g38060	6.91	15.86	1.19864	gi|255638616|gb|ACU19614.1|/1.42214e-109/unknown [Glycine max]		Glyma08g09820	69.69	29.46	-1.24219	gi|255638112|gb|ACU19370.1|/0/unknown [Glycine max]		Glyma09g00770	2.99	9.7	1.69784	gi|255627583|gb|ACU14136.1|/8.03068e-102/unknown [Glycine max]		Glyma20g38580	67.03	25.76	-1.37967	gi|255626671|gb|ACU13680.1|/2.82546e-127/unknown [Glycine max]
Glyma06g41370	9.64	23.06	1.25829	gi|255629784|gb|ACU15241.1|/3.07037e-44/unknown [Glycine max]								Glyma13g33600	7.09	18.81	1.40764	gi|156972242|gb|ABU98949.1|/3.31862e-34/unknown [Lupinus albus]		Glyma02g45690	66.51	0.52	-6.99892	gi|255646937|gb|ACU23938.1|/4.06129e-31/unknown [Glycine max]		Glyma07g38310	17.1	39.22	1.19759	gi|255629181|gb|ACU14935.1|/8.31641e-72/unknown [Glycine max]		Glyma11g12480	37.48	15.86	-1.24073	gi|255625591|gb|ACU13140.1|/2.73849e-43/unknown [Glycine max]		Glyma11g04020	195.64	633.6	1.69537	gi|255626193|gb|ACU13441.1|/2.21773e-103/unknown [Glycine max]		Glyma02g41180	16.54	6.35	-1.38113	gi|255639541|gb|ACU20065.1|/1.53004e-134/unknown [Glycine max]
Glyma20g38100	14.2	33.91	1.25582	gi|255629436|gb|ACU15064.1|/5.07513e-85/unknown [Glycine max]								Glyma09g36930	21.44	56.78	1.40508	gi|255628613|gb|ACU14651.1|/3.45467e-93/unknown [Glycine max]		Glyma08g05680	2.36	0.01	-7.88264	gi|255642823|gb|ACU22113.1|/1.10401e-135/unknown [Glycine max]		Glyma13g42070	11.28	25.8	1.1936	gi|255645837|gb|ACU23409.1|/2.21993e-169/unknown [Glycine max]		Glyma19g41760	20.56	8.72	-1.23744	gi|255633060|gb|ACU16885.1|/9.53532e-92/unknown [Glycine max]		Glyma02g11140	2.29	7.41	1.69413	gi|217074036|gb|ACJ85378.1|/8.94446e-174/unknown [Medicago truncatula]		Glyma04g38140	40.11	15.35	-1.38572	gi|255637680|gb|ACU19163.1|/4.23772e-66/unknown [Glycine max]
Glyma11g06830	18.06	43.1	1.25489	gi|255625655|gb|ACU13172.1|/1.97331e-105/unknown [Glycine max]								Glyma02g25290	13.81	36.57	1.40495	gi|255645584|gb|ACU23286.1|/0/unknown [Glycine max]		Glyma01g36500	2.54	0.01	-7.98868	gi|255579031|ref|XP_002530367.1|/0/protein with unknown function [Ricinus communis]		Glyma17g10910	19.83	45.32	1.19246	gi|255632430|gb|ACU16565.1|/8.51285e-45/unknown [Glycine max]		Glyma11g00610	19.29	8.19	-1.23592	gi|255629271|gb|ACU14980.1|/1.21745e-102/unknown [Glycine max]		Glyma05g01730	2.46	7.94	1.69048	gi|255632528|gb|ACU16614.1|/2.40331e-94/unknown [Glycine max]		Glyma15g38220	134.77	51.52	-1.38729	gi|255628191|gb|ACU14440.1|/9.64101e-33/unknown [Glycine max]
Glyma15g07850	30.33	72.34	1.25405	gi|255646439|gb|ACU23698.1|/1.39376e-103/unknown [Glycine max]								Glyma07g29670	8.36	22.12	1.40378	gi|255645013|gb|ACU23006.1|/0/unknown [Glycine max]		Glyma05g01250	2.54	0.01	-7.98868	gi|255635026|gb|ACU17871.1|/5.66192e-93/unknown [Glycine max]		Glyma19g01200	52.95	120.97	1.19195	gi|255639115|gb|ACU19857.1|/0/unknown [Glycine max]		Glyma01g24360	82.06	34.86	-1.23511	gi|255644940|gb|ACU22970.1|/4.14119e-175/unknown [Glycine max]		Glyma06g10660	8.62	27.7	1.68413	gi|255545784|ref|XP_002513952.1|/0/protein with unknown function [Ricinus communis]		Glyma20g30380	36.95	14.12	-1.38783	gi|255635084|gb|ACU17900.1|/2.86924e-171/unknown [Glycine max]
Glyma06g14170	5.26	12.53	1.25225	gi|15238541|ref|NP_197834.1|/1.18735e-64/unknown protein [Arabidopsis thaliana]								Glyma14g14360	3.63	9.58	1.40006	gi|255641342|gb|ACU20948.1|/0/unknown [Glycine max]		Glyma05g22200	2.54	0.01	-7.98868	gi|255645967|gb|ACU23472.1|/3.78638e-07/unknown [Glycine max]		Glyma18g04660	106.62	243.52	1.19156	gi|255645255|gb|ACU23125.1|/0/unknown [Glycine max]		Glyma07g00970	29.48	12.55	-1.23205	gi|217074730|gb|ACJ85725.1|/0/unknown [Medicago truncatula]		Glyma10g26740	102.75	329.59	1.68153	gi|255628443|gb|ACU14566.1|/2.45979e-23/unknown [Glycine max]		Glyma09g01720	25.86	9.88	-1.38814	gi|255627355|gb|ACU14022.1|/1.98472e-87/unknown [Glycine max]
Glyma09g41640	5.26	12.53	1.25225	gi|255632669|gb|ACU16686.1|/2.95805e-46/unknown [Glycine max]								Glyma04g01700	22.9	60.43	1.39992	gi|255631734|gb|ACU16234.1|/8.75365e-117/unknown [Glycine max]		Glyma19g12650	2.54	0.01	-7.98868	gi|255629129|gb|ACU14909.1|/7.23016e-67/unknown [Glycine max]		Glyma12g29060	6.73	15.34	1.18862	gi|255641917|gb|ACU21227.1|/1.10756e-143/unknown [Glycine max]		Glyma15g13670	76.05	32.42	-1.23006	gi|255628253|gb|ACU14471.1|/1.06442e-102/unknown [Glycine max]		Glyma08g10060	7.04	22.58	1.6814	gi|255630768|gb|ACU15745.1|/1.92543e-42/unknown [Glycine max]		Glyma18g02400	77.24	29.47	-1.3901	gi|255628931|gb|ACU14810.1|/1.30373e-23/unknown [Glycine max]
Glyma15g39700	8.94	21.22	1.24708	gi|255646248|gb|ACU23608.1|/7.93872e-65/unknown [Glycine max]								Glyma15g08680	86.31	226.93	1.39465	gi|255637781|gb|ACU19212.1|/0/unknown [Glycine max]		Glyma13g02960	2.73	0.01	-8.09276	gi|255645408|gb|ACU23200.1|/0/unknown [Glycine max]		Glyma19g33010	6.37	14.47	1.1837	gi|255641035|gb|ACU20797.1|/1.33271e-120/unknown [Glycine max]		Glyma13g07620	23.65	10.11	-1.22606	gi|255625985|gb|ACU13337.1|/2.01931e-87/unknown [Glycine max]		Glyma14g02970	3.52	11.29	1.6814	gi|255638151|gb|ACU19389.1|/2.36778e-107/unknown [Glycine max]		Glyma11g12630	69.85	26.64	-1.39067	gi|255626165|gb|ACU13427.1|/1.16951e-95/unknown [Glycine max]
Glyma08g20320	7.54	17.88	1.24571	gi|217074730|gb|ACJ85725.1|/0/unknown [Medicago truncatula]								Glyma03g31470	27.98	73.5	1.39335	gi|255627331|gb|ACU14010.1|/5.84328e-91/unknown [Glycine max]		Glyma08g11560	2.91	0.01	-8.18488	gi|255635295|gb|ACU18001.1|/0/unknown [Glycine max]		Glyma12g04850	26.56	60.31	1.18314	gi|255647798|gb|ACU24359.1|/1.42803e-40/unknown [Glycine max]		Glyma08g46000	21.11	9.06	-1.22034	gi|255630742|gb|ACU15732.1|/7.63951e-54/unknown [Glycine max]		Glyma08g08690	7.57	24.17	1.67485	gi|255646695|gb|ACU23821.1|/9.61188e-136/unknown [Glycine max]		Glyma16g26870	35.19	13.41	-1.39186	gi|255635022|gb|ACU17869.1|/4.33456e-79/unknown [Glycine max]
Glyma02g02260	11.57	27.4	1.24379	gi|217073640|gb|ACJ85180.1|/4.38836e-93/unknown [Medicago truncatula]								Glyma08g15090	87.4	229.2	1.3909	gi|255626663|gb|ACU13676.1|/2.09343e-81/unknown [Glycine max]		Glyma18g04960	2.91	0.01	-8.18488	gi|255646046|gb|ACU23510.1|/7.52984e-121/unknown [Glycine max]		Glyma19g40620	21.65	49.16	1.18312	gi|255632161|gb|ACU16433.1|/1.2472e-98/unknown [Glycine max]		Glyma17g12960	12.55	5.4	-1.21666	gi|255645088|gb|ACU23043.1|/8.91963e-82/unknown [Glycine max]		Glyma15g18760	26.21	83.63	1.6739	gi|255635856|gb|ACU18275.1|/0/unknown [Glycine max]		Glyma06g13210	17.59	6.7	-1.39252	gi|255635898|gb|ACU18296.1|/0/unknown [Glycine max]
Glyma07g03560	59.78	141.51	1.24317	gi|255636198|gb|ACU18440.1|/1.47034e-87/unknown [Glycine max]								Glyma16g05350	157	411.37	1.38967	gi|255627111|gb|ACU13900.1|/1.94441e-73/unknown [Glycine max]		Glyma03g11670	3.09	0.01	-8.27146	gi|255627811|gb|ACU14250.1|/3.01772e-70/unknown [Glycine max]		Glyma07g09840	7.46	16.91	1.18063	gi|255646163|gb|ACU23567.1|/6.27449e-155/unknown [Glycine max]		Glyma01g06320	21.47	9.24	-1.21636	gi|255628471|gb|ACU14580.1|/1.07089e-117/unknown [Glycine max]		Glyma08g02590	2.99	9.53	1.67233	gi|255638027|gb|ACU19328.1|/9.65691e-103/unknown [Glycine max]		Glyma11g20600	8.8	3.35	-1.39334	gi|255639497|gb|ACU20043.1|/2.17647e-163/unknown [Glycine max]
Glyma15g40790	282.93	667.77	1.23891	gi|255627253|gb|ACU13971.1|/8.76269e-20/unknown [Glycine max]								Glyma12g13020	7.27	18.98	1.38445	gi|255635441|gb|ACU18073.1|/7.28382e-128/unknown [Glycine max]		Glyma08g17010	3.09	0.01	-8.27146	gi|255645379|gb|ACU23186.1|/3.27311e-172/unknown [Glycine max]		Glyma01g39020	18.38	41.66	1.18053	gi|217072176|gb|ACJ84448.1|/4.03089e-170/unknown [Medicago truncatula]		Glyma13g06920	175.21	75.48	-1.21492	gi|255628419|gb|ACU14554.1|/1.19088e-62/unknown [Glycine max]		Glyma14g04780	25.33	80.63	1.67047	gi|255635621|gb|ACU18160.1|/2.76264e-168/unknown [Glycine max]		Glyma11g04380	10.2	3.88	-1.39444	gi|255644908|gb|ACU22954.1|/4.30719e-132/unknown [Glycine max]
Glyma07g07270	7.01	16.54	1.23847	gi|255635137|gb|ACU17925.1|/0/unknown [Glycine max]								Glyma0048s00330	5.81	15.15	1.38271	gi|255633312|gb|ACU17013.1|/1.17202e-43/unknown [Glycine max]		Glyma13g35320	3.09	0.01	-8.27146	gi|255629420|gb|ACU15056.1|/4.3064e-41/unknown [Glycine max]		Glyma01g31750	96.79	219.11	1.17873	gi|255637984|gb|ACU19308.1|/2.76793e-99/unknown [Glycine max]		Glyma15g14970	34.75	14.99	-1.21301	gi|255632372|gb|ACU16536.1|/1.26866e-38/unknown [Glycine max]		Glyma15g40100	6.16	19.59	1.66912	gi|255647835|gb|ACU24377.1|/1.95603e-69/unknown [Glycine max]		Glyma14g33210	59.47	22.58	-1.39712	gi|255630343|gb|ACU15528.1|/8.38962e-41/unknown [Glycine max]
Glyma20g16920	17.35	40.93	1.23822	gi|255626435|gb|ACU13562.1|/1.32222e-118/unknown [Glycine max]								Glyma07g36970	8.36	21.77	1.38077	gi|255628477|gb|ACU14583.1|/6.19554e-45/unknown [Glycine max]		Glyma03g32920	4	0.01	-8.64386	gi|217071888|gb|ACJ84304.1|/1.65446e-151/unknown [Medicago truncatula]		Glyma11g06770	8.01	18.13	1.1785	gi|217072372|gb|ACJ84546.1|/5.56836e-99/unknown [Medicago truncatula]		Glyma18g50700	16.56	7.15	-1.21169	gi|255639090|gb|ACU19845.1|/1.13567e-172/unknown [Glycine max]		Glyma02g23860	29.38	93.16	1.66488	gi|255640442|gb|ACU20508.1|/1.61026e-36/unknown [Glycine max]		Glyma19g37100	243.67	92.46	-1.39803	gi|255637756|gb|ACU19200.1|/0/unknown [Glycine max]
Glyma15g22780	6.66	15.7	1.23717	gi|255631458|gb|ACU16096.1|/3.55662e-46/unknown [Glycine max]								Glyma09g36640	35.07	91.26	1.37975	gi|255625847|gb|ACU13268.1|/2.95932e-99/unknown [Glycine max]		Glyma09g41460	4	0.01	-8.64386	gi|255629331|gb|ACU15010.1|/2.85605e-53/unknown [Glycine max]		Glyma06g07510	12.37	27.89	1.1729	gi|255628199|gb|ACU14444.1|/1.93749e-62/unknown [Glycine max]		Glyma07g16420	147.74	63.8	-1.21143	gi|255627827|gb|ACU14258.1|/5.20886e-33/unknown [Glycine max]		Glyma13g02220	3.52	11.12	1.65951	gi|255629990|gb|ACU15347.1|/6.46266e-27/unknown [Glycine max]		Glyma03g32380	13.02	4.94	-1.39815	gi|255629315|gb|ACU15002.1|/1.12255e-75/unknown [Glycine max]
Glyma03g36270	21.04	49.45	1.23284	gi|255641723|gb|ACU21132.1|/0/unknown [Glycine max]								Glyma15g11360	3.82	9.93	1.37822	gi|255638213|gb|ACU19420.1|/6.91374e-68/unknown [Glycine max]		Glyma11g36170	4.36	0.01	-8.76818	gi|255640420|gb|ACU20497.1|/6.20935e-75/unknown [Glycine max]		Glyma09g28640	63.32	142.76	1.17286	gi|255646745|gb|ACU23846.1|/1.67325e-132/unknown [Glycine max]		Glyma13g19500	107.71	46.72	-1.20504	gi|255632298|gb|ACU16507.1|/6.9899e-99/unknown [Glycine max]		Glyma12g28620	2.29	7.23	1.65865	gi|92893672|gb|ABE91850.1|/3.12999e-152/Protein of unknown function DUF707 [Medicago truncatula]		Glyma12g35350	19.53	7.41	-1.39815	gi|255642537|gb|ACU21532.1|/2.16526e-178/unknown [Glycine max]
Glyma11g36030	15.08	35.42	1.23193	gi|255628931|gb|ACU14810.1|/6.4873e-30/unknown [Glycine max]								Glyma12g05150	46.52	120.87	1.37753	gi|255626673|gb|ACU13681.1|/2.73018e-80/unknown [Glycine max]		Glyma08g17890	4.54	0.01	-8.82655	gi|255633722|gb|ACU17221.1|/1.41105e-62/unknown [Glycine max]		Glyma09g24070	42.76	96.4	1.17277	gi|255631306|gb|ACU16020.1|/3.11217e-87/unknown [Glycine max]		Glyma09g30670	16.01	6.97	-1.19974	gi|255636694|gb|ACU18683.1|/1.41669e-180/unknown [Glycine max]		Glyma13g31500	38.35	121.04	1.65819	gi|255641109|gb|ACU20833.1|/5.67146e-103/unknown [Glycine max]		Glyma06g44050	52.6	19.94	-1.3994	gi|255631596|gb|ACU16165.1|/9.94393e-74/unknown [Glycine max]
Glyma13g17640	17.88	41.77	1.22412	gi|255628097|gb|ACU14393.1|/9.47129e-107/unknown [Glycine max]								Glyma05g36960	30.71	79.59	1.37388	gi|255626215|gb|ACU13452.1|/1.13314e-65/unknown [Glycine max]		Glyma19g35530	4.54	0.01	-8.82655	gi|255645809|gb|ACU23395.1|/1.27796e-20/unknown [Glycine max]		Glyma17g15720	6.19	13.95	1.17225	gi|255635880|gb|ACU18287.1|/1.33766e-148/unknown [Glycine max]		Glyma09g06860	44.76	19.52	-1.19726	gi|255628485|gb|ACU14587.1|/1.90486e-125/unknown [Glycine max]		Glyma04g08510	13.02	40.93	1.65243	gi|255636576|gb|ACU18626.1|/3.29751e-174/unknown [Glycine max]		Glyma08g42910	39.59	15	-1.40017	gi|255637290|gb|ACU18975.1|/1.72711e-88/unknown [Glycine max]
Glyma20g38960	7.54	17.54	1.21801	gi|255646863|gb|ACU23902.1|/3.75858e-162/unknown [Glycine max]								Glyma17g09500	8.9	22.99	1.36913	gi|255627449|gb|ACU14069.1|/4.62653e-91/unknown [Glycine max]		Glyma13g29070	4.72	0.01	-8.88264	gi|255630099|gb|ACU15403.1|/7.83553e-66/unknown [Glycine max]		Glyma13g18950	64.95	146.08	1.16936	gi|255645431|gb|ACU23211.1|/0/unknown [Glycine max]		Glyma02g07130	63.14	27.54	-1.19703	gi|255632206|gb|ACU16461.1|/1.21515e-133/unknown [Glycine max]		Glyma01g34930	2.64	8.29	1.65083	gi|255635260|gb|ACU17984.1|/1.23346e-38/unknown [Glycine max]		Glyma02g09030	25.16	9.53	-1.40058	gi|255635900|gb|ACU18297.1|/0/unknown [Glycine max]
Glyma01g44530	34.36	79.86	1.21674	gi|255628983|gb|ACU14836.1|/5.51379e-77/unknown [Glycine max]								Glyma02g31550	6.54	16.89	1.36881	gi|255646280|gb|ACU23624.1|/2.18028e-140/unknown [Glycine max]		Glyma11g05560	4.91	0.01	-8.93958	gi|255637453|gb|ACU19054.1|/3.77759e-178/unknown [Glycine max]		Glyma01g44040	67.68	152.18	1.16898	gi|255640342|gb|ACU20459.1|/1.15752e-53/unknown [Glycine max]		Glyma09g40690	60.22	26.32	-1.19408	gi|217074426|gb|ACJ85573.1|/0/unknown [Medicago truncatula]		Glyma09g04520	27.09	85.05	1.65055	gi|255631494|gb|ACU16114.1|/2.23111e-83/unknown [Glycine max]		Glyma18g12210	87.26	32.99	-1.40329	gi|255634276|gb|ACU17502.1|/9.07318e-126/unknown [Glycine max]
Glyma15g05170	14.02	32.24	1.20137	gi|255636134|gb|ACU18410.1|/5.96537e-38/unknown [Glycine max]								Glyma09g39070	6.18	15.85	1.3588	gi|255631838|gb|ACU16286.1|/3.48337e-30/unknown [Glycine max]		Glyma07g13780	5.27	0.01	-9.04166	gi|255638743|gb|ACU19676.1|/0/unknown [Glycine max]		Glyma04g01360	15.28	34.34	1.16825	gi|255626409|gb|ACU13549.1|/3.27967e-68/unknown [Glycine max]		Glyma07g05310	27.11	11.85	-1.19394	gi|255636949|gb|ACU18807.1|/0/unknown [Glycine max]		Glyma11g20550	18.83	59.11	1.65037	gi|217071104|gb|ACJ83912.1|/3.11195e-27/unknown [Medicago truncatula]		Glyma13g38040	44.34	16.76	-1.40359	gi|255647438|gb|ACU24183.1|/2.34991e-162/unknown [Glycine max]
Glyma07g17030	95.89	220.36	1.20041	gi|255626313|gb|ACU13501.1|/1.2796e-54/unknown [Glycine max]								Glyma17g02570	6.18	15.85	1.3588	gi|255635572|gb|ACU18136.1|/0/unknown [Glycine max]		Glyma10g29890	5.63	0.01	-9.13699	gi|255629219|gb|ACU14954.1|/2.17213e-67/unknown [Glycine max]		Glyma08g26110	14.37	32.25	1.16624	gi|255633050|gb|ACU16880.1|/8.47098e-73/unknown [Glycine max]		Glyma04g35730	47.85	20.92	-1.19364	gi|255645580|gb|ACU23284.1|/0/unknown [Glycine max]		Glyma13g38660	5.81	18.17	1.64495	gi|255628573|gb|ACU14631.1|/1.54211e-81/unknown [Glycine max]		Glyma05g09270	611.2	230.43	-1.40732	gi|255626467|gb|ACU13578.1|/1.37462e-114/unknown [Glycine max]
Glyma06g06300	17	38.93	1.19535	gi|255634632|gb|ACU17678.1|/1.18062e-118/unknown [Glycine max]								Glyma15g08160	7.81	20.03	1.35877	gi|255626481|gb|ACU13585.1|/9.96265e-101/unknown [Glycine max]		Glyma16g01820	5.63	0.01	-9.13699	gi|255639875|gb|ACU20230.1|/4.81345e-110/unknown [Glycine max]		Glyma07g15960	14.01	31.38	1.16339	gi|255642211|gb|ACU21370.1|/4.98499e-152/unknown [Glycine max]		Glyma17g14920	273.28	120.28	-1.18398	gi|255629766|gb|ACU15232.1|/1.89607e-18/unknown [Glycine max]		Glyma08g23250	4.4	13.76	1.64491	gi|255641330|gb|ACU20942.1|/2.54868e-165/unknown [Glycine max]		Glyma04g38740	27.62	10.41	-1.40774	gi|255637253|gb|ACU18957.1|/7.88317e-33/unknown [Glycine max]
Glyma09g25940	38.92	89.05	1.1941	gi|217072942|gb|ACJ84831.1|/7.53014e-65/unknown [Medicago truncatula]								Glyma10g31740	11.63	29.78	1.35649	gi|255630504|gb|ACU15610.1|/1.08011e-55/unknown [Glycine max]		Glyma13g31580	7.63	0.01	-9.57554	gi|255636427|gb|ACU18552.1|/1.78156e-137/unknown [Glycine max]		Glyma13g04780	21.65	48.46	1.16243	gi|255639251|gb|ACU19924.1|/1.61334e-164/unknown [Glycine max]		Glyma18g45260	36.03	15.86	-1.18381	gi|255639802|gb|ACU20194.1|/1.83553e-161/unknown [Glycine max]		Glyma03g26680	8.97	28.05	1.64482	gi|255625657|gb|ACU13173.1|/2.64888e-142/unknown [Glycine max]		Glyma07g15960	265.14	99.87	-1.40863	gi|255642211|gb|ACU21370.1|/4.98499e-152/unknown [Glycine max]
Glyma15g24060	11.39	26.06	1.19407	gi|255647144|gb|ACU24040.1|/0/unknown [Glycine max]								Glyma20g28890	390.87	1000.73	1.35629	gi|255627107|gb|ACU13898.1|/3.51259e-80/unknown [Glycine max]		Glyma03g04370	10.36	0.01	-10.0168	gi|255648304|gb|ACU24604.1|/4.1807e-63/unknown [Glycine max]		Glyma03g41120	12.01	26.84	1.16015	gi|255634656|gb|ACU17690.1|/9.97334e-160/unknown [Glycine max]		Glyma16g00470	13.83	6.1	-1.18092	gi|255629724|gb|ACU15211.1|/1.9992e-67/unknown [Glycine max]		Glyma04g10170	4.57	14.29	1.64474	gi|217074914|gb|ACJ85817.1|/1.43327e-38/unknown [Medicago truncatula]		Glyma06g13710	9.85	3.71	-1.4087	gi|255630583|gb|ACU15651.1|/9.28005e-66/unknown [Glycine max]
Glyma03g35980	65.21	148.86	1.19079	gi|255640630|gb|ACU20600.1|/7.05608e-99/unknown [Glycine max]								Glyma20g23000	4.36	11.15	1.35464	gi|255646276|gb|ACU23622.1|/9.88368e-124/unknown [Glycine max]		Glyma03g16140	14.9	0.01	-10.5411	gi|255646494|gb|ACU23725.1|/0/unknown [Glycine max]		Glyma20g24730	5.46	12.2	1.15991	gi|255645278|gb|ACU23136.1|/4.5283e-97/unknown [Glycine max]		Glyma01g03590	39.48	17.43	-1.17955	gi|255631340|gb|ACU16037.1|/3.98645e-36/unknown [Glycine max]		Glyma17g10770	10.91	34.05	1.642	gi|255646231|gb|ACU23600.1|/1.78785e-128/unknown [Glycine max]		Glyma17g36230	11.26	4.23	-1.41248	gi|118487990|gb|ABK95816.1|/4.91458e-160/unknown [Populus trichocarpa]
Glyma05g25800	7.54	17.21	1.19061	gi|255633598|gb|ACU17158.1|/2.66035e-23/unknown [Glycine max]								Glyma08g06280	6.54	16.72	1.35421	gi|255637619|gb|ACU19134.1|/8.94943e-103/unknown [Glycine max]								Glyma02g01240	8.19	18.3	1.15991	gi|255633310|gb|ACU17012.1|/1.05983e-54/unknown [Glycine max]		Glyma12g31930	65.5	28.94	-1.17843	gi|255629700|gb|ACU15199.1|/4.27561e-84/unknown [Glycine max]		Glyma11g15030	4.75	14.82	1.64155	gi|255645052|gb|ACU23025.1|/0/unknown [Glycine max]		Glyma04g41130	25.86	9.7	-1.41467	gi|255626117|gb|ACU13403.1|/1.67302e-90/unknown [Glycine max]
Glyma10g43770	98.34	223.87	1.18681	gi|255626269|gb|ACU13479.1|/2.70014e-55/unknown [Glycine max]								Glyma12g32230	7.09	18.11	1.35293	gi|255625947|gb|ACU13318.1|/5.4844e-67/unknown [Glycine max]								Glyma08g38210	14.92	33.29	1.15784	gi|255647606|gb|ACU24266.1|/3.485e-125/unknown [Glycine max]		Glyma15g15800	370.44	164.03	-1.17528	gi|255634254|gb|ACU17491.1|/3.70458e-36/unknown [Glycine max]		Glyma03g27760	10.2	31.76	1.63864	gi|255639299|gb|ACU19947.1|/0/unknown [Glycine max]		Glyma13g10800	30.61	11.47	-1.41614	gi|255625661|gb|ACU13175.1|/5.22076e-86/unknown [Glycine max]
Glyma13g37750	5.43	12.36	1.18665	gi|255630421|gb|ACU15567.1|/2.51421e-45/unknown [Glycine max]								Glyma13g06170	4.91	12.54	1.35274	gi|255647691|gb|ACU24307.1|/0/unknown [Glycine max]								Glyma20g39160	9.64	21.44	1.1532	gi|255636715|gb|ACU18693.1|/3.82233e-164/unknown [Glycine max]		Glyma03g26060	36.21	16.04	-1.17471	gi|255633792|gb|ACU17256.1|/1.81207e-67/unknown [Glycine max]		Glyma18g02590	24.1	74.81	1.6342	gi|255636662|gb|ACU18668.1|/3.69848e-136/unknown [Glycine max]		Glyma02g45820	11.79	4.41	-1.41871	gi|217073510|gb|ACJ85115.1|/0/unknown [Medicago truncatula]
Glyma11g02960	6.84	15.54	1.18392	gi|255637935|gb|ACU19284.1|/1.65512e-156/unknown [Glycine max]								Glyma18g02920	5.81	14.8	1.34899	gi|255646665|gb|ACU23806.1|/6.49704e-89/unknown [Glycine max]								Glyma01g09460	9.1	20.22	1.15184	gi|255637939|gb|ACU19286.1|/6.43819e-39/unknown [Glycine max]		Glyma10g00850	20.01	8.89	-1.17047	gi|255631576|gb|ACU16155.1|/4.56874e-78/unknown [Glycine max]		Glyma20g23590	3.87	12	1.63263	gi|217074672|gb|ACJ85696.1|/3.66562e-92/unknown [Medicago truncatula]		Glyma06g13150	22.17	8.29	-1.41916	gi|255631157|gb|ACU15944.1|/5.02165e-105/unknown [Glycine max]
Glyma06g15030	11.92	27.07	1.18331	gi|255635013|gb|ACU17865.1|/0/unknown [Glycine max]								Glyma12g30260	22.71	57.82	1.34824	gi|255631462|gb|ACU16098.1|/1.36863e-95/unknown [Glycine max]								Glyma01g33220	27.47	61.01	1.15119	gi|255626431|gb|ACU13560.1|/7.56389e-103/unknown [Glycine max]		Glyma10g26220	61.86	27.54	-1.16748	gi|255630137|gb|ACU15422.1|/2.63212e-26/unknown [Glycine max]		Glyma13g32150	10.73	33.17	1.62823	gi|255641403|gb|ACU20978.1|/2.3391e-159/unknown [Glycine max]		Glyma15g19100	874.58	326.95	-1.41952	gi|255628121|gb|ACU14405.1|/2.41539e-40/unknown [Glycine max]
Glyma11g11280	31.2	70.84	1.18302	gi|255626659|gb|ACU13674.1|/6.65184e-53/unknown [Glycine max]								Glyma06g47960	6.72	17.07	1.34493	gi|255632153|gb|ACU16429.1|/3.05286e-46/unknown [Glycine max]								Glyma13g07250	8.01	17.78	1.15038	gi|255635297|gb|ACU18002.1|/7.81116e-167/unknown [Glycine max]		Glyma07g16020	60.59	27.02	-1.16505	gi|255640503|gb|ACU20537.1|/1.06457e-171/unknown [Glycine max]		Glyma16g29640	4.4	13.59	1.62697	gi|255638580|gb|ACU19597.1|/4.48115e-86/unknown [Glycine max]		Glyma08g23580	19.35	7.23	-1.42027	gi|255628399|gb|ACU14544.1|/3.5948e-112/unknown [Glycine max]
Glyma02g02740	32.96	74.68	1.18001	gi|255636393|gb|ACU18535.1|/7.45178e-116/unknown [Glycine max]								Glyma04g34960	21.81	55.38	1.34438	gi|255627921|gb|ACU14305.1|/1.40649e-49/unknown [Glycine max]								Glyma11g33590	39.12	86.81	1.14995	gi|255629193|gb|ACU14941.1|/7.62225e-104/unknown [Glycine max]		Glyma17g10770	60.95	27.19	-1.16455	gi|255646231|gb|ACU23600.1|/1.78785e-128/unknown [Glycine max]		Glyma13g20830	146.2	451.34	1.62627	gi|255639723|gb|ACU20155.1|/1.3468e-125/unknown [Glycine max]		Glyma06g19530	38.35	14.29	-1.42422	gi|255629229|gb|ACU14959.1|/1.55139e-09/unknown [Glycine max]
Glyma10g33520	74.33	168.07	1.17705	gi|255640314|gb|ACU20445.1|/7.79518e-118/unknown [Glycine max]								Glyma01g38750	557.5	1415.23	1.34399	gi|255645939|gb|ACU23458.1|/6.71054e-175/unknown [Glycine max]								Glyma17g15820	10.92	24.23	1.14982	gi|255637347|gb|ACU19003.1|/3.22487e-163/unknown [Glycine max]		Glyma05g03150	64.41	28.76	-1.16322	gi|217074734|gb|ACJ85727.1|/0/unknown [Medicago truncatula]		Glyma03g06410	2.81	8.65	1.62213	gi|255631482|gb|ACU16108.1|/2.91684e-93/unknown [Glycine max]		Glyma08g06820	174.7	64.93	-1.42792	gi|255639521|gb|ACU20055.1|/0/unknown [Glycine max]
Glyma13g11100	33.31	75.18	1.17439	gi|255644756|gb|ACU22880.1|/2.71633e-27/unknown [Glycine max]								Glyma20g16910	61.06	153.96	1.33426	gi|255637560|gb|ACU19106.1|/1.31511e-99/unknown [Glycine max]								Glyma04g38140	13.83	30.68	1.1495	gi|255637680|gb|ACU19163.1|/4.23772e-66/unknown [Glycine max]		Glyma18g11010	273.65	122.19	-1.16321	gi|217075238|gb|ACJ85979.1|/1.87417e-51/unknown [Medicago truncatula]		Glyma09g07410	6.86	21	1.61411	gi|255646072|gb|ACU23523.1|/8.22905e-128/unknown [Glycine max]		Glyma06g18970	9.5	3.53	-1.42826	gi|255635613|gb|ACU18156.1|/0/unknown [Glycine max]
Glyma16g06450	18.06	40.6	1.16868	gi|255644420|gb|ACU22715.1|/3.02062e-73/unknown [Glycine max]								Glyma06g09750	4.91	12.37	1.33305	gi|255629243|gb|ACU14966.1|/4.43008e-115/unknown [Glycine max]								Glyma06g48180	12.19	27.02	1.14833	gi|255633086|gb|ACU16898.1|/1.29605e-86/unknown [Glycine max]		Glyma16g27820	24.2	10.81	-1.16264	gi|255647757|gb|ACU24339.1|/1.15361e-158/unknown [Glycine max]		Glyma01g22510	3.17	9.7	1.6135	gi|217074036|gb|ACJ85378.1|/0/unknown [Medicago truncatula]		Glyma08g43690	9.5	3.53	-1.42826	gi|255632091|gb|ACU16398.1|/2.50819e-100/unknown [Glycine max]
Glyma05g26660	9.82	22.05	1.16698	gi|255640247|gb|ACU20414.1|/0/unknown [Glycine max]								Glyma14g39940	433.75	1091.46	1.33132	gi|255646899|gb|ACU23919.1|/4.29461e-152/unknown [Glycine max]								Glyma10g28560	36.93	81.75	1.14643	gi|255626473|gb|ACU13581.1|/1.49813e-113/unknown [Glycine max]		Glyma03g29930	32.39	14.47	-1.16248	gi|255634852|gb|ACU17785.1|/4.59074e-178/unknown [Glycine max]		Glyma18g52600	20.76	63.52	1.6134	gi|255636202|gb|ACU18442.1|/0/unknown [Glycine max]		Glyma14g03180	14.25	5.29	-1.42962	gi|255627509|gb|ACU14099.1|/4.85834e-37/unknown [Glycine max]
Glyma11g04130	26.29	58.98	1.16571	gi|255628225|gb|ACU14457.1|/1.14447e-98/unknown [Glycine max]								Glyma19g35290	5.63	14.11	1.32551	gi|255628025|gb|ACU14357.1|/5.31597e-60/unknown [Glycine max]								Glyma09g02910	7.82	17.26	1.14219	gi|255644928|gb|ACU22964.1|/0/unknown [Glycine max]		Glyma15g13650	132.09	59.09	-1.16054	gi|217071114|gb|ACJ83917.1|/4.79696e-69/unknown [Medicago truncatula]		Glyma16g02350	3.87	11.82	1.61082	gi|255626119|gb|ACU13404.1|/1.23108e-84/unknown [Glycine max]		Glyma16g22060	120.69	44.64	-1.4349	gi|255628371|gb|ACU14530.1|/3.41163e-33/unknown [Glycine max]
Glyma17g00880	5.96	13.37	1.16562	gi|255633178|gb|ACU16945.1|/1.18003e-133/unknown [Glycine max]								Glyma04g43160	7.45	18.64	1.32309	gi|255627345|gb|ACU14017.1|/3.41292e-43/unknown [Glycine max]								Glyma06g42140	28.75	63.45	1.14206	gi|217072292|gb|ACJ84506.1|/1.90497e-157/unknown [Medicago truncatula]		Glyma02g41820	33.84	15.17	-1.15751	gi|255641861|gb|ACU21199.1|/0/unknown [Glycine max]		Glyma07g15930	13.37	40.76	1.60815	gi|255635789|gb|ACU18243.1|/0/unknown [Glycine max]		Glyma05g29950	16.71	6.18	-1.43503	gi|118488451|gb|ABK96040.1|/3.2601e-10/unknown [Populus trichocarpa]
Glyma14g13970	18.23	40.76	1.16084	gi|255647372|gb|ACU24152.1|/1.00881e-145/unknown [Glycine max]								Glyma02g05370	17.08	42.67	1.32091	gi|255645121|gb|ACU23059.1|/5.15692e-130/unknown [Glycine max]								Glyma18g03230	14.56	32.07	1.13921	gi|255625885|gb|ACU13287.1|/3.6016e-22/unknown [Glycine max]		Glyma17g06610	14.74	6.62	-1.15483	gi|255634465|gb|ACU17597.1|/6.64614e-74/unknown [Glycine max]		Glyma18g45080	9.85	30	1.60677	gi|255631732|gb|ACU16233.1|/1.37782e-106/unknown [Glycine max]		Glyma17g01010	46.8	17.29	-1.43657	gi|255633318|gb|ACU17016.1|/3.88559e-84/unknown [Glycine max]
Glyma09g32790	13.85	30.91	1.15819	gi|217073014|gb|ACJ84867.1|/1.05978e-145/unknown [Medicago truncatula]								Glyma18g08070	4.54	11.32	1.31811	gi|255638715|gb|ACU19662.1|/2.36913e-180/unknown [Glycine max]								Glyma10g38880	17.65	38.87	1.13899	gi|255629227|gb|ACU14958.1|/4.48022e-119/unknown [Glycine max]		Glyma09g37120	15.47	6.97	-1.15024	gi|255632814|gb|ACU16760.1|/3.33279e-81/unknown [Glycine max]		Glyma18g39880	5.98	18.17	1.60334	gi|255635789|gb|ACU18243.1|/0/unknown [Glycine max]		Glyma08g05290	82.69	30.52	-1.43796	gi|255633528|gb|ACU17122.1|/3.63241e-75/unknown [Glycine max]
Glyma05g31630	6.14	13.7	1.15787	gi|217074458|gb|ACJ85589.1|/0/unknown [Medicago truncatula]								Glyma15g40940	19.63	48.94	1.31795	gi|255647188|gb|ACU24062.1|/8.90607e-127/unknown [Glycine max]								Glyma03g33260	23.47	51.6	1.13655	gi|255647309|gb|ACU24121.1|/1.15861e-91/unknown [Glycine max]		Glyma03g16510	49.49	22.31	-1.14945	gi|255628745|gb|ACU14717.1|/5.22498e-79/unknown [Glycine max]		Glyma01g24650	7.57	22.94	1.5995	gi|255636959|gb|ACU18812.1|/0/unknown [Glycine max]		Glyma09g07170	8.62	3.18	-1.43866	gi|255629337|gb|ACU15013.1|/4.06265e-92/unknown [Glycine max]
Glyma05g08030	11.04	24.56	1.15357	gi|255645088|gb|ACU23043.1|/2.23887e-69/unknown [Glycine max]								Glyma07g16630	9.09	22.64	1.31652	gi|255631416|gb|ACU16075.1|/8.85438e-106/unknown [Glycine max]								Glyma03g03800	17.47	38.35	1.13435	gi|255626431|gb|ACU13560.1|/3.62691e-102/unknown [Glycine max]		Glyma10g40390	37.84	17.08	-1.1476	gi|255639455|gb|ACU20022.1|/0/unknown [Glycine max]		Glyma19g02080	8.62	26.11	1.59884	gi|255638564|gb|ACU19589.1|/0/unknown [Glycine max]		Glyma16g27940	11.96	4.41	-1.43937	gi|255632292|gb|ACU16504.1|/9.92733e-58/unknown [Glycine max]
Glyma07g10070	16.48	36.59	1.15073	gi|255628529|gb|ACU14609.1|/9.14153e-116/unknown [Glycine max]								Glyma10g19480	6.18	15.33	1.31068	gi|255636099|gb|ACU18394.1|/3.27987e-171/unknown [Glycine max]								Glyma06g47830	92.43	202.9	1.13434	gi|255646471|gb|ACU23714.1|/0/unknown [Glycine max]		Glyma08g12880	49.31	22.31	-1.14419	gi|217075809|gb|ACJ86264.1|/6.36099e-137/unknown [Medicago truncatula]		Glyma20g00230	8.62	26.11	1.59884	gi|118486005|gb|ABK94846.1|/0/unknown [Populus trichocarpa]		Glyma07g13710	190.01	70.05	-1.43962	gi|255627809|gb|ACU14249.1|/2.44645e-81/unknown [Glycine max]
Glyma02g31550	12.8	28.4	1.14975	gi|255646280|gb|ACU23624.1|/2.18028e-140/unknown [Glycine max]								Glyma09g41640	5.27	13.06	1.30928	gi|255632669|gb|ACU16686.1|/2.95805e-46/unknown [Glycine max]								Glyma08g15090	14.01	30.68	1.13084	gi|255626663|gb|ACU13676.1|/2.09343e-81/unknown [Glycine max]		Glyma14g38890	39.66	17.95	-1.1437	gi|255641507|gb|ACU21028.1|/1.66978e-80/unknown [Glycine max]		Glyma07g09840	10.73	32.47	1.59746	gi|255646163|gb|ACU23567.1|/6.27449e-155/unknown [Glycine max]		Glyma04g01130	227.49	83.81	-1.44061	gi|255637298|gb|ACU18979.1|/1.81743e-43/unknown [Glycine max]
Glyma04g36930	6.66	14.7	1.14222	gi|255633028|gb|ACU16869.1|/2.49795e-80/unknown [Glycine max]								Glyma05g30200	48.52	120.17	1.30843	gi|255627019|gb|ACU13854.1|/3.84723e-72/unknown [Glycine max]								Glyma01g31990	28.02	61.36	1.13084	gi|255633328|gb|ACU17021.1|/2.76098e-45/unknown [Glycine max]		Glyma09g34770	75.87	34.34	-1.14364	gi|255627471|gb|ACU14080.1|/5.53571e-46/unknown [Glycine max]		Glyma02g43790	52.08	157.03	1.59224	gi|255633900|gb|ACU17311.1|/4.61622e-75/unknown [Glycine max]		Glyma06g17040	13.9	5.12	-1.44087	gi|255631652|gb|ACU16193.1|/1.47708e-63/unknown [Glycine max]
Glyma04g34960	26.65	58.81	1.14193	gi|255627921|gb|ACU14305.1|/1.40649e-49/unknown [Glycine max]								Glyma11g14820	40.52	100.32	1.3079	gi|255640802|gb|ACU20684.1|/0/unknown [Glycine max]								Glyma05g35260	10.19	22.31	1.13054	gi|118489716|gb|ABK96659.1|/1.69522e-172/unknown [Populus trichocarpa x Populus deltoides]		Glyma11g04020	20.01	9.06	-1.14314	gi|255626193|gb|ACU13441.1|/2.21773e-103/unknown [Glycine max]		Glyma10g25620	2.81	8.47	1.59179	gi|255637739|gb|ACU19192.1|/4.8525e-107/unknown [Glycine max]		Glyma03g40130	112.6	41.46	-1.44141	gi|255625645|gb|ACU13167.1|/5.36538e-46/unknown [Glycine max]
Glyma02g38450	24.54	54.13	1.14129	gi|255626107|gb|ACU13398.1|/2.80771e-128/unknown [Glycine max]								Glyma06g02580	4.18	10.28	1.29827	gi|255626893|gb|ACU13791.1|/2.80585e-90/unknown [Glycine max]								Glyma19g34410	16.19	35.39	1.12824	gi|255627917|gb|ACU14303.1|/1.63369e-48/unknown [Glycine max]		Glyma14g40150	16.56	7.5	-1.14274	gi|255639990|gb|ACU20287.1|/8.35255e-148/unknown [Glycine max]		Glyma11g35780	2.46	7.41	1.59082	gi|255632378|gb|ACU16539.1|/7.15666e-20/unknown [Glycine max]		Glyma14g24140	17.77	6.53	-1.44429	gi|217074984|gb|ACJ85852.1|/0/unknown [Medicago truncatula]
Glyma01g02210	8.41	18.54	1.14046	gi|255627087|gb|ACU13888.1|/3.3946e-70/unknown [Glycine max]								Glyma05g09160	13.81	33.96	1.29812	gi|255628443|gb|ACU14566.1|/1.28148e-29/unknown [Glycine max]								Glyma05g24740	60.95	133.18	1.12768	gi|255639401|gb|ACU19996.1|/2.77378e-95/unknown [Glycine max]		Glyma16g33280	100.8	45.67	-1.14218	gi|255644965|gb|ACU22982.1|/9.97825e-153/unknown [Glycine max]		Glyma01g39850	3.34	10.06	1.59071	gi|217073532|gb|ACJ85126.1|/9.43496e-137/unknown [Medicago truncatula]		Glyma06g11890	237.87	87.34	-1.44546	gi|255638809|gb|ACU19708.1|/7.27728e-82/unknown [Glycine max]
Glyma02g15020	32.43	71.34	1.13738	gi|255632689|gb|ACU16696.1|/2.47805e-116/unknown [Glycine max]								Glyma07g37100	10.72	26.3	1.29476	gi|217074538|gb|ACJ85629.1|/0/unknown [Medicago truncatula]								Glyma19g25840	7.82	17.08	1.12707	gi|255633022|gb|ACU16866.1|/9.54778e-50/unknown [Glycine max]		Glyma07g05210	17.28	7.84	-1.14018	gi|255639875|gb|ACU20230.1|/7.50623e-147/unknown [Glycine max]		Glyma04g05460	5.98	18	1.58978	gi|255638904|gb|ACU19754.1|/1.30097e-73/unknown [Glycine max]		Glyma18g14980	227.31	83.46	-1.4455	gi|255627779|gb|ACU14234.1|/4.10623e-49/unknown [Glycine max]
Glyma04g43430	6.31	13.87	1.13626	gi|255627857|gb|ACU14273.1|/3.02475e-89/unknown [Glycine max]								Glyma15g05170	13.99	34.31	1.29423	gi|255636134|gb|ACU18410.1|/5.96537e-38/unknown [Glycine max]								Glyma08g23770	8.55	18.65	1.12518	gi|255641186|gb|ACU20870.1|/0/unknown [Glycine max]		Glyma11g02130	17.65	8.02	-1.13799	gi|255625603|gb|ACU13146.1|/6.98761e-22/unknown [Glycine max]		Glyma08g04590	2.99	9	1.58978	gi|255628125|gb|ACU14407.1|/1.97612e-83/unknown [Glycine max]		Glyma13g22940	69.67	25.58	-1.44552	gi|255628113|gb|ACU14401.1|/1.32035e-76/unknown [Glycine max]
Glyma02g47970	5.78	12.7	1.13569	gi|255628029|gb|ACU14359.1|/2.29141e-91/unknown [Glycine max]								Glyma08g21740	11.08	27.17	1.29406	gi|255640038|gb|ACU20310.1|/2.80776e-176/unknown [Glycine max]								Glyma11g37080	62.59	136.49	1.12479	gi|255638498|gb|ACU19558.1|/4.4326e-122/unknown [Glycine max]		Glyma01g31610	60.41	27.54	-1.13326	gi|255625717|gb|ACU13203.1|/2.32496e-56/unknown [Glycine max]		Glyma10g24340	7.21	21.7	1.58962	gi|255626265|gb|ACU13477.1|/6.96281e-119/unknown [Glycine max]		Glyma08g13360	4434.11	1627.15	-1.4463	gi|255627019|gb|ACU13854.1|/7.95904e-77/unknown [Glycine max]
Glyma11g04330	63.28	139	1.13526	gi|255640576|gb|ACU20573.1|/1.17241e-107/unknown [Glycine max]								Glyma12g09930	8.18	20.03	1.29199	gi|255647989|gb|ACU24451.1|/4.86e-136/unknown [Glycine max]								Glyma04g41660	6	13.07	1.12322	gi|255645249|gb|ACU23122.1|/0/unknown [Glycine max]		Glyma13g10520	23.29	10.63	-1.13157	gi|255631824|gb|ACU16279.1|/1.50605e-49/unknown [Glycine max]		Glyma18g07090	4.75	14.29	1.58901	gi|255631800|gb|ACU16267.1|/1.19799e-130/unknown [Glycine max]		Glyma17g10710	97.64	35.82	-1.44671	gi|255629938|gb|ACU15321.1|/3.85857e-98/unknown [Glycine max]
Glyma06g41610	49.26	107.93	1.13161	gi|255628353|gb|ACU14521.1|/1.52732e-63/unknown [Glycine max]								Glyma20g38960	16.17	39.53	1.28963	gi|255646863|gb|ACU23902.1|/3.75858e-162/unknown [Glycine max]								Glyma10g29170	7.46	16.21	1.11964	gi|255629506|gb|ACU15099.1|/1.0025e-93/unknown [Glycine max]		Glyma01g43420	31.66	14.47	-1.1296	gi|255639279|gb|ACU19938.1|/3.99236e-129/unknown [Glycine max]		Glyma06g07270	9.15	27.52	1.58864	gi|255628181|gb|ACU14435.1|/3.18212e-74/unknown [Glycine max]		Glyma03g35620	45.74	16.76	-1.44843	gi|255640340|gb|ACU20458.1|/2.14717e-83/unknown [Glycine max]
Glyma18g49950	22.44	49.12	1.13024	gi|255627285|gb|ACU13987.1|/2.20803e-60/unknown [Glycine max]								Glyma02g07510	5.63	13.76	1.28927	gi|255645549|gb|ACU23269.1|/0/unknown [Glycine max]								Glyma13g00560	50.4	109.47	1.11904	gi|255625807|gb|ACU13248.1|/1.85216e-54/unknown [Glycine max]		Glyma12g04210	20.2	9.24	-1.12839	gi|255635032|gb|ACU17874.1|/3.20533e-168/unknown [Glycine max]		Glyma08g20840	2.64	7.94	1.5886	gi|255642151|gb|ACU21340.1|/2.81941e-74/unknown [Glycine max]		Glyma09g33070	194.59	71.28	-1.44887	gi|255627099|gb|ACU13894.1|/4.05288e-50/unknown [Glycine max]
Glyma07g04630	72.05	157.55	1.12874	gi|255638786|gb|ACU19697.1|/1.27801e-128/unknown [Glycine max]								Glyma08g03850	4.36	10.62	1.28438	gi|255626845|gb|ACU13767.1|/3.00918e-86/unknown [Glycine max]								Glyma17g08010	8.19	17.78	1.11832	gi|255638877|gb|ACU19741.1|/3.02048e-117/unknown [Glycine max]		Glyma19g26400	45.3	20.74	-1.1271	gi|255646741|gb|ACU23844.1|/3.27776e-84/unknown [Glycine max]		Glyma17g20380	4.93	14.82	1.58789	gi|255629309|gb|ACU14999.1|/2.82381e-29/unknown [Glycine max]		Glyma04g02490	106.97	39.17	-1.44939	gi|255648044|gb|ACU24478.1|/0/unknown [Glycine max]
Glyma19g37830	29.8	65.16	1.12867	gi|255642155|gb|ACU21342.1|/0/unknown [Glycine max]								Glyma12g08750	4.36	10.62	1.28438	gi|255630125|gb|ACU15416.1|/3.84054e-17/unknown [Glycine max]								Glyma07g01330	10.37	22.49	1.11687	gi|255636681|gb|ACU18677.1|/5.60915e-128/unknown [Glycine max]		Glyma17g12610	61.68	28.24	-1.12706	gi|255629269|gb|ACU14979.1|/3.78591e-38/unknown [Glycine max]		Glyma16g32990	18.3	54.87	1.58417	gi|255647671|gb|ACU24297.1|/1.04478e-152/unknown [Glycine max]		Glyma02g18260	9.15	3.35	-1.44961	gi|255631898|gb|ACU16316.1|/9.24529e-43/unknown [Glycine max]
Glyma11g12480	7.36	16.04	1.1239	gi|255625591|gb|ACU13140.1|/2.73849e-43/unknown [Glycine max]								Glyma14g27330	4.36	10.62	1.28438	gi|255639820|gb|ACU20203.1|/0/unknown [Glycine max]								Glyma14g40620	49.85	108.08	1.11643	gi|255639963|gb|ACU20274.1|/0/unknown [Glycine max]		Glyma11g19680	12.92	5.93	-1.1235	gi|255646157|gb|ACU23564.1|/7.71273e-171/unknown [Glycine max]		Glyma11g08190	29.38	88.04	1.58332	gi|255633852|gb|ACU17287.1|/3.21333e-79/unknown [Glycine max]		Glyma01g43710	68.44	25.05	-1.45003	gi|255631742|gb|ACU16238.1|/2.15132e-71/unknown [Glycine max]
Glyma20g23510	10.87	23.56	1.11599	gi|255648097|gb|ACU24503.1|/3.77823e-96/unknown [Glycine max]								Glyma20g21200	4.36	10.62	1.28438	gi|255639364|gb|ACU19978.1|/3.99925e-169/unknown [Glycine max]								Glyma10g27980	167.03	362.05	1.11608	gi|255645771|gb|ACU23378.1|/6.28975e-144/unknown [Glycine max]		Glyma08g46900	13.28	6.1	-1.12237	gi|118486134|gb|ABK94910.1|/1.60004e-118/unknown [Populus trichocarpa]		Glyma18g17590	21.99	65.81	1.58146	gi|255626905|gb|ACU13797.1|/3.64559e-40/unknown [Glycine max]		Glyma05g34920	16.89	6.18	-1.45049	gi|255635560|gb|ACU18130.1|/1.99314e-163/unknown [Glycine max]
Glyma15g08120	39.79	86.21	1.11545	gi|255642582|gb|ACU21554.1|/5.42812e-172/unknown [Glycine max]								Glyma14g06720	4.72	11.49	1.28352	gi|255626189|gb|ACU13439.1|/1.43492e-99/unknown [Glycine max]								Glyma08g47150	16.01	34.69	1.11555	gi|255639737|gb|ACU20162.1|/1.29114e-91/unknown [Glycine max]		Glyma08g32760	22.38	10.28	-1.12237	gi|255641563|gb|ACU21055.1|/5.68163e-36/unknown [Glycine max]		Glyma16g31250	63.34	189.5	1.58101	gi|255645959|gb|ACU23468.1|/5.04012e-116/unknown [Glycine max]		Glyma10g33990	24.63	9	-1.45242	gi|255627971|gb|ACU14330.1|/2.81399e-117/unknown [Glycine max]
Glyma09g20290	9.29	20.05	1.10985	gi|255627447|gb|ACU14068.1|/2.39304e-98/unknown [Glycine max]								Glyma06g17680	6.54	15.85	1.27712	gi|255635024|gb|ACU17870.1|/1.02599e-86/unknown [Glycine max]								Glyma10g38080	8.37	18.13	1.11508	gi|255625713|gb|ACU13201.1|/4.85315e-103/unknown [Glycine max]		Glyma15g14280	13.65	6.28	-1.12006	gi|255628393|gb|ACU14541.1|/1.10278e-80/unknown [Glycine max]		Glyma13g20600	9.5	28.41	1.5804	gi|255630065|gb|ACU15386.1|/1.69236e-24/unknown [Glycine max]		Glyma01g41210	66.15	24.17	-1.45252	gi|255627121|gb|ACU13905.1|/8.91075e-48/unknown [Glycine max]
Glyma03g17950	22.79	49.12	1.10791	gi|255641168|gb|ACU20861.1|/0/unknown [Glycine max]								Glyma17g13600	60.51	146.64	1.27703	gi|255635129|gb|ACU17921.1|/0/unknown [Glycine max]								Glyma10g43090	23.83	51.6	1.11459	gi|255638031|gb|ACU19330.1|/2.44489e-64/unknown [Glycine max]		Glyma18g43070	18.56	8.54	-1.11989	gi|255626157|gb|ACU13423.1|/1.43801e-115/unknown [Glycine max]		Glyma14g29120	121.75	362.06	1.57231	gi|255637316|gb|ACU18988.1|/6.35764e-56/unknown [Glycine max]		Glyma13g00780	61.4	22.41	-1.4541	gi|255635586|gb|ACU18143.1|/7.35705e-169/unknown [Glycine max]
Glyma05g01850	178.45	384.09	1.10592	gi|255628227|gb|ACU14458.1|/8.83797e-50/unknown [Glycine max]								Glyma18g52980	42.88	103.8	1.27543	gi|255646496|gb|ACU23726.1|/7.46764e-95/unknown [Glycine max]								Glyma11g28420	6.37	13.77	1.11216	gi|255636637|gb|ACU18656.1|/2.86256e-49/unknown [Glycine max]		Glyma10g30340	28.38	13.07	-1.11862	gi|255630943|gb|ACU15834.1|/1.04766e-115/unknown [Glycine max]		Glyma15g13230	5.28	15.7	1.57215	gi|217075472|gb|ACJ86096.1|/5.16453e-110/unknown [Medicago truncatula]		Glyma04g07270	9.68	3.53	-1.45534	gi|255548980|ref|XP_002515546.1|/2.4915e-58/protein with unknown function [Ricinus communis]
Glyma01g36620	38.74	83.2	1.10276	gi|255627141|gb|ACU13915.1|/2.7532e-99/unknown [Glycine max]								Glyma15g01990	4.54	10.97	1.2728	gi|255640548|gb|ACU20559.1|/5.36325e-97/unknown [Glycine max]								Glyma09g38340	13.28	28.59	1.10626	gi|255634458|gb|ACU17594.1|/0/unknown [Glycine max]		Glyma05g28410	23.47	10.81	-1.11845	gi|255629962|gb|ACU15333.1|/3.94247e-66/unknown [Glycine max]		Glyma08g45300	168.19	499.33	1.5699	gi|255631336|gb|ACU16035.1|/1.28031e-18/unknown [Glycine max]		Glyma07g32150	31.49	11.47	-1.45703	gi|255644967|gb|ACU22983.1|/3.70416e-89/unknown [Glycine max]
Glyma14g05350	60.3	129.14	1.09871	gi|255639863|gb|ACU20224.1|/2.51941e-159/unknown [Glycine max]								Glyma17g38120	13.99	33.79	1.2722	gi|217074450|gb|ACJ85585.1|/0/unknown [Medicago truncatula]								Glyma13g36520	10.37	22.31	1.10527	gi|255647456|gb|ACU24192.1|/0/unknown [Glycine max]		Glyma04g08190	29.48	13.6	-1.11613	gi|255634977|gb|ACU17847.1|/3.81198e-126/unknown [Glycine max]		Glyma12g34840	8.09	24	1.56882	gi|255635528|gb|ACU18115.1|/0/unknown [Glycine max]		Glyma11g37820	23.75	8.65	-1.45716	gi|255634863|gb|ACU17790.1|/0/unknown [Glycine max]
Glyma12g09930	13.5	28.9	1.09811	gi|255647989|gb|ACU24451.1|/4.86e-136/unknown [Glycine max]								Glyma10g29190	10.54	25.43	1.27066	gi|255628335|gb|ACU14512.1|/2.14974e-72/unknown [Glycine max]								Glyma10g44480	10.73	23.01	1.10061	gi|255637879|gb|ACU19258.1|/3.02804e-158/unknown [Glycine max]		Glyma19g06470	15.1	6.97	-1.11532	gi|255648281|gb|ACU24593.1|/0/unknown [Glycine max]		Glyma14g36540	15.13	44.82	1.56673	gi|255635250|gb|ACU17979.1|/0/unknown [Glycine max]		Glyma03g00370	14.07	5.12	-1.45841	gi|255637373|gb|ACU19015.1|/3.37398e-145/unknown [Glycine max]
Glyma02g07150	51.36	109.93	1.09787	gi|255632206|gb|ACU16461.1|/6.7647e-137/unknown [Glycine max]								Glyma07g03610	27.44	66.18	1.27011	gi|118489311|gb|ABK96460.1|/9.34579e-77/unknown [Populus trichocarpa x Populus deltoides]								Glyma02g15640	31.48	67.46	1.0996	gi|255639195|gb|ACU19896.1|/0/unknown [Glycine max]		Glyma13g05810	81.88	37.83	-1.11398	gi|255625927|gb|ACU13308.1|/5.77346e-79/unknown [Glycine max]		Glyma11g05940	7.57	22.41	1.56578	gi|217074298|gb|ACJ85509.1|/7.32278e-177/unknown [Medicago truncatula]		Glyma02g35210	8.27	3	-1.46292	gi|255638894|gb|ACU19749.1|/1.75121e-121/unknown [Glycine max]
Glyma20g32770	14.37	30.74	1.09706	gi|255637996|gb|ACU19314.1|/4.94161e-87/unknown [Glycine max]								Glyma20g02250	21.81	52.6	1.27007	gi|255627187|gb|ACU13938.1|/3.69838e-80/unknown [Glycine max]								Glyma06g13750	9.28	19.87	1.0984	gi|255629049|gb|ACU14869.1|/4.39405e-92/unknown [Glycine max]		Glyma18g53730	28.57	13.25	-1.10851	gi|255627753|gb|ACU14221.1|/1.15168e-47/unknown [Glycine max]		Glyma11g19840	43.28	128.1	1.5655	gi|217071848|gb|ACJ84284.1|/2.66883e-82/unknown [Medicago truncatula]		Glyma03g03500	8.27	3	-1.46292	gi|255646070|gb|ACU23522.1|/5.71978e-120/unknown [Glycine max]
Glyma08g11070	50.66	108.26	1.09558	gi|255640724|gb|ACU20646.1|/1.44449e-66/unknown [Glycine max]								Glyma14g05590	4.91	11.84	1.26987	gi|255641286|gb|ACU20920.1|/0/unknown [Glycine max]								Glyma14g11700	11.28	24.06	1.09287	gi|255635795|gb|ACU18246.1|/0/unknown [Glycine max]		Glyma11g04970	29.66	13.77	-1.10699	gi|255630653|gb|ACU15686.1|/3.3053e-71/unknown [Glycine max]		Glyma16g25840	2.81	8.29	1.5608	gi|217073498|gb|ACJ85109.1|/3.30655e-35/unknown [Medicago truncatula]		Glyma13g19470	20.94	7.59	-1.46409	gi|255626177|gb|ACU13433.1|/2.7006e-52/unknown [Glycine max]
Glyma05g36020	25.07	53.46	1.0925	gi|255640082|gb|ACU20332.1|/4.86477e-138/unknown [Glycine max]								Glyma04g09500	18.35	44.24	1.26957	gi|255627527|gb|ACU14108.1|/5.3881e-102/unknown [Glycine max]								Glyma08g07900	44.39	94.65	1.09237	gi|255647202|gb|ACU24069.1|/1.24563e-82/unknown [Glycine max]		Glyma15g15680	47.67	22.14	-1.10643	gi|255629199|gb|ACU14944.1|/9.57965e-76/unknown [Glycine max]		Glyma11g37810	5.81	17.11	1.55823	gi|255628887|gb|ACU14788.1|/4.44626e-56/unknown [Glycine max]		Glyma08g12150	8.8	3.18	-1.46848	gi|255636168|gb|ACU18426.1|/0/unknown [Glycine max]
Glyma13g20830	28.22	59.98	1.08776	gi|255639723|gb|ACU20155.1|/1.3468e-125/unknown [Glycine max]								Glyma09g30370	12.17	29.26	1.2656	gi|255635501|gb|ACU18102.1|/7.70886e-162/unknown [Glycine max]								Glyma15g13550	645.91	1366.63	1.08122	gi|255642477|gb|ACU21502.1|/0/unknown [Glycine max]		Glyma16g04810	36.39	16.91	-1.10567	gi|255626271|gb|ACU13480.1|/6.23629e-65/unknown [Glycine max]		Glyma19g04610	10.56	31.05	1.55598	gi|255647829|gb|ACU24374.1|/0/unknown [Glycine max]		Glyma13g23470	11.26	4.06	-1.47166	gi|217073634|gb|ACJ85177.1|/9.12906e-53/unknown [Medicago truncatula]
Glyma20g24860	14.55	30.91	1.08705	gi|255647126|gb|ACU24031.1|/1.92157e-81/unknown [Glycine max]								Glyma04g40580	4.72	11.32	1.26202	gi|255644467|gb|ACU22737.1|/0/unknown [Glycine max]								Glyma13g28620	8.92	18.83	1.07792	gi|118486104|gb|ABK94895.1|/2.6487e-134/unknown [Populus trichocarpa]		Glyma04g37120	345.51	160.72	-1.10418	gi|255627339|gb|ACU14014.1|/8.8284e-78/unknown [Glycine max]		Glyma20g35490	7.04	20.64	1.5518	gi|255638334|gb|ACU19479.1|/0/unknown [Glycine max]		Glyma11g37320	18.12	6.53	-1.47243	gi|255638092|gb|ACU19360.1|/6.55414e-165/unknown [Glycine max]
Glyma16g34570	9.99	21.22	1.08687	gi|255646947|gb|ACU23943.1|/0/unknown [Glycine max]								Glyma06g44810	13.45	32.22	1.26035	gi|255632402|gb|ACU16551.1|/8.68388e-108/unknown [Glycine max]								Glyma10g34750	13.65	28.76	1.07516	gi|255631366|gb|ACU16050.1|/2.69696e-63/unknown [Glycine max]		Glyma14g05630	19.1	8.89	-1.10332	gi|255630933|gb|ACU15829.1|/7.67831e-69/unknown [Glycine max]		Glyma05g25910	30.96	90.69	1.55054	gi|255636550|gb|ACU18613.1|/1.67004e-150/unknown [Glycine max]		Glyma10g30350	76.88	27.7	-1.47272	gi|255626791|gb|ACU13740.1|/1.35898e-95/unknown [Glycine max]
Glyma03g14780	26.29	55.8	1.08575	gi|255635380|gb|ACU18043.1|/6.0366e-165/unknown [Glycine max]								Glyma12g08470	5.63	13.41	1.2521	gi|255630246|gb|ACU15478.1|/1.66311e-90/unknown [Glycine max]								Glyma13g20650	21.65	45.5	1.0715	gi|255631886|gb|ACU16310.1|/1.8173e-55/unknown [Glycine max]		Glyma07g05940	19.83	9.24	-1.10172	gi|255633478|gb|ACU17097.1|/2.69601e-89/unknown [Glycine max]		Glyma16g10750	33.25	97.22	1.5479	gi|255628081|gb|ACU14385.1|/4.76975e-75/unknown [Glycine max]		Glyma07g27820	13.72	4.94	-1.4737	gi|255645596|gb|ACU23292.1|/3.91315e-86/unknown [Glycine max]
Glyma11g13060	8.59	18.21	1.084	gi|255626673|gb|ACU13681.1|/1.49564e-80/unknown [Glycine max]								Glyma07g32960	7.63	18.11	1.24703	gi|255637424|gb|ACU19040.1|/8.58697e-78/unknown [Glycine max]								Glyma17g17800	147.92	310.8	1.07117	gi|255626773|gb|ACU13731.1|/5.58622e-34/unknown [Glycine max]		Glyma08g45450	13.83	6.45	-1.10043	gi|255641835|gb|ACU21186.1|/1.85148e-150/unknown [Glycine max]		Glyma07g35080	11.96	34.94	1.54666	gi|255636077|gb|ACU18383.1|/8.1591e-132/unknown [Glycine max]		Glyma06g07510	34.31	12.35	-1.47412	gi|255628199|gb|ACU14444.1|/1.93749e-62/unknown [Glycine max]
Glyma20g33800	18.23	38.59	1.08191	gi|255627625|gb|ACU14157.1|/7.21263e-113/unknown [Glycine max]								Glyma08g06200	8.9	21.07	1.24331	gi|255630206|gb|ACU15458.1|/2.60764e-36/unknown [Glycine max]								Glyma07g08650	8.55	17.95	1.06999	gi|217071738|gb|ACJ84229.1|/2.87949e-165/unknown [Medicago truncatula]		Glyma17g04810	13.83	6.45	-1.10043	gi|255640981|gb|ACU20770.1|/5.75653e-155/unknown [Glycine max]		Glyma19g35630	84.1	245.43	1.54513	gi|217071888|gb|ACJ84304.1|/8.79751e-151/unknown [Medicago truncatula]		Glyma06g03690	9.32	3.35	-1.47617	gi|255628599|gb|ACU14644.1|/3.26205e-97/unknown [Glycine max]
Glyma02g36870	17.53	37.09	1.0812	gi|255634953|gb|ACU17835.1|/6.42225e-120/unknown [Glycine max]								Glyma17g11670	7.45	17.59	1.23944	gi|255640173|gb|ACU20377.1|/0/unknown [Glycine max]								Glyma07g12400	8.55	17.95	1.06999	gi|255632713|gb|ACU16708.1|/3.71641e-73/unknown [Glycine max]		Glyma01g32040	20.56	9.59	-1.10024	gi|255631736|gb|ACU16235.1|/3.42844e-104/unknown [Glycine max]		Glyma11g13270	3.69	10.76	1.54399	gi|255631536|gb|ACU16135.1|/2.15348e-129/unknown [Glycine max]		Glyma09g06700	24.1	8.65	-1.47826	gi|217075296|gb|ACJ86008.1|/1.00801e-37/unknown [Medicago truncatula]
Glyma10g04220	65.39	138.33	1.08097	gi|255631610|gb|ACU16172.1|/3.13052e-31/unknown [Glycine max]								Glyma02g08050	16.9	39.71	1.23248	gi|255640183|gb|ACU20382.1|/5.51348e-127/unknown [Glycine max]								Glyma05g03660	14.37	30.16	1.06958	gi|255647867|gb|ACU24392.1|/1.17737e-111/unknown [Glycine max]		Glyma11g07690	16.01	7.5	-1.09401	gi|255630095|gb|ACU15401.1|/1.65904e-58/unknown [Glycine max]		Glyma15g18610	5.45	15.88	1.54288	gi|255627125|gb|ACU13907.1|/1.20818e-62/unknown [Glycine max]		Glyma16g01220	11.79	4.23	-1.47883	gi|255648117|gb|ACU24513.1|/5.29874e-118/unknown [Glycine max]
Glyma13g32050	12.45	26.23	1.07507	gi|255640215|gb|ACU20398.1|/1.22321e-74/unknown [Glycine max]								Glyma10g23460	7.27	17.07	1.23144	gi|255630488|gb|ACU15602.1|/3.62979e-126/unknown [Glycine max]								Glyma15g00900	42.76	89.6	1.06724	gi|255644244|gb|ACU22686.1|/1.04064e-146/unknown [Glycine max]		Glyma11g08050	42.39	19.87	-1.09313	gi|255639237|gb|ACU19917.1|/2.88491e-137/unknown [Glycine max]		Glyma13g02230	7.21	21	1.54232	gi|255629990|gb|ACU15347.1|/2.87193e-40/unknown [Glycine max]		Glyma09g24070	96.24	34.41	-1.48381	gi|255631306|gb|ACU16020.1|/3.11217e-87/unknown [Glycine max]
Glyma02g42170	17.53	36.92	1.07458	gi|255625849|gb|ACU13269.1|/7.306e-90/unknown [Glycine max]								Glyma04g08610	6.54	15.33	1.229	gi|255638666|gb|ACU19638.1|/8.70881e-88/unknown [Glycine max]								Glyma13g35510	22.56	47.24	1.06624	gi|255626185|gb|ACU13437.1|/7.73064e-95/unknown [Glycine max]		Glyma16g03410	342.42	160.72	-1.09122	gi|255642837|gb|ACU22605.1|/2.22697e-109/unknown [Glycine max]		Glyma02g08740	18.12	52.58	1.53693	gi|255631342|gb|ACU16038.1|/2.44986e-61/unknown [Glycine max]		Glyma10g39750	50.85	18.17	-1.48469	gi|255641270|gb|ACU20912.1|/5.00334e-167/unknown [Glycine max]
Glyma09g02900	38.04	80.03	1.07302	gi|255639588|gb|ACU20088.1|/0/unknown [Glycine max]								Glyma08g26070	45.79	107.11	1.22599	gi|255626747|gb|ACU13718.1|/1.16491e-40/unknown [Glycine max]								Glyma10g34370	11.83	24.75	1.06498	gi|255647912|gb|ACU24414.1|/0/unknown [Glycine max]		Glyma13g27530	17.83	8.37	-1.09101	gi|255647214|gb|ACU24075.1|/1.19634e-08/unknown [Glycine max]		Glyma13g31270	4.75	13.76	1.53448	gi|255626237|gb|ACU13463.1|/6.30843e-75/unknown [Glycine max]		Glyma09g34760	108.73	38.82	-1.48588	gi|255625667|gb|ACU13178.1|/8.10632e-137/unknown [Glycine max]
Glyma05g23220	102.72	216.02	1.07245	gi|255631866|gb|ACU16300.1|/6.70561e-57/unknown [Glycine max]								Glyma20g35000	41.79	97.7	1.2252	gi|255627611|gb|ACU14150.1|/1.87931e-61/unknown [Glycine max]								Glyma16g34750	14.01	29.28	1.06346	gi|255637478|gb|ACU19066.1|/1.46009e-147/unknown [Glycine max]		Glyma15g14760	32.57	15.34	-1.08625	gi|255631310|gb|ACU16022.1|/2.0896e-55/unknown [Glycine max]		Glyma17g36830	4.75	13.76	1.53448	gi|255634412|gb|ACU17571.1|/4.2139e-08/unknown [Glycine max]		Glyma04g43180	15.83	5.65	-1.48634	gi|255636609|gb|ACU18642.1|/0/unknown [Glycine max]
Glyma08g01940	8.24	17.21	1.06253	gi|255633122|gb|ACU16916.1|/7.68256e-87/unknown [Glycine max]								Glyma19g39370	17.99	41.97	1.22216	gi|255640068|gb|ACU20325.1|/0/unknown [Glycine max]								Glyma10g00360	12.01	25.1	1.06345	gi|255629011|gb|ACU14850.1|/1.77026e-64/unknown [Glycine max]		Glyma16g29650	532.55	250.84	-1.08615	gi|255632914|gb|ACU16811.1|/1.05891e-52/unknown [Glycine max]		Glyma10g33490	5.98	17.29	1.53172	gi|255631638|gb|ACU16186.1|/1.2326e-91/unknown [Glycine max]		Glyma03g31060	49.97	17.82	-1.48756	gi|217074300|gb|ACJ85510.1|/1.18902e-147/unknown [Medicago truncatula]
Glyma16g08440	7.36	15.37	1.06234	gi|255626419|gb|ACU13554.1|/1.55402e-67/unknown [Glycine max]								Glyma20g21520	123.2	287.36	1.22186	gi|255647319|gb|ACU24126.1|/1.3691e-66/unknown [Glycine max]								Glyma13g20330	37.12	77.57	1.0633	gi|255647178|gb|ACU24057.1|/4.97373e-86/unknown [Glycine max]		Glyma11g12810	322.95	152.18	-1.08553	gi|255633155|gb|ACU16933.1|/2.86407e-57/unknown [Glycine max]		Glyma08g24840	4.4	12.7	1.52925	gi|255638837|gb|ACU19722.1|/3.8191e-123/unknown [Glycine max]		Glyma02g47120	7.92	2.82	-1.48981	gi|255639043|gb|ACU19822.1|/2.96536e-154/unknown [Glycine max]
Glyma12g10810	21.39	44.44	1.05492	gi|255637282|gb|ACU18971.1|/2.07207e-59/unknown [Glycine max]								Glyma08g45300	189.53	441.85	1.22113	gi|255631336|gb|ACU16035.1|/1.28031e-18/unknown [Glycine max]								Glyma11g06030	8.01	16.73	1.06256	gi|255637247|gb|ACU18954.1|/4.24961e-89/unknown [Glycine max]		Glyma20g35490	13.65	6.45	-1.08153	gi|255638334|gb|ACU19479.1|/0/unknown [Glycine max]		Glyma04g13160	12.84	37.05	1.52883	gi|255646296|gb|ACU23632.1|/6.58853e-103/unknown [Glycine max]		Glyma14g07690	127.38	45.35	-1.48996	gi|255628731|gb|ACU14710.1|/1.25653e-57/unknown [Glycine max]
Glyma02g40670	6.84	14.2	1.05382	gi|255636220|gb|ACU18451.1|/1.65972e-60/unknown [Glycine max]								Glyma19g36990	33.44	77.85	1.21912	gi|255645535|gb|ACU23262.1|/3.00815e-161/unknown [Glycine max]								Glyma20g26960	8.01	16.73	1.06256	gi|255645545|gb|ACU23267.1|/0/unknown [Glycine max]		Glyma14g06820	135.73	64.15	-1.08122	gi|255626245|gb|ACU13467.1|/2.55963e-60/unknown [Glycine max]		Glyma15g08450	4.22	12.17	1.52801	gi|255640139|gb|ACU20360.1|/4.27697e-166/unknown [Glycine max]		Glyma09g38990	18.83	6.7	-1.4908	gi|255642519|gb|ACU21523.1|/1.52693e-79/unknown [Glycine max]
Glyma12g04880	147.07	302.9	1.04234	gi|255632458|gb|ACU16579.1|/2.11834e-111/unknown [Glycine max]								Glyma13g31180	11.08	25.78	1.21829	gi|255626481|gb|ACU13585.1|/1.18544e-67/unknown [Glycine max]								Glyma17g34940	14.19	29.63	1.06218	gi|255633082|gb|ACU16896.1|/6.33006e-95/unknown [Glycine max]		Glyma19g40080	103.53	48.98	-1.07978	gi|255632494|gb|ACU16597.1|/8.71608e-93/unknown [Glycine max]		Glyma20g02250	13.72	39.35	1.52008	gi|255627187|gb|ACU13938.1|/3.69838e-80/unknown [Glycine max]		Glyma05g37420	10.91	3.88	-1.49152	gi|255633316|gb|ACU17015.1|/3.3533e-43/unknown [Glycine max]
Glyma08g46120	7.89	16.21	1.03879	gi|255635974|gb|ACU18333.1|/6.06374e-105/unknown [Glycine max]								Glyma0048s00300	29.44	68.45	1.21727	gi|255646517|gb|ACU23736.1|/0/unknown [Glycine max]								Glyma04g12240	18.38	38.35	1.06109	gi|255626225|gb|ACU13457.1|/6.63029e-69/unknown [Glycine max]		Glyma19g06450	30.93	14.64	-1.07909	gi|255625985|gb|ACU13337.1|/1.69662e-69/unknown [Glycine max]		Glyma13g16640	9.85	28.23	1.51903	gi|255635451|gb|ACU18078.1|/4.55077e-161/unknown [Glycine max]		Glyma06g16410	33.25	11.82	-1.49212	gi|255627911|gb|ACU14300.1|/1.97591e-42/unknown [Glycine max]
Glyma17g10910	21.91	44.94	1.03641	gi|255632430|gb|ACU16565.1|/8.51285e-45/unknown [Glycine max]								Glyma17g09160	24.89	57.82	1.216	gi|255635007|gb|ACU17862.1|/8.12446e-91/unknown [Glycine max]								Glyma14g08170	12.55	26.15	1.05912	gi|255647743|gb|ACU24332.1|/7.1822e-158/unknown [Glycine max]		Glyma07g35230	30.93	14.64	-1.07909	gi|255639201|gb|ACU19899.1|/1.44247e-48/unknown [Glycine max]		Glyma10g26220	5.98	17.11	1.51662	gi|255630137|gb|ACU15422.1|/2.63212e-26/unknown [Glycine max]		Glyma07g13730	41.7	14.82	-1.4925	gi|255626499|gb|ACU13594.1|/1.2748e-83/unknown [Glycine max]
Glyma18g48370	7.01	14.37	1.03557	gi|255640137|gb|ACU20359.1|/3.33384e-157/unknown [Glycine max]								Glyma04g03920	6.54	15.15	1.21196	gi|255636523|gb|ACU18600.1|/6.82833e-115/unknown [Glycine max]								Glyma17g17040	9.46	19.7	1.05828	gi|255640066|gb|ACU20324.1|/5.83133e-133/unknown [Glycine max]		Glyma07g04630	128.09	60.84	-1.07407	gi|255638786|gb|ACU19697.1|/1.27801e-128/unknown [Glycine max]		Glyma11g02750	3.52	10.06	1.51498	gi|255639642|gb|ACU20115.1|/8.48335e-138/unknown [Glycine max]		Glyma06g20960	25.33	9	-1.49285	gi|217073418|gb|ACJ85068.1|/2.93548e-133/unknown [Medicago truncatula]
Glyma06g08100	85.02	174.25	1.03528	gi|255644870|gb|ACU22935.1|/2.86646e-91/unknown [Glycine max]								Glyma14g33210	32.53	75.24	1.20973	gi|255630343|gb|ACU15528.1|/8.38962e-41/unknown [Glycine max]								Glyma16g24270	20.38	42.36	1.05555	gi|255645752|gb|ACU23369.1|/0/unknown [Glycine max]		Glyma08g46630	27.11	12.9	-1.07145	gi|255647188|gb|ACU24062.1|/6.12017e-154/unknown [Glycine max]		Glyma19g40960	3.52	10.06	1.51498	gi|255647887|gb|ACU24402.1|/3.25448e-164/unknown [Glycine max]		Glyma17g05760	324.6	115.04	-1.49653	gi|255637243|gb|ACU18952.1|/7.89487e-88/unknown [Glycine max]
Glyma20g39160	12.97	26.56	1.03408	gi|255636715|gb|ACU18693.1|/3.82233e-164/unknown [Glycine max]								Glyma19g33580	10.18	23.51	1.20754	gi|255645223|gb|ACU23109.1|/9.65263e-137/unknown [Glycine max]								Glyma08g35470	19.29	40.09	1.05539	gi|255630875|gb|ACU15800.1|/3.01093e-120/unknown [Glycine max]		Glyma13g37600	73.51	35.04	-1.06894	gi|255628293|gb|ACU14491.1|/1.20089e-22/unknown [Glycine max]		Glyma03g07550	6.86	19.59	1.51384	gi|255632840|gb|ACU16773.1|/3.13476e-109/unknown [Glycine max]		Glyma06g13720	29.38	10.41	-1.49686	gi|255626117|gb|ACU13403.1|/3.36597e-94/unknown [Glycine max]
Glyma12g06540	36.64	75.01	1.03366	gi|255635068|gb|ACU17892.1|/3.62745e-125/unknown [Glycine max]								Glyma06g16360	5.81	13.41	1.2067	gi|255635060|gb|ACU17888.1|/9.41498e-85/unknown [Glycine max]								Glyma17g37730	24.93	51.77	1.05423	gi|255628845|gb|ACU14767.1|/2.84859e-76/unknown [Glycine max]		Glyma04g01130	571.49	272.98	-1.06593	gi|255637298|gb|ACU18979.1|/1.81743e-43/unknown [Glycine max]		Glyma17g07100	14.6	41.64	1.512	gi|255639364|gb|ACU19978.1|/7.16641e-161/unknown [Glycine max]		Glyma13g19500	32.9	11.65	-1.49776	gi|255632298|gb|ACU16507.1|/6.9899e-99/unknown [Glycine max]
Glyma08g47040	19.28	39.43	1.03219	gi|255648379|gb|ACU24640.1|/6.49861e-71/unknown [Glycine max]								Glyma01g45520	6.72	15.5	1.20574	gi|255636278|gb|ACU18479.1|/7.37181e-155/unknown [Glycine max]								Glyma08g23680	20.01	41.49	1.05204	gi|255644601|gb|ACU22803.1|/0/unknown [Glycine max]		Glyma10g42190	13.83	6.62	-1.0629	gi|255645090|gb|ACU23044.1|/2.43966e-109/unknown [Glycine max]		Glyma11g11370	24.1	68.64	1.51002	gi|255637629|gb|ACU19139.1|/3.64397e-100/unknown [Glycine max]		Glyma14g06630	231.88	82.05	-1.4988	gi|255641162|gb|ACU20858.1|/2.2455e-155/unknown [Glycine max]
Glyma13g33370	9.82	20.05	1.02981	gi|255646248|gb|ACU23608.1|/1.05969e-81/unknown [Glycine max]								Glyma13g38720	7.63	17.59	1.205	gi|255637379|gb|ACU19018.1|/7.71164e-172/unknown [Glycine max]								Glyma16g25850	7.82	16.21	1.05164	gi|255627885|gb|ACU14287.1|/1.09605e-71/unknown [Glycine max]		Glyma10g06450	14.56	6.97	-1.06278	gi|255631886|gb|ACU16310.1|/4.03731e-60/unknown [Glycine max]		Glyma18g04470	6.33	18	1.50772	gi|255627881|gb|ACU14285.1|/3.58424e-86/unknown [Glycine max]		Glyma16g06410	48.91	17.29	-1.50019	gi|217072076|gb|ACJ84398.1|/1.87378e-102/unknown [Medicago truncatula]
Glyma13g31230	15.6	31.74	1.02476	gi|255639800|gb|ACU20193.1|/1.86446e-175/unknown [Glycine max]								Glyma02g35630	40.7	93.35	1.19762	gi|255647490|gb|ACU24209.1|/3.00177e-78/unknown [Glycine max]								Glyma01g35130	51.31	106.16	1.04893	gi|217075711|gb|ACJ86215.1|/4.39918e-101/unknown [Medicago truncatula]		Glyma20g03100	28.02	13.42	-1.06207	gi|255639201|gb|ACU19899.1|/1.418e-41/unknown [Glycine max]		Glyma20g29460	7.39	21	1.50674	gi|255636874|gb|ACU18770.1|/4.4434e-170/unknown [Glycine max]		Glyma09g32440	21.99	7.76	-1.50272	gi|255646042|gb|ACU23508.1|/1.04329e-144/unknown [Glycine max]
Glyma15g20970	395.12	801.93	1.02119	gi|255625685|gb|ACU13187.1|/6.4965e-100/unknown [Glycine max]								Glyma08g39880	6	13.76	1.19745	gi|255638486|gb|ACU19552.1|/6.47704e-135/unknown [Glycine max]								Glyma16g33230	17.28	35.73	1.04803	gi|255637340|gb|ACU19000.1|/2.00642e-127/unknown [Glycine max]		Glyma06g08430	43.3	20.74	-1.06195	gi|255642485|gb|ACU21506.1|/0/unknown [Glycine max]		Glyma0048s00290	11.96	33.88	1.50222	gi|255644876|gb|ACU22938.1|/1.73643e-167/unknown [Glycine max]		Glyma08g44410	25.51	9	-1.50307	gi|255645473|gb|ACU23232.1|/9.05378e-135/unknown [Glycine max]
Glyma11g04590	9.47	19.21	1.02042	gi|255637627|gb|ACU19138.1|/1.89685e-73/unknown [Glycine max]								Glyma14g08170	14.9	34.14	1.19615	gi|255647743|gb|ACU24332.1|/7.1822e-158/unknown [Glycine max]								Glyma06g14170	8.19	16.91	1.04594	gi|15238541|ref|NP_197834.1|/1.18735e-64/unknown protein [Arabidopsis thaliana]		Glyma18g25820	16.01	7.67	-1.06167	gi|255628635|gb|ACU14662.1|/1.6117e-67/unknown [Glycine max]		Glyma15g01020	4.05	11.47	1.50187	gi|255632396|gb|ACU16548.1|/9.0201e-117/unknown [Glycine max]		Glyma11g01770	35.54	12.53	-1.50406	gi|255631742|gb|ACU16238.1|/2.85983e-80/unknown [Glycine max]
Glyma07g07170	15.08	30.57	1.01948	gi|255627043|gb|ACU13866.1|/8.39975e-32/unknown [Glycine max]								Glyma06g48350	11.27	25.78	1.19376	gi|255632920|gb|ACU16814.1|/4.22018e-48/unknown [Glycine max]								Glyma11g04520	14.19	29.28	1.04504	gi|255629926|gb|ACU15315.1|/2.25996e-15/unknown [Glycine max]		Glyma04g06280	22.56	10.81	-1.0614	gi|21592409|gb|AAM64360.1|/5.8252e-113/unknown [Arabidopsis thaliana]		Glyma01g00720	9.85	27.88	1.50103	gi|255546211|ref|XP_002514165.1|/6.73845e-76/protein with unknown function [Ricinus communis]		Glyma04g08610	13.02	4.59	-1.50416	gi|255638666|gb|ACU19638.1|/8.70881e-88/unknown [Glycine max]
Glyma07g29670	65.39	132.49	1.01874	gi|255645013|gb|ACU23006.1|/0/unknown [Glycine max]								Glyma02g47910	11.45	26.12	1.18981	gi|255646897|gb|ACU23918.1|/2.95419e-61/unknown [Glycine max]								Glyma19g39570	80.6	166.3	1.04494	gi|255631934|gb|ACU16334.1|/1.44197e-93/unknown [Glycine max]		Glyma11g06430	14.19	6.8	-1.06127	gi|255633044|gb|ACU16877.1|/1.40286e-39/unknown [Glycine max]		Glyma19g36990	34.13	96.51	1.49964	gi|255645535|gb|ACU23262.1|/3.00815e-161/unknown [Glycine max]		Glyma19g39800	233.29	82.05	-1.50755	gi|255644738|gb|ACU22871.1|/3.26779e-69/unknown [Glycine max]
Glyma09g04690	11.39	23.06	1.01762	gi|255626683|gb|ACU13686.1|/1.13912e-50/unknown [Glycine max]								Glyma02g45170	172.63	393.43	1.18842	gi|255632932|gb|ACU16820.1|/4.4717e-40/unknown [Glycine max]								Glyma08g47990	42.58	87.85	1.04487	gi|255628049|gb|ACU14369.1|/8.81673e-79/unknown [Glycine max]		Glyma10g19480	36.93	17.78	-1.05454	gi|255636099|gb|ACU18394.1|/3.27987e-171/unknown [Glycine max]		Glyma09g36930	24.28	68.64	1.49928	gi|255628613|gb|ACU14651.1|/3.45467e-93/unknown [Glycine max]		Glyma09g38610	3636.24	1276.56	-1.51019	gi|255631856|gb|ACU16295.1|/2.93198e-98/unknown [Glycine max]
Glyma20g25990	168.11	340.32	1.01749	gi|255640638|gb|ACU20604.1|/2.72304e-95/unknown [Glycine max]								Glyma06g19710	17.44	39.71	1.1871	gi|255647257|gb|ACU24096.1|/2.0274e-117/unknown [Glycine max]								Glyma15g22780	13.1	27.02	1.04446	gi|255631458|gb|ACU16096.1|/3.55662e-46/unknown [Glycine max]		Glyma01g24650	34.02	16.39	-1.05357	gi|255636959|gb|ACU18812.1|/0/unknown [Glycine max]		Glyma03g17950	3.69	10.41	1.49628	gi|255641168|gb|ACU20861.1|/0/unknown [Glycine max]		Glyma20g30620	158.52	55.58	-1.51203	gi|255646999|gb|ACU23968.1|/0/unknown [Glycine max]
Glyma15g30110	41.02	83.03	1.01731	gi|255627851|gb|ACU14270.1|/9.06742e-88/unknown [Glycine max]								Glyma16g01110	17.63	40.06	1.18413	gi|255631426|gb|ACU16080.1|/3.08445e-79/unknown [Glycine max]								Glyma04g02360	15.47	31.9	1.04408	gi|255629877|gb|ACU15289.1|/9.17635e-122/unknown [Glycine max]		Glyma03g37460	136.1	65.72	-1.05026	gi|255632494|gb|ACU16597.1|/8.99133e-93/unknown [Glycine max]		Glyma03g26690	3.69	10.41	1.49628	gi|255646883|gb|ACU23911.1|/3.14597e-71/unknown [Glycine max]		Glyma12g31900	29.21	10.23	-1.51366	gi|217072308|gb|ACJ84514.1|/7.23041e-74/unknown [Medicago truncatula]
Glyma13g36250	23.31	46.95	1.01018	gi|255627183|gb|ACU13936.1|/1.99817e-57/unknown [Glycine max]								Glyma17g06710	5.45	12.37	1.18252	gi|255625807|gb|ACU13248.1|/1.49014e-44/unknown [Glycine max]								Glyma03g31060	40.94	84.37	1.04322	gi|217074300|gb|ACJ85510.1|/1.18902e-147/unknown [Medicago truncatula]		Glyma05g35940	20.56	9.94	-1.04852	gi|255631121|gb|ACU15926.1|/4.0253e-62/unknown [Glycine max]		Glyma09g38530	33.43	93.87	1.48952	gi|255641368|gb|ACU20961.1|/0/unknown [Glycine max]		Glyma08g19420	7.57	2.65	-1.5143	gi|217072994|gb|ACJ84857.1|/0/unknown [Medicago truncatula]
Glyma07g11910	53.29	107.26	1.00918	gi|118489678|gb|ABK96640.1|/1.57564e-112/unknown [Populus trichocarpa x Populus deltoides]								Glyma17g10920	15.81	35.7	1.17509	gi|255635892|gb|ACU18293.1|/0/unknown [Glycine max]								Glyma17g10520	74.23	152.87	1.04223	gi|255646614|gb|ACU23781.1|/3.17797e-157/unknown [Glycine max]		Glyma14g35940	37.12	17.95	-1.04821	gi|217071340|gb|ACJ84030.1|/6.22454e-82/unknown [Medicago truncatula]		Glyma08g07730	6.86	19.23	1.48708	gi|255642028|gb|ACU21281.1|/6.18017e-57/unknown [Glycine max]		Glyma16g03570	7.57	2.65	-1.5143	gi|255634622|gb|ACU17673.1|/3.54336e-79/unknown [Glycine max]
Glyma15g20670	41.55	83.53	1.00745	gi|255628777|gb|ACU14733.1|/2.96132e-100/unknown [Glycine max]								Glyma01g24880	16.17	36.23	1.16387	gi|255626995|gb|ACU13842.1|/3.86491e-34/unknown [Glycine max]								Glyma15g21990	23.29	47.94	1.04152	gi|255641136|gb|ACU20846.1|/5.76367e-152/unknown [Glycine max]		Glyma15g12690	19.1	9.24	-1.04761	gi|255627355|gb|ACU14022.1|/2.57187e-85/unknown [Glycine max]		Glyma02g08710	3.34	9.35	1.48512	gi|255639227|gb|ACU19912.1|/2.96028e-106/unknown [Glycine max]		Glyma19g43530	22.17	7.76	-1.51448	gi|255627225|gb|ACU13957.1|/2.39022e-64/unknown [Glycine max]
Glyma16g08470	13.5	27.07	1.00374	gi|255641899|gb|ACU21218.1|/0/unknown [Glycine max]								Glyma15g15800	41.07	91.96	1.16292	gi|255634254|gb|ACU17491.1|/3.70458e-36/unknown [Glycine max]								Glyma13g00280	10.01	20.57	1.0391	gi|255640010|gb|ACU20296.1|/4.68469e-156/unknown [Glycine max]		Glyma18g18860	16.92	8.19	-1.04679	gi|255640857|gb|ACU20711.1|/3.31773e-46/unknown [Glycine max]		Glyma04g02350	3.34	9.35	1.48512	gi|255632456|gb|ACU16578.1|/2.74424e-132/unknown [Glycine max]		Glyma12g08040	101.16	35.29	-1.51931	gi|255639497|gb|ACU20043.1|/8.98208e-155/unknown [Glycine max]
Glyma15g15800	69.94	140.17	1.00299	gi|255634254|gb|ACU17491.1|/3.70458e-36/unknown [Glycine max]								Glyma09g15600	8.18	18.29	1.16088	gi|294440421|gb|ADE74631.1|/0/unknown [Vitis vinifera]								Glyma15g15560	42.76	87.85	1.03878	gi|255629233|gb|ACU14961.1|/7.98478e-81/unknown [Glycine max]		Glyma09g40580	14.74	7.15	-1.04372	gi|255639802|gb|ACU20194.1|/7.54684e-166/unknown [Glycine max]		Glyma04g40810	231.36	646.48	1.48247	gi|255625869|gb|ACU13279.1|/5.13521e-11/unknown [Glycine max]		Glyma13g44980	12.14	4.23	-1.52104	gi|255646060|gb|ACU23517.1|/0/unknown [Glycine max]
Glyma20g02490	25.94	51.96	1.00222	gi|255641496|gb|ACU21023.1|/0/unknown [Glycine max]								Glyma09g34890	11.45	25.6	1.1608	gi|255629756|gb|ACU15227.1|/1.95124e-27/unknown [Glycine max]								Glyma17g10270	7.64	15.69	1.0382	gi|255634893|gb|ACU17805.1|/0/unknown [Glycine max]		Glyma07g29440	24.38	11.85	-1.04081	gi|217074674|gb|ACJ85697.1|/0/unknown [Medicago truncatula]		Glyma04g06240	63.69	177.85	1.48152	gi|255634632|gb|ACU17678.1|/4.12705e-118/unknown [Glycine max]		Glyma16g34750	17.24	6	-1.52273	gi|255637478|gb|ACU19066.1|/1.46009e-147/unknown [Glycine max]
Glyma03g05480	80.11	0.01	1.00077	gi|255637984|gb|ACU19308.1|/1.69597e-44/unknown [Glycine max]								Glyma06g06300	41.61	93	1.1603	gi|255634632|gb|ACU17678.1|/1.18062e-118/unknown [Glycine max]								Glyma04g43130	7.64	15.69	1.0382	gi|255640679|gb|ACU20624.1|/2.02626e-56/unknown [Glycine max]		Glyma19g02080	24.38	11.85	-1.04081	gi|255638564|gb|ACU19589.1|/0/unknown [Glycine max]		Glyma13g26970	7.74	21.53	1.47594	gi|255638061|gb|ACU19345.1|/3.00839e-50/unknown [Glycine max]		Glyma12g02170	23.4	8.12	-1.52696	gi|255639313|gb|ACU19954.1|/3.48203e-104/unknown [Glycine max]
												Glyma17g33800	6	13.41	1.16027	gi|255626141|gb|ACU13415.1|/3.82628e-99/unknown [Glycine max]								Glyma14g33330	11.64	23.88	1.03671	gi|255627345|gb|ACU14017.1|/1.33869e-42/unknown [Glycine max]		Glyma18g52310	36.93	17.95	-1.04081	gi|255633118|gb|ACU16914.1|/3.6691e-63/unknown [Glycine max]		Glyma14g35340	7.74	21.53	1.47594	gi|255637507|gb|ACU19080.1|/1.34378e-179/unknown [Glycine max]		Glyma05g07680	280.27	97.22	-1.52749	gi|255639859|gb|ACU20222.1|/0/unknown [Glycine max]
												Glyma14g40380	8.9	19.85	1.15726	gi|255641684|gb|ACU21114.1|/0/unknown [Glycine max]								Glyma15g11950	7.82	16.04	1.03643	gi|255635539|gb|ACU18120.1|/4.21041e-176/unknown [Glycine max]		Glyma09g38010	22.2	10.81	-1.03819	gi|255640137|gb|ACU20359.1|/7.25941e-165/unknown [Glycine max]		Glyma07g16130	13.72	38.11	1.47389	gi|255640412|gb|ACU20493.1|/2.74672e-59/unknown [Glycine max]		Glyma13g23200	9.68	3.35	-1.53085	gi|255630893|gb|ACU15809.1|/3.57229e-37/unknown [Glycine max]
												Glyma09g37590	17.26	38.49	1.15705	gi|255630802|gb|ACU15762.1|/4.47491e-71/unknown [Glycine max]								Glyma03g15850	10.37	21.27	1.0364	gi|255647333|gb|ACU24133.1|/1.00928e-177/unknown [Glycine max]		Glyma01g03070	346.79	168.91	-1.03781	gi|255632832|gb|ACU16769.1|/6.11365e-06/unknown [Glycine max]		Glyma19g06450	31.14	86.46	1.47326	gi|255625985|gb|ACU13337.1|/1.69662e-69/unknown [Glycine max]		Glyma16g26380	15.31	5.29	-1.53313	gi|255641660|gb|ACU21102.1|/6.64543e-152/unknown [Glycine max]
												Glyma19g17690	5.63	12.54	1.15533	gi|124359732|gb|ABD32835.2|/9.63089e-26/Protein of unknown function DUF315 [Medicago truncatula]								Glyma20g26710	18.19	37.3	1.03603	gi|255641465|gb|ACU21008.1|/0/unknown [Glycine max]		Glyma18g03950	79.69	38.87	-1.03574	gi|255632780|gb|ACU16743.1|/4.61915e-139/unknown [Glycine max]		Glyma11g19680	3.69	10.23	1.47111	gi|255646157|gb|ACU23564.1|/7.71273e-171/unknown [Glycine max]		Glyma14g06810	26.21	9	-1.54212	gi|255635088|gb|ACU17902.1|/4.12856e-164/unknown [Glycine max]
												Glyma17g32910	6.18	13.76	1.1548	gi|255639667|gb|ACU20127.1|/0/unknown [Glycine max]								Glyma15g16190	12.01	24.58	1.03325	gi|255626683|gb|ACU13686.1|/2.80333e-10/unknown [Glycine max]		Glyma07g10170	67.5	32.95	-1.03461	gi|255630770|gb|ACU15746.1|/2.22222e-59/unknown [Glycine max]		Glyma02g16320	12.67	35.11	1.47047	gi|255637881|gb|ACU19259.1|/1.70407e-125/unknown [Glycine max]		Glyma05g30870	23.75	8.12	-1.54838	gi|255634863|gb|ACU17790.1|/0/unknown [Glycine max]
												Glyma15g10160	15.45	34.31	1.15102	gi|255636971|gb|ACU18818.1|/0/unknown [Glycine max]								Glyma05g37300	114.99	235.32	1.03312	gi|255645926|gb|ACU23452.1|/7.7326e-116/unknown [Glycine max]		Glyma08g09200	188.86	92.21	-1.03432	gi|255627103|gb|ACU13896.1|/1.30498e-60/unknown [Glycine max]		Glyma14g10830	5.1	14.12	1.46917	gi|217071372|gb|ACJ84046.1|/1.37353e-44/unknown [Medicago truncatula]		Glyma03g25790	42.93	14.64	-1.55207	gi|255627745|gb|ACU14217.1|/3.83092e-84/unknown [Glycine max]
												Glyma15g15140	32.89	72.97	1.14965	gi|255626981|gb|ACU13835.1|/1.14912e-40/unknown [Glycine max]								Glyma15g16060	16.56	33.82	1.03017	gi|255633354|gb|ACU17034.1|/2.93426e-59/unknown [Glycine max]		Glyma17g07700	74.6	36.43	-1.03405	gi|255639469|gb|ACU20029.1|/1.68326e-124/unknown [Glycine max]		Glyma19g33120	9.5	26.29	1.46851	gi|255640849|gb|ACU20707.1|/1.31359e-49/unknown [Glycine max]		Glyma19g40320	44.51	15.17	-1.55291	gi|255641244|gb|ACU20899.1|/2.84407e-61/unknown [Glycine max]
												Glyma19g25870	9.27	20.55	1.1485	gi|255637583|gb|ACU19117.1|/1.44612e-151/unknown [Glycine max]								Glyma20g16910	67.32	137.36	1.02885	gi|255637560|gb|ACU19106.1|/1.31511e-99/unknown [Glycine max]		Glyma02g25250	23.11	11.33	-1.02837	gi|255640181|gb|ACU20381.1|/4.30198e-169/unknown [Glycine max]		Glyma01g03150	7.21	19.94	1.46759	gi|255639955|gb|ACU20270.1|/7.43526e-91/unknown [Glycine max]		Glyma10g29170	18.65	6.35	-1.55435	gi|255629506|gb|ACU15099.1|/1.0025e-93/unknown [Glycine max]
												Glyma09g06860	8.72	19.33	1.14844	gi|255628485|gb|ACU14587.1|/1.90486e-125/unknown [Glycine max]								Glyma07g32120	40.76	83.15	1.02856	gi|217075142|gb|ACJ85931.1|/2.81429e-106/unknown [Medicago truncatula]		Glyma19g04180	14.92	7.32	-1.02733	gi|255636525|gb|ACU18601.1|/2.14044e-99/unknown [Glycine max]		Glyma05g36960	68.09	188.26	1.46721	gi|255626215|gb|ACU13452.1|/1.13314e-65/unknown [Glycine max]		Glyma01g32370	10.91	3.71	-1.55616	gi|255646292|gb|ACU23630.1|/1.51906e-34/unknown [Glycine max]
												Glyma19g26760	8.72	19.33	1.14844	gi|255629311|gb|ACU15000.1|/3.3722e-98/unknown [Glycine max]								Glyma02g08610	12.92	26.32	1.02655	gi|255635811|gb|ACU18254.1|/0/unknown [Glycine max]		Glyma12g28620	22.74	11.16	-1.0269	gi|92893672|gb|ABE91850.1|/3.12999e-152/Protein of unknown function DUF707 [Medicago truncatula]		Glyma17g12170	23.58	65.11	1.46532	gi|255632707|gb|ACU16705.1|/1.33716e-29/unknown [Glycine max]		Glyma02g03860	32.72	11.12	-1.55702	gi|255641867|gb|ACU21202.1|/0/unknown [Glycine max]
												Glyma06g32680	21.26	47.02	1.14513	gi|255645765|gb|ACU23375.1|/0/unknown [Glycine max]								Glyma01g40420	10.01	20.39	1.02642	gi|255635824|gb|ACU18260.1|/0/unknown [Glycine max]		Glyma03g05010	29.11	14.29	-1.02651	gi|255631528|gb|ACU16131.1|/2.78755e-105/unknown [Glycine max]		Glyma17g17730	4.22	11.65	1.46502	gi|255637875|gb|ACU19256.1|/9.69224e-86/unknown [Glycine max]		Glyma06g34850	11.44	3.88	-1.55996	gi|255641326|gb|ACU20940.1|/3.25727e-86/unknown [Glycine max]
												Glyma13g11570	6.54	14.46	1.14471	gi|255628553|gb|ACU14621.1|/8.75324e-88/unknown [Glycine max]								Glyma16g26150	11.64	23.71	1.0264	gi|255638480|gb|ACU19549.1|/2.59615e-62/unknown [Glycine max]		Glyma08g02590	44.03	21.62	-1.02612	gi|255638027|gb|ACU19328.1|/9.65691e-103/unknown [Glycine max]		Glyma09g24170	7.74	21.35	1.46383	gi|255628559|gb|ACU14624.1|/1.2022e-39/unknown [Glycine max]		Glyma17g12710	404.3	137.1	-1.5602	gi|255640770|gb|ACU20669.1|/6.62106e-67/unknown [Glycine max]
												Glyma06g37260	1739.19	3842.85	1.14376	gi|255627093|gb|ACU13891.1|/3.07718e-09/unknown [Glycine max]								Glyma05g23890	34.93	71.12	1.02579	gi|255629926|gb|ACU15315.1|/2.28057e-23/unknown [Glycine max]		Glyma13g31330	14.56	7.15	-1.026	gi|255637671|gb|ACU19159.1|/1.8642e-122/unknown [Glycine max]		Glyma16g09430	3.52	9.7	1.46241	gi|21554361|gb|AAM63468.1|/2.18256e-140/unknown [Arabidopsis thaliana]		Glyma19g03090	14.07	4.76	-1.56359	gi|255634551|gb|ACU17638.1|/1.46628e-107/unknown [Glycine max]
												Glyma08g46840	7.81	17.24	1.14237	gi|255627277|gb|ACU13983.1|/7.75494e-69/unknown [Glycine max]								Glyma11g01770	11.83	24.06	1.02419	gi|255631742|gb|ACU16238.1|/2.85983e-80/unknown [Glycine max]		Glyma02g45650	34.39	16.91	-1.02411	gi|255636453|gb|ACU18565.1|/7.07802e-85/unknown [Glycine max]		Glyma05g36260	15.66	43.05	1.45893	gi|255637035|gb|ACU18850.1|/0/unknown [Glycine max]		Glyma20g21520	308.77	104.28	-1.56607	gi|255647319|gb|ACU24126.1|/1.3691e-66/unknown [Glycine max]
												Glyma05g36020	13.81	30.48	1.14215	gi|255640082|gb|ACU20332.1|/4.86477e-138/unknown [Glycine max]								Glyma13g23760	10.37	21.09	1.02414	gi|255627765|gb|ACU14227.1|/2.98228e-42/unknown [Glycine max]		Glyma13g42210	26.2	12.9	-1.0222	gi|255645658|gb|ACU23323.1|/1.15222e-166/unknown [Glycine max]		Glyma19g43000	4.05	11.12	1.45716	gi|255636789|gb|ACU18728.1|/1.84989e-107/unknown [Glycine max]		Glyma11g36980	17.77	6	-1.56641	gi|255635964|gb|ACU18328.1|/2.39837e-177/unknown [Glycine max]
												Glyma03g40280	11.45	25.25	1.14094	gi|255626453|gb|ACU13571.1|/7.80054e-66/unknown [Glycine max]								Glyma16g28340	55.49	112.78	1.02321	gi|255642251|gb|ACU21390.1|/8.39591e-106/unknown [Glycine max]		Glyma12g07040	51.67	25.45	-1.02166	gi|255626827|gb|ACU13758.1|/1.81478e-46/unknown [Glycine max]		Glyma16g25210	3.34	9.17	1.45707	gi|255646239|gb|ACU23604.1|/0/unknown [Glycine max]		Glyma05g30200	64.92	21.88	-1.56905	gi|255627019|gb|ACU13854.1|/3.84723e-72/unknown [Glycine max]
												Glyma17g10480	26.89	59.21	1.13877	gi|255631634|gb|ACU16184.1|/8.08112e-125/unknown [Glycine max]								Glyma19g43230	12.01	24.4	1.02264	gi|255639307|gb|ACU19951.1|/1.22181e-174/unknown [Glycine max]		Glyma16g23920	24.02	11.85	-1.01935	gi|255637533|gb|ACU19093.1|/0/unknown [Glycine max]		Glyma08g14460	17.95	49.23	1.45555	gi|255640814|gb|ACU20690.1|/8.21996e-165/unknown [Glycine max]		Glyma07g29670	25.16	8.47	-1.5707	gi|255645013|gb|ACU23006.1|/0/unknown [Glycine max]
												Glyma02g37710	13.08	28.74	1.1357	gi|255644528|gb|ACU22767.1|/0/unknown [Glycine max]								Glyma02g36500	72.6	147.47	1.02238	gi|255625737|gb|ACU13213.1|/3.7567e-88/unknown [Glycine max]		Glyma11g01660	24.02	11.85	-1.01935	gi|217074790|gb|ACJ85755.1|/1.38781e-142/unknown [Medicago truncatula]		Glyma07g14490	4.57	12.53	1.45512	gi|217073236|gb|ACJ84977.1|/2.78122e-91/unknown [Medicago truncatula]		Glyma10g14110	318.97	107.28	-1.57204	gi|255626115|gb|ACU13402.1|/3.92726e-66/unknown [Glycine max]
												Glyma05g07500	8.54	18.64	1.12609	gi|255629464|gb|ACU15078.1|/1.599e-53/unknown [Glycine max]								Glyma17g15040	40.94	83.15	1.02221	gi|255626889|gb|ACU13789.1|/4.23585e-47/unknown [Glycine max]		Glyma13g01510	18.01	8.89	-1.01854	gi|255642022|gb|ACU21278.1|/0/unknown [Glycine max]		Glyma12g09750	7.21	19.76	1.45451	gi|255636059|gb|ACU18374.1|/0/unknown [Glycine max]		Glyma19g22690	32.02	10.76	-1.5733	gi|217074764|gb|ACJ85742.1|/0/unknown [Medicago truncatula]
												Glyma06g42900	37.61	81.86	1.12204	gi|255630280|gb|ACU15495.1|/3.00497e-72/unknown [Glycine max]								Glyma09g39930	23.83	48.29	1.01895	gi|255628937|gb|ACU14813.1|/1.13126e-45/unknown [Glycine max]		Glyma20g26610	23.29	11.5	-1.01808	gi|255627849|gb|ACU14269.1|/1.31759e-130/unknown [Glycine max]		Glyma18g01330	3.87	10.59	1.4523	gi|255647735|gb|ACU24328.1|/3.50722e-172/unknown [Glycine max]		Glyma07g08310	66.33	22.23	-1.57715	gi|255638782|gb|ACU19695.1|/4.15722e-34/unknown [Glycine max]
												Glyma07g37370	17.63	38.32	1.12007	gi|255632976|gb|ACU16842.1|/7.46587e-135/unknown [Glycine max]								Glyma13g20220	9.83	19.87	1.01533	gi|255646151|gb|ACU23561.1|/2.84068e-104/unknown [Glycine max]		Glyma05g28490	128.09	63.28	-1.01734	gi|255642128|gb|ACU21329.1|/0/unknown [Glycine max]		Glyma06g20240	143.92	393.82	1.45227	gi|217069960|gb|ACJ83340.1|/8.60841e-52/unknown [Medicago truncatula]		Glyma19g45140	24.28	8.12	-1.58022	gi|255641390|gb|ACU20972.1|/0/unknown [Glycine max]
												Glyma15g21500	6.36	13.76	1.11338	gi|255647687|gb|ACU24305.1|/0/unknown [Glycine max]								Glyma10g44200	38.21	77.22	1.01502	gi|255626205|gb|ACU13447.1|/4.94011e-113/unknown [Glycine max]		Glyma09g00980	17.65	8.72	-1.01727	gi|255635327|gb|ACU18017.1|/6.2414e-166/unknown [Glycine max]		Glyma12g33740	4.4	12	1.44746	gi|255648333|gb|ACU24618.1|/4.51562e-135/unknown [Glycine max]		Glyma09g28440	39.06	13.06	-1.58054	gi|255641130|gb|ACU20843.1|/1.34285e-129/unknown [Glycine max]
												Glyma02g03530	6.54	14.11	1.10936	gi|217071620|gb|ACJ84170.1|/9.87113e-56/unknown [Medicago truncatula]								Glyma15g10660	71.69	144.68	1.01302	gi|255628993|gb|ACU14841.1|/5.74783e-44/unknown [Glycine max]		Glyma18g52680	40.21	19.87	-1.01696	gi|255632697|gb|ACU16700.1|/5.01921e-56/unknown [Glycine max]		Glyma07g37370	15.66	42.7	1.44715	gi|255632976|gb|ACU16842.1|/7.46587e-135/unknown [Glycine max]		Glyma17g34040	10.56	3.53	-1.58087	gi|255626605|gb|ACU13647.1|/1.75753e-88/unknown [Glycine max]
												Glyma11g37790	8.72	18.81	1.1091	gi|255630244|gb|ACU15477.1|/3.18154e-45/unknown [Glycine max]								Glyma09g38430	10.37	20.92	1.01247	gi|255636477|gb|ACU18577.1|/3.07087e-157/unknown [Glycine max]		Glyma09g29350	68.78	33.99	-1.01688	gi|255646769|gb|ACU23857.1|/3.03975e-113/unknown [Glycine max]		Glyma17g06000	5.45	14.82	1.44322	gi|255647003|gb|ACU23970.1|/5.42628e-143/unknown [Glycine max]		Glyma16g01680	23.22	7.76	-1.58124	gi|255647570|gb|ACU24248.1|/4.86473e-137/unknown [Glycine max]
												Glyma15g01020	8	17.24	1.10769	gi|255632396|gb|ACU16548.1|/9.0201e-117/unknown [Glycine max]								Glyma08g21730	78.96	159.15	1.01119	gi|255627519|gb|ACU14104.1|/7.77217e-115/unknown [Glycine max]		Glyma13g32430	46.21	22.84	-1.01664	gi|255640592|gb|ACU20581.1|/7.57856e-90/unknown [Glycine max]		Glyma01g34940	15.13	41.11	1.44208	gi|255634716|gb|ACU17720.1|/8.41555e-89/unknown [Glycine max]		Glyma04g33210	8.44	2.82	-1.58155	gi|255644629|gb|ACU22817.1|/3.15699e-86/unknown [Glycine max]
												Glyma17g35320	9.63	20.73	1.10611	gi|255631930|gb|ACU16332.1|/1.58526e-36/unknown [Glycine max]								Glyma01g45480	10.73	21.62	1.01072	gi|255637907|gb|ACU19271.1|/4.34463e-41/unknown [Glycine max]		Glyma15g13190	39.48	19.52	-1.01617	gi|255627919|gb|ACU14304.1|/3.50382e-95/unknown [Glycine max]		Glyma11g02000	4.75	12.88	1.43913	gi|255630706|gb|ACU15714.1|/2.41026e-33/unknown [Glycine max]		Glyma09g40110	8.44	2.82	-1.58155	gi|124360852|gb|ABN08824.1|/0/Protein of unknown function DUF248, methyltransferase putative [Medicago truncatula]
												Glyma10g31810	6.72	14.46	1.10553	gi|255636939|gb|ACU18802.1|/9.53915e-106/unknown [Glycine max]								Glyma07g05470	23.83	47.94	1.00845	gi|255645225|gb|ACU23110.1|/0/unknown [Glycine max]		Glyma13g17260	16.56	8.19	-1.01577	gi|255645339|gb|ACU23166.1|/1.27867e-121/unknown [Glycine max]		Glyma13g44250	16.01	43.4	1.43872	gi|255637956|gb|ACU19294.1|/3.00517e-115/unknown [Glycine max]		Glyma07g30430	281.5	93.69	-1.58717	gi|255646951|gb|ACU23945.1|/0/unknown [Glycine max]
												Glyma06g05810	563.5	1212.33	1.10529	gi|255637994|gb|ACU19313.1|/1.87732e-60/unknown [Glycine max]								Glyma13g38720	24.93	50.03	1.00491	gi|255637379|gb|ACU19018.1|/7.71164e-172/unknown [Glycine max]		Glyma14g20380	179.4	88.73	-1.01569	gi|255631175|gb|ACU15953.1|/4.03546e-87/unknown [Glycine max]		Glyma19g41120	32.55	88.22	1.43845	gi|255647484|gb|ACU24206.1|/0/unknown [Glycine max]		Glyma20g08580	23.93	7.94	-1.59161	gi|255638080|gb|ACU19354.1|/0/unknown [Glycine max]
												Glyma06g14710	11.99	25.78	1.10442	gi|255647052|gb|ACU23994.1|/2.71873e-23/unknown [Glycine max]								Glyma01g43710	37.3	74.78	1.00348	gi|255631742|gb|ACU16238.1|/2.15132e-71/unknown [Glycine max]		Glyma17g17970	104.44	51.77	-1.01249	gi|255639301|gb|ACU19948.1|/8.03981e-08/unknown [Glycine max]		Glyma10g18310	16.36	44.29	1.43681	gi|255630887|gb|ACU15806.1|/1.17806e-84/unknown [Glycine max]		Glyma17g23740	166.61	55.05	-1.59766	gi|255642301|gb|ACU21415.1|/1.82316e-126/unknown [Glycine max]
												Glyma05g23220	65.05	139.68	1.1025	gi|255631866|gb|ACU16300.1|/6.70561e-57/unknown [Glycine max]								Glyma05g28060	179.94	360.66	1.00312	gi|255633110|gb|ACU16910.1|/1.22742e-12/unknown [Glycine max]		Glyma02g16210	30.93	15.34	-1.01171	gi|255641609|gb|ACU21077.1|/0/unknown [Glycine max]		Glyma10g43840	4.57	12.35	1.43424	gi|217074440|gb|ACJ85580.1|/0/unknown [Medicago truncatula]		Glyma01g00860	14.43	4.76	-1.60004	gi|255627383|gb|ACU14036.1|/2.40768e-37/unknown [Glycine max]
												Glyma08g40970	19.63	42.15	1.10247	gi|255641463|gb|ACU21007.1|/2.9226e-143/unknown [Glycine max]								Glyma02g44060	9.83	19.7	1.00293	gi|255639399|gb|ACU19995.1|/1.4221e-158/unknown [Glycine max]		Glyma02g00750	18.19	9.06	-1.00556	gi|255635793|gb|ACU18245.1|/0/unknown [Glycine max]		Glyma09g37350	3.34	9	1.43008	gi|87240355|gb|ABD32213.1|/1.29539e-179/Protein of unknown function DUF1666 [Medicago truncatula]		Glyma14g01190	24.1	7.94	-1.60182	gi|255628665|gb|ACU14677.1|/1.40563e-87/unknown [Glycine max]
												Glyma09g38560	13.99	29.96	1.09864	gi|255630950|gb|ACU15838.1|/3.27202e-88/unknown [Glycine max]								Glyma02g39510	43.85	87.85	1.00247	gi|255626693|gb|ACU13691.1|/6.43411e-57/unknown [Glycine max]		Glyma03g30380	32.2	16.04	-1.00539	gi|255630772|gb|ACU15747.1|/4.31734e-101/unknown [Glycine max]		Glyma11g13060	6.16	16.59	1.42931	gi|255626673|gb|ACU13681.1|/1.49564e-80/unknown [Glycine max]		Glyma11g02800	23.05	7.59	-1.60259	gi|217074990|gb|ACJ85855.1|/2.11538e-90/unknown [Medicago truncatula]
												Glyma17g05330	17.26	36.92	1.09697	gi|255638492|gb|ACU19555.1|/5.11533e-85/unknown [Glycine max]								Glyma17g10740	8.01	16.04	1.0018	gi|255640742|gb|ACU20655.1|/1.35949e-79/unknown [Glycine max]		Glyma11g35740	34.93	17.43	-1.00289	gi|255639127|gb|ACU19863.1|/1.71196e-142/unknown [Glycine max]		Glyma08g05970	20.06	53.99	1.42837	gi|255629237|gb|ACU14963.1|/1.46497e-59/unknown [Glycine max]		Glyma08g17950	20.94	6.88	-1.60578	gi|255646441|gb|ACU23699.1|/1.79291e-120/unknown [Glycine max]
												Glyma08g05730	36.89	78.89	1.09661	gi|255638390|gb|ACU19506.1|/4.86292e-127/unknown [Glycine max]														Glyma03g05530	52.4	26.15	-1.00276	gi|255630445|gb|ACU15580.1|/3.03988e-67/unknown [Glycine max]		Glyma18g49040	29.91	80.46	1.42764	gi|255630802|gb|ACU15762.1|/5.13495e-48/unknown [Glycine max]		Glyma01g34660	9.68	3.18	-1.60598	gi|255632386|gb|ACU16543.1|/3.72439e-58/unknown [Glycine max]
												Glyma10g40390	83.41	177.47	1.08928	gi|255639455|gb|ACU20022.1|/0/unknown [Glycine max]														Glyma13g29070	21.65	10.81	-1.002	gi|255630099|gb|ACU15403.1|/7.83553e-66/unknown [Glycine max]		Glyma11g11450	3.87	10.41	1.42756	gi|255637704|gb|ACU19175.1|/2.91926e-125/unknown [Glycine max]		Glyma08g02180	9.68	3.18	-1.60598	gi|255639549|gb|ACU20069.1|/0/unknown [Glycine max]
												Glyma01g39530	42.16	89.69	1.08907	gi|255632210|gb|ACU16463.1|/5.38849e-96/unknown [Glycine max]														Glyma13g42360	66.59	33.29	-1.00022	gi|255642429|gb|ACU21478.1|/0/unknown [Glycine max]		Glyma12g34100	4.22	11.29	1.41973	gi|255639267|gb|ACU19932.1|/1.43221e-56/unknown [Glycine max]		Glyma10g36640	9.68	3.18	-1.60598	gi|255632340|gb|ACU16528.1|/2.76143e-100/unknown [Glycine max]
												Glyma13g27800	40.7	86.56	1.08867	gi|255639725|gb|ACU20156.1|/1.59788e-126/unknown [Glycine max]																				Glyma18g46720	9.85	26.29	1.41632	gi|255629295|gb|ACU14992.1|/5.0489e-61/unknown [Glycine max]		Glyma06g01090	26.92	8.82	-1.60983	gi|255648279|gb|ACU24592.1|/8.3039e-139/unknown [Glycine max]
												Glyma18g09110	15.81	33.61	1.08805	gi|255642002|gb|ACU21268.1|/0/unknown [Glycine max]																				Glyma11g03950	5.63	15	1.41376	gi|255646144|gb|ACU23558.1|/3.02283e-60/unknown [Glycine max]		Glyma19g35770	160.1	52.4	-1.61133	gi|255630744|gb|ACU15733.1|/2.37371e-85/unknown [Glycine max]
												Glyma08g17700	16.72	35.53	1.08746	gi|255633218|gb|ACU16965.1|/1.37204e-39/unknown [Glycine max]																				Glyma17g10820	33.78	89.99	1.4136	gi|255639323|gb|ACU19959.1|/1.79852e-94/unknown [Glycine max]		Glyma01g42490	8.62	2.82	-1.61199	gi|255641344|gb|ACU20949.1|/6.60239e-139/unknown [Glycine max]
												Glyma08g45310	27.98	59.39	1.08582	gi|255630593|gb|ACU15656.1|/8.06549e-35/unknown [Glycine max]																				Glyma03g38520	29.03	77.28	1.41255	gi|255647484|gb|ACU24206.1|/0/unknown [Glycine max]		Glyma16g23220	8.62	2.82	-1.61199	gi|255627091|gb|ACU13890.1|/8.45068e-96/unknown [Glycine max]
												Glyma13g22810	23.99	50.68	1.07898	gi|255635619|gb|ACU18159.1|/2.36305e-122/unknown [Glycine max]																				Glyma02g12050	7.57	20.11	1.40955	gi|255626575|gb|ACU13632.1|/2.1877e-97/unknown [Glycine max]		Glyma19g38580	8.62	2.82	-1.61199	gi|255640818|gb|ACU20692.1|/1.59857e-122/unknown [Glycine max]
												Glyma14g17060	7.27	15.33	1.07633	gi|255631616|gb|ACU16175.1|/3.64195e-75/unknown [Glycine max]																				Glyma14g40380	5.98	15.88	1.40899	gi|255641684|gb|ACU21114.1|/0/unknown [Glycine max]		Glyma05g03770	80.4	26.29	-1.61268	gi|255642896|gb|ACU22671.1|/2.18804e-122/unknown [Glycine max]
												Glyma04g04160	17.44	36.75	1.07534	gi|255629361|gb|ACU15025.1|/1.53566e-100/unknown [Glycine max]																				Glyma10g00890	84.63	224.08	1.40477	gi|255638035|gb|ACU19332.1|/2.20344e-117/unknown [Glycine max]		Glyma13g38240	15.13	4.94	-1.61483	gi|255630020|gb|ACU15362.1|/4.35196e-67/unknown [Glycine max]
												Glyma02g42050	7.45	15.67	1.07269	gi|255645412|gb|ACU23202.1|/0/unknown [Glycine max]																				Glyma11g21530	7.21	19.06	1.40248	gi|255638751|gb|ACU19680.1|/0/unknown [Glycine max]		Glyma01g01170	7.57	2.47	-1.61578	gi|255636224|gb|ACU18453.1|/0/unknown [Glycine max]
												Glyma15g03560	27.44	57.65	1.07104	gi|255641545|gb|ACU21046.1|/0/unknown [Glycine max]																				Glyma11g07360	5.81	15.35	1.40163	gi|255639501|gb|ACU20045.1|/2.04077e-152/unknown [Glycine max]		Glyma02g02350	244.37	79.58	-1.61859	gi|255627213|gb|ACU13951.1|/1.78185e-121/unknown [Glycine max]
												Glyma09g06000	8.72	18.29	1.06866	gi|255638120|gb|ACU19374.1|/1.04295e-101/unknown [Glycine max]																				Glyma07g03360	36.42	95.98	1.398	gi|255639039|gb|ACU19820.1|/5.64086e-135/unknown [Glycine max]		Glyma13g44690	27.09	8.82	-1.61891	gi|255626071|gb|ACU13380.1|/1.22325e-68/unknown [Glycine max]
												Glyma14g12050	16.54	34.66	1.06731	gi|255627143|gb|ACU13916.1|/3.07749e-93/unknown [Glycine max]																				Glyma05g28920	7.57	19.94	1.3973	gi|255639935|gb|ACU20260.1|/0/unknown [Glycine max]		Glyma12g06030	13.55	4.41	-1.61944	gi|255640402|gb|ACU20488.1|/3.41764e-15/unknown [Glycine max]
												Glyma15g42980	22.71	47.55	1.06612	gi|255637439|gb|ACU19047.1|/9.19616e-87/unknown [Glycine max]																				Glyma04g40390	99.05	260.78	1.3966	gi|255632492|gb|ACU16596.1|/2.08801e-83/unknown [Glycine max]		Glyma11g21010	38.53	12.53	-1.6206	gi|255629177|gb|ACU14933.1|/4.90856e-80/unknown [Glycine max]
												Glyma01g26970	13.63	28.39	1.0586	gi|255639070|gb|ACU19835.1|/6.10301e-110/unknown [Glycine max]																				Glyma08g08020	5.1	13.41	1.39474	gi|255636326|gb|ACU18502.1|/0/unknown [Glycine max]		Glyma04g34160	10.91	3.53	-1.62791	gi|255641192|gb|ACU20873.1|/3.92409e-162/unknown [Glycine max]
												Glyma19g43120	27.8	57.82	1.05648	gi|255631716|gb|ACU16225.1|/1.60792e-110/unknown [Glycine max]																				Glyma06g06850	25.51	67.05	1.39417	gi|217072780|gb|ACJ84750.1|/0/unknown [Medicago truncatula]		Glyma06g05860	41.52	13.41	-1.6305	gi|255640642|gb|ACU20606.1|/4.56457e-129/unknown [Glycine max]
												Glyma07g07870	8.72	18.11	1.05439	gi|255645533|gb|ACU23261.1|/3.91947e-144/unknown [Glycine max]																				Glyma06g12580	6.86	18	1.39172	gi|255638723|gb|ACU19666.1|/9.16795e-105/unknown [Glycine max]		Glyma19g42760	43.81	14.12	-1.63352	gi|255625587|gb|ACU13138.1|/2.93726e-52/unknown [Glycine max]
												Glyma07g15930	23.08	47.89	1.05308	gi|255635789|gb|ACU18243.1|/0/unknown [Glycine max]																				Glyma14g24040	5.45	14.29	1.39068	gi|255638882|gb|ACU19743.1|/9.74541e-63/unknown [Glycine max]		Glyma18g05620	8.27	2.65	-1.64189	gi|255638297|gb|ACU19461.1|/7.41804e-99/unknown [Glycine max]
												Glyma05g33390	80.68	167.19	1.05121	gi|255627899|gb|ACU14294.1|/1.70488e-68/unknown [Glycine max]																				Glyma05g14330	15.48	40.58	1.39036	gi|255641143|gb|ACU20849.1|/2.23943e-131/unknown [Glycine max]		Glyma03g40720	83.39	26.64	-1.64628	gi|255638648|gb|ACU19629.1|/0/unknown [Glycine max]
												Glyma02g13850	21.08	43.54	1.04647	gi|255641869|gb|ACU21203.1|/1.48457e-144/unknown [Glycine max]																				Glyma05g34350	75.48	197.44	1.38725	gi|255633528|gb|ACU17122.1|/4.48701e-76/unknown [Glycine max]		Glyma06g16800	30.96	9.88	-1.64782	gi|255647983|gb|ACU24448.1|/2.26725e-48/unknown [Glycine max]
												Glyma08g07210	9.45	19.51	1.04583	gi|217073560|gb|ACJ85140.1|/1.19968e-125/unknown [Medicago truncatula]																				Glyma08g41220	39.06	102.16	1.38707	gi|217074996|gb|ACJ85858.1|/0/unknown [Medicago truncatula]		Glyma08g14070	18.83	6	-1.65	gi|255634863|gb|ACU17790.1|/0/unknown [Glycine max]
												Glyma13g38240	7.27	14.98	1.04301	gi|255630020|gb|ACU15362.1|/4.35196e-67/unknown [Glycine max]																				Glyma08g40370	9.85	25.76	1.38694	gi|255638696|gb|ACU19653.1|/2.7776e-111/unknown [Glycine max]		Glyma18g08070	11.08	3.53	-1.65022	gi|255638715|gb|ACU19662.1|/2.36913e-180/unknown [Glycine max]
												Glyma20g23420	27.08	55.73	1.04123	gi|255640940|gb|ACU20750.1|/6.36799e-129/unknown [Glycine max]																				Glyma12g33720	4.05	10.59	1.38671	gi|75860382|gb|ABA29158.1|/0/unknown [Pisum sativum]		Glyma19g42480	14.43	4.59	-1.65251	gi|255626609|gb|ACU13649.1|/3.02937e-94/unknown [Glycine max]
												Glyma01g05490	7.45	15.33	1.04105	gi|255629299|gb|ACU14994.1|/6.38761e-110/unknown [Glycine max]																				Glyma09g22270	26.39	68.99	1.3864	gi|255636781|gb|ACU18724.1|/1.17681e-159/unknown [Glycine max]		Glyma14g06820	72.66	23.11	-1.65264	gi|255626245|gb|ACU13467.1|/2.55963e-60/unknown [Glycine max]
												Glyma01g17870	14.17	29.08	1.03719	gi|255648012|gb|ACU24462.1|/1.78125e-133/unknown [Glycine max]																				Glyma07g37070	4.93	12.88	1.38547	gi|255628633|gb|ACU14661.1|/3.49224e-108/unknown [Glycine max]		Glyma06g03410	35.01	11.12	-1.65461	gi|255637531|gb|ACU19092.1|/5.35723e-174/unknown [Glycine max]
												Glyma02g45650	10.36	21.25	1.03644	gi|255636453|gb|ACU18565.1|/7.07802e-85/unknown [Glycine max]																				Glyma04g39750	17.59	45.87	1.3828	gi|255645748|gb|ACU23367.1|/4.86235e-49/unknown [Glycine max]		Glyma06g00740	7.21	2.29	-1.65465	gi|255632157|gb|ACU16431.1|/1.08492e-87/unknown [Glycine max]
												Glyma08g10060	8	16.37	1.03298	gi|255630768|gb|ACU15745.1|/1.92543e-42/unknown [Glycine max]																				Glyma11g33620	6.16	16.06	1.38247	gi|255639541|gb|ACU20065.1|/1.12134e-100/unknown [Glycine max]		Glyma05g27300	13.9	4.41	-1.65623	gi|255647056|gb|ACU23996.1|/0/unknown [Glycine max]
												Glyma07g08040	49.43	101.01	1.03104	gi|255635252|gb|ACU17980.1|/7.34954e-131/unknown [Glycine max]																				Glyma10g03350	4.4	11.47	1.38229	gi|255645989|gb|ACU23482.1|/0/unknown [Glycine max]		Glyma04g03680	10.03	3.18	-1.65722	gi|255638304|gb|ACU19464.1|/4.98584e-111/unknown [Glycine max]
												Glyma01g31750	94.31	192.1	1.02637	gi|255637984|gb|ACU19308.1|/2.76793e-99/unknown [Glycine max]																				Glyma02g08110	9.68	25.23	1.38206	gi|255645287|gb|ACU23140.1|/1.01514e-153/unknown [Glycine max]		Glyma04g08230	10.03	3.18	-1.65722	gi|255632606|gb|ACU16653.1|/1.68309e-54/unknown [Glycine max]
												Glyma13g32430	13.99	28.39	1.02099	gi|255640592|gb|ACU20581.1|/7.57856e-90/unknown [Glycine max]																				Glyma12g36960	3.52	9.17	1.38135	gi|255640203|gb|ACU20392.1|/2.95863e-142/unknown [Glycine max]		Glyma12g09930	16.71	5.29	-1.65937	gi|255647989|gb|ACU24451.1|/4.86e-136/unknown [Glycine max]
												Glyma13g23130	9.27	18.81	1.02086	gi|255633048|gb|ACU16879.1|/1.29726e-25/unknown [Glycine max]																				Glyma09g36760	6.51	16.94	1.3797	gi|217075306|gb|ACJ86013.1|/3.35965e-86/unknown [Medicago truncatula]		Glyma08g46940	61.4	19.41	-1.66144	gi|255642201|gb|ACU21365.1|/1.73336e-129/unknown [Glycine max]
												Glyma17g36860	48.52	98.4	1.02008	gi|255640034|gb|ACU20308.1|/1.63898e-168/unknown [Glycine max]																				Glyma03g38410	4.75	12.35	1.37851	gi|255642473|gb|ACU21500.1|/0/unknown [Glycine max]		Glyma04g16660	15.66	4.94	-1.6645	gi|255625993|gb|ACU13341.1|/3.67651e-77/unknown [Glycine max]
												Glyma17g34870	570.58	1155.38	1.01787	gi|255628515|gb|ACU14602.1|/1.26901e-17/unknown [Glycine max]																				Glyma19g32780	18.12	47.11	1.37845	gi|255627053|gb|ACU13871.1|/1.0235e-77/unknown [Glycine max]		Glyma17g13820	89.55	28.23	-1.66546	gi|255630988|gb|ACU15858.1|/4.28498e-43/unknown [Glycine max]
												Glyma01g06030	26.35	53.29	1.01606	gi|255647759|gb|ACU24340.1|/1.15364e-121/unknown [Glycine max]																				Glyma17g10520	12.49	32.47	1.37833	gi|255646614|gb|ACU23781.1|/3.17797e-157/unknown [Glycine max]		Glyma13g27050	196.17	61.75	-1.66759	gi|255645920|gb|ACU23449.1|/6.71826e-33/unknown [Glycine max]
												Glyma02g44710	11.81	23.86	1.01459	gi|217071004|gb|ACJ83862.1|/2.794e-64/unknown [Medicago truncatula]																				Glyma13g28880	27.09	70.4	1.37782	gi|255636971|gb|ACU18818.1|/2.01868e-174/unknown [Glycine max]		Glyma20g34780	20.76	6.53	-1.66865	gi|255647775|gb|ACU24348.1|/0/unknown [Glycine max]
												Glyma18g04470	10.18	20.55	1.0134	gi|255627881|gb|ACU14285.1|/3.58424e-86/unknown [Glycine max]																				Glyma06g09750	6.33	16.41	1.3743	gi|255629243|gb|ACU14966.1|/4.43008e-115/unknown [Glycine max]		Glyma04g40450	313.52	97.93	-1.67873	gi|255646322|gb|ACU23644.1|/0/unknown [Glycine max]
												Glyma10g02450	44.88	90.39	1.01009	gi|255631386|gb|ACU16060.1|/2.37685e-32/unknown [Glycine max]																				Glyma05g32170	7.57	19.59	1.37175	gi|255640318|gb|ACU20447.1|/6.30999e-103/unknown [Glycine max]		Glyma18g52210	18.65	5.82	-1.68008	gi|255647733|gb|ACU24327.1|/2.02377e-40/unknown [Glycine max]
												Glyma05g38340	64.51	129.92	1.01003	gi|255638124|gb|ACU19376.1|/2.27938e-140/unknown [Glycine max]																				Glyma19g31260	4.57	11.82	1.37096	gi|255634524|gb|ACU17625.1|/2.93037e-154/unknown [Glycine max]		Glyma14g40220	52.6	16.41	-1.68049	gi|255640776|gb|ACU20672.1|/2.0699e-173/unknown [Glycine max]
												Glyma09g11740	26.89	53.99	1.00562	gi|255638122|gb|ACU19375.1|/8.23099e-169/unknown [Glycine max]																				Glyma06g17680	10.73	27.7	1.36824	gi|255635024|gb|ACU17870.1|/1.02599e-86/unknown [Glycine max]		Glyma10g28900	7.92	2.47	-1.68099	gi|255626017|gb|ACU13353.1|/1.18662e-83/unknown [Glycine max]
												Glyma02g14140	17.44	35.01	1.00537	gi|255640979|gb|ACU20769.1|/1.59922e-171/unknown [Glycine max]																				Glyma19g18340	10.2	26.29	1.36594	gi|255627257|gb|ACU13973.1|/3.21878e-91/unknown [Glycine max]		Glyma17g15420	23.22	7.23	-1.6833	gi|255639984|gb|ACU20284.1|/0/unknown [Glycine max]
												Glyma20g24580	15.63	31.35	1.00415	gi|255627011|gb|ACU13850.1|/1.08249e-45/unknown [Glycine max]																				Glyma13g07790	4.93	12.7	1.36517	gi|255629621|gb|ACU15158.1|/7.60886e-52/unknown [Glycine max]		Glyma08g23680	17.59	5.47	-1.68514	gi|255644601|gb|ACU22803.1|/0/unknown [Glycine max]
												Glyma13g03290	13.99	28.04	1.00309	gi|255635700|gb|ACU18199.1|/1.71437e-94/unknown [Glycine max]																				Glyma10g42190	10.56	27.17	1.3634	gi|255645090|gb|ACU23044.1|/2.43966e-109/unknown [Glycine max]		Glyma11g37030	17.59	5.47	-1.68514	gi|255627741|gb|ACU14215.1|/3.99484e-93/unknown [Glycine max]
												Glyma04g37620	14.36	28.74	1.001	gi|255632398|gb|ACU16549.1|/5.70494e-137/unknown [Glycine max]																				Glyma10g01690	10.91	28.05	1.36235	gi|255628807|gb|ACU14748.1|/1.15005e-88/unknown [Glycine max]		Glyma08g15470	15.31	4.76	-1.68544	gi|255630800|gb|ACU15761.1|/1.51747e-40/unknown [Glycine max]
																																				Glyma13g41410	4.05	10.41	1.36198	gi|255626357|gb|ACU13523.1|/1.53512e-50/unknown [Glycine max]		Glyma01g04750	14.78	4.59	-1.68708	gi|255636393|gb|ACU18535.1|/8.27852e-111/unknown [Glycine max]
																																				Glyma12g22360	4.4	11.29	1.35947	gi|255635528|gb|ACU18115.1|/0/unknown [Glycine max]		Glyma02g44710	39.23	12.17	-1.68863	gi|217071004|gb|ACJ83862.1|/2.794e-64/unknown [Medicago truncatula]
																																				Glyma07g29440	6.33	16.23	1.35839	gi|217074674|gb|ACJ85697.1|/0/unknown [Medicago truncatula]		Glyma14g04350	43.81	13.59	-1.68871	gi|255646535|gb|ACU23742.1|/2.09462e-86/unknown [Glycine max]
																																				Glyma18g53410	7.92	20.29	1.3572	gi|255640685|gb|ACU20627.1|/3.45259e-88/unknown [Glycine max]		Glyma17g34750	18.83	5.82	-1.69394	gi|255647370|gb|ACU24151.1|/3.49533e-155/unknown [Glycine max]
																																				Glyma06g02590	3.52	9	1.35435	gi|255641397|gb|ACU20975.1|/2.53557e-74/unknown [Glycine max]		Glyma06g42180	207.96	64.22	-1.69521	gi|255631820|gb|ACU16277.1|/3.74443e-58/unknown [Glycine max]
																																				Glyma10g42730	10.56	27	1.35435	gi|255630399|gb|ACU15556.1|/2.6227e-58/unknown [Glycine max]		Glyma04g42740	9.15	2.82	-1.69808	gi|217074984|gb|ACJ85852.1|/0/unknown [Medicago truncatula]
																																				Glyma13g16680	7.04	18	1.35435	gi|255627483|gb|ACU14086.1|/1.04093e-79/unknown [Glycine max]		Glyma09g25940	55.95	17.11	-1.7093	gi|217072942|gb|ACJ84831.1|/7.53014e-65/unknown [Medicago truncatula]
																																				Glyma02g11890	14.25	36.35	1.35099	gi|217074996|gb|ACJ85858.1|/0/unknown [Medicago truncatula]		Glyma12g32390	22.52	6.88	-1.71073	gi|255647438|gb|ACU24183.1|/1.15925e-161/unknown [Glycine max]
																																				Glyma20g38130	19.35	49.23	1.3472	gi|255629506|gb|ACU15099.1|/6.00642e-92/unknown [Glycine max]		Glyma09g02030	16.19	4.94	-1.71252	gi|255636439|gb|ACU18558.1|/6.89311e-180/unknown [Glycine max]
																																				Glyma10g03750	405	1028.48	1.34452	gi|255626603|gb|ACU13646.1|/1.40064e-28/unknown [Glycine max]		Glyma08g17890	9.85	3	-1.71516	gi|255633722|gb|ACU17221.1|/1.41105e-62/unknown [Glycine max]
																																				Glyma15g23480	7.39	18.7	1.33939	gi|255638122|gb|ACU19375.1|/2.7295e-162/unknown [Glycine max]		Glyma10g44480	9.85	3	-1.71516	gi|255637879|gb|ACU19258.1|/3.02804e-158/unknown [Glycine max]
																																				Glyma04g23980	34.31	86.81	1.33923	gi|255647122|gb|ACU24029.1|/1.03021e-149/unknown [Glycine max]		Glyma16g32810	29.56	9	-1.71565	gi|255628565|gb|ACU14627.1|/2.20111e-35/unknown [Glycine max]
																																				Glyma09g30370	4.75	12	1.33703	gi|255635501|gb|ACU18102.1|/7.70886e-162/unknown [Glycine max]		Glyma11g26240	15.66	4.76	-1.71805	gi|255628231|gb|ACU14460.1|/3.05647e-126/unknown [Glycine max]
																																				Glyma17g09580	4.05	10.23	1.33681	gi|217073316|gb|ACJ85017.1|/3.28079e-88/unknown [Medicago truncatula]		Glyma02g45430	30.79	9.35	-1.71942	gi|255631354|gb|ACU16044.1|/3.54915e-100/unknown [Glycine max]
																																				Glyma17g37310	4.05	10.23	1.33681	gi|255638634|gb|ACU19622.1|/7.66059e-109/unknown [Glycine max]		Glyma08g02840	112.77	34.23	-1.72005	gi|255634801|gb|ACU17761.1|/1.84954e-82/unknown [Glycine max]
																																				Glyma05g02860	9.15	23.11	1.33667	gi|255645725|gb|ACU23356.1|/7.80863e-22/unknown [Glycine max]		Glyma18g49950	19.18	5.82	-1.72051	gi|255627285|gb|ACU13987.1|/2.20803e-60/unknown [Glycine max]
																																				Glyma13g22090	9.15	23.11	1.33667	gi|255637870|gb|ACU19254.1|/1.74035e-29/unknown [Glycine max]		Glyma13g01740	7.57	2.29	-1.72495	gi|255644898|gb|ACU22949.1|/1.43627e-68/unknown [Glycine max]
																																				Glyma06g46370	5.1	12.88	1.33656	gi|255641962|gb|ACU21248.1|/1.89629e-97/unknown [Glycine max]		Glyma07g10820	12.84	3.88	-1.72652	gi|255628557|gb|ACU14623.1|/4.40809e-37/unknown [Glycine max]
																																				Glyma01g07930	18.12	45.7	1.33461	gi|255645037|gb|ACU23018.1|/0/unknown [Glycine max]		Glyma08g03450	16.36	4.94	-1.72759	gi|255628301|gb|ACU14495.1|/1.70902e-67/unknown [Glycine max]
																																				Glyma08g02070	18.47	46.58	1.33453	gi|255630351|gb|ACU15532.1|/1.7003e-50/unknown [Glycine max]		Glyma01g06270	7.04	2.12	-1.73151	gi|255629147|gb|ACU14918.1|/5.05768e-97/unknown [Glycine max]
																																				Glyma19g17920	19.53	49.23	1.33385	gi|255641143|gb|ACU20849.1|/4.25538e-130/unknown [Glycine max]		Glyma04g00760	7.04	2.12	-1.73151	gi|255645423|gb|ACU23207.1|/2.30225e-140/unknown [Glycine max]
																																				Glyma18g10170	8.62	21.7	1.33194	gi|255635473|gb|ACU18089.1|/0/unknown [Glycine max]		Glyma04g04710	8.8	2.65	-1.73151	gi|255641686|gb|ACU21115.1|/0/unknown [Glycine max]
																																				Glyma13g27840	276.4	693.95	1.32807	gi|255647537|gb|ACU24232.1|/0/unknown [Glycine max]		Glyma07g06050	8.8	2.65	-1.73151	gi|255627845|gb|ACU14267.1|/1.20893e-117/unknown [Glycine max]
																																				Glyma10g20590	9.5	23.82	1.32617	gi|255646737|gb|ACU23842.1|/9.40457e-127/unknown [Glycine max]		Glyma12g31700	29.38	8.82	-1.73598	gi|255637379|gb|ACU19018.1|/3.86637e-167/unknown [Glycine max]
																																				Glyma11g02130	19	47.64	1.32617	gi|255625603|gb|ACU13146.1|/6.98761e-22/unknown [Glycine max]		Glyma18g05590	17.77	5.29	-1.7481	gi|255626549|gb|ACU13619.1|/1.8605e-65/unknown [Glycine max]
																																				Glyma08g03580	19.7	49.23	1.32134	gi|217075747|gb|ACJ86233.1|/0/unknown [Medicago truncatula]		Glyma17g12430	10.73	3.18	-1.75455	gi|255632312|gb|ACU16514.1|/3.70704e-55/unknown [Glycine max]
																																				Glyma16g18370	7.21	18	1.31993	gi|255631224|gb|ACU15979.1|/6.39434e-119/unknown [Glycine max]		Glyma05g23880	7.74	2.29	-1.75699	gi|255647291|gb|ACU24112.1|/8.28035e-105/unknown [Glycine max]
																																				Glyma16g13580	5.81	14.47	1.31645	gi|255640596|gb|ACU20583.1|/1.52626e-111/unknown [Glycine max]		Glyma08g13210	35.19	10.41	-1.7572	gi|255648032|gb|ACU24472.1|/0/unknown [Glycine max]
																																				Glyma12g02230	5.1	12.7	1.31626	gi|255637349|gb|ACU19004.1|/0/unknown [Glycine max]		Glyma10g40580	35.19	10.41	-1.7572	gi|255632548|gb|ACU16624.1|/1.65715e-40/unknown [Glycine max]
																																				Glyma01g41460	4.05	10.06	1.31264	gi|255646144|gb|ACU23558.1|/0/unknown [Glycine max]		Glyma06g14170	16.71	4.94	-1.75813	gi|15238541|ref|NP_197834.1|/1.18735e-64/unknown protein [Arabidopsis thaliana]
																																				Glyma17g10990	38.71	95.98	1.31003	gi|255647180|gb|ACU24058.1|/8.4472e-144/unknown [Glycine max]		Glyma08g16210	47.85	14.12	-1.76078	gi|255638690|gb|ACU19650.1|/4.82868e-129/unknown [Glycine max]
																																				Glyma18g47760	15.66	38.82	1.30972	gi|255630950|gb|ACU15838.1|/2.00688e-89/unknown [Glycine max]		Glyma01g38750	1361.39	401.58	-1.76132	gi|255645939|gb|ACU23458.1|/6.71054e-175/unknown [Glycine max]
																																				Glyma11g06480	14.95	37.05	1.30933	gi|255635983|gb|ACU18337.1|/0/unknown [Glycine max]		Glyma06g05530	7.21	2.12	-1.76593	gi|255635522|gb|ACU18112.1|/0/unknown [Glycine max]
																																				Glyma05g38120	7.92	19.59	1.30655	gi|255636196|gb|ACU18439.1|/3.11571e-166/unknown [Glycine max]		Glyma11g01000	13.2	3.88	-1.76641	gi|255633076|gb|ACU16893.1|/1.5229e-56/unknown [Glycine max]
																																				Glyma13g22100	11.79	29.11	1.30395	gi|255633204|gb|ACU16958.1|/1.451e-77/unknown [Glycine max]		Glyma08g02250	174.18	51.17	-1.76721	gi|255641581|gb|ACU21063.1|/1.67072e-125/unknown [Glycine max]
																																				Glyma12g31600	9.15	22.58	1.3032	gi|30688302|ref|NP_680193.2|/1.19193e-121/unknown protein [Arabidopsis thaliana]		Glyma02g41250	77.59	22.76	-1.76937	gi|255636073|gb|ACU18381.1|/1.6748e-169/unknown [Glycine max]
																																				Glyma07g00970	4.22	10.41	1.30266	gi|217074730|gb|ACJ85725.1|/0/unknown [Medicago truncatula]		Glyma19g39570	114.89	33.7	-1.76943	gi|255631934|gb|ACU16334.1|/1.44197e-93/unknown [Glycine max]
																																				Glyma06g20800	21.46	52.93	1.30244	gi|255639323|gb|ACU19959.1|/4.90334e-137/unknown [Glycine max]		Glyma10g41130	11.44	3.35	-1.77185	gi|255640808|gb|ACU20687.1|/1.16587e-80/unknown [Glycine max]
																																				Glyma13g33000	8.8	21.7	1.30212	gi|255626551|gb|ACU13620.1|/7.73465e-83/unknown [Glycine max]		Glyma14g23960	12.67	3.71	-1.77193	gi|255545384|ref|XP_002513752.1|/7.2287e-148/protein with unknown function [Ricinus communis]
																																				Glyma06g03350	55.24	136.04	1.30025	gi|255635266|gb|ACU17987.1|/0/unknown [Glycine max]		Glyma02g05950	8.44	2.47	-1.77273	gi|255647389|gb|ACU24160.1|/0/unknown [Glycine max]
																																				Glyma08g36350	138.99	341.77	1.29804	gi|255646184|gb|ACU23577.1|/0/unknown [Glycine max]		Glyma13g27960	8.44	2.47	-1.77273	gi|255646580|gb|ACU23764.1|/1.02547e-122/unknown [Glycine max]
																																				Glyma06g24420	41.52	101.98	1.29641	gi|255631054|gb|ACU15891.1|/2.18441e-21/unknown [Glycine max]		Glyma03g06420	13.9	4.06	-1.77553	gi|255637227|gb|ACU18944.1|/6.14113e-105/unknown [Glycine max]
																																				Glyma10g11830	4.75	11.65	1.29433	gi|255647124|gb|ACU24030.1|/4.0401e-114/unknown [Glycine max]		Glyma03g31470	76.53	22.23	-1.78352	gi|255627331|gb|ACU14010.1|/5.84328e-91/unknown [Glycine max]
																																				Glyma15g06210	80.05	196.2	1.29335	gi|255629932|gb|ACU15318.1|/2.85218e-49/unknown [Glycine max]		Glyma17g08700	13.37	3.88	-1.78487	gi|255646929|gb|ACU23934.1|/2.26819e-22/unknown [Glycine max]
																																				Glyma18g01730	7.92	19.41	1.29323	gi|255628887|gb|ACU14788.1|/2.38042e-99/unknown [Glycine max]		Glyma07g19250	29.21	8.47	-1.78603	gi|255629095|gb|ACU14892.1|/2.94312e-59/unknown [Glycine max]
																																				Glyma06g03910	5.98	14.64	1.2917	gi|255628973|gb|ACU14831.1|/4.14565e-128/unknown [Glycine max]		Glyma08g40510	52.96	15.35	-1.78666	gi|255629185|gb|ACU14937.1|/1.6162e-34/unknown [Glycine max]
																																				Glyma08g39880	7.21	17.64	1.29078	gi|255638486|gb|ACU19552.1|/6.47704e-135/unknown [Glycine max]		Glyma09g00980	14.07	4.06	-1.79307	gi|255635327|gb|ACU18017.1|/6.2414e-166/unknown [Glycine max]
																																				Glyma06g41370	32.2	78.69	1.28912	gi|255629784|gb|ACU15241.1|/3.07037e-44/unknown [Glycine max]		Glyma03g33070	162.39	46.58	-1.80168	gi|255631105|gb|ACU15918.1|/6.94268e-88/unknown [Glycine max]
																																				Glyma19g25570	17.77	43.4	1.28825	gi|255626823|gb|ACU13756.1|/1.66804e-65/unknown [Glycine max]		Glyma07g03620	8.62	2.47	-1.80318	gi|255627109|gb|ACU13899.1|/3.87496e-75/unknown [Glycine max]
																																				Glyma02g41890	4.05	9.88	1.28659	gi|255644439|gb|ACU22724.1|/0/unknown [Glycine max]		Glyma08g03540	27.09	7.76	-1.80363	gi|255646789|gb|ACU23866.1|/0/unknown [Glycine max]
																																				Glyma09g25500	41.34	100.75	1.28517	gi|255637529|gb|ACU19091.1|/3.4205e-112/unknown [Glycine max]		Glyma01g06800	6.16	1.76	-1.80735	gi|255635754|gb|ACU18226.1|/1.85599e-141/unknown [Glycine max]
																																				Glyma02g43920	29.03	70.4	1.27803	gi|255626735|gb|ACU13712.1|/7.77587e-75/unknown [Glycine max]		Glyma19g44260	9.32	2.65	-1.81434	gi|255635554|gb|ACU18127.1|/0/unknown [Glycine max]
																																				Glyma06g20980	4.22	10.23	1.27749	gi|255635660|gb|ACU18179.1|/6.78911e-158/unknown [Glycine max]		Glyma16g05090	60.87	17.29	-1.81579	gi|255628189|gb|ACU14439.1|/4.23339e-37/unknown [Glycine max]
																																				Glyma06g45930	11.44	27.7	1.2758	gi|255637282|gb|ACU18971.1|/6.48298e-58/unknown [Glycine max]		Glyma08g12030	163.8	46.23	-1.82503	gi|255633192|gb|ACU16952.1|/1.55393e-54/unknown [Glycine max]
																																				Glyma09g36640	18.47	44.64	1.27315	gi|255625847|gb|ACU13268.1|/2.95932e-99/unknown [Glycine max]		Glyma08g28770	10.03	2.82	-1.83055	gi|255634612|gb|ACU17668.1|/1.38259e-114/unknown [Glycine max]
																																				Glyma01g00570	16.89	40.76	1.27098	gi|255637772|gb|ACU19208.1|/7.74136e-96/unknown [Glycine max]		Glyma11g14650	11.96	3.35	-1.83598	gi|255635068|gb|ACU17892.1|/3.04788e-116/unknown [Glycine max]
																																				Glyma01g11870	467.99	1129.23	1.27079	gi|255630669|gb|ACU15694.1|/2.47372e-101/unknown [Glycine max]		Glyma02g16100	54.19	15.17	-1.83681	gi|255636182|gb|ACU18433.1|/8.98699e-114/unknown [Glycine max]
																																				Glyma08g15010	31.84	76.75	1.26933	gi|255627455|gb|ACU14072.1|/1.93848e-45/unknown [Glycine max]		Glyma15g11930	9.5	2.65	-1.84194	gi|255647128|gb|ACU24032.1|/3.05482e-165/unknown [Glycine max]
																																				Glyma15g03320	7.92	19.06	1.26698	gi|255636437|gb|ACU18557.1|/7.90504e-168/unknown [Glycine max]		Glyma02g41820	47.5	13.23	-1.84411	gi|255641861|gb|ACU21199.1|/0/unknown [Glycine max]
																																				Glyma07g06330	27.97	67.05	1.26136	gi|255631712|gb|ACU16223.1|/2.73615e-08/unknown [Glycine max]		Glyma08g07900	14.6	4.06	-1.84642	gi|255647202|gb|ACU24069.1|/1.24563e-82/unknown [Glycine max]
																																				Glyma05g14430	8.62	20.64	1.25968	gi|255627257|gb|ACU13973.1|/5.68921e-108/unknown [Glycine max]		Glyma20g08830	6.33	1.76	-1.84663	gi|255646513|gb|ACU23734.1|/0/unknown [Glycine max]
																																				Glyma04g06580	20.58	49.23	1.25829	gi|255648004|gb|ACU24458.1|/8.05149e-110/unknown [Glycine max]		Glyma02g06120	11.44	3.18	-1.84699	gi|255645323|gb|ACU23158.1|/6.09042e-157/unknown [Glycine max]
																																				Glyma17g35530	107.85	257.43	1.25515	gi|255629301|gb|ACU14995.1|/3.27394e-34/unknown [Glycine max]		Glyma06g12470	113.65	31.41	-1.8553	gi|255638774|gb|ACU19691.1|/0/unknown [Glycine max]
																																				Glyma02g42330	7.92	18.88	1.25329	gi|255633474|gb|ACU17095.1|/1.55383e-78/unknown [Glycine max]		Glyma18g31330	14.78	4.06	-1.86409	gi|255635837|gb|ACU18266.1|/1.89966e-172/unknown [Glycine max]
																																				Glyma05g26000	22.52	53.64	1.2521	gi|255645253|gb|ACU23124.1|/5.36091e-143/unknown [Glycine max]		Glyma04g36430	9.68	2.65	-1.86901	gi|255635264|gb|ACU17986.1|/3.43683e-128/unknown [Glycine max]
																																				Glyma03g29880	21.64	51.52	1.25143	gi|255633032|gb|ACU16871.1|/1.92375e-77/unknown [Glycine max]		Glyma09g15750	23.93	6.53	-1.87367	gi|255631646|gb|ACU16190.1|/2.31042e-78/unknown [Glycine max]
																																				Glyma02g16000	445.12	1059.71	1.2514	gi|255626853|gb|ACU13771.1|/5.09026e-42/unknown [Glycine max]		Glyma10g43010	42.05	11.47	-1.87424	gi|255632436|gb|ACU16568.1|/5.9341e-103/unknown [Glycine max]
																																				Glyma02g11750	7.04	16.76	1.25137	gi|255631280|gb|ACU16007.1|/2.24854e-91/unknown [Glycine max]		Glyma02g35630	136	37.05	-1.87606	gi|255647490|gb|ACU24209.1|/3.00177e-78/unknown [Glycine max]
																																				Glyma06g19850	38.35	91.22	1.25012	gi|255626579|gb|ACU13634.1|/1.27934e-51/unknown [Glycine max]		Glyma05g34090	14.95	4.06	-1.88059	gi|255642441|gb|ACU21484.1|/5.00108e-120/unknown [Glycine max]
																																				Glyma15g04000	5.28	12.53	1.24678	gi|255645933|gb|ACU23455.1|/0/unknown [Glycine max]		Glyma13g44700	32.55	8.82	-1.88381	gi|255637972|gb|ACU19302.1|/8.31923e-176/unknown [Glycine max]
																																				Glyma10g31810	8.27	19.59	1.24416	gi|255636939|gb|ACU18802.1|/9.53915e-106/unknown [Glycine max]		Glyma12g03700	11.08	3	-1.88492	gi|255636643|gb|ACU18659.1|/0/unknown [Glycine max]
																																				Glyma08g45310	19.18	45.35	1.2415	gi|255630593|gb|ACU15656.1|/8.06549e-35/unknown [Glycine max]		Glyma02g04980	6.51	1.76	-1.88708	gi|255629542|gb|ACU15118.1|/2.41088e-60/unknown [Glycine max]
																																				Glyma10g42060	4.93	11.65	1.24067	gi|255638350|gb|ACU19487.1|/3.01712e-62/unknown [Glycine max]		Glyma08g11840	22.87	6.18	-1.88778	gi|255625793|gb|ACU13241.1|/1.39903e-100/unknown [Glycine max]
																																				Glyma03g29800	69.85	164.97	1.23987	gi|255628657|gb|ACU14673.1|/6.70991e-64/unknown [Glycine max]		Glyma05g31960	15.66	4.23	-1.88835	gi|255648283|gb|ACU24594.1|/6.87841e-122/unknown [Glycine max]
																																				Glyma15g12880	14.43	34.05	1.23858	gi|255637328|gb|ACU18994.1|/5.13735e-103/unknown [Glycine max]		Glyma15g11240	57.53	15.53	-1.88926	gi|255631183|gb|ACU15957.1|/3.81198e-62/unknown [Glycine max]
																																				Glyma20g28420	15.48	36.52	1.23828	gi|255636091|gb|ACU18390.1|/2.38229e-138/unknown [Glycine max]		Glyma16g25860	1172.96	314.6	-1.89856	gi|255634951|gb|ACU17834.1|/6.27279e-164/unknown [Glycine max]
																																				Glyma09g36340	7.04	16.59	1.23667	gi|255640268|gb|ACU20424.1|/0/unknown [Glycine max]		Glyma04g08410	64.22	17.11	-1.90818	gi|255638370|gb|ACU19496.1|/2.31709e-157/unknown [Glycine max]
																																				Glyma15g05170	20.23	47.64	1.23568	gi|255636134|gb|ACU18410.1|/5.96537e-38/unknown [Glycine max]		Glyma09g03300	8.62	2.29	-1.91234	gi|255639159|gb|ACU19879.1|/0/unknown [Glycine max]
																																				Glyma09g06860	10.2	24	1.23447	gi|255628485|gb|ACU14587.1|/1.90486e-125/unknown [Glycine max]		Glyma06g44990	130.9	34.76	-1.91297	gi|255646173|gb|ACU23572.1|/0/unknown [Glycine max]
																																				Glyma06g01760	5.63	13.23	1.23261	gi|255635109|gb|ACU17912.1|/8.06762e-180/unknown [Glycine max]		Glyma07g07870	19.35	5.12	-1.91812	gi|255645533|gb|ACU23261.1|/3.91947e-144/unknown [Glycine max]
																																				Glyma13g42360	12.84	30.17	1.23247	gi|255642429|gb|ACU21478.1|/0/unknown [Glycine max]		Glyma17g10650	26.04	6.88	-1.92025	gi|255635026|gb|ACU17871.1|/2.05638e-106/unknown [Glycine max]
																																				Glyma09g39890	36.95	86.81	1.23229	gi|255631706|gb|ACU16220.1|/2.26141e-65/unknown [Glycine max]		Glyma08g26430	10.03	2.65	-1.92026	gi|255627285|gb|ACU13987.1|/1.74858e-50/unknown [Glycine max]
																																				Glyma09g31670	77.59	182.26	1.23206	gi|255625825|gb|ACU13257.1|/1.05842e-72/unknown [Glycine max]		Glyma07g02480	6.69	1.76	-1.92643	gi|255637318|gb|ACU18989.1|/9.0861e-67/unknown [Glycine max]
																																				Glyma07g04740	6.33	14.82	1.22727	gi|255641479|gb|ACU21015.1|/5.52115e-115/unknown [Glycine max]		Glyma17g10150	7.39	1.94	-1.92952	gi|255647901|gb|ACU24409.1|/1.37146e-107/unknown [Glycine max]
																																				Glyma10g02210	250	585.08	1.22671	gi|255628323|gb|ACU14506.1|/8.2395e-45/unknown [Glycine max]		Glyma03g31500	12.14	3.18	-1.93267	gi|255634482|gb|ACU17605.1|/3.62335e-132/unknown [Glycine max]
																																				Glyma14g08400	17.77	41.46	1.22228	gi|255635102|gb|ACU17909.1|/0/unknown [Glycine max]		Glyma01g41580	12.84	3.35	-1.93841	gi|217072862|gb|ACJ84791.1|/2.22928e-81/unknown [Medicago truncatula]
																																				Glyma20g30250	8.62	20.11	1.22215	gi|255634506|gb|ACU17617.1|/6.82379e-103/unknown [Glycine max]		Glyma09g04290	31.14	8.12	-1.93922	gi|255629279|gb|ACU14984.1|/1.6874e-107/unknown [Glycine max]
																																				Glyma10g39050	103.63	241.73	1.22195	gi|255642505|gb|ACU21516.1|/9.44435e-130/unknown [Glycine max]		Glyma10g38910	660.11	171.85	-1.94156	gi|255628341|gb|ACU14515.1|/5.72424e-75/unknown [Glycine max]
																																				Glyma03g30220	23.93	55.76	1.22041	gi|255640849|gb|ACU20707.1|/4.81769e-109/unknown [Glycine max]		Glyma11g15200	8.8	2.29	-1.94216	gi|255634955|gb|ACU17836.1|/1.47042e-139/unknown [Glycine max]
																																				Glyma10g44230	9.85	22.94	1.21967	gi|145331105|ref|NP_001078044.1|/1.05741e-15/unknown protein [Arabidopsis thaliana]		Glyma02g01210	105.21	27.35	-1.94366	gi|255637121|gb|ACU18892.1|/0/unknown [Glycine max]
																																				Glyma01g43850	11.44	26.64	1.21951	gi|255629885|gb|ACU15293.1|/1.14437e-90/unknown [Glycine max]		Glyma06g16250	21.11	5.47	-1.94831	gi|255637253|gb|ACU18957.1|/4.88665e-33/unknown [Glycine max]
																																				Glyma03g38990	169.07	393.64	1.21926	gi|255629209|gb|ACU14949.1|/5.0932e-90/unknown [Glycine max]		Glyma11g03380	10.91	2.82	-1.95188	gi|255637229|gb|ACU18945.1|/3.97729e-164/unknown [Glycine max]
																																				Glyma19g34410	711.66	1655.55	1.21805	gi|255627917|gb|ACU14303.1|/1.63369e-48/unknown [Glycine max]		Glyma16g01550	17.77	4.59	-1.95288	gi|255647062|gb|ACU23999.1|/6.58197e-85/unknown [Glycine max]
																																				Glyma10g23460	8.27	19.23	1.2174	gi|255630488|gb|ACU15602.1|/3.62979e-126/unknown [Glycine max]		Glyma06g41930	6.16	1.59	-1.9539	gi|255647400|gb|ACU24165.1|/6.77677e-110/unknown [Glycine max]
																																				Glyma10g28080	14.43	33.52	1.21595	gi|255639778|gb|ACU20182.1|/0/unknown [Glycine max]		Glyma14g39560	6.16	1.59	-1.9539	gi|255648026|gb|ACU24469.1|/1.32653e-75/unknown [Glycine max]
																																				Glyma02g46140	6.69	15.53	1.21498	gi|255639475|gb|ACU20032.1|/3.10165e-180/unknown [Glycine max]		Glyma08g13160	113.13	29.11	-1.95839	gi|255639295|gb|ACU19945.1|/2.3171e-159/unknown [Glycine max]
																																				Glyma08g45450	8.44	19.59	1.2148	gi|255641835|gb|ACU21186.1|/1.85148e-150/unknown [Glycine max]		Glyma07g16310	58.23	14.82	-1.97422	gi|255634733|gb|ACU17728.1|/1.40168e-136/unknown [Glycine max]
																																				Glyma17g01030	24.28	56.28	1.21285	gi|22597168|gb|AAN03471.1|/3.33544e-35/unknown protein [Glycine max]		Glyma12g22160	48.56	12.35	-1.97526	gi|217072604|gb|ACJ84662.1|/1.79389e-67/unknown [Medicago truncatula]
																																				Glyma06g46690	19.18	44.29	1.20738	gi|255635143|gb|ACU17928.1|/2.60877e-84/unknown [Glycine max]		Glyma15g09700	30.09	7.59	-1.98711	gi|255642503|gb|ACU21515.1|/0/unknown [Glycine max]
																																				Glyma19g33330	14.6	33.7	1.20678	gi|255628051|gb|ACU14370.1|/1.82344e-101/unknown [Glycine max]		Glyma14g05550	156.93	39.52	-1.98947	gi|255646175|gb|ACU23573.1|/0/unknown [Glycine max]
																																				Glyma08g39390	32.9	75.87	1.20544	gi|217074414|gb|ACJ85567.1|/0/unknown [Medicago truncatula]		Glyma10g37970	6.33	1.59	-1.99318	gi|217073290|gb|ACJ85004.1|/2.84354e-84/unknown [Medicago truncatula]
																																				Glyma09g37590	16.54	38.11	1.20421	gi|255630802|gb|ACU15762.1|/4.47491e-71/unknown [Glycine max]		Glyma10g29560	9.15	2.29	-1.99842	gi|255634741|gb|ACU17732.1|/1.36093e-100/unknown [Glycine max]
																																				Glyma12g28940	9.5	21.88	1.20361	gi|255647985|gb|ACU24449.1|/2.06991e-157/unknown [Glycine max]		Glyma13g31750	9.15	2.29	-1.99842	gi|255631430|gb|ACU16082.1|/4.61781e-89/unknown [Glycine max]
																																				Glyma12g35600	28.15	64.75	1.20175	gi|217072908|gb|ACJ84814.1|/2.90071e-81/unknown [Medicago truncatula]		Glyma15g09260	138.99	34.76	-1.99948	gi|217074982|gb|ACJ85851.1|/0/unknown [Medicago truncatula]
																																				Glyma19g44520	5.45	12.53	1.20106	gi|255646626|gb|ACU23787.1|/8.71117e-171/unknown [Glycine max]		Glyma02g03950	17.07	4.23	-2.01273	gi|255628775|gb|ACU14732.1|/5.56543e-28/unknown [Glycine max]
																																				Glyma09g34090	9.85	22.58	1.19685	gi|255634634|gb|ACU17679.1|/6.83875e-140/unknown [Glycine max]		Glyma04g03620	10.73	2.65	-2.01759	gi|255641384|gb|ACU20969.1|/2.54121e-120/unknown [Glycine max]
																																				Glyma08g46900	6.16	14.12	1.19674	gi|118486134|gb|ABK94910.1|/1.60004e-118/unknown [Populus trichocarpa]		Glyma19g41420	28.68	7.06	-2.0223	gi|255641498|gb|ACU21024.1|/0/unknown [Glycine max]
																																				Glyma11g37920	60.35	138.15	1.19481	gi|217073376|gb|ACJ85047.1|/1.94382e-90/unknown [Medicago truncatula]		Glyma04g34960	65.27	16.06	-2.02295	gi|255627921|gb|ACU14305.1|/1.40649e-49/unknown [Glycine max]
																																				Glyma01g03670	5.63	12.88	1.19393	gi|255646313|gb|ACU23640.1|/1.19059e-38/unknown [Glycine max]		Glyma13g01370	17.95	4.41	-2.02513	gi|255642295|gb|ACU21412.1|/0/unknown [Glycine max]
																																				Glyma17g11370	10.73	24.53	1.1929	gi|255630097|gb|ACU15402.1|/3.64172e-51/unknown [Glycine max]		Glyma13g06690	15.13	3.71	-2.02792	gi|255636872|gb|ACU18769.1|/0/unknown [Glycine max]
																																				Glyma02g44690	6.33	14.47	1.19279	gi|255640000|gb|ACU20291.1|/0/unknown [Glycine max]		Glyma08g21790	6.51	1.59	-2.03363	gi|255628277|gb|ACU14483.1|/9.44827e-96/unknown [Glycine max]
																																				Glyma03g21680	25.16	57.34	1.18841	gi|255625633|gb|ACU13161.1|/1.32551e-79/unknown [Glycine max]		Glyma07g32980	33.96	8.29	-2.03439	gi|255632876|gb|ACU16791.1|/7.22199e-87/unknown [Glycine max]
																																				Glyma10g35000	9.68	22.06	1.18835	gi|255632960|gb|ACU16834.1|/6.63009e-06/unknown [Glycine max]		Glyma16g06210	5.1	1.24	-2.04016	gi|255628591|gb|ACU14640.1|/8.66634e-68/unknown [Glycine max]
																																				Glyma02g06180	7.21	16.41	1.1865	gi|255646239|gb|ACU23604.1|/0/unknown [Glycine max]		Glyma07g39500	11.61	2.82	-2.0416	gi|255639818|gb|ACU20202.1|/9.34165e-141/unknown [Glycine max]
																																				Glyma13g07630	5.98	13.59	1.18433	gi|255648281|gb|ACU24593.1|/0/unknown [Glycine max]		Glyma14g00780	5.81	1.41	-2.04284	gi|18397903|ref|NP_564378.1|/2.14649e-22/unknown protein [Arabidopsis thaliana]
																																				Glyma01g05880	5.45	12.35	1.18018	gi|255626575|gb|ACU13632.1|/2.20486e-81/unknown [Glycine max]		Glyma12g04830	71.43	17.29	-2.04659	gi|255626165|gb|ACU13427.1|/1.09355e-116/unknown [Glycine max]
																																				Glyma09g11870	20.06	45.35	1.17678	gi|255631580|gb|ACU16157.1|/6.54959e-99/unknown [Glycine max]		Glyma01g28520	20.58	4.94	-2.05866	gi|255645345|gb|ACU23169.1|/0/unknown [Glycine max]
																																				Glyma03g37080	9.68	21.88	1.17653	gi|255647576|gb|ACU24251.1|/2.10447e-162/unknown [Glycine max]		Glyma18g02910	20.58	4.94	-2.05866	gi|255625829|gb|ACU13259.1|/9.01364e-92/unknown [Glycine max]
																																				Glyma15g12940	5.81	13.06	1.16854	gi|255638496|gb|ACU19557.1|/1.07442e-165/unknown [Glycine max]		Glyma11g05560	8.09	1.94	-2.06008	gi|255637453|gb|ACU19054.1|/3.77759e-178/unknown [Glycine max]
																																				Glyma11g12170	47.5	106.75	1.16824	gi|255627023|gb|ACU13856.1|/8.09192e-71/unknown [Glycine max]		Glyma05g25800	26.57	6.35	-2.06497	gi|255633598|gb|ACU17158.1|/2.66035e-23/unknown [Glycine max]
																																				Glyma17g34110	112.6	253.02	1.16804	gi|255626577|gb|ACU13633.1|/8.78757e-122/unknown [Glycine max]		Glyma02g00290	7.39	1.76	-2.07	gi|255640552|gb|ACU20561.1|/2.01398e-80/unknown [Glycine max]
																																				Glyma02g00540	60.87	136.74	1.16763	gi|255638035|gb|ACU19332.1|/1.45527e-119/unknown [Glycine max]		Glyma11g09860	17.77	4.23	-2.07071	gi|255639313|gb|ACU19954.1|/5.3226e-107/unknown [Glycine max]
																																				Glyma08g11160	17.24	38.64	1.16434	gi|255628715|gb|ACU14702.1|/2.5411e-50/unknown [Glycine max]		Glyma13g17000	8.27	1.94	-2.09183	gi|255627275|gb|ACU13982.1|/2.72285e-92/unknown [Glycine max]
																																				Glyma06g01970	103.45	231.84	1.1642	gi|255630030|gb|ACU15367.1|/5.07751e-71/unknown [Glycine max]		Glyma06g11910	7.57	1.76	-2.10472	gi|255642469|gb|ACU21498.1|/1.06589e-137/unknown [Glycine max]
																																				Glyma11g04560	94.65	212.08	1.16393	gi|255635600|gb|ACU18150.1|/2.16007e-96/unknown [Glycine max]		Glyma14g13770	12.14	2.82	-2.106	gi|116831533|gb|ABK28719.1|/7.5401e-07/unknown [Arabidopsis thaliana]
																																				Glyma14g00290	21.82	48.87	1.1633	gi|217074070|gb|ACJ85395.1|/1.79576e-156/unknown [Medicago truncatula]		Glyma13g36170	11.44	2.65	-2.11002	gi|255636705|gb|ACU18688.1|/0/unknown [Glycine max]
																																				Glyma17g33800	6.86	15.35	1.16196	gi|255626141|gb|ACU13415.1|/3.82628e-99/unknown [Glycine max]		Glyma17g05030	45.04	10.41	-2.11324	gi|217069818|gb|ACJ83269.1|/1.17322e-112/unknown [Medicago truncatula]
																																				Glyma05g09160	29.73	66.52	1.16187	gi|255628443|gb|ACU14566.1|/1.28148e-29/unknown [Glycine max]		Glyma13g00530	26.04	6	-2.1177	gi|255628537|gb|ACU14613.1|/3.32929e-89/unknown [Glycine max]
																																				Glyma14g04260	41.52	92.81	1.16047	gi|255627923|gb|ACU14306.1|/1.35767e-79/unknown [Glycine max]		Glyma10g37630	10.73	2.47	-2.11907	gi|255645321|gb|ACU23157.1|/5.0624e-142/unknown [Glycine max]
																																				Glyma17g03540	6.16	13.76	1.15948	gi|255628633|gb|ACU14661.1|/1.97781e-108/unknown [Glycine max]		Glyma10g35030	8.44	1.94	-2.12119	gi|255634745|gb|ACU17734.1|/2.76908e-114/unknown [Glycine max]
																																				Glyma06g17930	142.16	317.42	1.15888	gi|255627339|gb|ACU14014.1|/9.63177e-54/unknown [Glycine max]		Glyma10g11580	41.52	9.53	-2.12326	gi|255640179|gb|ACU20380.1|/6.14357e-156/unknown [Glycine max]
																																				Glyma09g04530	15.66	34.94	1.1578	gi|255626829|gb|ACU13759.1|/1.42788e-83/unknown [Glycine max]		Glyma02g10410	6.16	1.41	-2.12724	gi|217073748|gb|ACJ85234.1|/5.14908e-92/unknown [Medicago truncatula]
																																				Glyma18g53730	6.33	14.12	1.15746	gi|255627753|gb|ACU14221.1|/1.15168e-47/unknown [Glycine max]		Glyma19g00820	78.64	18	-2.12727	gi|255625607|gb|ACU13148.1|/5.35708e-108/unknown [Glycine max]
																																				Glyma14g02700	11.96	26.64	1.15538	gi|255626797|gb|ACU13743.1|/3.9172e-118/unknown [Glycine max]		Glyma12g07030	82.51	18.88	-2.12771	gi|255626827|gb|ACU13758.1|/2.39557e-46/unknown [Glycine max]
																																				Glyma12g28660	13.02	28.94	1.15234	gi|255645100|gb|ACU23049.1|/1.09556e-118/unknown [Glycine max]		Glyma08g20960	146.73	33.52	-2.13007	gi|255627699|gb|ACU14194.1|/1.58504e-77/unknown [Glycine max]
																																				Glyma02g45170	453.74	1006.6	1.14955	gi|255632932|gb|ACU16820.1|/4.4717e-40/unknown [Glycine max]		Glyma11g04130	90.43	20.64	-2.13136	gi|255628225|gb|ACU14457.1|/1.14447e-98/unknown [Glycine max]
																																				Glyma19g44920	63.51	140.8	1.14859	gi|255626283|gb|ACU13486.1|/5.85101e-27/unknown [Glycine max]		Glyma19g27260	28.68	6.53	-2.13489	gi|255647317|gb|ACU24125.1|/2.26918e-163/unknown [Glycine max]
																																				Glyma03g30280	5.81	12.88	1.14852	gi|255625699|gb|ACU13194.1|/2.28776e-104/unknown [Glycine max]		Glyma04g41480	5.45	1.24	-2.13592	gi|255645782|gb|ACU23383.1|/1.2031e-144/unknown [Glycine max]
																																				Glyma18g44120	36.42	80.63	1.14659	gi|255637572|gb|ACU19112.1|/4.39434e-110/unknown [Glycine max]		Glyma05g07620	5.45	1.24	-2.13592	gi|255628377|gb|ACU14533.1|/2.30848e-71/unknown [Glycine max]
																																				Glyma07g32120	8.62	19.06	1.14479	gi|217075142|gb|ACJ85931.1|/2.81429e-106/unknown [Medicago truncatula]		Glyma09g01610	9.32	2.12	-2.13627	gi|255633318|gb|ACU17016.1|/4.24133e-60/unknown [Glycine max]
																																				Glyma16g01880	5.28	11.65	1.14172	gi|255644450|gb|ACU22729.1|/1.0075e-155/unknown [Glycine max]		Glyma01g42440	7.74	1.76	-2.13676	gi|255645229|gb|ACU23112.1|/1.12257e-157/unknown [Glycine max]
																																				Glyma06g08980	8.09	17.82	1.13929	gi|255632125|gb|ACU16415.1|/3.35578e-73/unknown [Glycine max]		Glyma17g34960	18.65	4.23	-2.14045	gi|255639082|gb|ACU19841.1|/0/unknown [Glycine max]
																																				Glyma03g01760	5.45	12	1.13871	gi|255626403|gb|ACU13546.1|/8.01851e-79/unknown [Glycine max]		Glyma20g38440	510.57	115.75	-2.1411	gi|255627415|gb|ACU14052.1|/6.65011e-119/unknown [Glycine max]
																																				Glyma08g18780	11.96	26.29	1.1363	gi|255647835|gb|ACU24377.1|/1.77571e-54/unknown [Glycine max]		Glyma10g04520	7.04	1.59	-2.14655	gi|255571242|ref|XP_002526571.1|/7.02103e-166/protein with unknown function [Ricinus communis]
																																				Glyma02g05490	6.51	14.29	1.13428	gi|255647132|gb|ACU24034.1|/7.83485e-56/unknown [Glycine max]		Glyma14g04920	7.04	1.59	-2.14655	gi|87241272|gb|ABD33130.1|/2.33028e-117/Protein of unknown function DUF652 [Medicago truncatula]
																																				Glyma13g08480	23.4	51.34	1.13357	gi|255627467|gb|ACU14078.1|/4.54117e-84/unknown [Glycine max]		Glyma17g12440	18.83	4.23	-2.1543	gi|255647781|gb|ACU24351.1|/1.1034e-97/unknown [Glycine max]
																																				Glyma15g03560	19	41.64	1.13197	gi|255641545|gb|ACU21046.1|/0/unknown [Glycine max]		Glyma20g28890	2233.33	501.62	-2.15453	gi|255627107|gb|ACU13898.1|/3.51259e-80/unknown [Glycine max]
																																				Glyma03g38260	205.14	449.22	1.13081	gi|255630240|gb|ACU15475.1|/3.26737e-35/unknown [Glycine max]		Glyma12g31740	10.2	2.29	-2.15515	gi|255638538|gb|ACU19577.1|/1.33499e-110/unknown [Glycine max]
																																				Glyma14g06560	10.73	23.47	1.12917	gi|255633474|gb|ACU17095.1|/5.77906e-82/unknown [Glycine max]		Glyma04g37940	55.07	12.35	-2.15676	gi|255630661|gb|ACU15690.1|/3.95007e-75/unknown [Glycine max]
																																				Glyma01g37610	6.86	15	1.12868	gi|255632820|gb|ACU16763.1|/2.42101e-53/unknown [Glycine max]		Glyma13g37610	48.21	10.76	-2.16365	gi|255626917|gb|ACU13803.1|/4.42982e-109/unknown [Glycine max]
																																				Glyma10g01020	5.81	12.7	1.12822	gi|255640646|gb|ACU20608.1|/2.29763e-51/unknown [Glycine max]		Glyma11g20070	4.75	1.06	-2.16386	gi|255638291|gb|ACU19458.1|/1.42692e-43/unknown [Glycine max]
																																				Glyma07g07420	5.98	13.06	1.12694	gi|255631127|gb|ACU15929.1|/2.27449e-69/unknown [Glycine max]		Glyma19g22670	6.33	1.41	-2.16651	gi|255628043|gb|ACU14366.1|/3.68727e-55/unknown [Glycine max]
																																				Glyma09g20990	7.92	17.29	1.12637	gi|255642553|gb|ACU21540.1|/2.2652e-120/unknown [Glycine max]		Glyma05g30160	12.67	2.82	-2.16765	gi|255634511|gb|ACU17619.1|/0/unknown [Glycine max]
																																				Glyma04g29480	22.17	48.35	1.12491	gi|255630192|gb|ACU15451.1|/6.07608e-19/unknown [Glycine max]		Glyma17g07250	23.93	5.29	-2.17748	gi|255641964|gb|ACU21249.1|/7.08566e-142/unknown [Glycine max]
																																				Glyma20g23420	15.13	32.99	1.12462	gi|255640940|gb|ACU20750.1|/6.36799e-129/unknown [Glycine max]		Glyma20g01930	55.42	12.17	-2.18708	gi|255629746|gb|ACU15222.1|/7.21171e-74/unknown [Glycine max]
																																				Glyma16g33280	52.78	115.04	1.12407	gi|255644965|gb|ACU22982.1|/9.97825e-153/unknown [Glycine max]		Glyma17g07720	46.62	10.23	-2.18814	gi|255629029|gb|ACU14859.1|/6.21941e-09/unknown [Glycine max]
																																				Glyma06g07800	11.26	24.53	1.12334	gi|255635979|gb|ACU18335.1|/0/unknown [Glycine max]		Glyma16g05640	12.14	2.65	-2.1957	gi|255638521|gb|ACU19569.1|/0/unknown [Glycine max]
																																				Glyma05g37470	36.95	80.46	1.1227	gi|255627595|gb|ACU14142.1|/3.82501e-51/unknown [Glycine max]		Glyma18g05700	109.26	23.82	-2.19752	gi|255626107|gb|ACU13398.1|/4.75218e-122/unknown [Glycine max]
																																				Glyma07g16070	6.16	13.41	1.12231	gi|255629468|gb|ACU15080.1|/6.96657e-114/unknown [Glycine max]		Glyma09g37380	4.93	1.06	-2.21752	gi|255642056|gb|ACU21294.1|/4.39668e-121/unknown [Glycine max]
																																				Glyma10g41470	6.16	13.41	1.12231	gi|217075767|gb|ACJ86243.1|/7.14482e-145/unknown [Medicago truncatula]		Glyma07g36700	11.61	2.47	-2.23279	gi|255631834|gb|ACU16284.1|/5.94419e-70/unknown [Glycine max]
																																				Glyma05g31580	11.61	25.23	1.11977	gi|255630605|gb|ACU15662.1|/3.45842e-22/unknown [Glycine max]		Glyma13g07800	9.15	1.94	-2.23772	gi|255637351|gb|ACU19005.1|/8.01818e-145/unknown [Glycine max]
																																				Glyma20g24500	12.67	27.52	1.11906	gi|255630677|gb|ACU15698.1|/1.50842e-83/unknown [Glycine max]		Glyma06g17090	6.69	1.41	-2.24631	gi|255630474|gb|ACU15595.1|/5.39424e-97/unknown [Glycine max]
																																				Glyma03g40680	17.24	37.41	1.11766	gi|255648228|gb|ACU24567.1|/0/unknown [Glycine max]		Glyma10g41260	77.94	16.41	-2.24779	gi|255640638|gb|ACU20604.1|/5.60795e-78/unknown [Glycine max]
																																				Glyma15g01520	5.63	12.17	1.11212	gi|255635568|gb|ACU18134.1|/0/unknown [Glycine max]		Glyma13g07590	15.31	3.18	-2.26738	gi|118481089|gb|ABK92498.1|/2.17218e-92/unknown [Populus trichocarpa]
																																				Glyma08g01310	33.96	73.4	1.11194	gi|255638124|gb|ACU19376.1|/3.03846e-101/unknown [Glycine max]		Glyma10g43730	111.37	23.11	-2.26877	gi|255627415|gb|ACU14052.1|/5.83474e-115/unknown [Glycine max]
																																				Glyma20g22090	26.21	56.64	1.1117	gi|255639778|gb|ACU20182.1|/0/unknown [Glycine max]		Glyma16g19450	5.98	1.24	-2.26981	gi|255628833|gb|ACU14761.1|/1.38487e-88/unknown [Glycine max]
																																				Glyma07g15110	16.01	34.58	1.11096	gi|118481785|gb|ABK92831.1|/9.95198e-82/unknown [Populus trichocarpa]		Glyma11g18810	59.99	12.35	-2.28021	gi|255629265|gb|ACU14977.1|/2.27482e-96/unknown [Glycine max]
																																				Glyma04g01840	89.02	192.15	1.11003	gi|255629561|gb|ACU15128.1|/2.81211e-48/unknown [Glycine max]		Glyma10g28800	6.86	1.41	-2.28251	gi|255641877|gb|ACU21207.1|/0/unknown [Glycine max]
																																				Glyma13g23640	83.22	179.62	1.10995	gi|255629754|gb|ACU15226.1|/5.34123e-49/unknown [Glycine max]		Glyma09g07430	8.62	1.76	-2.29211	gi|255638276|gb|ACU19451.1|/2.59781e-132/unknown [Glycine max]
																																				Glyma06g45160	26.74	57.7	1.10957	gi|255640326|gb|ACU20451.1|/2.68535e-129/unknown [Glycine max]		Glyma20g35000	117.88	24	-2.29621	gi|255627611|gb|ACU14150.1|/1.87931e-61/unknown [Glycine max]
																																				Glyma10g02930	104.86	226.02	1.10799	gi|255645223|gb|ACU23109.1|/0/unknown [Glycine max]		Glyma13g33360	6.16	1.24	-2.31259	gi|255626515|gb|ACU13602.1|/2.47503e-77/unknown [Glycine max]
																																				Glyma06g14060	10.91	23.47	1.10517	gi|255648057|gb|ACU24484.1|/1.71199e-86/unknown [Glycine max]		Glyma06g22220	75.48	15.17	-2.31487	gi|255629883|gb|ACU15292.1|/4.70554e-86/unknown [Glycine max]
																																				Glyma12g03060	8.62	18.53	1.1041	gi|255644690|gb|ACU22847.1|/0/unknown [Glycine max]		Glyma08g45130	7.92	1.59	-2.31647	gi|217073304|gb|ACJ85011.1|/6.02977e-115/unknown [Medicago truncatula]
[truncated: 190 more rows]
